# Supplementary material for: Feeding sequence-regulated divergent (4 + 1 + 1′) annulations of α-bromo carbonyls and 1-azadienes via computational calculation-based mechanism elucidation
Source: Royal Society of Chemistry journal article supplement (doi:10.1039/d2qo00052k), 2022-01-01
Supplement: d2qo00052k1.pdf [file d2qo00052k1.pdf]

# Feeding sequence-regulated divergent (4 + 1 + 1') annulations of $\alpha$ -bromo carbonyls and 1-azadienes via computational calculations-based mechanism elucidation

Rong Zeng,<sup>a</sup> Zheng Wang,<sup>a</sup> Ruikun Peng,<sup>a</sup> Peng Yan,<sup>a</sup> Jie Yang,<sup>a</sup> Qian Zhou,<sup>a</sup> Jing Gu,<sup>a</sup> Peng-fei Zheng,<sup>a</sup> Ying-Chun Chen<sup>a,b</sup> and Qin Ouyang<sup>\*a</sup>

<sup>a</sup>College of Pharmacy, Third Military Medical University, Shapingba, Chongqing 400038, China

<sup>b</sup>Department of Medicinal Chemistry, West China School of Pharmacy, Sichuan University, Chengdu 610041, China

E-mail: ouyangq@tmmu.edu.cn

## Supporting Information

|                                                                                        |            |
|----------------------------------------------------------------------------------------|------------|
| <b>1. General methods .....</b>                                                        | <b>S2</b>  |
| <b>2. General procedure for the preparation of 1-azadienes and ammonium salts.....</b> | <b>S2</b>  |
| <b>3. General procedure for (4 + 1 + 1') annulations.....</b>                          | <b>S2</b>  |
| <b>4. (4 + 1 + 1') annulation at a 1.0 mmol scale .....</b>                            | <b>S15</b> |
| <b>5. Transformation of products 4c and 4d .....</b>                                   | <b>S15</b> |
| <b>6. Crystal data and structural refinement for product 4d .....</b>                  | <b>S17</b> |
| <b>7. Mechanistic study by computational calculations .....</b>                        | <b>S19</b> |
| <b>8. NMR Spectra .....</b>                                                            | <b>S25</b> |
| <b>9. References .....</b>                                                             | <b>S52</b> |
| <b>10. Computational data .....</b>                                                    | <b>S53</b> |

## 1. General methods

<sup>1</sup>H NMR or <sup>13</sup>C NMR spectra were recorded on Agilent 600 or 150 MHz NMR spectrometer, respectively (Chemical shifts were reported in ppm from tetramethylsilane with the solvent resonance as the internal standard in CDCl<sub>3</sub> solution, unless otherwise noted). The following abbreviations were used to explain the multiplicities: s = singlet, d = doublet, t = triplet, q = quartet, td = triple doublet, dt = double triplet, m = multiplet, and coupling constants (*J*) are reported in Hertz (Hz). ESI-HRMS was recorded on a Waters SYNAPT G2. Melting points were determined using a capillary melting point apparatus. Column chromatography was performed on silica gel (300-400 mesh) eluting with ethyl acetate (EtOAc) and petroleum ether (PE) or dichloromethane (CH<sub>2</sub>Cl<sub>2</sub>)/methanol (MeOH). TLC was performed on glass-backed silica plates. UV light, I<sub>2</sub>, and solution of potassium permanganate were used to visualize products or the starting materials. All chemicals were used without purification as commercially available unless otherwise noted. Anhydrous acetonitrile (MeCN) was distilled over CaH<sub>2</sub> and deoxygenated with argon. Petroleum ether (60–90 °C) was redistilled. Unless otherwise noted, all reactions were carried out under ambient atmosphere.

## 2. General procedure for the preparation of 1-azadienes and ammonium salts

The 1-azadienes were prepared according to the reported methods,<sup>1</sup> and all the <sup>1</sup>H and <sup>13</sup>C NMR spectra of the obtained 1-azadienes were accordant with the literature data.

Ammonium salts can be easily prepared from amine and  $\alpha$ -bromide. DABCO or DMAP was dissolved in a small amount of acetonitrile, and equimolar  $\alpha$ -bromide was added and stirred for 3 hours. The white ammonium salt was filtered and washed by chilled acetonitrile. After drying, the ammonium salt was obtained in a nearly quantitative yield.

## 3. General procedure for (4 + 1 + 1') annulations

**Procedure A:** DABCO (0.2 mmol, 2.0 equiv) or DMAP (0.2 mmol, 2.0 equiv) was dissolved in MeCN (2.0 mL), and the 1<sup>st</sup>  $\alpha$ -bromide **2** (0.2 mmol, 2.0 equiv) was added and stirred for 60 min at 40 °C. Then, Cs<sub>2</sub>CO<sub>3</sub> (0.4 mmol, 4.0 equiv) and 1-azadiene **1** (0.1 mmol, 1.0 equiv) were added to the solution. After 15 minutes, the 2<sup>nd</sup>  $\alpha$ -bromide **2** (0.2 mmol, 2.0 equiv) was added and the reaction was continued for 20 hours. After removal of the solvent, the residue was subjected to chromatography on a silica gel (300-400 mesh) column using petroleum ether (PE):EtOAc (15: 1-5: 1) as eluent to afford the product **4**.

**Procedure B:** The ammonium salt was obtained by the reaction of tertiary amine and  $\alpha$ -bromide in MeCN. Ammonium salt (0.105 mmol, 1.05 equiv), Cs<sub>2</sub>CO<sub>3</sub> (0.4 mmol, 4.0 equiv), 1-azadiene **1** (0.1 mmol, 1.0 equiv) were added to MeCN (2.0 mL) and were stirred at 40 °C until **1** disappeared. This process took about 5 to 15 minutes, which could be easily judged from the

disappearance of the yellow color of the substrate. Then the 2<sup>nd</sup>  $\alpha$ -bromide **2** (0.15 mmol, 1.5 equiv) was added and stirred for 20 hours. After removal of the solvent, the residue was subjected to chromatography on a silica gel (300-400 mesh) column using PE: EtOAc (15: 1-5: 1) as eluent to afford the product **4**.

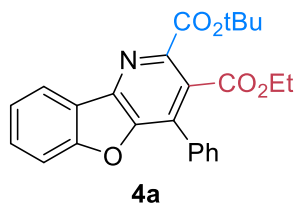

### 2-(*Tert*-butyl) 3-ethyl 4-phenylbenzofuro[3,2-*b*]pyridine-2,3-dicarboxylate (**4a**):

Through procedure B: Ethyl bromoacetate-DABCO salt (29.2 mg, 0.105 mmol, 1.05 equiv), Cs<sub>2</sub>CO<sub>3</sub> (130 mg, 0.4 mmol, 4.0 equiv) and 1-azadiene **1a** (37.5 mg, 0.1 mmol, 1.0 equiv) were dissolved in dry MeCN (2.0 mL) and were stirred at 40 °C until **1a** disappeared. *Tert*-Butyl bromoacetate (29.3 mg, 21.9  $\mu$ L, 0.15 mmol, 1.5 equiv) was added and stirred for 20 hours. After completion, purification by flash chromatography on silica gel (PE: EtOAc = 10: 1) gave product **4a**: 25.0 mg (0.060 mmol), as a white solid, yield 60%. M.p. = 142–144 °C. <sup>1</sup>H NMR (600 MHz, CDCl<sub>3</sub>)  $\delta$  8.39 (d,  $J$  = 7.7 Hz, 1H), 7.71–7.50 (m, 7H), 7.50–7.45 (m, 1H), 4.15 (q,  $J$  = 7.2 Hz, 2H), 1.65 (s, 9H), 0.99 (t,  $J$  = 7.2 Hz, 3H) ppm. <sup>13</sup>C NMR (150 MHz, CDCl<sub>3</sub>)  $\delta$  166.81, 164.20, 158.81, 147.77, 144.58, 144.13, 131.91, 131.57, 130.30, 129.33, 129.22, 128.55, 128.40, 124.10, 122.63, 122.58, 112.40, 83.40, 61.79, 27.94, 13.53 ppm. HRMS (ESI) calcd. for [C<sub>25</sub>H<sub>23</sub>NO<sub>5</sub>+Na]<sup>+</sup> 440.1468, found 440.1472.

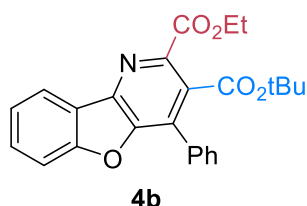

### 3-(*Tert*-butyl) 2-ethyl 4-phenylbenzofuro[3,2-*b*]pyridine-2,3-dicarboxylate (**4b**):

Through procedure B: *Tert*-Butyl bromoacetate-DABCO salt (32.1 mg, 0.105 mmol, 1.05 equiv), Cs<sub>2</sub>CO<sub>3</sub> (130 mg, 0.4 mmol, 4.0 equiv) and 1-azadiene **1a** (37.5 mg, 0.1 mmol, 1.0 equiv) were dissolved in dry acetonitrile (2.0 mL) and were stirred at 40 °C until **1a** disappeared. Ethyl bromoacetate (25.1 mg, 16.6  $\mu$ L, 0.15 mmol, 1.5 equiv) was added and stirred for 20 hours. After completion, purification by flash chromatography on silica gel (PE: EtOAc: = 10: 1) gave product **4b**: 24.6 mg (0.059 mmol), as a white solid, yield 59%. M.p. = 139–141 °C. <sup>1</sup>H NMR (600 MHz, CDCl<sub>3</sub>)  $\delta$  8.37 (d,  $J$  = 7.8 Hz, 1H), 7.65–7.51 (m, 7H), 7.50–7.45 (m, 1H), 4.54 (q,  $J$  = 7.2 Hz, 2H), 1.49 (t,  $J$  = 7.1 Hz, 3H), 1.30 (s, 9H) ppm. <sup>13</sup>C NMR (150 MHz, CDCl<sub>3</sub>)  $\delta$  165.44, 165.30, 158.84,

148.19, 144.13, 142.89, 132.02, 131.47, 130.29, 130.11, 129.52, 129.26, 128.47, 124.09, 122.55, 122.46, 112.45, 83.13, 62.40, 27.56, 14.28 ppm. HRMS (ESI) calcd. for  $[C_{25}H_{23}NO_5+Na]^+$  440.1468, found 440.1471.

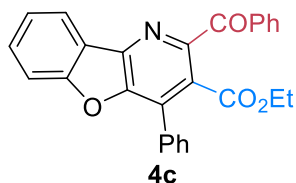

#### Ethyl 2-benzoyl-4-phenylbenzofuro[3,2-*b*]pyridine-3-carboxylate (**4c**):

Through general procedure B: Ethyl bromoacetate-DMAP salt (30.2 mg, 0.105 mmol, 1.05 equiv),  $Cs_2CO_3$  (130 mg, 0.4 mmol, 4.0 equiv) and 1-azadiene **1a** (37.5 mg, 0.1 mmol, 1.0 equiv) were dissolved in dry acetonitrile (2.0 mL) and were stirred at 40 °C until **1a** disappeared. 2-Bromoacetophenone (30.0 mg, 0.15 mmol, 1.5 equiv) was added and stirred for 20 hours. After completion, purification by flash chromatography on silica gel (PE: EtOAc = 10: 1) gave product **4c**: 38.0 mg (0.090 mmol), as a white solid, yield 90%. M.p. = 145–146 °C.  $^1H$  NMR (600 MHz,  $CDCl_3$ )  $\delta$  8.25 (d,  $J = 7.8$  Hz, 1H), 8.11 (d,  $J = 7.7$  Hz, 2H), 7.67–7.60 (m, 5H), 7.54 (dq,  $J = 15.6, 7.7, 7.0$  Hz, 5H), 7.49–7.44 (m, 1H), 4.09 (q,  $J = 7.2$  Hz, 2H), 0.96 (t,  $J = 7.2$  Hz, 3H) ppm.  $^{13}C$  NMR (150 MHz,  $CDCl_3$ ) 193.47, 166.81, 158.91, 151.28, 147.46, 143.83, 135.95, 133.35, 132.92, 131.69, 131.10, 130.39, 129.37, 129.24, 128.59, 128.25, 127.79, 124.17, 122.65, 122.17, 112.57, 61.91, 13.39 ppm. HRMS (ESI) calcd. for  $[C_{27}H_{19}NO_4+H]^+$  422.1387, found 422.1389.

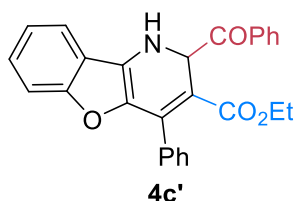

#### Ethyl 2-benzoyl-4-phenyl-1,2-dihydrobenzofuro[3,2-*b*]pyridine-3-carboxylate (**4c'**):

Through general procedure B: Ethyl bromoacetate-DMAP salt (30.2 mg, 0.105 mmol, 1.05 equiv),  $Cs_2CO_3$  (130 mg, 0.4 mmol, 4.0 equiv) and 1-azadiene **1a** (37.5 mg, 0.1 mmol, 1.0 equiv) were dissolved in dry acetonitrile (2.0 mL) and were stirred at 40 °C until **1a** disappeared. 2-Bromoacetophenone (30.0 mg, 0.15 mmol, 1.5 equiv) was added and stirred for 5 hours. An intermediate product was found and purified by flash chromatography on silica gel (PE: EtOAc = 10: 1) gave intermediate product **4c'**: 9.7 mg (0.023 mmol), as a white solid, yield 23%. M.p. = 142–143 °C.  $^1H$  NMR (600 MHz,  $CDCl_3$ )  $\delta$  8.06–8.00 (m, 2H), 7.58 (t,  $J = 7.4$  Hz, 1H), 7.46 (t,  $J = 7.6$  Hz, 2H), 7.44–7.39 (m, 3H), 7.36 (d,  $J = 8.3$  Hz, 1H), 7.29 (t,  $J = 7.5$  Hz, 2H), 7.26–7.22 (m, 1H), 7.20 (q,  $J = 7.8$  Hz, 2H), 6.90 (d,  $J = 8.4$  Hz, 1H), 5.54 (s, 1H), 3.79 (qt,  $J = 6.9, 3.4$  Hz, 2H), 0.85 (t,  $J = 7.1$  Hz, 3H) ppm.  $^{13}C$  NMR (150 MHz,  $CDCl_3$ ) 192.92, 166.30, 153.95, 144.91, 144.04,

141.09, 135.40, 133.93, 128.90, 128.89, 128.37, 128.17, 126.96, 124.43, 122.78, 120.02, 117.31, 117.17, 111.99, 102.48, 60.41, 41.61, 13.54 ppm. HRMS (ESI) calcd. for  $[C_{27}H_{21}NO_4+Na]^+$  446.1363, found 446.1368.

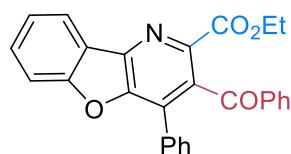

**4d**

#### **Ethyl 3-benzoyl-4-phenylbenzofuro[3,2-*b*]pyridine-2-carboxylate (4d) :**

Through general procedure B: Bromoacetophenone-DMAP salt (33.6 mg, 0.105 mmol, 1.05 equiv),  $Cs_2CO_3$  (260 mg, 0.8 mmol, 8.0 equiv) and 1-azadiene **1a** (37.5 mg, 0.1 mmol, 1.0 equiv) were dissolved in dry acetonitrile (2.0 mL) and were stirred at 40 °C until **1a** disappeared. Ethyl bromoacetate (25.1 mg, 16.6  $\mu$ L, 0.15 mmol, 1.5 equiv) was added and stirred for 20 hours. After completion, purification by flash chromatography on silica gel (PE: EtOAc = 10: 1) gave product **4d**: 27.4 mg (0.065 mmol), as a white solid, yield 65%. M.p. = 143–144 °C.  $^1H$  NMR (600 MHz,  $CDCl_3$ )  $\delta$  8.45 (d,  $J$  = 7.8 Hz, 1H), 7.66–7.62 (m, 3H), 7.60 (d,  $J$  = 8.2 Hz, 1H), 7.54–7.50 (m, 1H), 7.46–7.42 (m, 1H), 7.41–7.37 (m, 2H), 7.33 (q,  $J$  = 2.9 Hz, 3H), 7.30 (t,  $J$  = 7.7 Hz, 2H), 4.31 (q,  $J$  = 7.2 Hz, 2H), 1.21 (t,  $J$  = 7.1 Hz, 3H) ppm.  $^{13}C$  NMR (150 MHz,  $CDCl_3$ ) 194.48, 165.09, 158.84, 148.39, 144.73, 142.74, 137.60, 135.19, 133.15, 132.26, 130.68, 130.52, 129.80, 129.24, 128.98, 128.43, 128.41, 124.27, 122.57, 122.55, 112.54, 62.52, 13.79 ppm. HRMS (ESI) calcd. for  $[C_{27}H_{19}NO_4+Na]^+$  444.1206, found 444.1211.

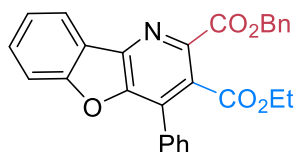

**4e**

#### **2-Benzyl 3-ethyl 4-phenylbenzofuro[3,2-*b*]pyridine-2,3-dicarboxylate (4e):**

Through general procedure B: Ethyl bromoacetate-DABCO salt (29.2 mg, 0.105 mmol, 1.05 equiv),  $Cs_2CO_3$  (130 mg, 0.4 mmol, 4.0 equiv) and 1-azadiene **1a** (37.5 mg, 0.1 mmol, 1.0 equiv) were dissolved in dry acetonitrile (2.0 mL) and were stirred at 40 °C until **1a** disappeared. Benzyl bromoacetate (34.4 mg, 23.8  $\mu$ L, 0.15 mmol, 1.5 equiv) was added and stirred for 20 hours. After completion, purification by flash chromatography on silica gel (PE: EtOAc = 10: 1) gave product **4e**: 41.9 mg (0.093 mmol), as a white solid, yield 93%. M.p. = 155–156 °C.  $^1H$  NMR (600 MHz,  $CDCl_3$ )  $\delta$  8.38 (d,  $J$  = 7.8 Hz, 1H), 7.62 (ddd,  $J$  = 8.4, 7.0, 1.4 Hz, 1H), 7.60–7.55 (m, 3H), 7.56–7.51 (m, 4H), 7.50 (s, 1H), 7.48 (d,  $J$  = 7.3 Hz, 1H), 7.39 (t,  $J$  = 7.4 Hz, 2H), 7.34 (t,  $J$  = 7.1 Hz, 1H), 5.49 (s, 2H), 3.97 (q,  $J$  = 7.2 Hz, 2H), 0.94 (t,  $J$  = 7.2 Hz, 3H) ppm.  $^{13}C$  NMR (150 MHz,  $CDCl_3$ )  $\delta$  166.60, 165.02, 158.89, 148.13, 144.73, 142.31, 135.21, 132.01, 131.24, 130.51, 129.46,

129.33, 129.27, 128.68, 128.58, 128.55, 128.44, 124.23, 122.55, 122.47, 112.48, 68.05, 61.86, 13.53 ppm. HRMS (ESI) calcd. for  $[C_{28}H_{21}NO_5+Na]^+$  474.1312, found 474.1318.

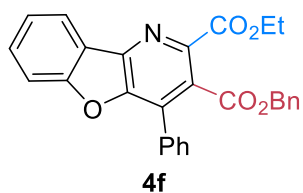

### 3-Benzyl 2-ethyl 4-phenylbenzofuro[3,2-*b*]pyridine-2,3-dicarboxylate (**4f**) :

Through general procedure B: Benzyl bromoacetate-DABCO salt (35.7 mg, 0.105 mmol, 1.05 equiv),  $CS_2CO_3$  (130 mg, 0.4 mmol, 4.0 equiv) and 1-azadiene **1a** (37.5mg, 0.1 mmol, 1.0 equiv) were dissolved in dry acetonitrile (2.0 mL) and were stirred at 40 °C until **1a** disappeared. Ethyl bromoacetate (25.1 mg, 16.6  $\mu$ L, 0.15 mmol, 1.5 equiv) was added and stirred for 20 hours. After completion, purification by flash chromatography on silica gel (PE: EtOAc = 10: 1) gave product **4f**: 33.8 mg (0.075 mmol), as a white solid, yield 75%. M.p. = 150–151 °C.  $^1H$  NMR (600 MHz,  $CDCl_3$ )  $\delta$  8.39 (d,  $J$  = 7.8 Hz, 1H), 7.62 (td,  $J$  = 7.7, 7.0, 1.4 Hz, 1H), 7.60–7.53 (m, 3H), 7.53–7.44 (m, 4H), 7.28 (d,  $J$  = 6.9 Hz, 3H), 7.09 (dd,  $J$  = 7.4, 2.2 Hz, 2H), 5.16 (s, 2H), 4.49 (q,  $J$  = 7.2 Hz, 2H), 1.46 (t,  $J$  = 7.2 Hz, 3H) ppm.  $^{13}C$  NMR (150 MHz,  $CDCl_3$ )  $\delta$  166.67, 165.11, 158.89, 148.11, 144.71, 142.49, 134.77, 132.04, 131.05, 130.52, 129.53, 129.31, 128.98, 128.68, 128.58, 128.46, 128.31, 124.22, 122.57, 122.44, 112.49, 67.93, 62.57, 14.21 ppm. HRMS (ESI) calcd. for  $[C_{28}H_{21}NO_5+Na]^+$  474.1312, found 474.1319.

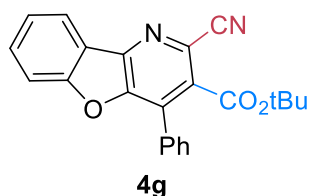

### *Tert*-butyl 2-cyano-4-phenylbenzofuro[3,2-*b*]pyridine-3-carboxylate (**4g**):

Through general procedure B: *Tert*-Butyl bromoacetate-DABCO salt (32.1 mg, 0.105 mmol, 1.05 equiv),  $CS_2CO_3$  (130 mg, 0.4 mmol, 4.0 equiv) and 1-azadiene **1a** (37.5mg, 0.1 mmol, 1.0 equiv) were dissolved in dry acetonitrile (2.0 mL) and were stirred at 40 °C until **1a** disappeared. Bromoacetonitrile (24.0 mg, 13.9  $\mu$ L, 0.15 mmol, 1.5 equiv) was added and stirred for 20 hours. After completion, purification by flash chromatography on silica gel (PE: EtOAc = 10: 1) gave product **4g**: 31.8 mg (0.086 mmol), as a white solid, yield 86%. M.p. = 143–145 °C  $^1H$  NMR (600 MHz,  $CDCl_3$ )  $\delta$  8.31 (d,  $J$  = 7.8 Hz, 1H), 7.67 (ddd,  $J$  = 8.5, 7.1, 1.4 Hz, 1H), 7.63–7.58 (m, 3H), 7.57 (q,  $J$  = 3.2, 2.5 Hz, 3H), 7.53 (t,  $J$  = 7.5 Hz, 1H), 1.45 (d,  $J$  = 1.4 Hz, 9H) ppm.  $^{13}C$  NMR (150 MHz,  $CDCl_3$ )  $\delta$  163.77, 159.05, 148.04, 146.08, 132.43, 132.36, 131.27, 130.91, 129.84, 129.27, 128.78, 127.30, 124.76, 122.35, 121.77, 116.22, 112.62, 84.85, 27.58 ppm. HRMS (ESI) calcd. for  $[C_{23}H_{18}N_2O_3+Na]^+$  393.1209, found 393.1214.

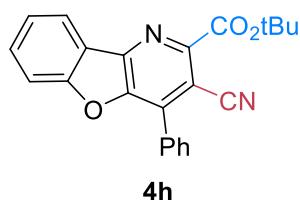

***Tert*-butyl 3-cyano-4-phenylbenzofuro[3,2-*b*]pyridine-2-carboxylate (**4h**):**

Through general procedure B: Bromoacetonitrile-DABCO salt (24.3 mg, 0.105 mmol, 1.05 equiv), Cs<sub>2</sub>CO<sub>3</sub> (130 mg, 0.4 mmol, 4.0 equiv) and 1-azadiene **1a** (37.5mg, 0.1 mmol, 1.0 equiv) were dissolved in dry acetonitrile (2.0 mL) and were stirred at 40 °C until **1a** disappeared. *Tert*-Butyl bromoacetate (29.3 mg, 21.9 μL, 0.15 mmol, 1.5 equiv) was added and stirred for 20 hours. After completion, purification by flash chromatography on silica gel (PE: EtOAc = 10: 1) gave product **4h**: 11.8 mg (0.032 mmol), as a white solid, yield 32%. M.p. = 142–144 °C. <sup>1</sup>H NMR (600 MHz, CDCl<sub>3</sub>) δ 8.41 (d, *J* = 7.8 Hz, 1H), 7.82–7.77 (m, 2H), 7.69 (ddd, *J* = 8.5, 7.2, 1.4 Hz, 1H), 7.63 (dd, *J* = 8.7, 6.8 Hz, 4H), 7.53 (t, *J* = 7.5 Hz, 1H), 1.75 (s, 9H) ppm. <sup>13</sup>C NMR (150 MHz, CDCl<sub>3</sub>) δ 162.95, 159.40, 149.52, 146.84, 146.61, 137.41, 131.63, 130.61, 129.98, 129.90, 128.96, 124.69, 123.01, 122.15, 115.61, 112.66, 105.48, 85.05, 28.00 ppm. HRMS (ESI) calcd. for [C<sub>23</sub>H<sub>18</sub>N<sub>2</sub>O<sub>3</sub>+Na]<sup>+</sup> 393.1209, found 393.1214.

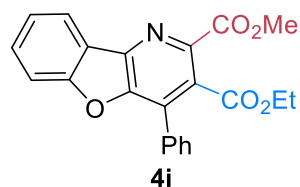

**3-Ethyl 2-methyl 4-phenylbenzofuro[3,2-*b*]pyridine-2,3-dicarboxylate (**4i**):**

Through general procedure B: Ethyl bromoacetate-DMAP salt (30.2 mg, 0.105 mmol, 1.05 equiv), Cs<sub>2</sub>CO<sub>3</sub> (130 mg, 0.4 mmol, 4.0 equiv) and 1-azadiene **1a** (37.5mg, 0.1 mmol, 1.0 equiv) were dissolved in dry acetonitrile (2.0 mL) and were stirred at 40 °C until **1a** disappeared. Methyl bromoacetate (23.0mg, 14.2 μL, 0.15 mmol, 1.5 equiv) was added and stirred for 20 hours. After completion, purification by flash chromatography on silica gel (PE: EtOAc = 10: 1) gave product **4i**: 24.4 mg (0.065 mmol), as a white solid, yield 65%. M.p. = 142–143 °C. <sup>1</sup>H NMR (600 MHz, CDCl<sub>3</sub>) δ 8.39 (d, *J* = 7.7 Hz, 1H), 7.63 (td, *J* = 7.5, 6.9, 1.2 Hz, 1H), 7.61–7.57 (m, 3H), 7.57–7.52 (m, 3H), 7.50 (t, *J* = 7.2 Hz, 1H), 4.21 (q, *J* = 7.1 Hz, 2H), 4.07 (s, 3H), 1.09 (t, *J* = 7.2 Hz, 3H) ppm. <sup>13</sup>C NMR (150 MHz, CDCl<sub>3</sub>) δ 166.71, 165.50, 158.91, 148.28, 144.62, 141.73, 132.05, 131.09, 130.57, 129.77, 129.53, 129.33, 128.61, 124.27, 122.43, 122.40, 112.54, 62.01, 53.38, 13.70 ppm. HRMS (ESI) calcd. for [C<sub>22</sub>H<sub>17</sub>NO<sub>5</sub>+H]<sup>+</sup> 376.1180, found 376.1184.

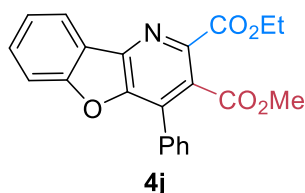

### 2-Ethyl 3-methyl 4-phenylbenzofuro[3,2-*b*]pyridine-2,3-dicarboxylate (**4j**):

Through general procedure B: Methyl bromoacetate-DMAP salt (28.8 mg, 0.105 mmol, 1.05 equiv), Cs<sub>2</sub>CO<sub>3</sub> (130 mg, 0.4 mmol, 4.0 equiv) and 1-azadiene **1a** (37.5mg, 0.1 mmol, 1.0 equiv) were dissolved in dry acetonitrile (2.0 mL) and were stirred at 40 °C until **1a** disappeared. Ethyl bromoacetate (25.1mg, 16.6 μL, 0.15 mmol, 1.5 equiv) was added and stirred for 20 hours. After completion, purification by flash chromatography on silica gel (PE: EtOAc = 10: 1) gave product **4j**: 26.3 mg (0.070 mmol), as a white solid, yield 70%. M.p. = 141–143 °C. <sup>1</sup>H NMR (600 MHz, CDCl<sub>3</sub>) δ 8.39 (d, *J* = 7.8 Hz, 1H), 7.64–7.61 (m, 1H), 7.61–7.57 (m, 3H), 7.57–7.52 (m, 3H), 7.51–7.47 (m, 1H), 4.53 (q, *J* = 7.2 Hz, 2H), 3.73 (s, 3H), 1.49 (t, *J* = 7.1 Hz, 3H) ppm. <sup>13</sup>C NMR (150 MHz, CDCl<sub>3</sub>) δ 167.33, 165.12, 158.90, 148.13, 144.74, 142.32, 132.01, 131.13, 130.54, 129.56, 129.22, 129.16, 128.68, 124.23, 122.57, 122.45, 112.50, 62.60, 52.74, 14.21 ppm. HRMS (ESI) calcd. for [C<sub>22</sub>H<sub>17</sub>NO<sub>5</sub>+Na]<sup>+</sup> 398.0999, found 398.1001.

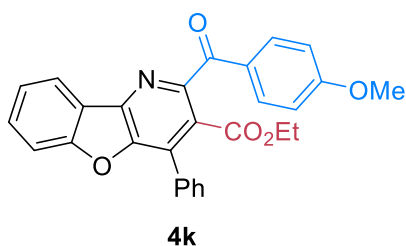

### Ethyl 2-(4-methoxybenzoyl)-4-phenylbenzofuro[3,2-*b*]pyridine-3-carboxylate (**4k**):

Through general procedure B: Ethyl bromoacetate-DMAP salt (30.2 mg, 0.105 mmol, 1.05 equiv), Cs<sub>2</sub>CO<sub>3</sub> (130 mg, 0.4 mmol, 4.0 equiv) and 1-azadiene **1a** (37.5mg, 0.1 mmol, 1.0 equiv) were dissolved in dry acetonitrile (2.0 mL) and were stirred at 40 °C until **1a** disappeared. 2-bromo-1-(4-methoxyphenyl)ethan-1-one (34.2mg, 0.15 mmol, 1.5 equiv) was added and stirred for 20 hours. After completion, purification by flash chromatography on silica gel (PE: EtOAc = 10: 1) gave product **4k**: 29.3 mg (0.065 mmol), as a white solid, yield 65%. M.p. = 146–148 °C. <sup>1</sup>H NMR (600 MHz, CDCl<sub>3</sub>) δ 8.29–8.23 (m, 1H), 8.16–8.11 (m, 2H), 7.64–7.60 (m, 4H), 7.55 (qd, *J* = 7.4, 6.2, 3.6 Hz, 3H), 7.47 (dt, *J* = 9.2, 4.0 Hz, 1H), 7.02–6.97 (m, 2H), 4.09 (qd, *J* = 7.2, 1.2 Hz, 2H), 3.91 (d, *J* = 1.3 Hz, 3H), 0.96 (td, *J* = 7.1, 1.2 Hz, 3H) ppm. <sup>13</sup>C NMR (150 MHz, CDCl<sub>3</sub>) δ 192.01, 166.89, 163.86, 158.89, 151.87, 147.35, 143.70, 133.57, 132.92, 131.82, 130.31, 129.34, 129.26, 128.91, 128.59, 127.69, 124.13, 122.74, 122.13, 113.60, 112.57, 61.86, 55.53, 13.41 ppm. HRMS (ESI) calcd. for [C<sub>28</sub>H<sub>21</sub>NO<sub>5</sub>+Na]<sup>+</sup> 474.1312, found 474.1321.



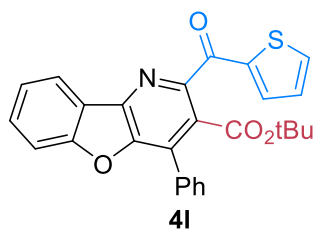

**Tert-butyl 4-phenyl-2-(thiophene-2-carbonyl)benzofuro[3,2-*b*]pyridine-3-carboxylate (4l):**

Through general procedure B: *Tert*-Butyl bromoacetate-DMAP salt (33.2 mg, 0.105 mmol, 1.05 equiv), Cs<sub>2</sub>CO<sub>3</sub> (130 mg, 0.4 mmol, 4.0 equiv) and 1-azadiene **1a** (37.5mg, 0.1 mmol, 1.0 equiv) were dissolved in dry acetonitrile (2.0 mL) and were stirred at 40 °C until **1a** disappeared. 2-bromo-1-(thiophen-2-yl)ethan-1-one (30.6mg, 0.15 mmol, 1.5 equiv) was added and stirred for 20 hours. After completion, purification by flash chromatography on silica gel (PE: EtOAc = 10: 1) gave product **4l**: 25.9 mg (0.057 mmol), as a white solid, yield 57%. M.p. = 142–143 °C. <sup>1</sup>H NMR (600 MHz, CDCl<sub>3</sub>) δ 8.33 (dt, *J* = 7.8, 1.0 Hz, 1H), 8.22 (dd, *J* = 3.8, 1.2 Hz, 1H), 7.80 (dd, *J* = 5.0, 1.2 Hz, 1H), 7.61 (ddt, *J* = 7.2, 5.6, 2.7 Hz, 4H), 7.58–7.53 (m, 3H), 7.50 (ddd, *J* = 8.0, 6.5, 1.6 Hz, 1H), 7.22 (dd, *J* = 5.0, 3.8 Hz, 1H), 1.32 (s, 9H) ppm. <sup>13</sup>C NMR (150 MHz, CDCl<sub>3</sub>) δ 183.64, 165.46, 158.88, 148.51, 148.19, 143.06, 140.83, 136.75, 136.15, 132.49, 131.46, 130.28, 129.73, 129.55, 129.31, 128.51, 127.70, 124.24, 122.75, 122.05, 112.64, 83.16, 27.57 ppm. HRMS (ESI) calcd. for [C<sub>25</sub>H<sub>17</sub>NO<sub>4</sub>S+Na]<sup>+</sup> 478.1084, found 478.1092.

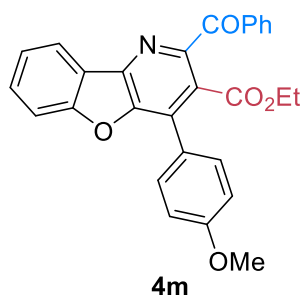

**Ethyl 2-benzoyl-4-(4-methoxyphenyl)benzofuro[3,2-*b*]pyridine-3-carboxylate (4m):**

Through general procedure B: Ethyl bromoacetate-DMAP salt (30.2 mg, 0.105 mmol, 1.05 equiv), Cs<sub>2</sub>CO<sub>3</sub> (130 mg, 0.4 mmol, 4.0 equiv) and *N*-((*Z*)-2-((*Z*)-4-methoxybenzylidene)benzofuran-3(*2H*)-ylidene)-4-methylbenzenesulfonamide **1b** (40.5 mg, 0.1 mmol, 1.0 equiv) were dissolved in dry acetonitrile (2.0 mL) and were stirred at 40 °C until **1b** disappeared. 2-bromo-1-phenylethan-1-one (29.9 mg, 0.15 mmol, 1.5 equiv) was added and stirred for 20 hours. After completion, purification by flash chromatography on silica gel (PE: EtOAc = 10: 1) gave product **4m**: 26.1 mg (0.058 mmol), as a white solid, yield 58%. M.p. = 146–148 °C. <sup>1</sup>H NMR (600 MHz, CDCl<sub>3</sub>) δ 8.23 (dd, *J* = 7.8, 1.1 Hz, 1H), 8.14–8.08 (m, 2H), 7.67–7.56 (m, 5H), 7.52 (t, *J* = 7.8 Hz, 2H), 7.46 (ddd, *J* = 8.0, 5.7, 2.3 Hz, 1H), 7.09 (d, *J* = 1.9 Hz, 1H), 7.08 (d, *J* = 2.2 Hz, 1H), 4.13 (q, *J* = 7.1 Hz, 2H), 3.90 (s, 3H), 1.04 (t, *J* = 7.1 Hz, 3H) ppm. <sup>13</sup>C NMR (150 MHz, CDCl<sub>3</sub>) δ

193.52, 167.08, 160.51, 158.83, 151.24, 147.64, 143.66, 136.02, 133.33, 132.71, 131.14, 130.78, 130.29, 128.25, 127.73, 124.13, 123.69, 122.76, 122.15, 114.15, 112.55, 61.95, 55.39, 13.55 ppm. HRMS (ESI) calcd. for  $[C_{28}H_{21}NO_5+Na]^+$  474.1312, found 474.1315.

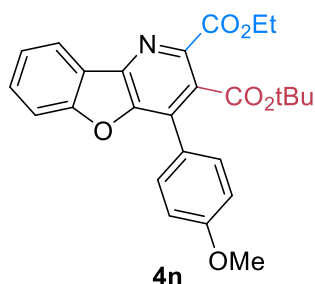

### 3-(*Tert*-butyl) 2-ethyl 4-(4-methoxyphenyl)benzofuro[3,2-*b*]pyridine-2,3-dicarboxylate (**4n**):

Through general procedure B: *Tert*-Butyl bromoacetate -DMAP salt (33.2 mg, 0.105 mmol, 1.05 equiv),  $Cs_2CO_3$  (130 mg, 0.4 mmol, 4.0 equiv) and *N*-((*Z*)-2-((*Z*)-4-methoxybenzylidene)benzofuran-3(2*H*)-ylidene)-4-methylbenzenesulfonamide **1b** (40.5mg, 0.1 mmol, 1.0 equiv) were dissolved in dry acetonitrile (2.0 mL) and were stirred at 40 °C until **1b** disappeared. Ethyl bromoacetate (25.1 mg, 16.6  $\mu$ L, 0.15 mmol, 1.5 equiv) was added and stirred for 20 hours. After completion, purification by flash chromatography on silica gel (PE: EtOAc = 10: 1) gave product **4n**: 28.2 mg (0.063 mmol), as a white solid, yield 63%. M.p. = 141–142 °C.  $^1H$  NMR (600 MHz,  $CDCl_3$ )  $\delta$  8.36 (dd,  $J = 7.8, 1.3$  Hz, 1H), 7.62–7.56 (m, 2H), 7.54 (d,  $J = 1.7$  Hz, 1H), 7.53 (d,  $J = 2.3$  Hz, 1H), 7.47 (ddd,  $J = 8.1, 6.7, 1.4$  Hz, 1H), 7.07 (d,  $J = 1.7$  Hz, 1H), 7.06 (d,  $J = 2.3$  Hz, 1H), 4.54 (q,  $J = 7.1$  Hz, 2H), 3.90 (s, 3H), 1.49 (t,  $J = 7.1$  Hz, 3H), 1.36 (s, 9H) ppm.  $^{13}C$  NMR (150 MHz,  $CDCl_3$ )  $\delta$  165.54, 165.46, 160.40, 158.76, 148.42, 143.97, 142.83, 131.85, 130.96, 130.21, 130.20, 124.05, 123.50, 122.61, 122.45, 113.97, 112.43, 83.13, 62.39, 55.42, 27.69, 14.31 ppm. HRMS (ESI) calcd. for  $[C_{26}H_{25}NO_6+H]^+$  448.1755, found 448.1758.

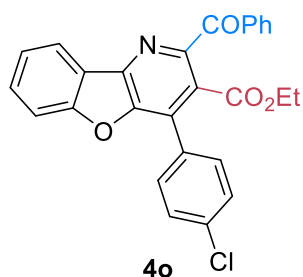

### Ethyl 2-benzoyl-4-(4-chlorophenyl)benzofuro[3,2-*b*]pyridine-3-carboxylate (**4o**):

Through general procedure B: Ethyl bromoacetate -DMAP salt (30.2 mg, 0.105 mmol, 1.05 equiv),  $Cs_2CO_3$  (130 mg, 0.4 mmol, 4.0 equiv) and *N*-((*Z*)-2-((*Z*)-4-chlorobenzylidene)benzofuran-3(2*H*)-ylidene)-4-methylbenzenesulfonamide **1c** (40.9 mg, 0.1 mmol, 1.0 equiv) were dissolved in dry acetonitrile (2.0 mL) and were stirred at 40 °C until **1c** disappeared.

2-bromo-1-phenylethan-1-one (29.9 mg, 0.15 mmol, 1.5 equiv) was added and stirred for 20 hours. After completion, purification by flash chromatography on silica gel (PE: EtOAc = 10: 1) gave product **4o**: 29.6 mg (0.065 mmol), as a white solid, yield 65%. M.p. = 151–152 °C. <sup>1</sup>H NMR (600 MHz, CDCl<sub>3</sub>) δ 8.24 (d, *J* = 7.7 Hz, 1H), 8.09 (dd, *J* = 8.2, 1.4 Hz, 2H), 7.66–7.60 (m, 3H), 7.57 (d, *J* = 8.6 Hz, 2H), 7.52 (dd, *J* = 15.1, 7.9 Hz, 4H), 7.47 (ddd, *J* = 8.0, 6.4, 1.7 Hz, 1H), 4.11 (q, *J* = 7.1 Hz, 2H), 1.01 (t, *J* = 7.2 Hz, 3H) ppm. <sup>13</sup>C NMR (150 MHz, CDCl<sub>3</sub>) δ 193.34, 166.59, 158.92, 151.46, 147.28, 144.00, 135.88, 135.69, 133.44, 131.71, 131.09, 130.68, 130.58, 130.08, 128.95, 128.30, 127.45, 124.33, 122.58, 122.25, 112.56, 62.11, 13.47 ppm. HRMS (ESI) calcd. for [C<sub>27</sub>H<sub>18</sub>ClNO<sub>4</sub>+Na]<sup>+</sup> 478.0816, found 478.0823.

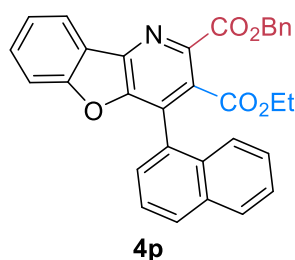

#### 2-Benzyl 3-ethyl 4-(naphthalen-1-yl)benzofuro[3,2-*b*]pyridine-2,3-dicarboxylate (**4p**) :

Through general procedure B: Ethyl bromoacetate-DABCO salt (29.2 mg, 0.105 mmol, 1.05 equiv), Cs<sub>2</sub>CO<sub>3</sub> (130 mg, 0.4 mmol, 4.0 equiv) and 4-methyl-*N*-((2*Z*,3*E*)-2-(naphthalen-1-ylmethylene)benzofuran-3(2*H*)-ylidene)benzenesulfonamide **1d** (42.5mg, 0.1 mmol, 1.0 equiv) were dissolved in dry acetonitrile (2.0 mL) and were stirred at 40 °C until **1d** disappeared. Benzyl bromoacetate (34.4 mg, 23.8 μL, 0.15 mmol, 1.5 equiv) was added and stirred for 20 hours. After completion, purification by flash chromatography on silica gel (PE: EtOAc = 10: 1) gave product **4p**: 35.1 mg (0.070 mmol), as a white solid, yield 70%. M.p. = 165–166 °C. <sup>1</sup>H NMR (600 MHz, CDCl<sub>3</sub>) δ 8.40 (d, *J* = 7.8 Hz, 1H), 8.08 (s, 1H), 8.00 (d, *J* = 8.4 Hz, 1H), 7.92 (dd, *J* = 11.8, 7.8 Hz, 2H), 7.67 (dd, *J* = 8.5, 1.8 Hz, 1H), 7.62 (t, *J* = 7.8 Hz, 1H), 7.58 (t, *J* = 7.0 Hz, 3H), 7.54–7.47 (m, 3H), 7.40 (t, *J* = 7.4 Hz, 2H), 7.35 (d, *J* = 7.2 Hz, 1H), 5.51 (s, 2H), 3.94 (q, *J* = 7.2 Hz, 2H), 0.88 (t, *J* = 7.1 Hz, 3H) ppm. <sup>13</sup>C NMR (150 MHz, CDCl<sub>3</sub>) δ 166.66, 165.05, 158.93, 148.34, 144.77, 142.39, 135.23, 133.42, 132.93, 132.05, 130.55, 129.46, 129.16, 128.70, 128.61, 128.58, 128.47, 128.42, 128.35, 127.86, 127.19, 126.77, 126.37, 124.28, 122.58, 122.48, 112.51, 68.08, 61.92, 13.57 ppm. HRMS (ESI) calcd. for [C<sub>32</sub>H<sub>23</sub>NO<sub>5</sub>+Na]<sup>+</sup> 524.1468, found 524.1472.

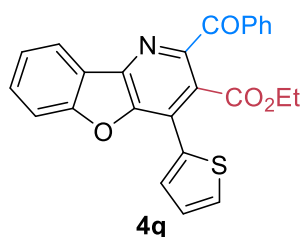

#### Ethyl 2-benzoyl-4-(thiophen-2-yl)benzofuro[3,2-*b*]pyridine-3-carboxylate (**4q**):

Through general procedure B: Ethyl bromoacetate-DABCO salt (29.2 mg, 0.105 mmol, 1.05 equiv), Cs<sub>2</sub>CO<sub>3</sub> (130 mg, 0.4 mmol, 4.0 equiv) and 4-methyl-*N*-((2*Z*,3*Z*)-2-(thiophen-2-ylmethylene)benzofuran-3(2*H*)-ylidene)benzenesulfonamide **1e** (38.1 mg, 0.1 mmol, 1.0 equiv) were dissolved in dry acetonitrile (2.0 mL) and were stirred at 40 °C until **1e** disappeared. 2-bromo-1-phenylethan-1-one (29.9 mg, 0.15 mmol, 1.5 equiv) was added and stirred for 20 hours. After completion, purification by flash chromatography on silica gel (PE: EtOAc = 10: 1) gave product **4q**: 25.6 mg (0.060 mmol), as a white solid, yield 60%. M.p. = 139–141 °C. <sup>1</sup>H NMR (600 MHz, CDCl<sub>3</sub>) δ 8.21 (d, *J* = 7.8 Hz, 1H), 8.09 (dd, *J* = 8.1, 1.6 Hz, 2H), 7.68–7.59 (m, 5H), 7.50 (t, *J* = 7.8 Hz, 2H), 7.48–7.43 (m, 1H), 7.24 (dd, *J* = 5.2, 3.8 Hz, 1H), 4.25 (q, *J* = 7.2 Hz, 2H), 1.14 (t, *J* = 7.2 Hz, 3H) ppm. <sup>13</sup>C NMR (150 MHz, CDCl<sub>3</sub>) δ 193.24, 167.02, 158.74, 150.62, 146.94, 143.72, 136.02, 133.32, 131.22, 131.17, 130.61, 130.44, 129.27, 128.21, 127.62, 127.44, 125.83, 124.32, 122.66, 122.16, 112.58, 62.24, 13.55 ppm. HRMS (ESI) calcd. for [C<sub>25</sub>H<sub>17</sub>NO<sub>4</sub>S+Na]<sup>+</sup> 450.0770, found 450.0777.

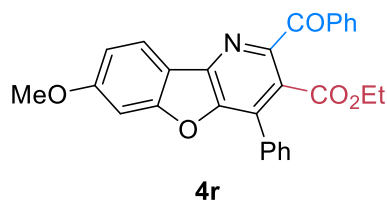

#### **Ethyl 2-benzoyl-7-methoxy-4-phenylbenzofuro[3,2-*b*]pyridine-3-carboxylate (**4r**):**

Through general procedure B: Ethyl bromoacetate-DABCO salt (29.2 mg, 0.105 mmol, 1.05 equiv), Cs<sub>2</sub>CO<sub>3</sub> (130 mg, 0.4 mmol, 4.0 equiv) and *N*-((*Z*)-2-((*Z*)-benzylidene)-6-methoxybenzofuran-3(2*H*)-ylidene)-4-methylbenzenesulfonamide **1f** (40.5 mg, 0.1 mmol, 1.0 equiv) were dissolved in dry acetonitrile (2.0 mL) and were stirred at 40 °C until **1f** disappeared. 2-bromo-1-phenylethan-1-one (29.9 mg, 0.15 mmol, 1.5 equiv) was added and stirred for 20 hours. After completion, purification by flash chromatography on silica gel (PE: EtOAc = 10: 1) gave product **4r**: 30.2 mg (0.067 mmol), as a white solid, yield 67%. M.p. = 145–147 °C. <sup>1</sup>H NMR (600 MHz, CDCl<sub>3</sub>) δ 8.12–8.07 (m, 3H), 7.66–7.58 (m, 3H), 7.57–7.48 (m, 5H), 7.10 (d, *J* = 2.2 Hz, 1H), 7.04 (dd, *J* = 8.7, 2.2 Hz, 1H), 4.06 (q, *J* = 7.1 Hz, 2H), 3.91 (s, 3H), 0.94 (t, *J* = 7.1 Hz, 3H) ppm. <sup>13</sup>C NMR (150 MHz, CDCl<sub>3</sub>) δ 193.66, 166.90, 162.41, 160.72, 151.40, 147.37, 144.25, 136.03, 133.31, 132.27, 131.89, 131.06, 129.25, 129.23, 128.56, 128.25, 126.30, 122.71, 115.53, 113.19, 96.63, 61.83, 55.87, 13.39 ppm. HRMS (ESI) calcd. for [C<sub>28</sub>H<sub>21</sub>NO<sub>5</sub>+Na]<sup>+</sup> 474.1312, found 474.1310.

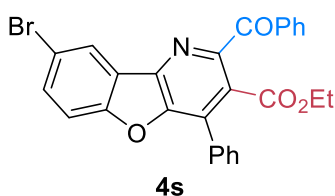

#### Ethyl 2-benzoyl-8-bromo-4-phenylbenzofuro[3,2-*b*]pyridine-3-carboxylate (**4s**):

Through general procedure B: Ethyl bromoacetate -DABCO salt (29.2 mg, 0.105 mmol, 1.05 equiv), Cs<sub>2</sub>CO<sub>3</sub> (130 mg, 0.4 mmol, 4.0 equiv) and *N*-((*Z*)-2-((*Z*)-benzylidene)-5-bromobenzofuran-3(*2H*)-ylidene)-4-methylbenzenesulfonamide **1g** (45.3 mg, 0.1 mmol, 1.0 equiv) were dissolved in dry acetonitrile (2.0 mL) and were stirred at 40 °C until **1g** disappeared. 2-bromo-1-phenylethan-1-one (29.9 mg, 0.15 mmol, 1.5 equiv) was added and stirred for 20 hours. After completion, purification by flash chromatography on silica gel (PE: EtOAc = 10: 1) gave product **4s**: 33.4 mg (0.067 mmol), as a white solid, yield 67%. M.p. = 155–157 °C. <sup>1</sup>H NMR (600 MHz, CDCl<sub>3</sub>) δ 8.38 (d, *J* = 2.1 Hz, 1H), 8.13–8.05 (m, 2H), 7.71 (dd, *J* = 8.8, 2.1 Hz, 1H), 7.65 (d, *J* = 7.4 Hz, 1H), 7.61 (dd, *J* = 7.6, 2.0 Hz, 2H), 7.58–7.49 (m, 6H), 4.10 (q, *J* = 7.1 Hz, 2H), 0.97 (t, *J* = 7.1 Hz, 3H) ppm. <sup>13</sup>C NMR (150 MHz, CDCl<sub>3</sub>) δ 93.23, 166.59, 157.51, 151.64, 148.03, 142.44, 135.82, 133.47, 133.37, 133.16, 131.35, 131.09, 129.56, 129.21, 128.67, 128.54, 128.31, 124.92, 124.62, 117.30, 114.15, 62.03, 13.41 ppm. HRMS (ESI) calcd. for [C<sub>27</sub>H<sub>18</sub>BrNO<sub>4</sub>+Na]<sup>+</sup> 522.0311, found 522.0315.

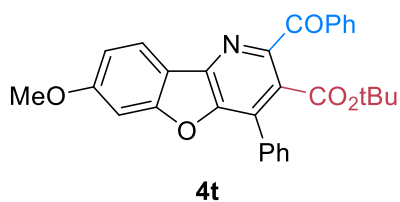

#### *Tert*-butyl 2-benzoyl-7-methoxy-4-phenylbenzofuro[3,2-*b*]pyridine-3-carboxylate (**4t**):

Through general procedure B: *Tert*-Butyl bromoacetate-DMAP salt (33.2 mg, 0.105 mmol, 1.05 equiv), Cs<sub>2</sub>CO<sub>3</sub> (130 mg, 0.4 mmol, 4.0 equiv) and *N*-((*Z*)-2-((*Z*)-benzylidene)-6-methoxybenzofuran-3(*2H*)-ylidene)-4-methylbenzenesulfonamide **1f** (40.5 mg, 0.1 mmol, 1.0 equiv) were dissolved in dry acetonitrile (2.0 mL) and were stirred at 40 °C until **1f** disappeared. 2-bromo-1-phenylethan-1-one (29.9 mg, 0.15 mmol, 1.5 equiv) was added and stirred for 20 hours. After completion, purification by flash chromatography on silica gel (PE: EtOAc = 10: 1) gave product **4t**: 31.1 mg (0.065 mmol), as a white solid, yield 65%. M.p. = 149–151 °C. <sup>1</sup>H NMR (600 MHz, CDCl<sub>3</sub>) δ 8.10 (d, *J* = 8.7 Hz, 1H), 8.07–8.04 (m, 2H), 7.63–7.58 (m, 3H), 7.57–7.52 (m, 3H), 7.50 (t, *J* = 7.7 Hz, 2H), 7.08 (d, *J* = 2.1 Hz, 1H), 7.03 (dd, *J* = 8.6, 2.2 Hz, 1H), 3.90 (s, 3H), 1.18 (s, 9H) ppm. <sup>13</sup>C NMR (150 MHz, CDCl<sub>3</sub>) δ 193.91, 165.53, 162.29, 160.65, 151.75, 147.35, 143.97, 136.19, 133.30, 132.15, 132.12, 130.91, 129.38, 129.11, 128.48, 128.30, 127.11, 122.69, 115.58, 113.07, 96.62, 83.09, 55.85, 27.31 ppm. HRMS (ESI) calcd. for [C<sub>30</sub>H<sub>25</sub>NO<sub>5</sub>+H]<sup>+</sup> 480.1806,

found 480.1811.

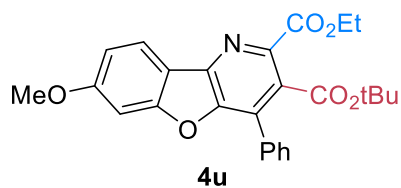

### 3-(*Tert*-butyl) 2-ethyl 7-methoxy-4-phenylbenzofuro[3,2-*b*]pyridine-2,3-dicarboxylate (**4u**):

Through general procedure B: *Tert*-Butyl bromoacetate-DMAP salt (33.2 mg, 0.105 mmol, 1.05 equiv), Cs<sub>2</sub>CO<sub>3</sub> (130 mg, 0.4 mmol, 4.0 equiv) and *N*-((*Z*)-2-((*Z*)-benzylidene)-6-methoxybenzofuran-3(*2H*)-ylidene)-4-methylbenzenesulfonamide **1f** (40.5 mg, 0.1 mmol, 1.0 equiv) were dissolved in dry acetonitrile (2.0 mL) and were stirred at 40 °C until **1f** disappeared. Ethyl bromoacetate (25.1 mg, 16.6 μL, 0.15 mmol, 1.5 equiv) was added and stirred for 20 hours. After completion, purification by flash chromatography on silica gel (PE: EtOAc = 10: 1) gave product **4u**: 31.7 mg (0.071 mmol), as a white solid, yield 71%. M.p. = 149–151 °C. <sup>1</sup>H NMR (600 MHz, CDCl<sub>3</sub>) δ 8.24–8.19 (m, 1H), 7.58–7.49 (m, 5H), 7.05 (d, *J* = 8.1 Hz, 2H), 4.53 (q, *J* = 7.1 Hz, 2H), 3.88 (s, 3H), 1.48 (t, *J* = 7.1 Hz, 3H), 1.29 (s, 9H) ppm. <sup>13</sup>C NMR (150 MHz, CDCl<sub>3</sub>) δ 165.56, 165.45, 162.29, 160.61, 148.11, 144.45, 142.71, 131.60, 131.33, 129.50, 129.17, 128.91, 128.44, 122.99, 115.39, 112.97, 96.60, 82.97, 62.36, 55.82, 27.56, 14.29 ppm. HRMS (ESI) calcd. for [C<sub>26</sub>H<sub>25</sub>NO<sub>6</sub>+H]<sup>+</sup> 448.1755, found 448.1759.

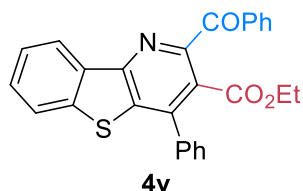

### Ethyl 2-benzoyl-4-phenylbenzo[4,5]thieno[3,2-*b*]pyridine-3-carboxylate (**4v**):

Through general procedure B: Ethyl bromoacetate-DMAP salt (30.2 mg, 0.105 mmol, 1.05 equiv), Cs<sub>2</sub>CO<sub>3</sub> (130 mg, 0.4 mmol, 4.0 equiv) and *N*-((*Z*)-2-((*Z*)-benzylidene)benzo[*b*]thiophen-3(*2H*)-ylidene)-4-methylbenzenesulfonamide **1h** (39.1 mg, 0.1 mmol, 1.0 equiv) were dissolved in dry acetonitrile (2.0 mL) and were stirred at 40 °C until **1h** disappeared. 2-bromo-1-phenylethan-1-one (29.9 mg, 0.15 mmol, 1.5 equiv) was added and stirred for 20 hours. After completion, purification by flash chromatography on silica gel (PE: EtOAc = 10: 1) gave product **4v**: 28.4 mg (0.065 mmol), as a white solid, yield 65%. M.p. = 144–145 °C. <sup>1</sup>H NMR (600 MHz, CDCl<sub>3</sub>) δ 8.46 (d, *J* = 7.9 Hz, 1H), 8.17 (d, *J* = 7.7 Hz, 2H), 7.84 (d, *J* = 8.0 Hz, 1H), 7.64 (t, *J* = 7.4 Hz, 1H), 7.60 (t, *J* = 7.5 Hz, 1H), 7.54 (dd, *J* = 14.7, 4.7 Hz, 8H), 4.07 (q, *J* = 7.1 Hz, 2H), 0.94 (t, *J* = 7.1 Hz, 3H) ppm. <sup>13</sup>C NMR (150 MHz, CDCl<sub>3</sub>) δ 193.49, 167.01, 152.35, 151.28, 144.29, 141.34, 136.38, 136.28, 136.00, 134.35, 133.30, 131.19, 129.47, 129.40, 128.85, 128.20, 128.12, 126.49, 125.43, 124.15, 122.89, 61.79, 13.43 ppm. HRMS (ESI)

calcd. for  $[C_{27}H_{19}NO_4S+H]^+$  438.1158, found 438.1160

#### 4. (4 + 1 + 1') annulation at a 1.0 mmol scale

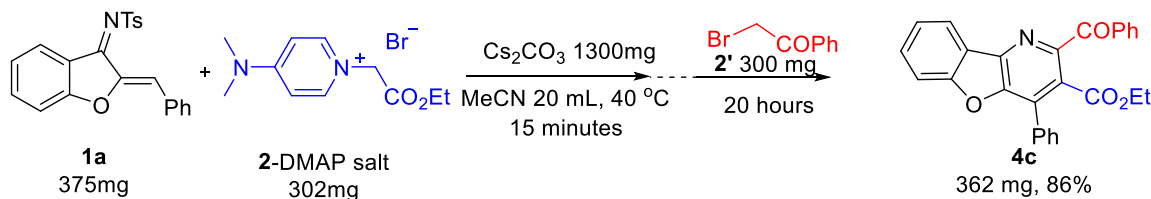

Ethyl bromoacetate-DMAP salt (302 mg, 1.05 mmol, 1.05 equiv),  $Cs_2CO_3$  (1.3 g, 4 mmol, 4.0 equiv) and 1-azadiene **1a** (375 mg, 1 mmol, 1.0 equiv) were dissolved in dry acetonitrile (20 mL) and were stirred at 40 °C until **1a** disappeared. 2-Bromoacetophenone (300 mg, 1.5 mmol, 1.5 equiv) was added and stirred for 20 hours. After completion, purification by flash chromatography on silica gel (PE: EtOAc: = 10: 1) gave product **4c**: 362 mg (0.86 mmol), as a white solid, yield 86%.

#### 5. Transformation of products **4c** and **4d**

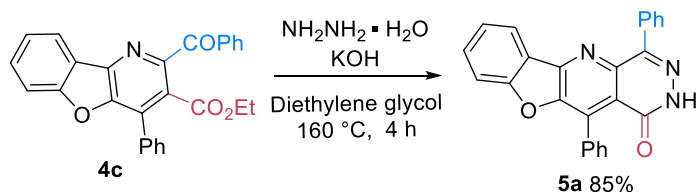

A solution of ethyl 2-benzoyl-4-phenylbenzofuro[3,2-*b*]pyridine-3-carboxylate **4c** (30 mg, 0.071 mmol, 1.0 equiv), KOH (16 mg, 0.28 mmol, 4.0 equiv) and 80% hydrazine hydrate (5.3 mg, 5.3  $\mu$ L, 0.085 mmol, 1.2 equiv) in diethylene glycol (4.0 mL) was stirred at 160 °C for 4 h. After completion,  $H_2O$  (5.0 mL) was added and extracted with toluene (5.0 mL). The organic phase was washed with water (5.0 mL) three times and purified by flash chromatography on silica gel (PE: EtOAc = 10: 1) gave product **5a**: 23.5 mg (0.060 mmol), as a yellow solid, yield 85%; M.p. = 163–165 °C;  $^1H$  NMR (600 MHz, Chloroform- $d_1$  : Toluene- $d_8$  : Methanol- $d_4$  = 4:1:1)  $\delta$  9.26 (dd,  $J$  = 7.9, 1.3 Hz, 1H), 9.06–9.02 (m, 2H), 8.61 (td,  $J$  = 7.7, 7.1, 1.3 Hz, 1H), 8.57 (dd,  $J$  = 8.2, 6.5 Hz, 2H), 8.56–8.49 (m, 7H), 8.43 (t,  $J$  = 7.5 Hz, 1H) ppm;  $^{13}C$  NMR (150 MHz, Chloroform- $d_1$  : Toluene- $d_8$  : Methanol- $d_4$  = 4:1:1)  $\delta$  (ppm) 157.08, 156.02, 145.39, 144.66, 144.29, 139.99, 131.23, 129.44, 128.65, 128.18, 126.68, 125.34, 125.17, 124.74, 124.05, 123.96, 120.42, 119.07, 118.40, 116.30, 108.78 ppm; HRMS (ESI) calcd. for  $[C_{25}H_{15}N_3O_2 + Na]^+$  412.1057, found 412.1060.



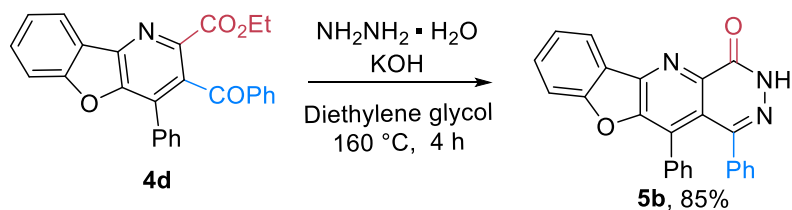

A solution of ethyl 3-benzoyl-4-phenylbenzofuro[3,2-*b*]pyridine-2-carboxylate **4d** (30 mg, 0.071 mmol, 1.0 equiv), KOH (16 mg, 0.28 mmol, 4.0 equiv) and 80% hydrazine hydrate (5.3 mg, 5.3  $\mu\text{L}$ , 0.085 mmol, 1.2 equiv) in diethylene glycol (4.0 mL) was stirred at 160  $^\circ\text{C}$  for 4 h. After completion,  $\text{H}_2\text{O}$  (5.0 mL) was added and extracted with toluene (5.0 mL). The organic phase was washed with water (5.0 mL) three times and purified by flash chromatography on silica gel (PE: EtOAc = 10: 1) gave product **5b**: 23.5 mg (0.060 mmol), as a yellow solid, yield 85%; M.p. = 163–164  $^\circ\text{C}$ ;  $^1\text{H}$  NMR (600 MHz,  $\text{DMF-}d_7$ )  $\delta$  13.40 (s, 1H), 8.66 (d,  $J = 7.7$  Hz, 1H), 7.99 (dt,  $J = 15.9, 8.0$  Hz, 2H), 7.83 (t,  $J = 7.3$  Hz, 1H), 7.56–7.52 (m, 2H), 7.40–7.35 (m, 2H), 7.32 (dd,  $J = 5.2, 1.9$  Hz, 3H), 7.18 (dt,  $J = 14.7, 7.2$  Hz, 3H) ppm;  $^{13}\text{C}$  NMR (150 MHz,  $\text{DMF-}d_7$ )  $\delta$  163.91, 163.13, 153.91, 151.67, 146.85, 142.22, 136.32, 135.41, 135.08, 133.81, 132.68, 132.03, 131.74, 131.67, 129.20, 127.40, 126.90, 126.80, 126.79, 117.06 ppm; HRMS (ESI) calcd. for  $[\text{C}_{25}\text{H}_{15}\text{N}_3\text{O}_2 + \text{Na}]^+$  412.1057, found 412.1061.

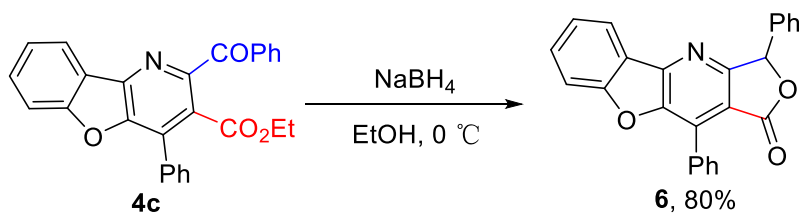

Ethyl 2-benzoyl-4-phenylbenzofuro[3,2-*b*]pyridine-3-carboxylate (**4c**, 21 mg, 0.05 mmol, 1.0 equiv) was dissolved in ethanol (1.0 mL). Sodium borohydride (37.8 mg, 0.1 mmol, 2.0 equiv) was added slowly under ice bath conditions. Monitor the reaction by TLC until the substrate disappeared. Quenched with ice water and extracted with DCM. The organic phase was concentrated, and purified by flash chromatography on silica gel (PE: EtOAc = 5: 1) gave product **6**: 15.0 mg (0.043 mmol), as a white solid, yield 80%. M.p. = 150–151  $^\circ\text{C}$ .  $^1\text{H}$  NMR (600 MHz,  $\text{CDCl}_3$ )  $\delta$  8.27 (d,  $J = 7.8$  Hz, 1H), 7.93 – 7.88 (m, 2H), 7.65 (d,  $J = 7.4$  Hz, 1H), 7.62 (dq,  $J = 10.9, 6.7, 6.0$  Hz, 4H), 7.56 (d,  $J = 7.5$  Hz, 2H), 7.47 (t,  $J = 7.4$  Hz, 1H), 7.44 (t,  $J = 7.4$  Hz, 2H), 7.40 (d,  $J = 7.1$  Hz, 1H), 6.54 (s, 1H) ppm.  $^{13}\text{C}$  NMR (150 MHz,  $\text{CDCl}_3$ )  $\delta$  167.80, 165.39, 159.60, 150.45, 147.33, 135.70, 133.40, 131.45, 130.89, 130.32, 129.12, 128.82, 128.32, 128.17, 127.06, 124.18, 122.64, 122.22, 113.06, 112.68, 81.30 ppm. HRMS (ESI) calcd. for  $[\text{C}_{25}\text{H}_{15}\text{NO}_3 + \text{Na}]^+$  400.0944, found 400.0948.



## 6. Crystal data and structural refinement for product 4d

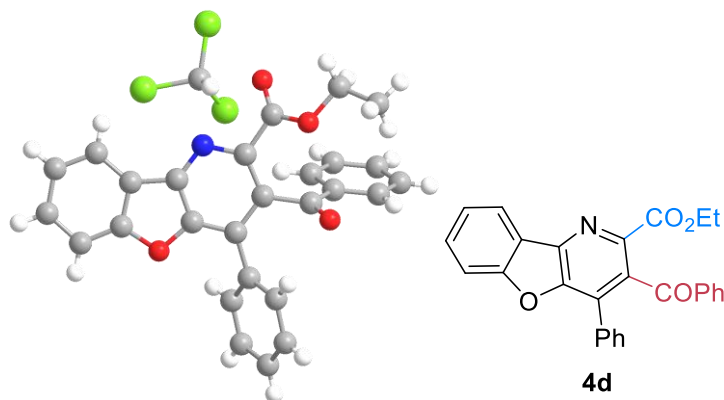

### Datablock: 4d

|                                                               |                                                                        |                                                                        |                                     |
|---------------------------------------------------------------|------------------------------------------------------------------------|------------------------------------------------------------------------|-------------------------------------|
| Bond precision                                                | C-C = 0.0050 Å                                                         | Wavelength = 0.71073                                                   |                                     |
| Cell                                                          | a = 10.4027(7)<br>alpha = 87.255(6)                                    | b = 11.0987(7)<br>beta = 73.730(6)                                     | c = 12.0924(9)<br>gamma = 70.545(6) |
| Temperature: 150K                                             |                                                                        |                                                                        |                                     |
|                                                               | Calculated                                                             | Reported                                                               |                                     |
| Volume                                                        | 1262.12(16)                                                            | 1262.12(16)                                                            |                                     |
| Space group                                                   | P -1                                                                   | P -1                                                                   |                                     |
| Hall group                                                    | -P 1                                                                   | -P 1                                                                   |                                     |
| Moiety formula                                                | C <sub>27</sub> H <sub>19</sub> N O <sub>4</sub> , C H Cl <sub>3</sub> | C H Cl <sub>3</sub> , C <sub>27</sub> H <sub>19</sub> N O <sub>4</sub> |                                     |
| Sum formula                                                   | C <sub>28</sub> H <sub>20</sub> Cl <sub>3</sub> N O <sub>4</sub>       | C <sub>28</sub> H <sub>20</sub> Cl <sub>3</sub> N O <sub>4</sub>       |                                     |
| Mr                                                            | 540.80                                                                 | 540.80                                                                 |                                     |
| Dx, g/cm <sup>-3</sup>                                        | 1.423                                                                  | 1.423                                                                  |                                     |
| Z                                                             | 2                                                                      | 2                                                                      |                                     |
| Mu (mm <sup>-1</sup> )                                        | 0.399                                                                  | 0.399                                                                  |                                     |
| F000                                                          | 556.0                                                                  | 556.0                                                                  |                                     |
| F000'                                                         | 557.11                                                                 |                                                                        |                                     |
| h, k, lmax                                                    | 14,15,16                                                               | 13,14,16                                                               |                                     |
| Nref                                                          | 6713                                                                   | 5743                                                                   |                                     |
| Tmin, Tmax                                                    | 0.880,0.887                                                            | 0.883,1.000                                                            |                                     |
| Tmin'                                                         | 0.880                                                                  |                                                                        |                                     |
| Correction method= # Reported T Limits: Tmin=0.883 Tmax=1.000 |                                                                        |                                                                        |                                     |
| AbsCorr = MULTI-SCAN                                          |                                                                        |                                                                        |                                     |
| Data completeness=0.856                                       |                                                                        | Theta(max)= 28.999                                                     |                                     |
| R(reflections)= 0.0739( 4071)                                 |                                                                        | wR2(reflections)= 0.2279( 5743)                                        |                                     |
| S= 1.034                                                      | Napr = 326                                                             |                                                                        |                                     |

PLATON-Mar 19 04:02:37 2021 - (51220)

Z 142

20210309-wz436

P -1

R = 0.07

RES= 0 -93 X

Prob = 50  
Temp = 150

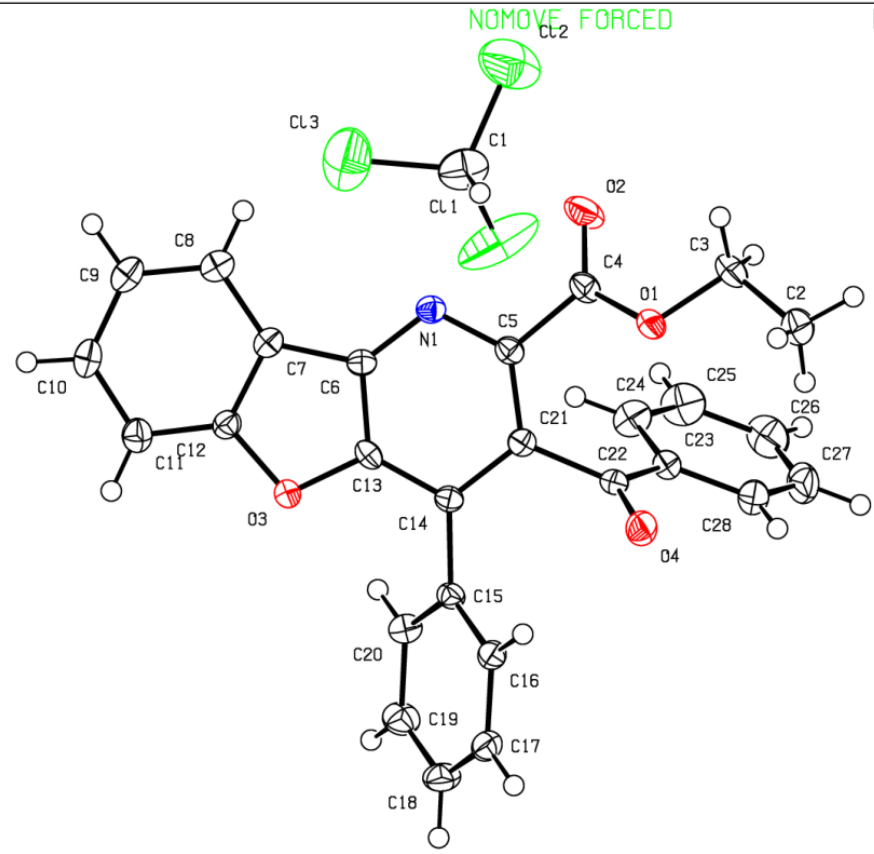

## 7. Mechanistic study by computational calculations

In this article, all calculations were performed by Gaussian 09 software packages.<sup>[2]</sup> The conformations of intermediates were generated by SYBYL-X 2.0 GA Conf. search module and manual adjustment.<sup>[3]</sup> The recently developed M06-2X functional<sup>[4]</sup> together with the standard 6-31G(d) basis set,<sup>[5]</sup> were used for optimizing the geometry of all the minima and transition states. The optimized structures or transition structures were confirmed by normal vibrational mode analysis. The optimized structures were no imaginary frequency but transition structure had only one imaginary frequency. Transition structures were also verified by intrinsic reaction coordinate (IRC) calculations<sup>[6]</sup> or vibration direction. Considering the influence of solvation effect, SMD implicit solvent model<sup>[7]</sup> was used at M06-2X/6-311++G (2d, p) theoretical level<sup>[8]</sup> to obtain high accuracy single point energy in acetonitrile. This method has been applied successfully to investigate the mechanisms of several organic reaction, which is generally considered to be more accurate for energetic. Solution-phase single-point energies corrected by the gas-phase Gibbs free energy corrections were used to describe all the reaction energetics. All energies reported throughout the text are in kcal/mol, and the bond length unit is angstroms (Å). Structures were generated by GaussView 6<sup>[9]</sup> and CYL view.<sup>[10]</sup>

To gain more sight into the (4 + 1 + 1) annulation reaction, we carried out DFT calculations on the (4 + 1 + 1) annulation between **1a** and **2a** under the assist of DABCO and Cs<sub>2</sub>CO<sub>3</sub> as a model reaction.

### 7.1. Formation of ylides

The core step in the formation of *N*-ylides is S<sub>N</sub>2 nucleophilic substitution by DABCO to **2a** (Figure S1). The activation energy of **N-TS1** is 18.0 kcal/mol. Subsequently, the ammonium salt is deprotonated into *N*-ylide **N-INT2** by assistance of alkali. The relatively low energy of product (-32.2 kcal/mol) means that the formation of *N*-ylide is an irreversible process. It shows that **2a** can react with the same equivalent of DABCO, and the ammonium salt is its main form.

A similar calculation was performed by replacing DABCO with dimethyl sulfide (Figure S1). This process needs to cross the energy barrier of 25.8 kcal/mol via **S-TS1**. Then the sulfur salt is converted into sulfur ylide **S-INT2** by assistance of alkali. It should be noted that the control experiment used a pre-prepared sulfur salt **S-INT1** to participate in the reaction. In order to comprehensive comparison with *N*-ylide, the same in situ generation process was simulated in this calculation.

The relative energy of sulfur salt formation is much higher (25.8 kcal/mol vs. 18.0 kcal/mol), which means that the rate of sulfur salt formation is much lower than the rate of ammonium salt formation. This is why most of the *S*-ylide reactions using sulfur salts prepared in advance to

participate in the reaction, while *N*-ylide reaction can be processed using prepared ammonium salt as well as in situ generation one.

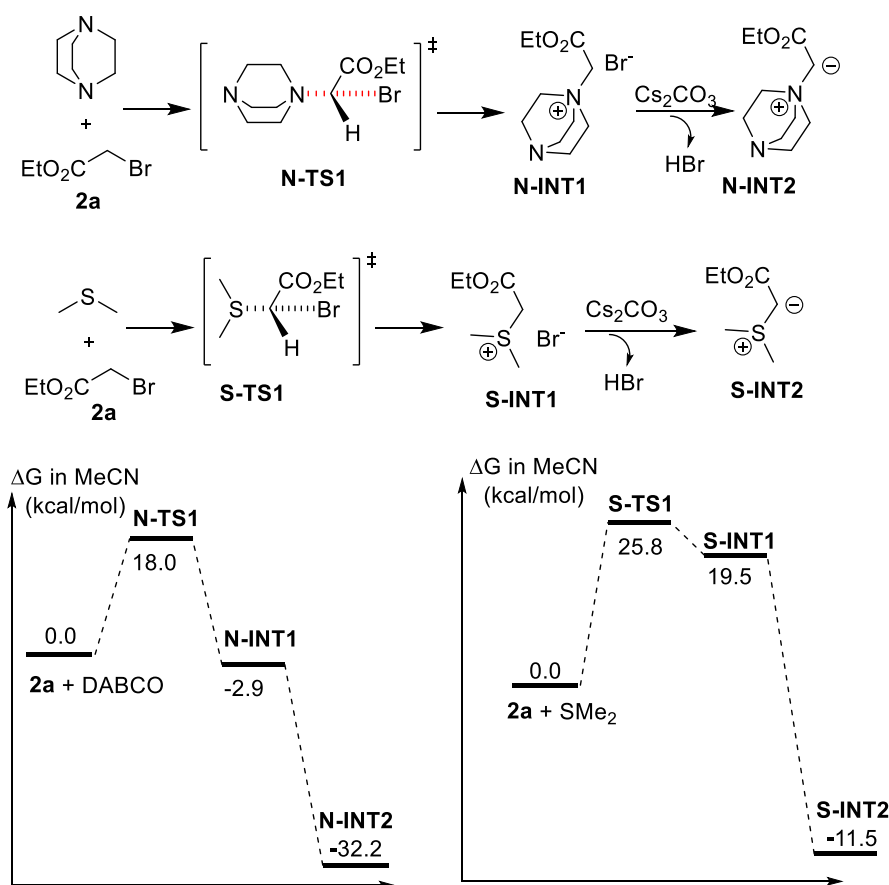

Figure S1. Gibbs free energy profile of ylides formation

## 7.2 [4 + 1] annulations

The cases where the newly formed ylides attack to **1a** in different orientations was examined (Figure S2). The Michael addition energy barrier for *N*-ylide (**N-TS2-SR** is 15.4 kcal/mol and **N-TS2-RR** is 15.2 kcal/mol) is significantly lower than that for *S*-ylide (**S-TS2-SR** is 23.0 kcal/mol and **S-TS2-RR** is 19.1 kcal/mol), showing better nucleophilic addition ability for *N*-ylide. However, the energy barrier of bond rotation and [4 + 1] ring-closure are completely opposite. The total energy barrier via **N-TS3-SR** and **N-TS3-RR** is 31.1 kcal/mol and 28.5 kcal/mol respectively. Such a high energy barrier obviously could not complete the [4 + 1] ring closure under normal conditions, which was also confirmed by the experimental results. For *S*-ylide, the total energy barrier via **S-TS3-SR** and **S-TS3-RR** is 19.5 kcal/mol and 15.2 kcal/mol respectively. This is also consistent with the fact that we only got the [4 + 1] product **7** in the *trans* configuration when reacted *S*-ylide to **1a**.

Such calculation results are also consistent with the calculation conclusions of Waser's group<sup>[11]</sup>, suggesting that the nucleophilicity of *N*-ylide may not be weaker than the *S*-ylide, but in

the final elimination cyclization step, the energy barrier required for *N*-ylide to eliminate cyclization is much higher than that for *S*-ylide. The above theoretical calculations well explain why the [4 + 1] cyclization reaction occurred with *S*-ylide and **1a**, but not for *N*-ylide.

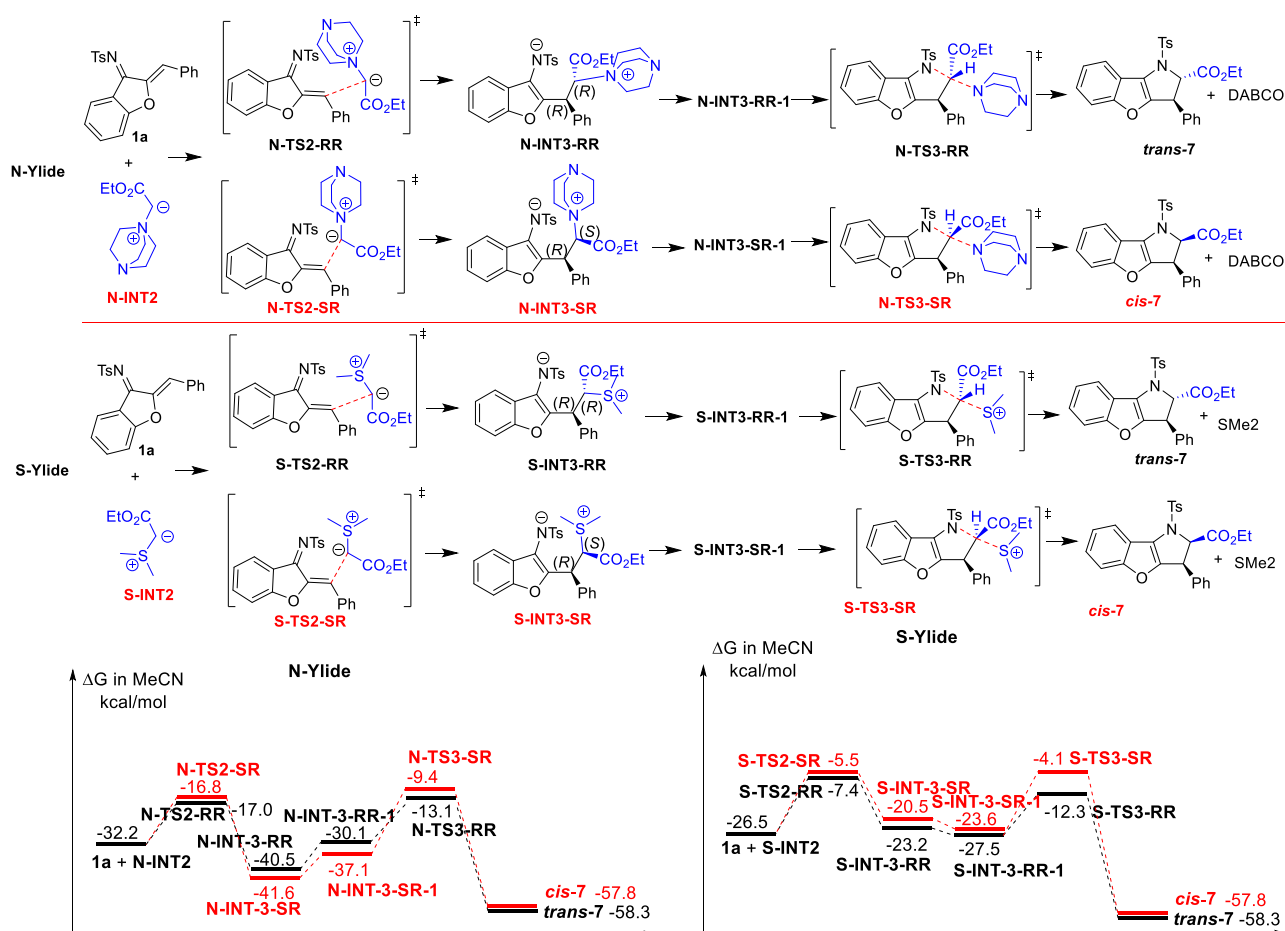

**Figure S2.** Gibbs free energy profile of Micheal additions and ring closures

### 7.3 The cyclopropane pathway

The cyclopropane pathway was also considered (Figure S3). **2a** becomes enol form **2a-1** with the assistance of carbonate anion via **2a-TS1**. Then **2a-1** is adducted to **1a** from different directions to generate **INT1-A** and **INT1-B**. We cannot rule out the possibility of generating cyclopropane intermediates, because the energy barriers of cyclopropane ring-closure is relatively low (**TS2-A**, **TS2-A-1**, **TS2-B**, **TS2-B-1**). However, we can exclude the cyclopropane ring closure process mediated by DABCO, because the energy barrier of DABCO-mediated S<sub>N</sub>2 substitution via **TS1-A** and **TS1-B** is as high as 38.8 kcal/mol and 46.3 kcal/mol respectively.

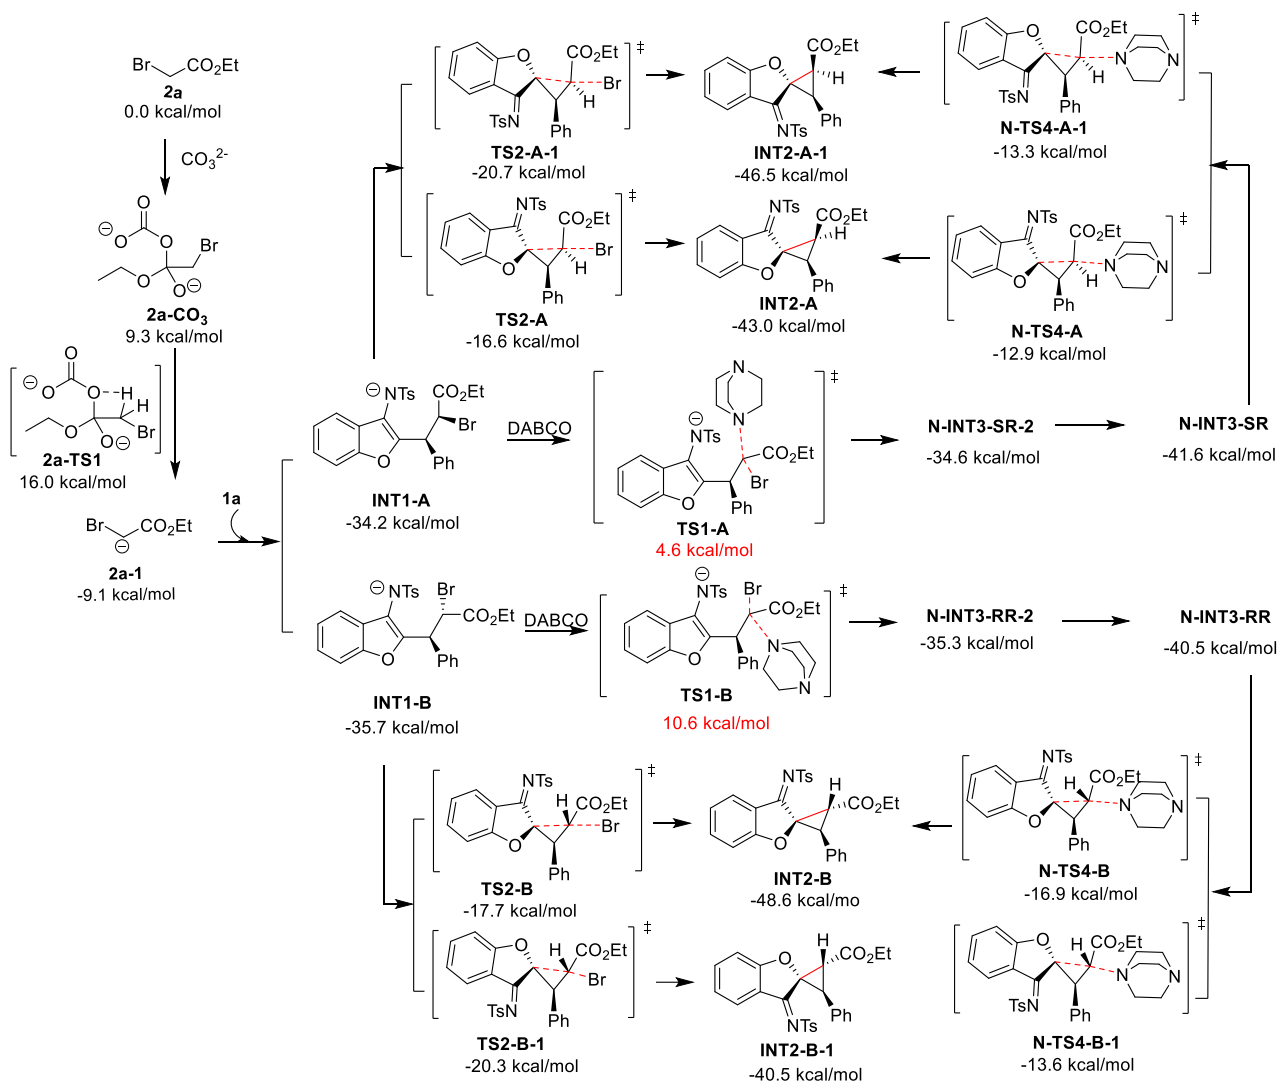

**Figure S3.** Gibbs free energy profile of formation of cyclopropane intermediate

Even assuming that the cyclopropane intermediate **INT2** has been formed, it is almost impossible to open the cyclopropane through the *N*-ylide. Eight configurations of the cyclopropane opening process were all calculated (Figure S4). The results show that the energy barrier of this process is 32.6 kcal/mol at least. Therefore, we can conclude that the mechanism of cyclopropane intermediate might be not reasonable.

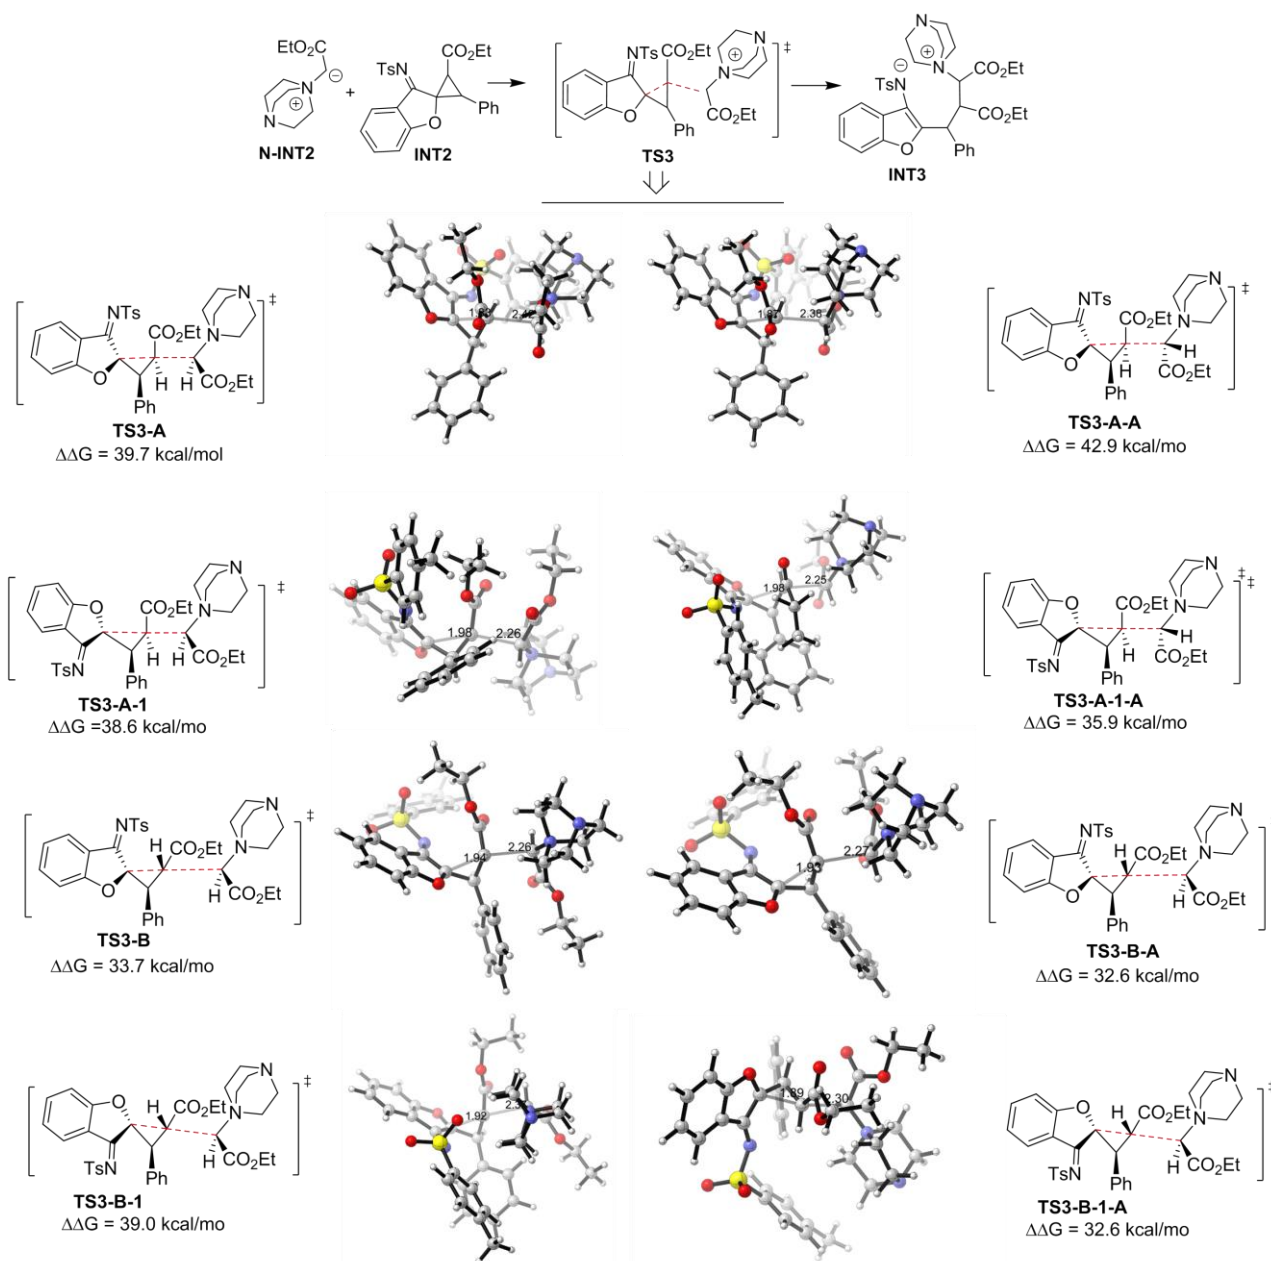

**Figure S4.** Gibbs free energy profile and transition structure of cyclopropane opening

#### 7.4 Hoffman Elimination Pathway

From the above calculation, we can know that **2a** was mainly combined with DABCO and exists in the form of ammonium salt. And *N*-ylide is easy to process Michael addition to **1a**. However, the Michael addition product **N-INT3** could not perform [4 + 1] or [2 + 1] ring closure at room temperature. Therefore, it must be other transformations of **N-INT3** created the unexpected (4 + 1 + 1) reaction.

From the quaternary ammonium salt and alkaline conditions, we think of the Hoffman elimination reaction. **N-INT3-RR** can easily be combined with  $\text{-CO}_3^{2-}$  to form **N-INT4** (Figure S5). Then the Hoffman elimination reaction occurs through **N-TS5** with the energy barrier of 6.2 kcal/mol. Next, the negative electron on the nitrogen is transferred to the terminal double bond to

attack to the free **2a** in the system. It is worth mentioning that as electrons are transferred on the conjugated double bond, **N-INT6** will have four different configurations. Among them, the lowest energy barrier is the process through **N-TS6-B** to afford **N-INT7**. **N-INT7** and DABCO are combined into **N-INT7-A**. Due to the acidity of the  $\alpha$ -position of the carbonyl group, DABCO can act as a base to assist the removal of  $H^+$  via **N-TS7-A** with the energy barrier of 11.8 kcal/mol. The fallen  $DABCOH^+$  stabilizes the substrate through hydrogen bonding. Subsequently, another  $\alpha$ -hydrogen abstraction occurs through **N-TS7-B** with the energy barrier of 8.6 kcal/mol, which is actually a formal 1,6-hydrogen transfer. Afterward, the chain conjugation system **N-INT9-B** could be generated after Ts-group elimination through **N-TS8-D** with the energy barrier of 24.8 kcal/mol. Then electrocyclization reaction can easily occur through the transition state **N-TS9** to afford **N-INT10** with the energy barrier of 15.9 kcal/mol. Then, **N-INT10** is subsequently oxidized by air to obtain the final product.

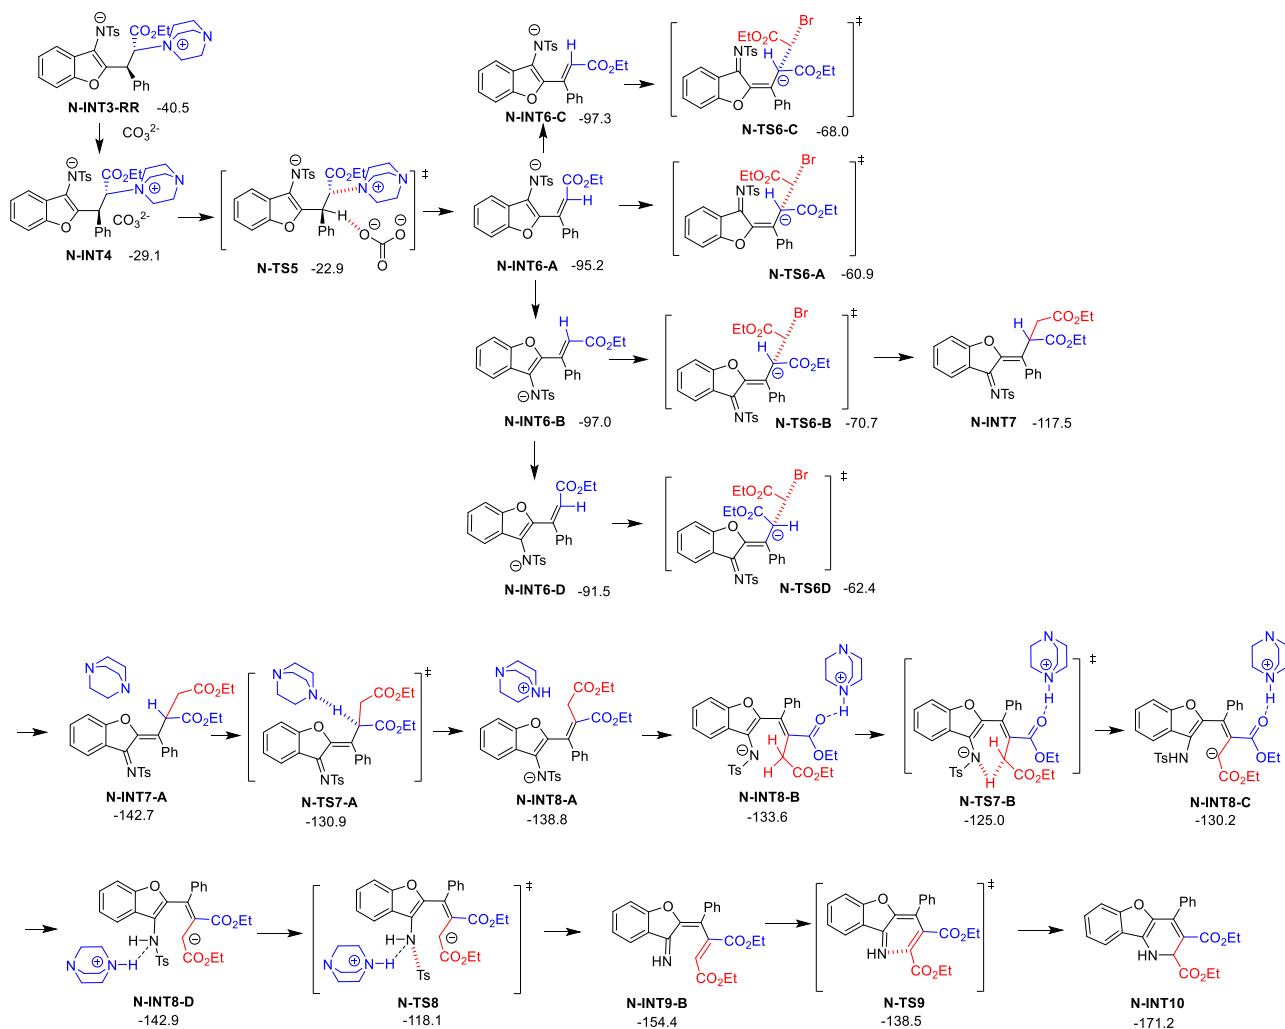

**Figure S5.** Gibbs free energy profile of Hoffman Elimination Pathway



## 8. NMR Spectra

PROTON\_01

8.401, 8.388, 7.618, 7.615, 7.606, 7.604, 7.601, 7.592, 7.590, 7.575, 7.562, 7.555, 7.552, 7.549, 7.544, 7.534, 7.527, 7.522, 7.515, 7.513, 7.489, 7.487, 7.475, 7.465, 7.463, 7.259, 4.172, 4.160, 4.148, 4.136, 1.686, 1.683, 1.681, 1.679, 1.649, 1.003, 0.992, 0.980

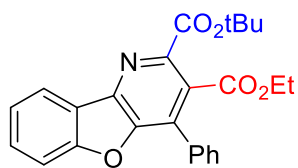

4a

<sup>1</sup>H NMR (600 MHz, CDCl<sub>3</sub>)

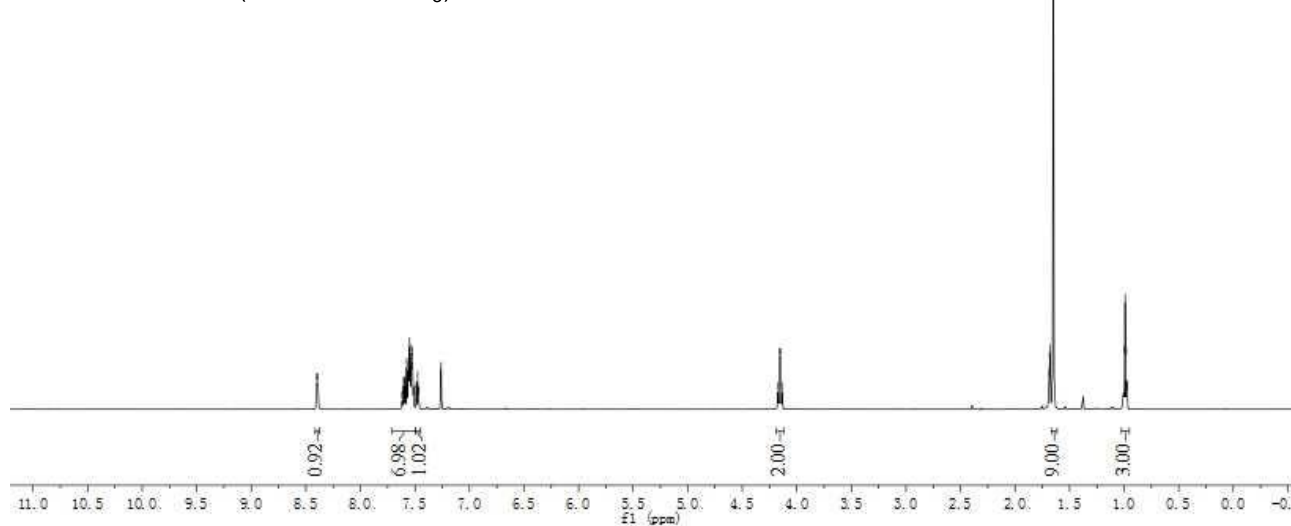

CARBON\_01

166.806, 164.205, 158.813, 147.770, 144.579, 144.125, 131.914, 131.569, 130.298, 129.329, 129.216, 128.550, 128.401, 124.100, 122.626, 122.576, 112.399, 83.398, 61.794, 27.942, 13.525

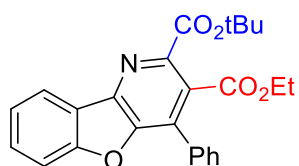

4a

<sup>13</sup>C NMR (150 MHz, CDCl<sub>3</sub>)

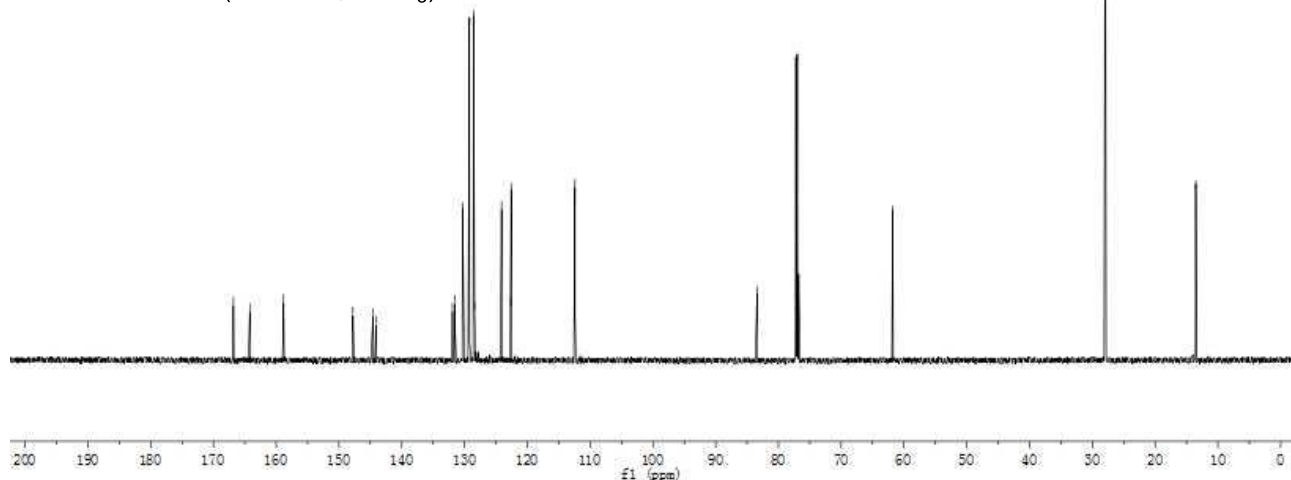

PROTON\_01

8.379  
8.366  
7.616  
7.613  
7.604  
7.602  
7.599  
7.590  
7.588  
7.572  
7.565  
7.560  
7.557  
7.553  
7.550  
7.545  
7.540  
7.536  
7.532  
7.528  
7.525  
7.489  
7.487  
7.475  
7.464  
7.462  
7.260  
4.560  
4.548  
4.536  
4.524

1.643  
1.640  
1.638  
1.502  
1.490  
1.478  
1.303

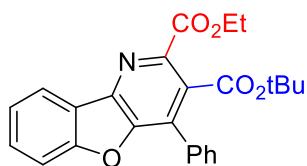

4b

<sup>1</sup>H NMR (600 MHz, CDCl<sub>3</sub>)

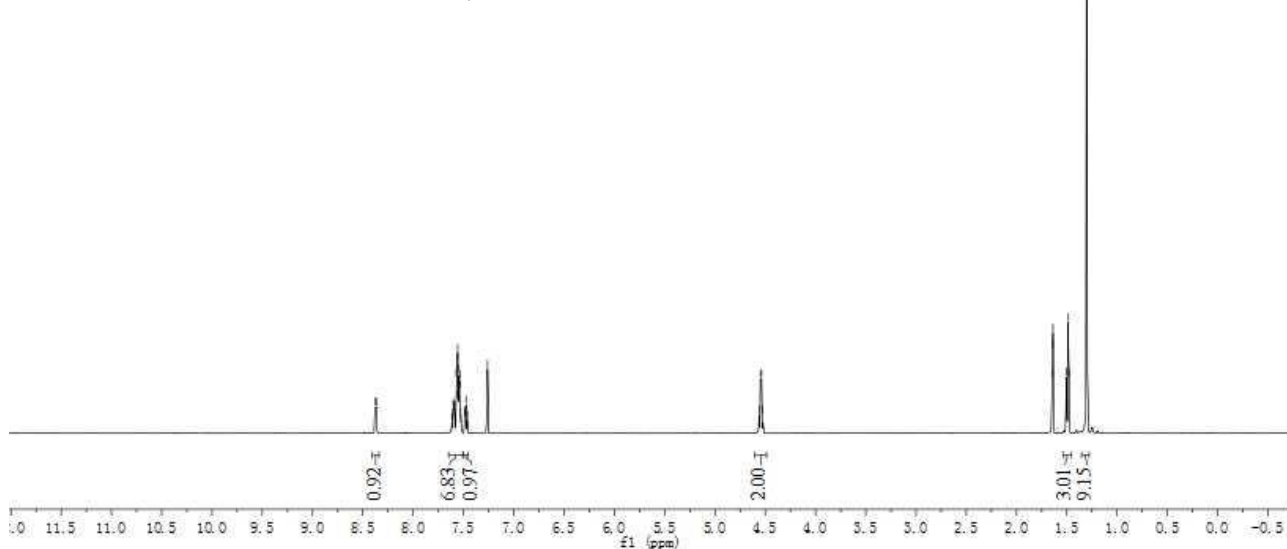

CARBON\_01

165.437  
165.300  
158.839  
148.195  
144.133  
142.887  
132.017  
131.472  
130.292  
130.108  
129.518  
129.260  
128.470  
124.093  
122.545  
122.457  
112.448

-83.128

-62.403

-27.563

-14.275

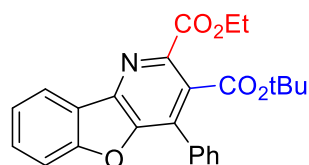

4b

<sup>13</sup>C NMR (150 MHz, CDCl<sub>3</sub>)

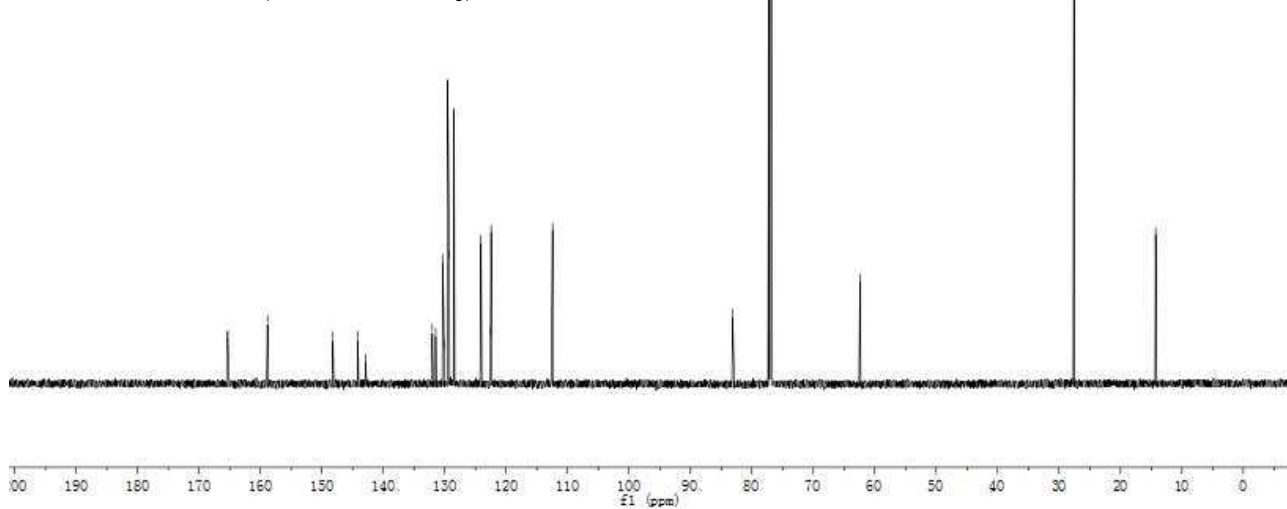

**4b**  
NOESY (600 MHz, CDCl<sub>3</sub>)

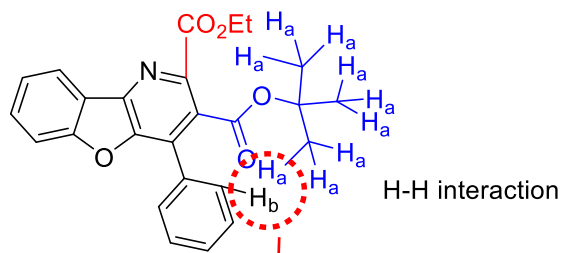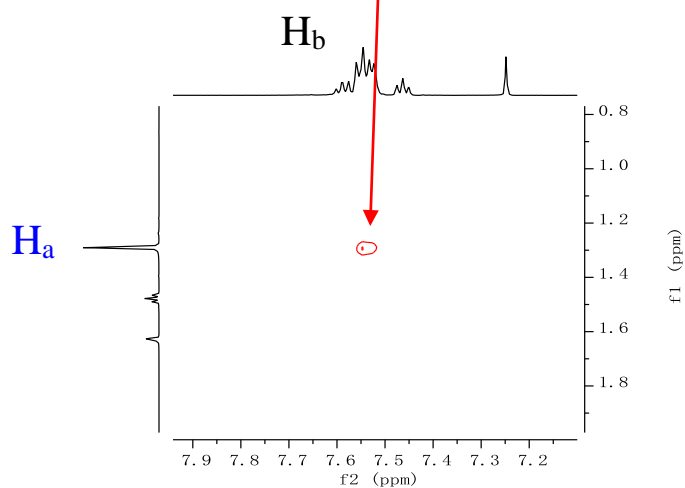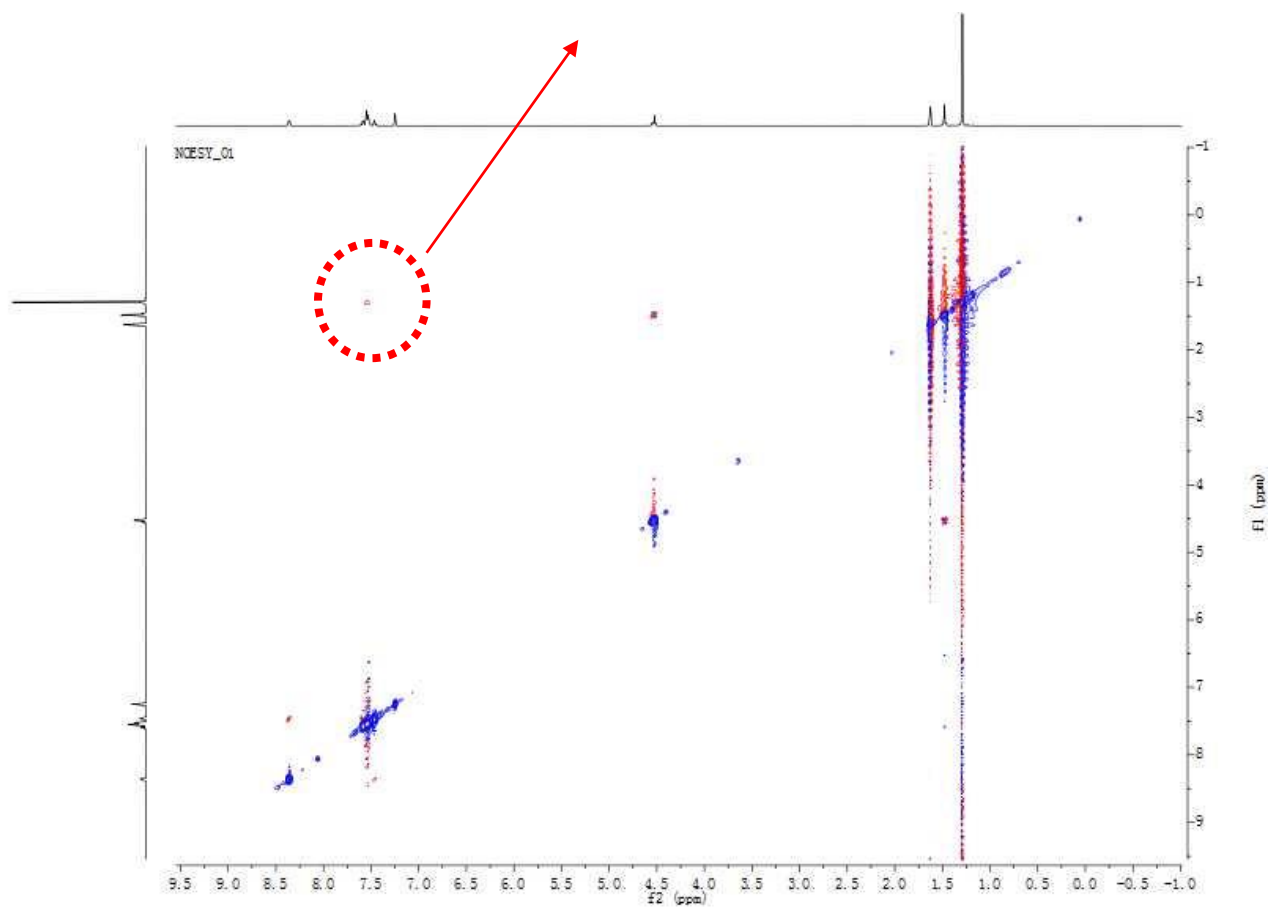

PROTON\_01

8.254  
8.241  
8.120  
8.107  
7.652  
7.640  
7.633  
7.630  
7.626  
7.620  
7.573  
7.570  
7.559  
7.547  
7.533  
7.520  
7.507  
7.480  
7.475  
7.472  
7.467  
7.461  
7.454  
7.260  
4.103  
4.091  
4.079  
4.067

-1.591  
0.975  
0.963  
0.951

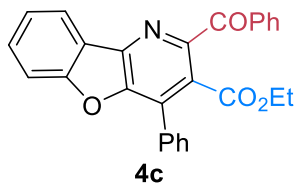

<sup>1</sup>H NMR (600 MHz, CDCl<sub>3</sub>)

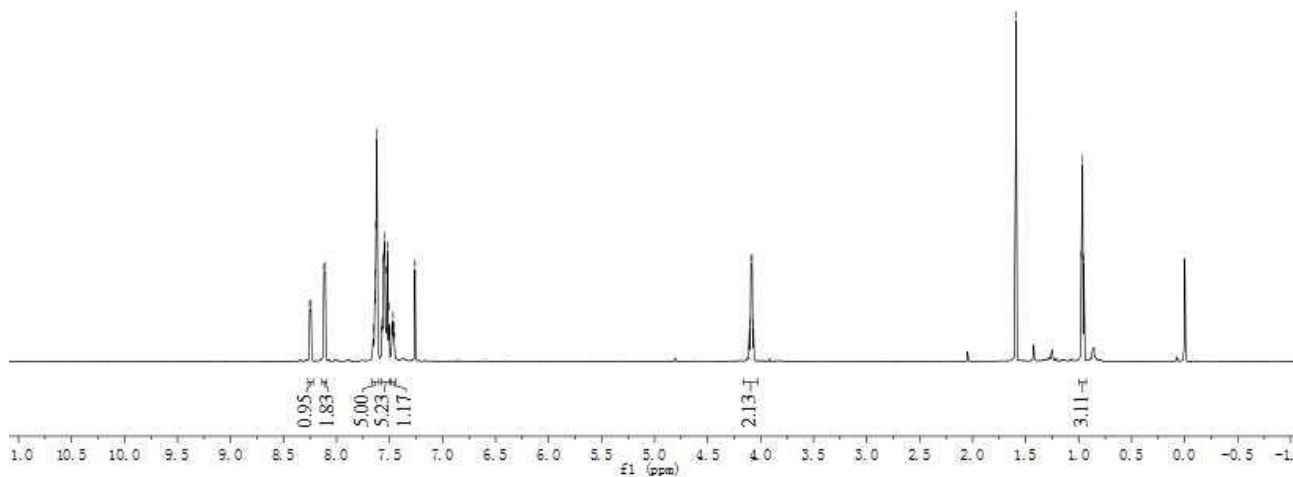

CARBON\_01

193.470  
166.811  
158.910  
151.283  
147.461  
143.831  
135.949  
133.350  
132.919  
131.693  
131.104  
130.386  
129.371  
129.241  
128.595  
128.245  
127.788  
124.165  
122.654  
122.170  
112.566

-61.913

-13.387

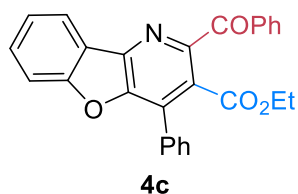

<sup>13</sup>C NMR (150 MHz, CDCl<sub>3</sub>)

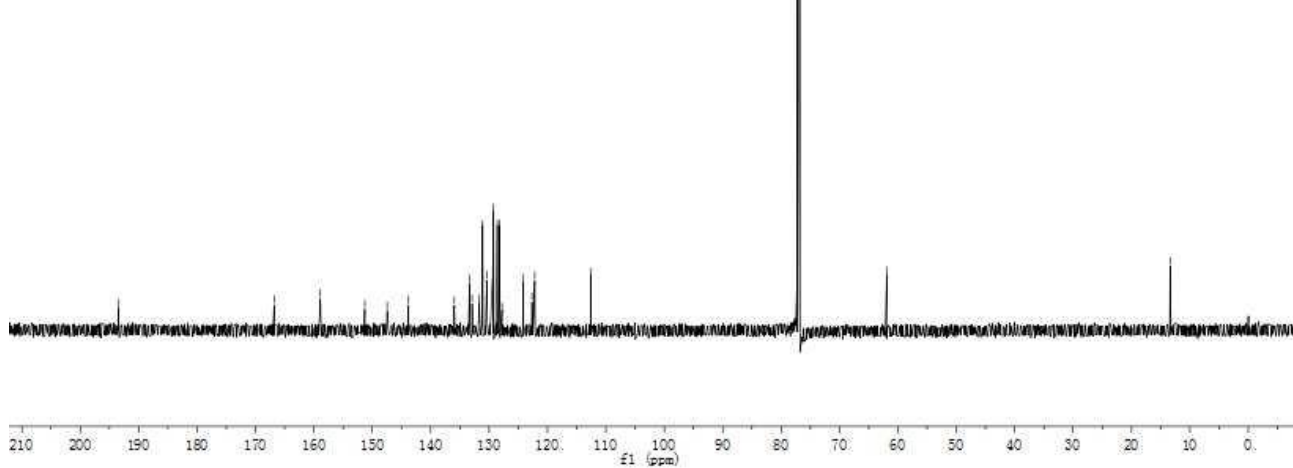

8.028  
8.016  
8.014  
7.596  
7.584  
7.572  
7.470  
7.457  
7.444  
7.422  
7.420  
7.408  
7.371  
7.357  
7.305  
7.293  
7.280  
7.260  
7.256  
7.244  
7.231  
7.229  
7.216  
7.203  
7.190  
7.177  
6.907  
6.893  
5.539  
5.535

3.824  
3.818  
3.813  
3.806  
3.801  
3.794  
3.789  
3.782  
3.777  
3.771

0.858  
0.846  
0.834

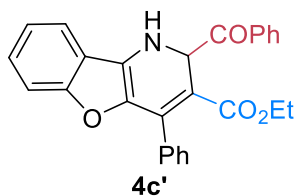

4c'

<sup>1</sup>H NMR (600 MHz, CDCl<sub>3</sub>)

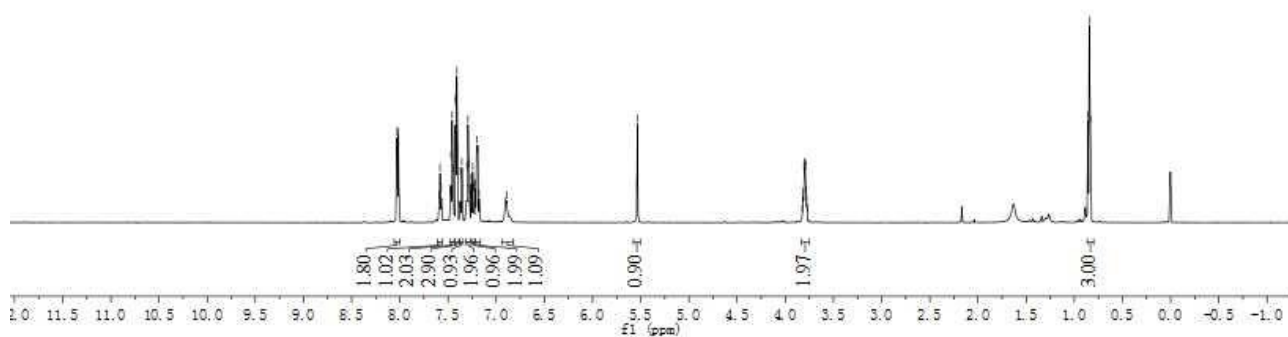

CARBON\_01

192.915  
166.304  
153.954  
144.914  
144.045  
141.090  
135.401  
133.934  
128.901  
128.890  
128.369  
128.167  
126.960  
124.434  
122.783  
120.020  
117.314  
117.169  
111.988  
102.477

60.407  
41.607  
13.543

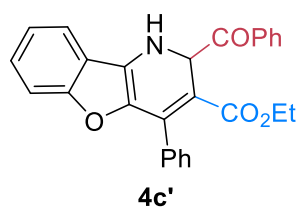

4c'

<sup>13</sup>C NMR (150 MHz, CDCl<sub>3</sub>)

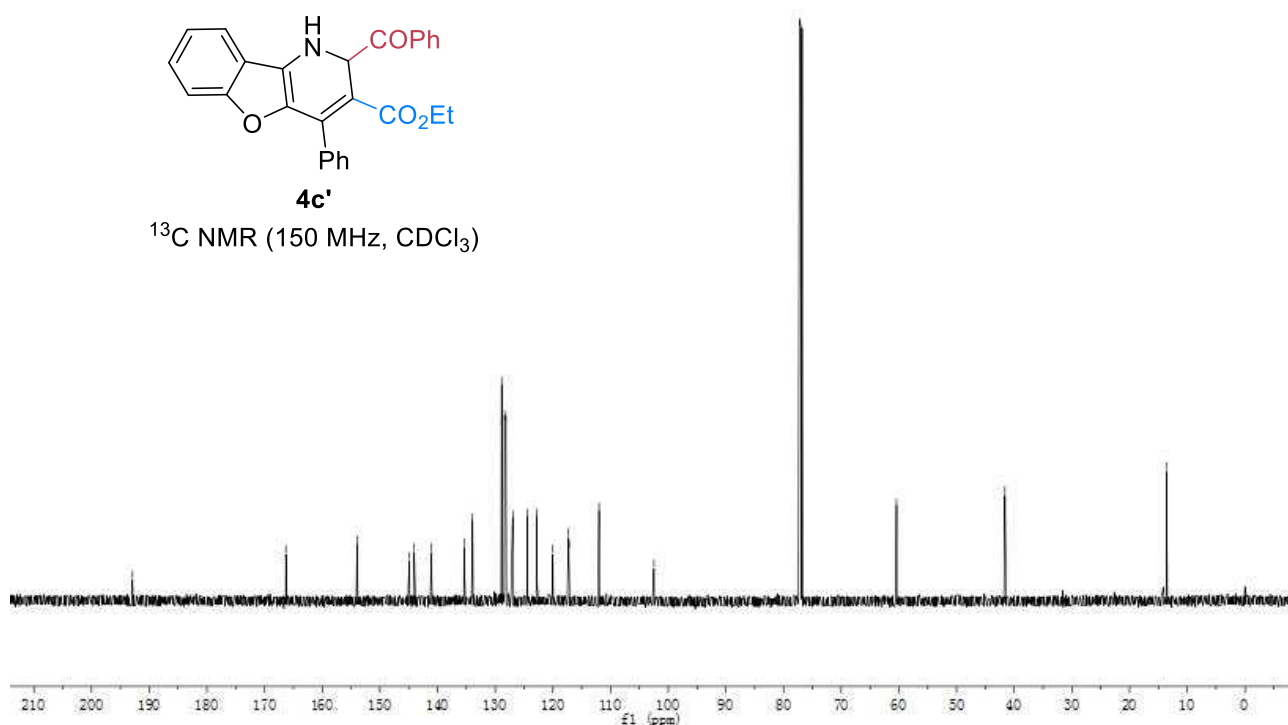

PROTON\_01

8.452  
8.439  
7.654  
7.652  
7.640  
7.631  
7.628  
7.610  
7.596  
7.533  
7.531  
7.519  
7.508  
7.506  
7.454  
7.452  
7.441  
7.432  
7.429  
7.427  
7.404  
7.402  
7.398  
7.396  
7.392  
7.388  
7.382  
7.341  
7.338  
7.333  
7.327  
7.323  
7.316  
7.303  
7.290  
7.260  
4.324  
4.312  
4.301  
4.289  
1.220  
1.208  
1.196

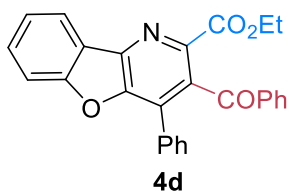

<sup>1</sup>H NMR (600 MHz, CDCl<sub>3</sub>)

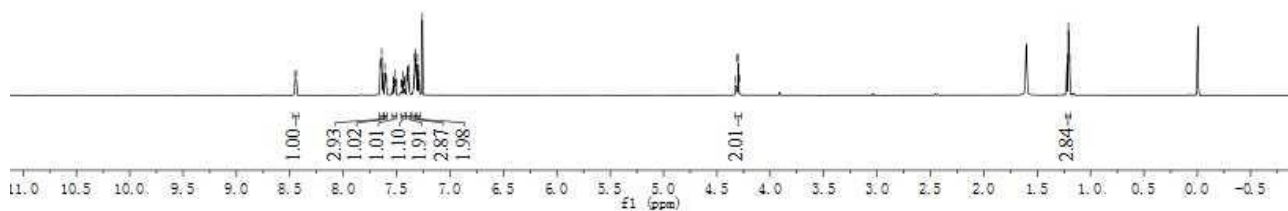

CARBON\_01

194.483  
165.089  
158.836  
148.386  
144.734  
142.737  
137.600  
135.190  
133.148  
132.259  
130.683  
130.519  
129.802  
129.244  
128.984  
128.426  
128.411  
124.265  
122.567  
122.552  
112.537  
62.518  
13.792

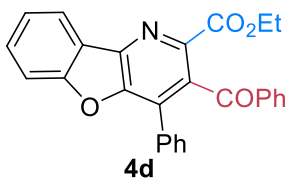

<sup>13</sup>C NMR (150 MHz, CDCl<sub>3</sub>)

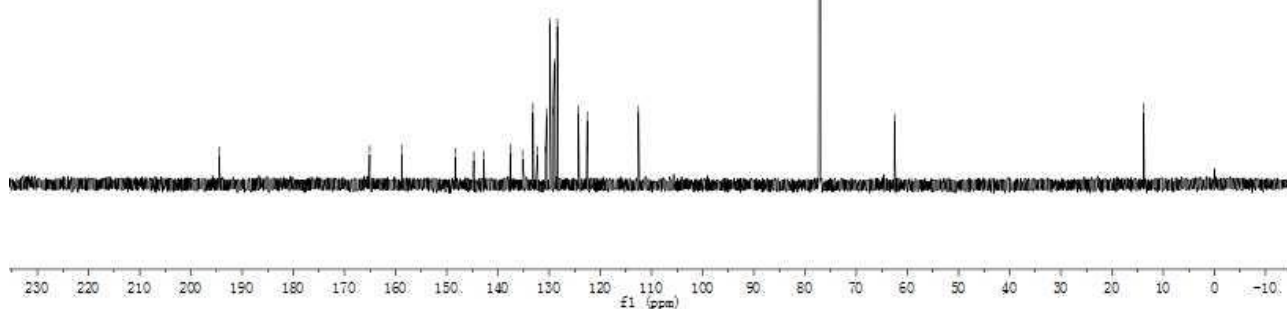

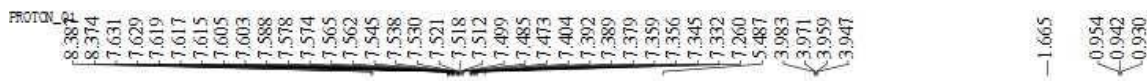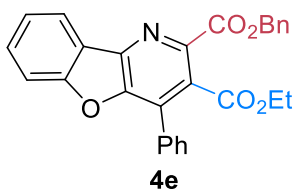

$^1\text{H NMR}$  (600 MHz,  $\text{CDCl}_3$ )

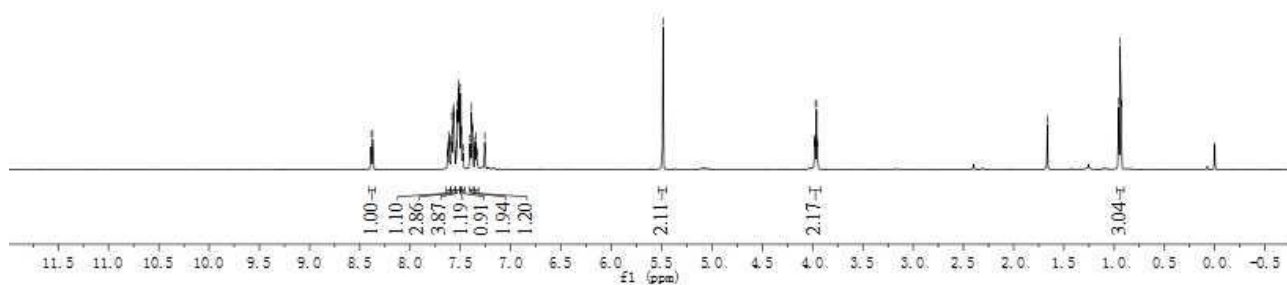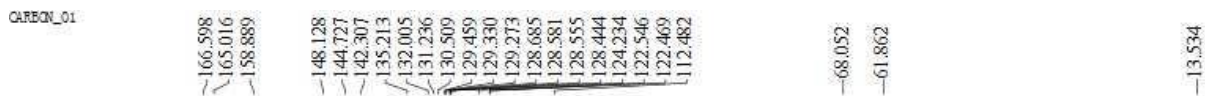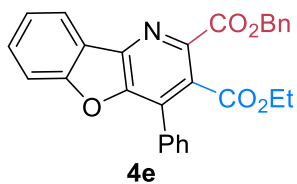

$^{13}\text{C NMR}$  (150 MHz,  $\text{CDCl}_3$ )

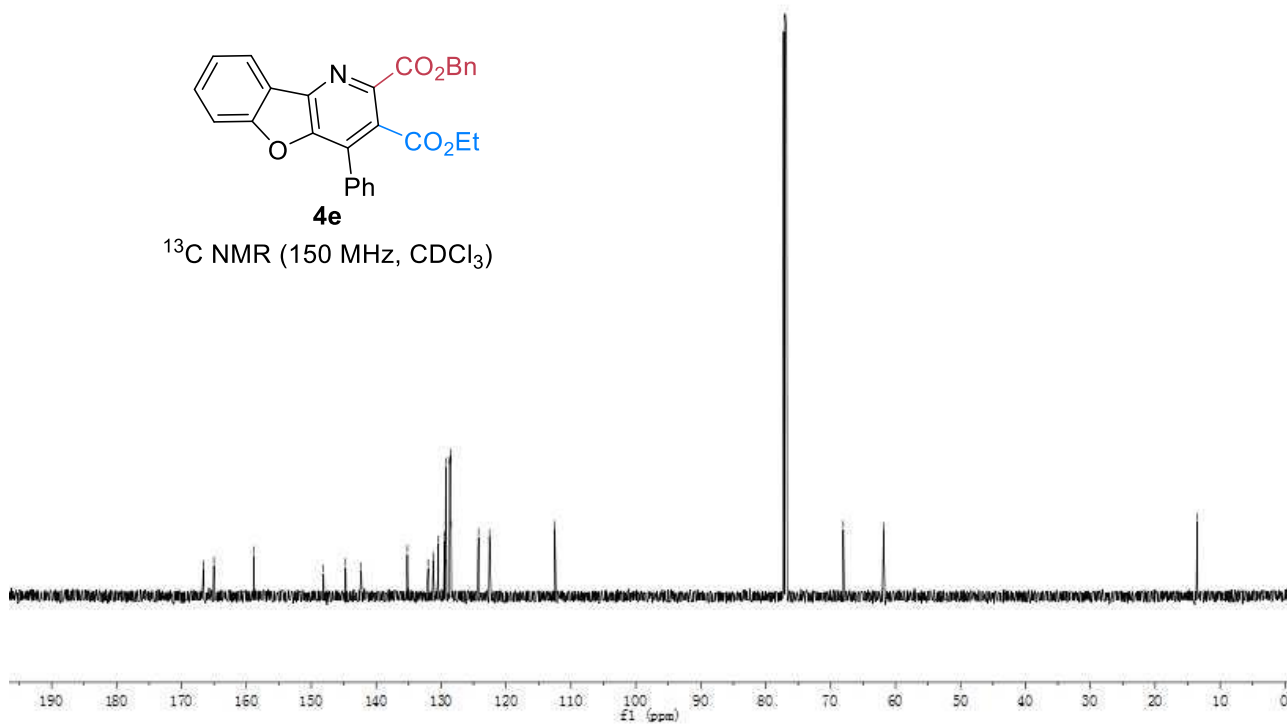

PROTON\_01

8.394  
8.381  
7.634  
7.632  
7.620  
7.618  
7.609  
7.606  
7.590  
7.576  
7.566  
7.564  
7.553  
7.550  
7.506  
7.501  
7.497  
7.494  
7.489  
7.486  
7.476  
7.473  
7.462  
7.459  
7.295  
7.285  
7.274  
7.260  
7.097  
7.093  
7.085  
7.081  
5.161  
4.512  
4.500  
4.488  
4.476  
1.623  
1.472  
1.460  
1.448

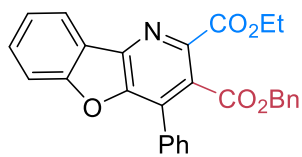

**4f**

<sup>1</sup>H NMR (600 MHz, CDCl<sub>3</sub>)

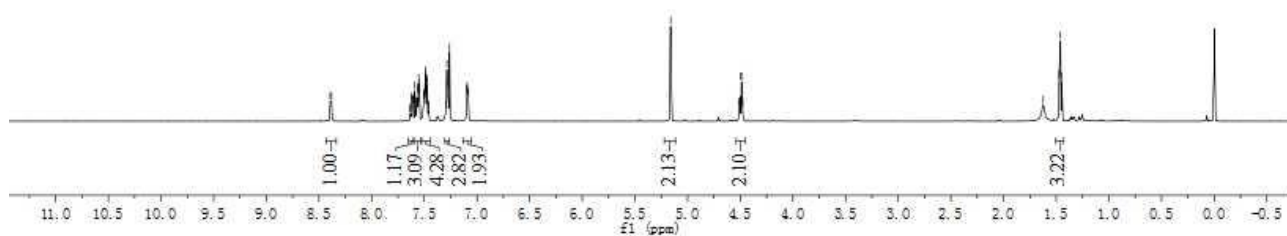

CARBON\_01

166.672  
165.107  
158.895  
148.107  
144.712  
142.486  
134.772  
132.039  
131.052  
130.522  
129.526  
129.311  
128.982  
128.677  
128.576  
128.457  
128.308  
124.219  
122.572  
122.437  
112.492  
67.928  
62.570  
14.214

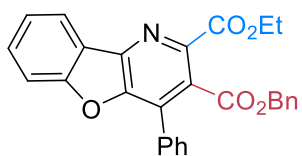

**4f**

<sup>13</sup>C NMR (150 MHz, CDCl<sub>3</sub>)

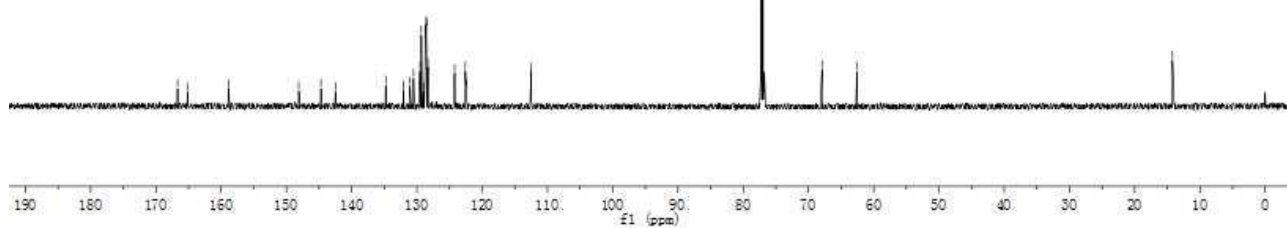



PROTON\_01

8.315  
8.302  
7.685  
7.682  
7.673  
7.671  
7.669  
7.659  
7.657  
7.619  
7.611  
7.605  
7.598  
7.594  
7.589  
7.579  
7.573  
7.565  
7.561  
7.542  
7.529  
7.517  
7.262  
7.260

1.594  
1.592  
1.456  
1.454

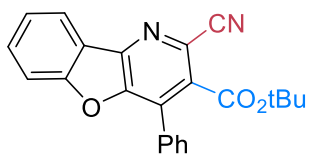

**4g**

<sup>1</sup>H NMR (600 MHz, CDCl<sub>3</sub>)

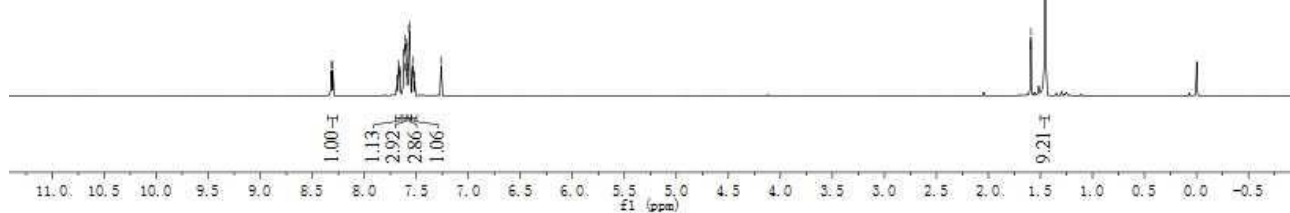

CARBON\_01

163.767  
159.054  
148.037  
146.075  
132.431  
132.365  
131.271  
130.910  
129.842  
129.273  
128.779  
127.305  
124.761  
122.346  
121.767  
116.222  
112.625

84.849

27.583

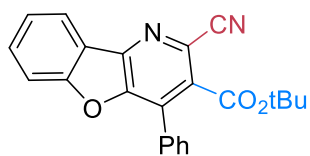

**4g**

<sup>13</sup>C NMR (150 MHz, CDCl<sub>3</sub>)

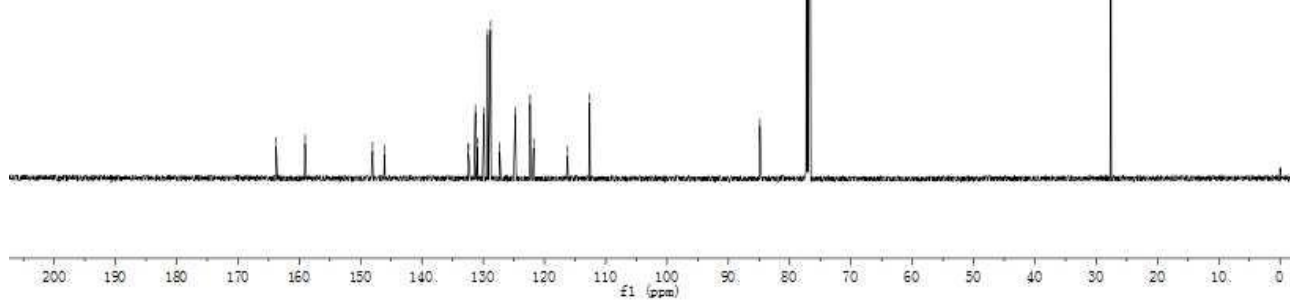

PROTON\_01

8.418  
8.405  
7.799  
7.796  
7.786  
7.783  
7.702  
7.700  
7.690  
7.688  
7.686  
7.676  
7.674  
7.655  
7.651  
7.640  
7.631  
7.628  
7.625  
7.614  
7.614  
7.544  
7.531  
7.519  
7.260

1.746  
1.582

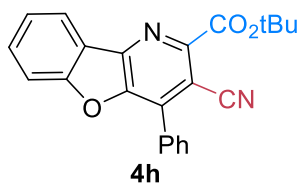

<sup>1</sup>H NMR (600 MHz, CDCl<sub>3</sub>)

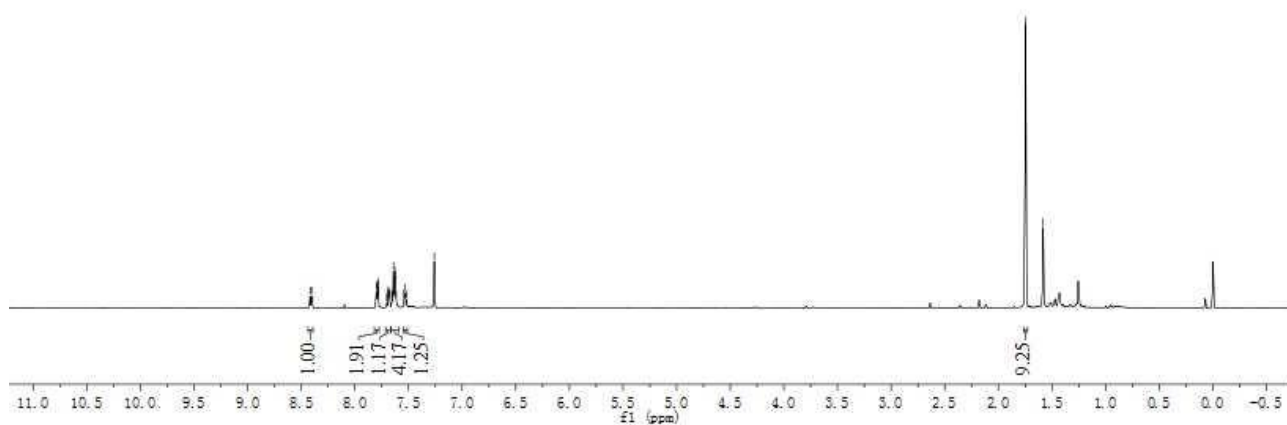

CARBON\_01

162.954  
159.396  
149.525  
146.842  
146.615  
137.411  
131.626  
130.615  
129.979  
129.898  
128.963  
124.694  
123.008  
122.147  
115.614  
112.657  
105.475

85.046

28.004

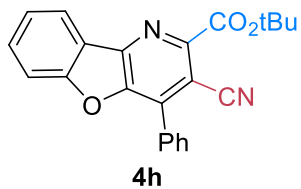

<sup>13</sup>C NMR (150 MHz, CDCl<sub>3</sub>)

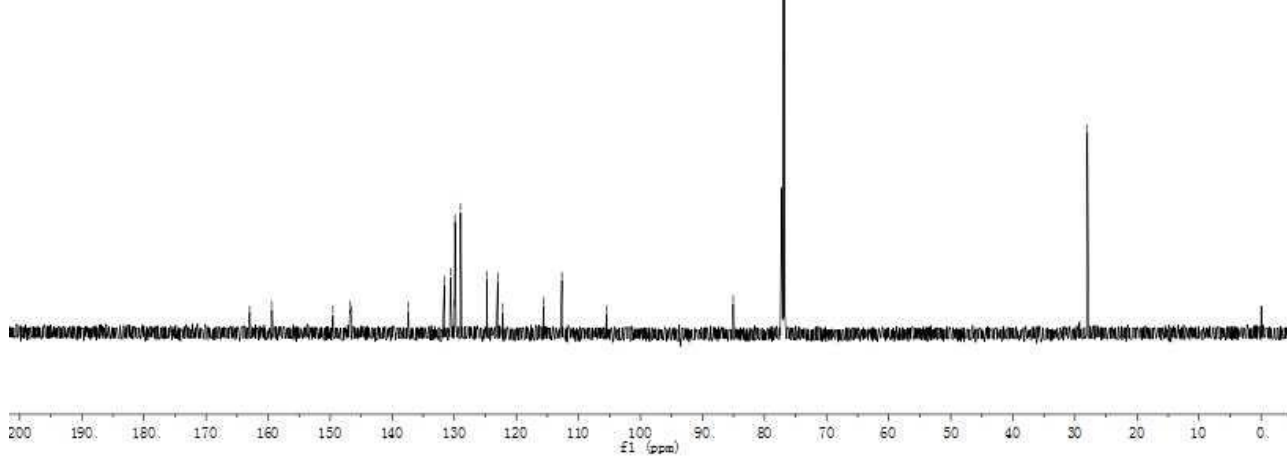

PROTON\_01

8.396  
8.383  
7.641  
7.639  
7.627  
7.625  
7.615  
7.613  
7.605  
7.599  
7.592  
7.589  
7.585  
7.562  
7.555  
7.553  
7.547  
7.537  
7.534  
7.529  
7.526  
7.507  
7.495  
7.483  
7.482  
7.260  
4.233  
4.221  
4.209  
4.197  
4.069  
1.106  
1.094  
1.082

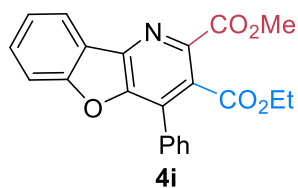

<sup>1</sup>H NMR (600 MHz, CDCl<sub>3</sub>)

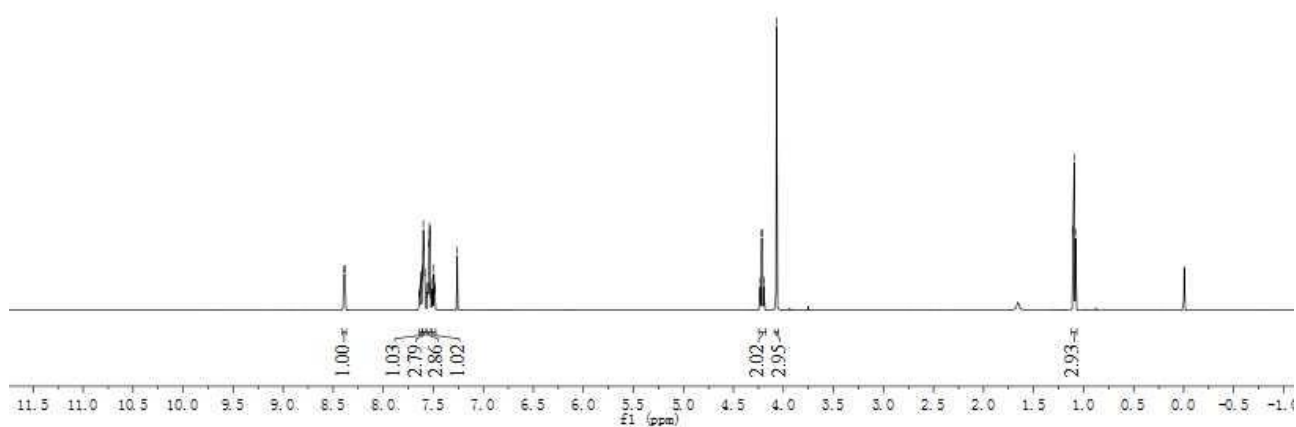

CARBON\_01

166.706  
165.503  
158.912  
148.279  
144.620  
141.727  
132.052  
131.086  
130.570  
129.772  
129.535  
129.332  
128.611  
124.272  
122.428  
122.404  
112.540  
62.009  
53.378  
13.698

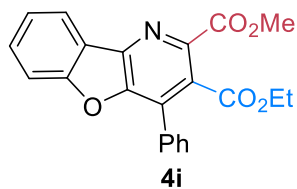

<sup>13</sup>C NMR (150 MHz, CDCl<sub>3</sub>)

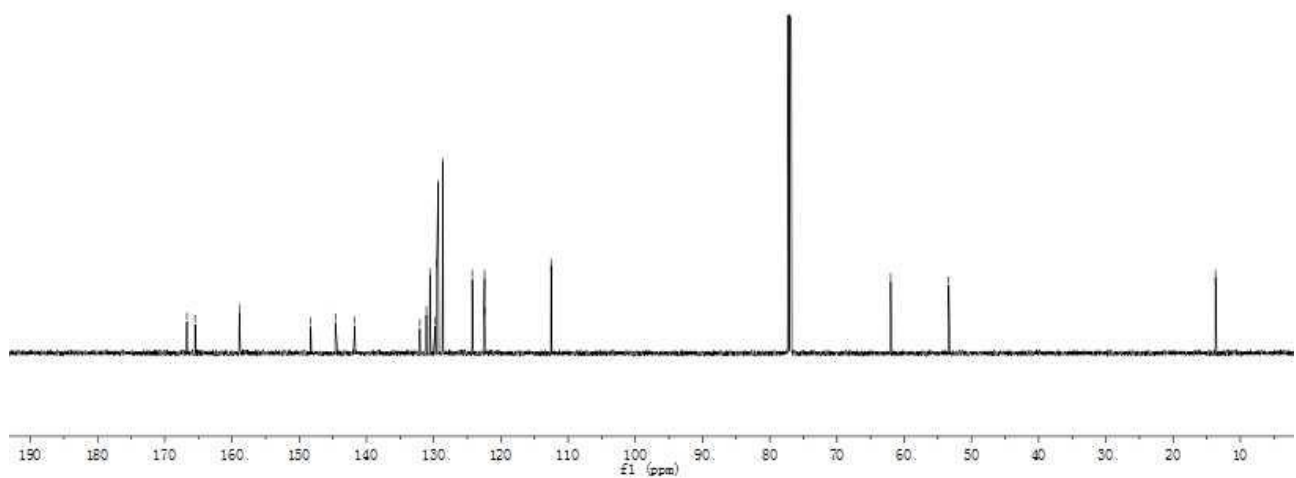

PROTON\_01

8.308  
8.285  
7.637  
7.635  
7.624  
7.621  
7.612  
7.610  
7.601  
7.596  
7.588  
7.585  
7.582  
7.565  
7.561  
7.558  
7.551  
7.541  
7.538  
7.535  
7.533  
7.527  
7.505  
7.503  
7.492  
7.481  
7.479  
7.260  
4.550  
4.538  
4.526  
4.514  
-3.734

1.497  
1.485  
1.473

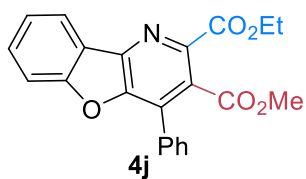

<sup>1</sup>H NMR (600 MHz, CDCl<sub>3</sub>)

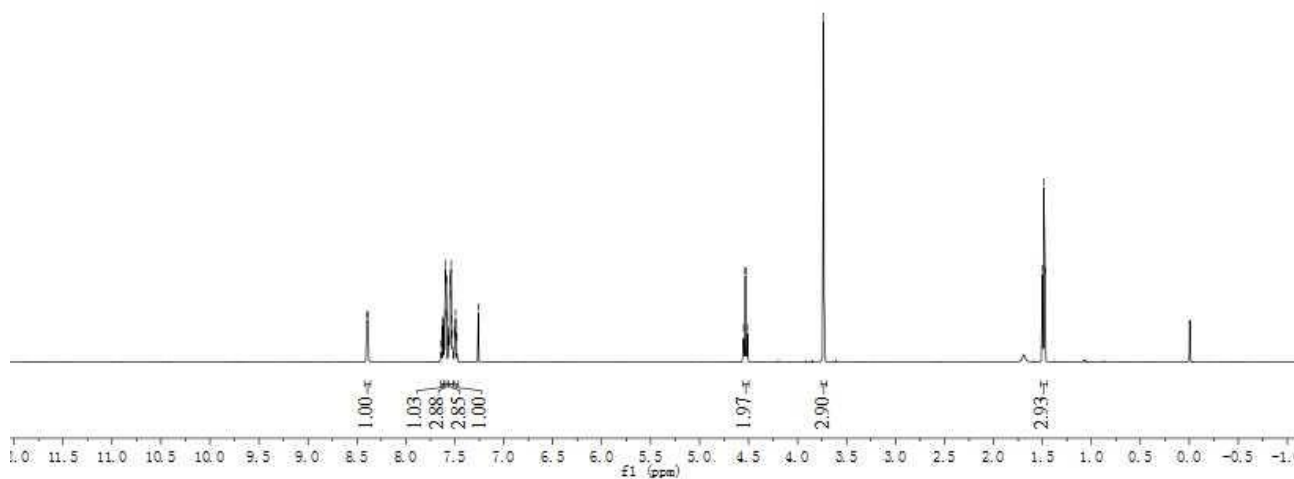

CARBON\_01

167.327  
165.120  
158.897  
148.130  
144.739  
142.320  
132.005  
131.133  
130.542  
129.561  
129.224  
129.159  
128.680  
124.231  
122.568  
122.449  
112.502

-62.601

-52.742

-14.213

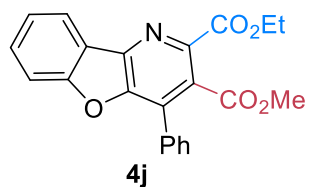

<sup>13</sup>C NMR (150 MHz, CDCl<sub>3</sub>)

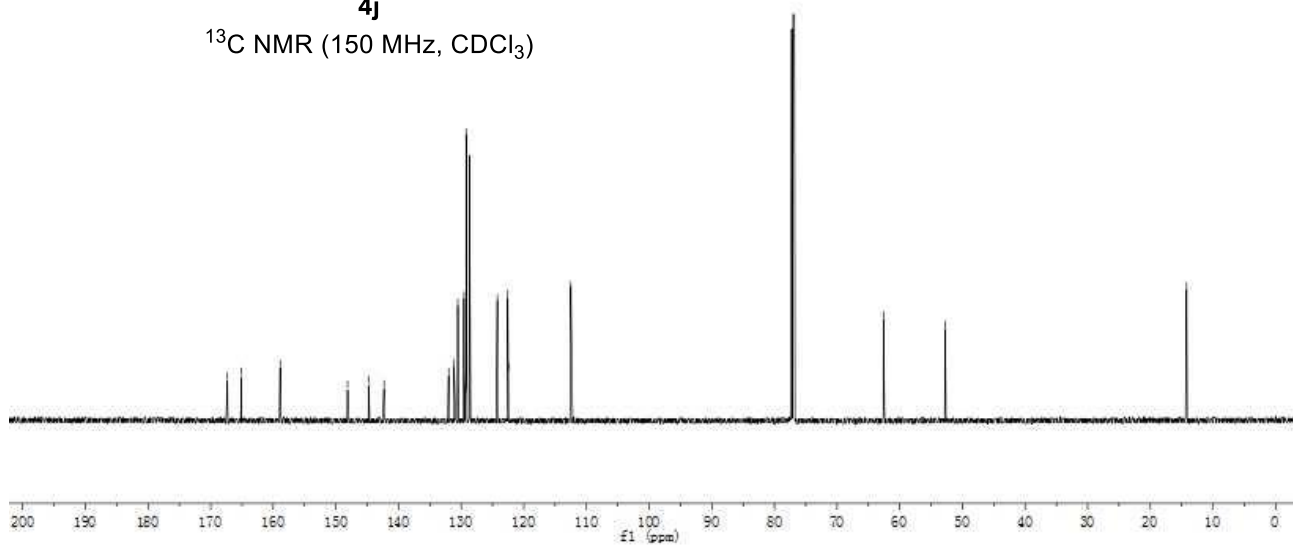

8.269  
8.265  
8.254  
8.252  
8.136  
8.133  
8.124  
8.121  
8.117  
7.634  
7.631  
7.628  
7.621  
7.618  
7.615  
7.612  
7.568  
7.564  
7.554  
7.544  
7.541  
7.539  
7.536  
7.533  
7.528  
7.518  
7.515  
7.480  
7.478  
7.472  
7.467  
7.465  
7.459  
7.453  
7.451  
7.262  
7.260  
7.005  
7.001  
6.993  
6.990  
6.985  
4.106  
4.104  
4.094  
4.092  
4.082  
4.080  
4.070  
4.068  
3.909  
3.907  
-0.976  
-0.974  
-0.964  
-0.962  
-0.952  
-0.950

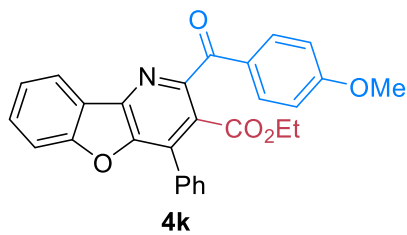

$^1\text{H NMR}$  (600 MHz,  $\text{CDCl}_3$ )

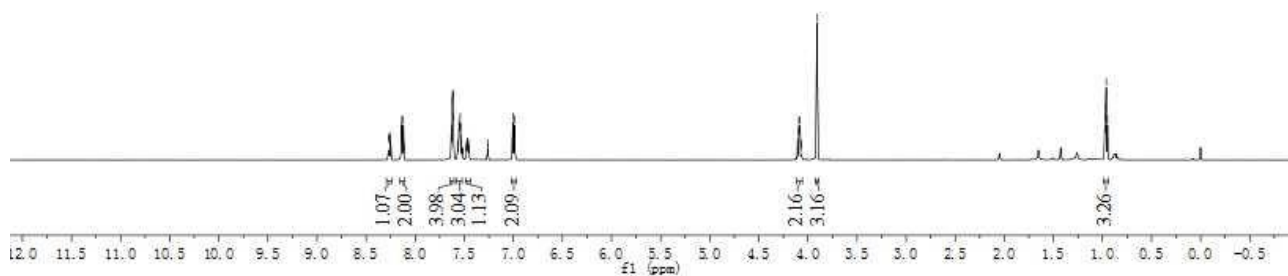

CARBON\_01  
192.007  
166.894  
163.863  
158.885  
151.869  
147.348  
143.702  
133.566  
132.918  
131.818  
130.306  
129.335  
129.258  
128.914  
128.591  
127.695  
124.128  
122.745  
122.127  
113.598  
112.566  
-61.858  
-55.531  
-13.409

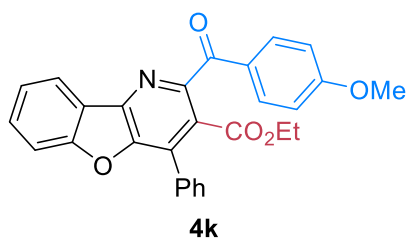

$^{13}\text{C NMR}$  (150 MHz,  $\text{CDCl}_3$ )

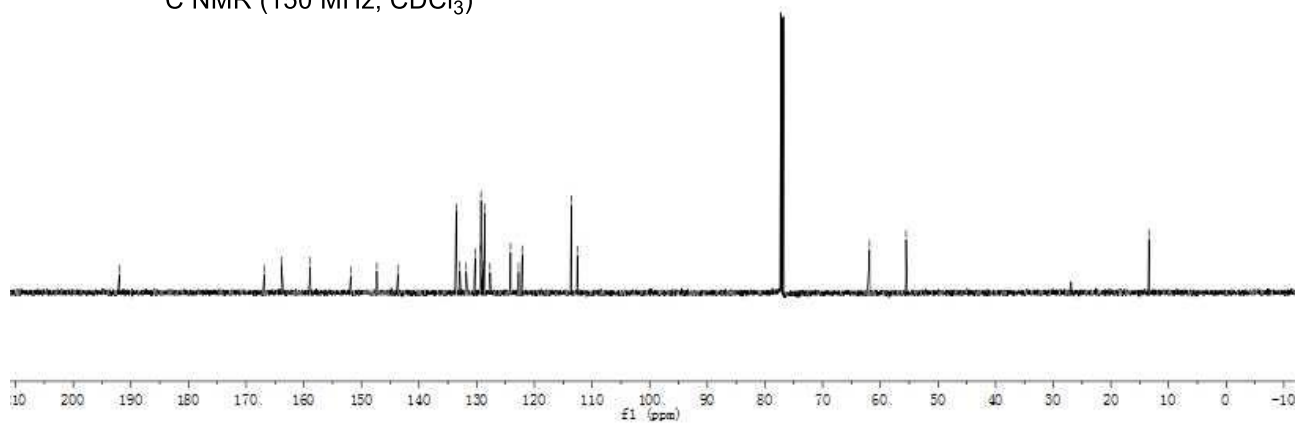

8.338  
8.334  
8.330  
8.325  
8.321  
8.319  
8.226  
8.224  
8.219  
8.217  
7.808  
7.806  
7.800  
7.798  
7.626  
7.624  
7.620  
7.617  
7.615  
7.613  
7.610  
7.607  
7.604  
7.598  
7.572  
7.566  
7.563  
7.558  
7.557  
7.554  
7.550  
7.547  
7.545  
7.543  
7.538  
7.535  
7.515  
7.512  
7.504  
7.502  
7.499  
7.491  
7.489  
7.260  
7.224  
7.218  
7.216  
7.209  
-1.325

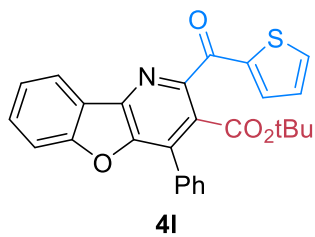

<sup>1</sup>H NMR (600 MHz, CDCl<sub>3</sub>)

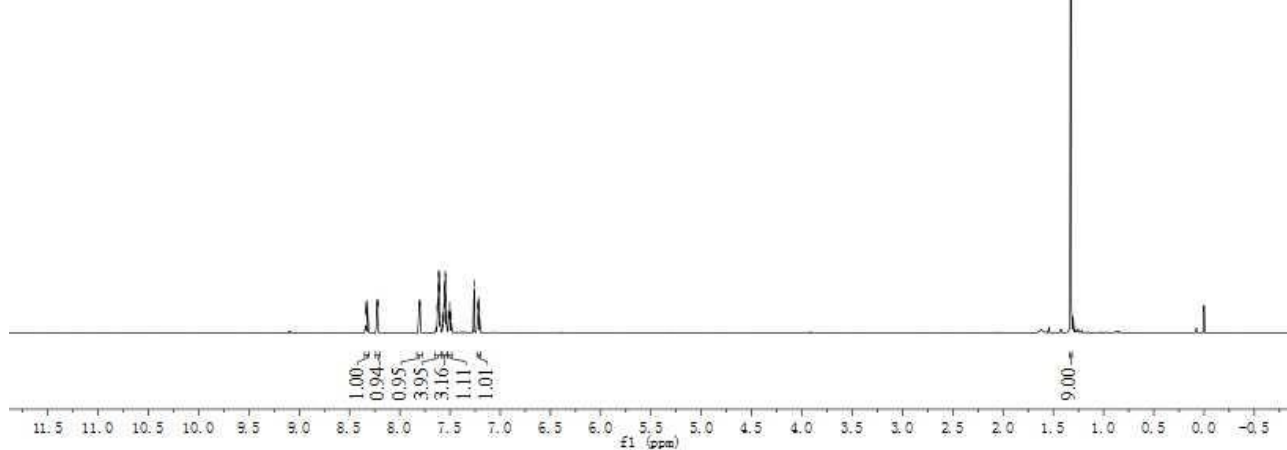

CARBON\_01

183.642  
165.457  
158.877  
148.513  
148.187  
143.056  
140.834  
136.746  
136.151  
132.492  
131.458  
130.277  
129.734  
129.545  
129.312  
128.507  
127.702  
124.238  
122.752  
122.046  
112.636  
-83.163  
-27.568

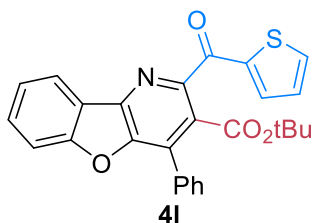

<sup>13</sup>C NMR (150 MHz, CDCl<sub>3</sub>)

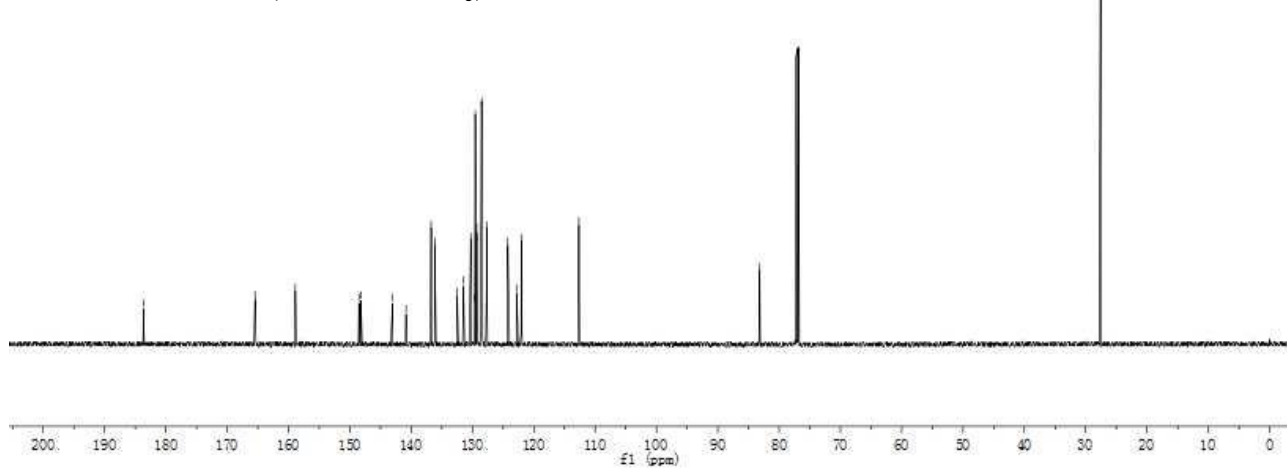

PROTON\_01

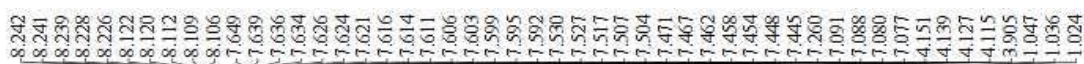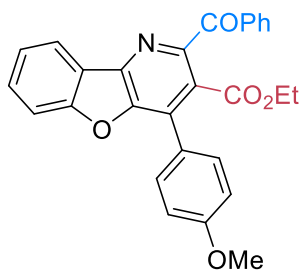

4m

<sup>1</sup>H NMR (600 MHz, CDCl<sub>3</sub>)

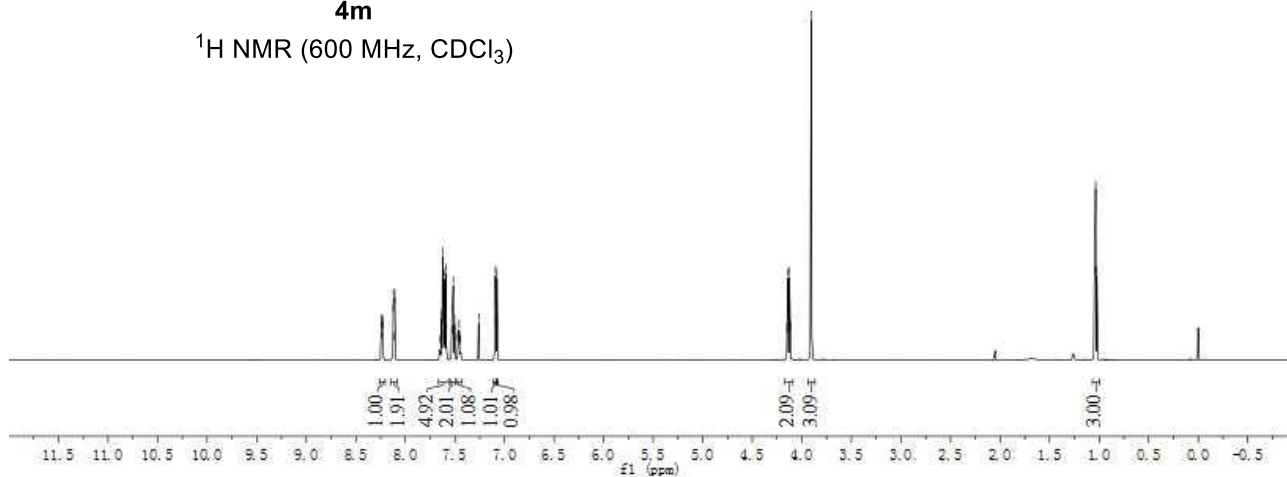

CARBON\_01

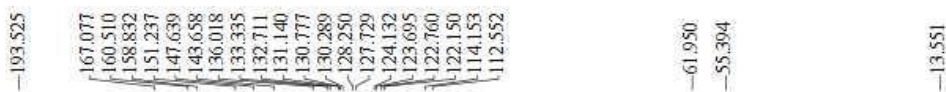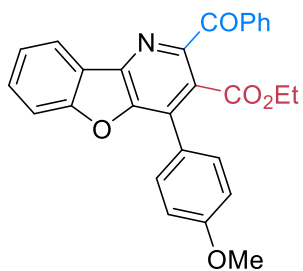

4m

<sup>13</sup>C NMR (150 MHz, CDCl<sub>3</sub>)

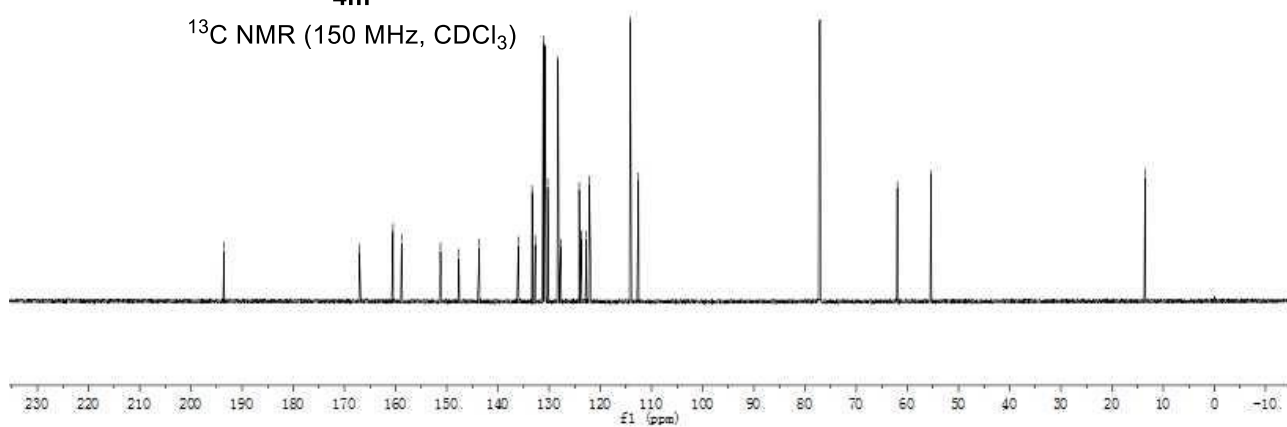

PROTON\_01

8.367  
8.364  
8.353  
8.351  
7.595  
7.593  
7.584  
7.582  
7.575  
7.563  
7.539  
7.536  
7.528  
7.524  
7.479  
7.477  
7.468  
7.466  
7.464  
7.455  
7.453  
7.260  
7.075  
7.073  
7.065  
7.061  
4.557  
4.545  
4.533  
4.521  
-3.897

1.501  
1.489  
1.477  
1.358

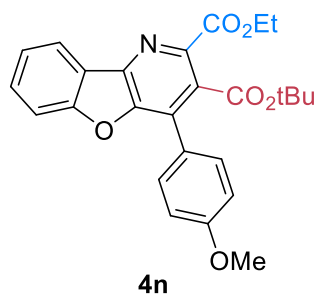

<sup>1</sup>H NMR (600 MHz, CDCl<sub>3</sub>)

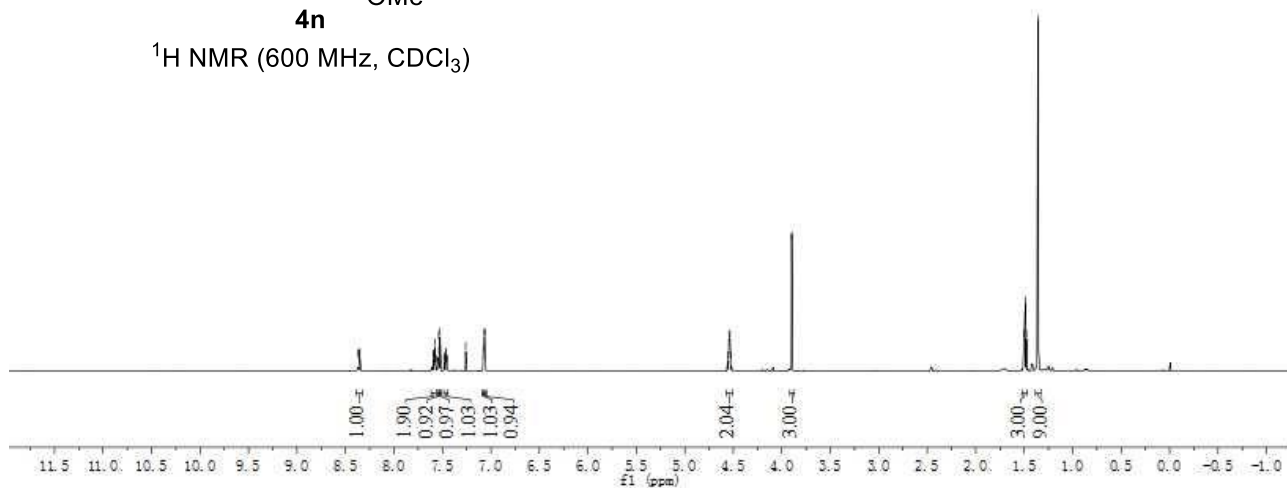

CARBON\_01

165.541  
165.464  
160.399  
158.756  
148.425  
143.974  
142.832  
131.848  
130.964  
130.208  
130.197  
124.046  
123.501  
122.614  
122.446  
113.973  
112.429

-83.128

-62.394

-55.416

-27.694

-14.305

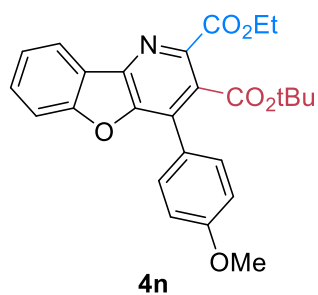

<sup>13</sup>C NMR (150 MHz, CDCl<sub>3</sub>)

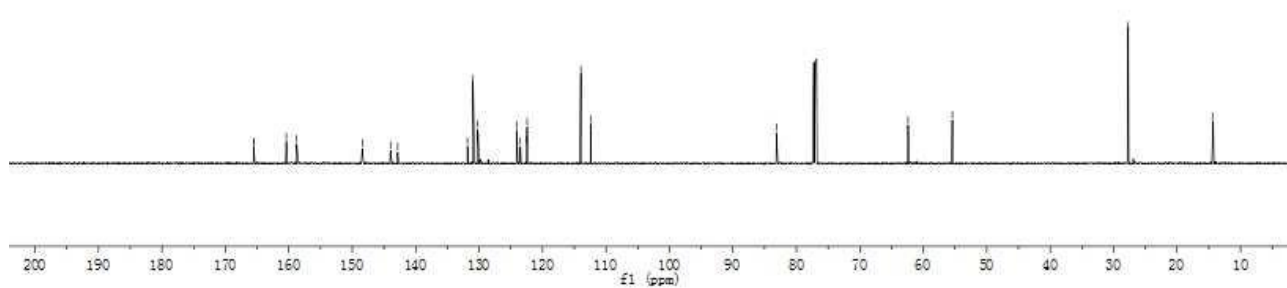



8.249  
8.230  
8.102  
8.100  
8.088  
8.086  
7.649  
7.647  
7.645  
7.637  
7.633  
7.631  
7.622  
7.620  
7.618  
7.606  
7.574  
7.571  
7.563  
7.559  
7.539  
7.536  
7.526  
7.514  
7.501  
7.482  
7.479  
7.471  
7.469  
7.466  
7.458  
7.456  
7.253  
4.126  
4.114  
4.102  
4.090

1.024  
1.012  
1.000

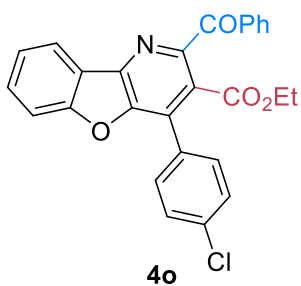

$^1\text{H NMR}$  (600 MHz,  $\text{CDCl}_3$ )

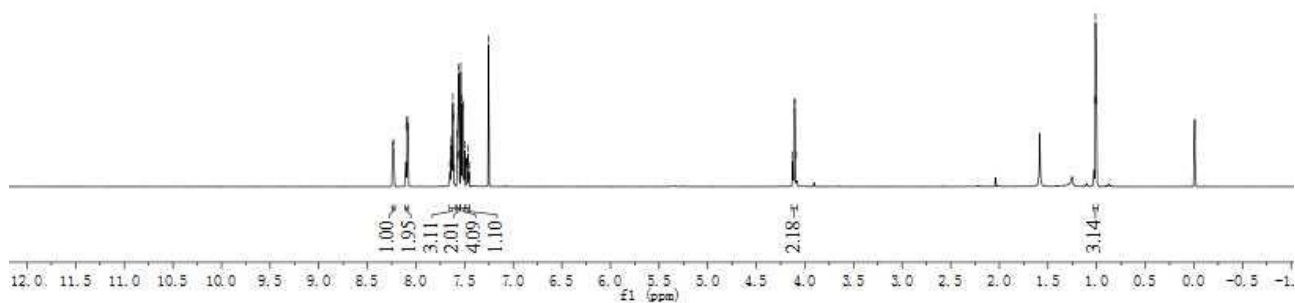

CARBON\_01

193.344  
166.589  
158.921  
151.463  
147.279  
143.999  
135.883  
135.687  
133.436  
131.714  
131.089  
130.679  
130.585  
130.082  
128.948  
128.300  
127.447  
124.327  
122.575  
122.251  
112.563  
62.111  
13.471

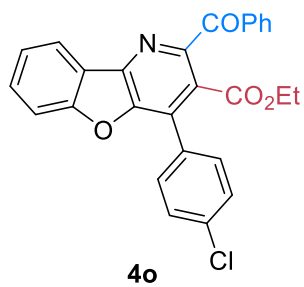

$^{13}\text{C NMR}$  (150 MHz,  $\text{CDCl}_3$ )

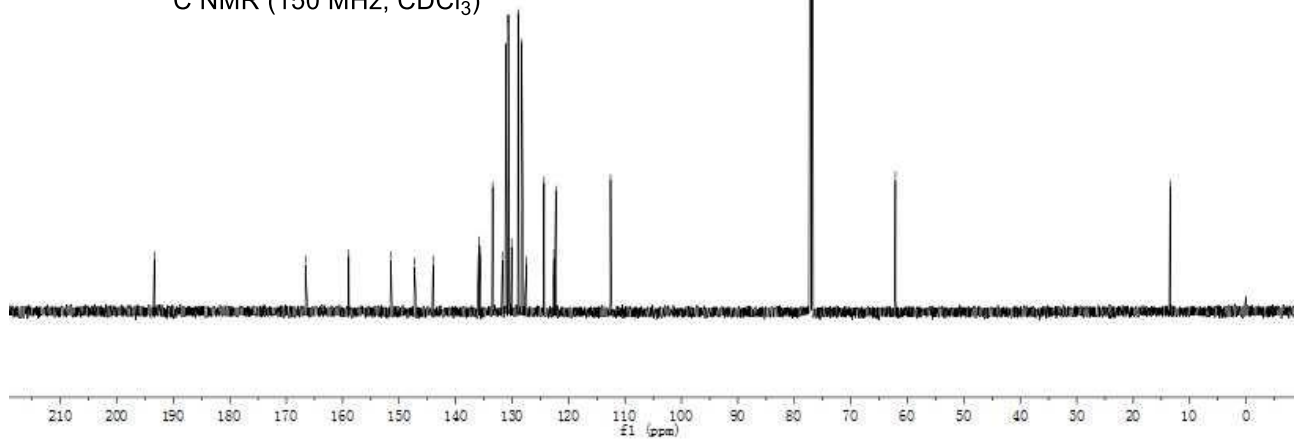

PROTON\_01

|       |
|-------|
| 8.408 |
| 8.395 |
| 8.075 |
| 8.005 |
| 7.991 |
| 7.938 |
| 7.925 |
| 7.919 |
| 7.906 |
| 7.674 |
| 7.671 |
| 7.660 |
| 7.657 |
| 7.630 |
| 7.617 |
| 7.605 |
| 7.599 |
| 7.588 |
| 7.579 |
| 7.574 |
| 7.565 |
| 7.525 |
| 7.511 |
| 7.495 |
| 7.483 |
| 7.409 |
| 7.397 |
| 7.384 |
| 7.360 |
| 7.348 |
| 7.260 |

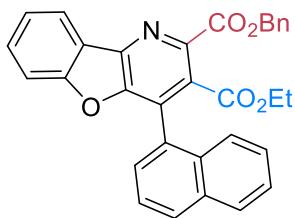

**4p**

<sup>1</sup>H NMR (600 MHz, CDCl<sub>3</sub>)

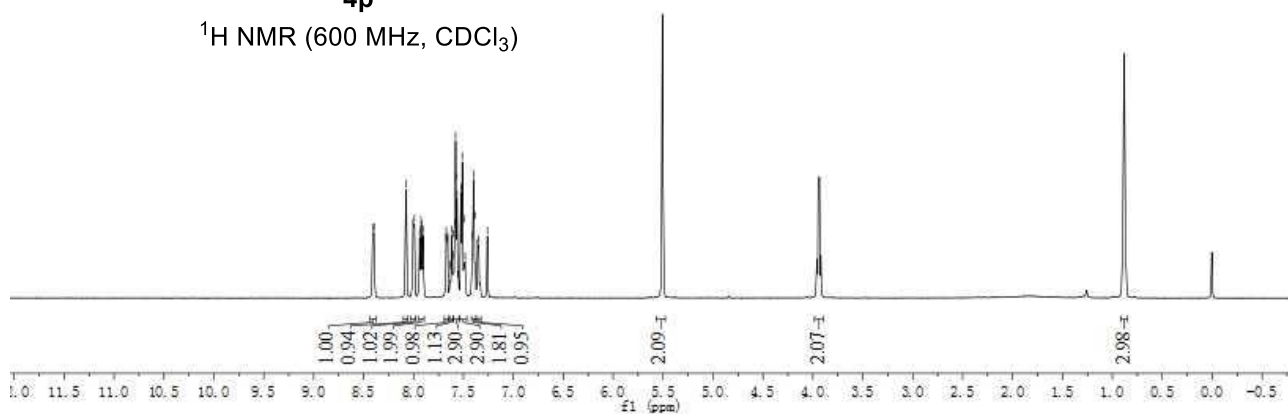

CARBON\_01

|         |
|---------|
| 166.665 |
| 165.047 |
| 158.928 |
| 148.337 |
| 144.766 |
| 142.394 |
| 135.231 |
| 133.416 |
| 132.929 |
| 132.048 |
| 130.546 |
| 129.461 |
| 129.163 |
| 128.703 |
| 128.614 |
| 128.576 |
| 128.467 |
| 128.423 |
| 128.353 |
| 127.860 |
| 127.189 |
| 126.768 |
| 126.369 |
| 124.277 |
| 122.584 |
| 122.483 |
| 112.510 |
| 68.084  |
| 61.919  |
| 13.570  |

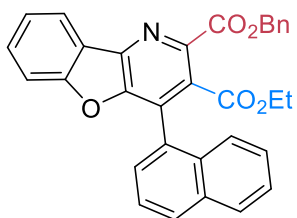

**4p**

<sup>13</sup>C NMR (150 MHz, CDCl<sub>3</sub>)

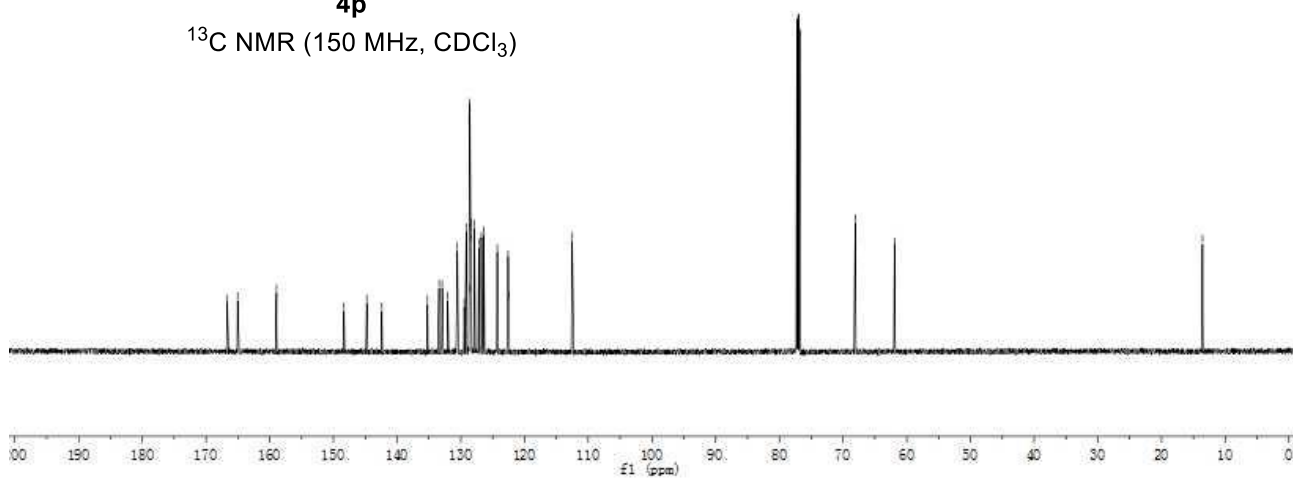

PROTON\_01

8.214  
8.201  
8.101  
8.098  
8.087  
8.085  
7.668  
7.654  
7.644  
7.642  
7.635  
7.624  
7.611  
7.609  
7.607  
7.603  
7.601  
7.515  
7.503  
7.492  
7.489  
7.468  
7.466  
7.454  
7.443  
7.441  
7.248  
7.241  
7.238  
7.232  
4.264  
4.252  
4.240  
4.229

1.150  
1.138  
1.126

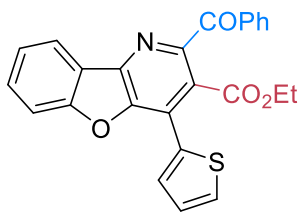

4q

<sup>1</sup>H NMR (600 MHz, CDCl<sub>3</sub>)

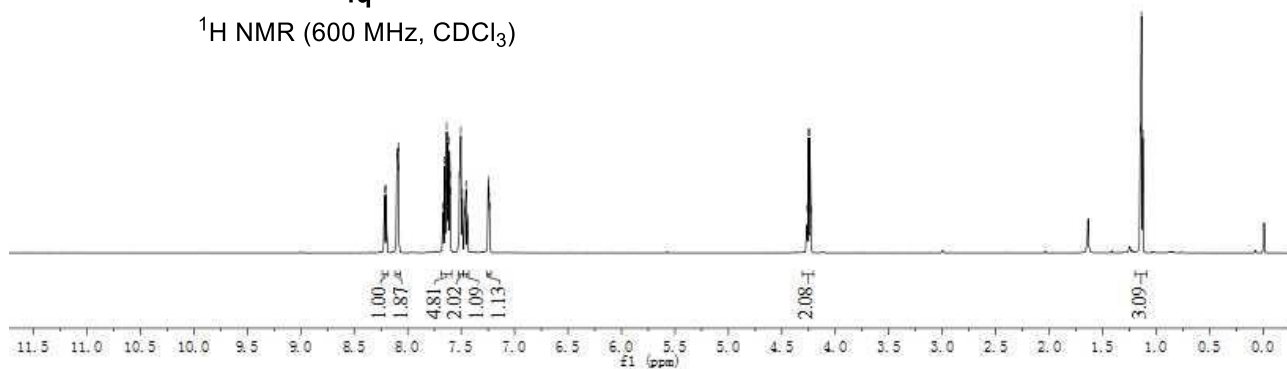

CARBON\_01

193.240  
167.016  
158.740  
150.624  
146.942  
143.720  
136.025  
133.317  
131.217  
131.171  
130.606  
130.439  
129.271  
128.212  
127.022  
127.442  
125.833  
124.316  
122.663  
122.155  
112.583

62.238

13.555

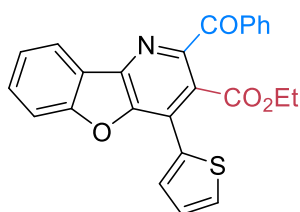

4q

<sup>13</sup>C NMR (150 MHz, CDCl<sub>3</sub>)

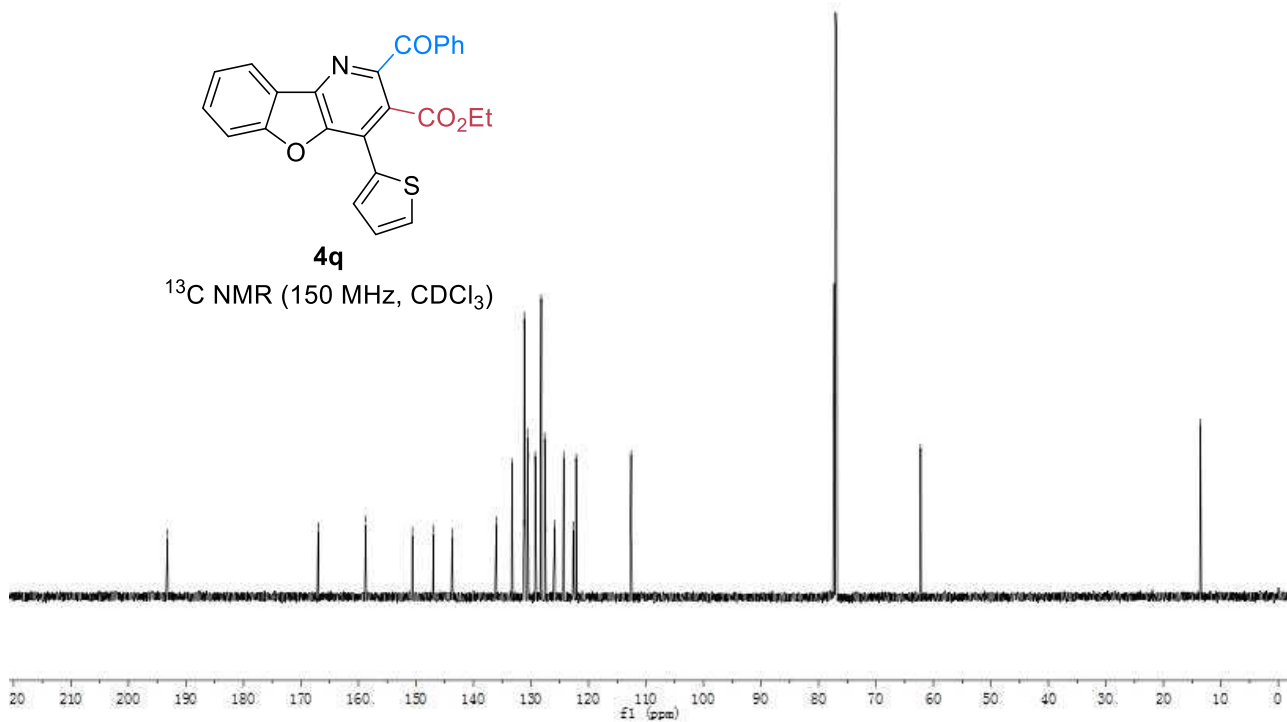

8.106  
8.104  
8.102  
8.092  
8.090  
8.087  
7.628  
7.618  
7.615  
7.612  
7.609  
7.601  
7.598  
7.596  
7.555  
7.552  
7.545  
7.533  
7.530  
7.528  
7.523  
7.520  
7.510  
7.500  
7.497  
7.260  
7.098  
7.094  
7.053  
7.049  
7.039  
7.035  
4.075  
4.063  
4.052  
4.040  
3.906

0.955  
0.943  
0.931

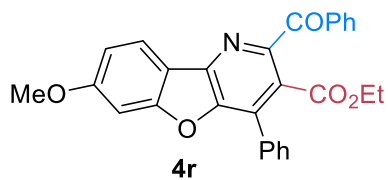

<sup>1</sup>H NMR (600 MHz, CDCl<sub>3</sub>)

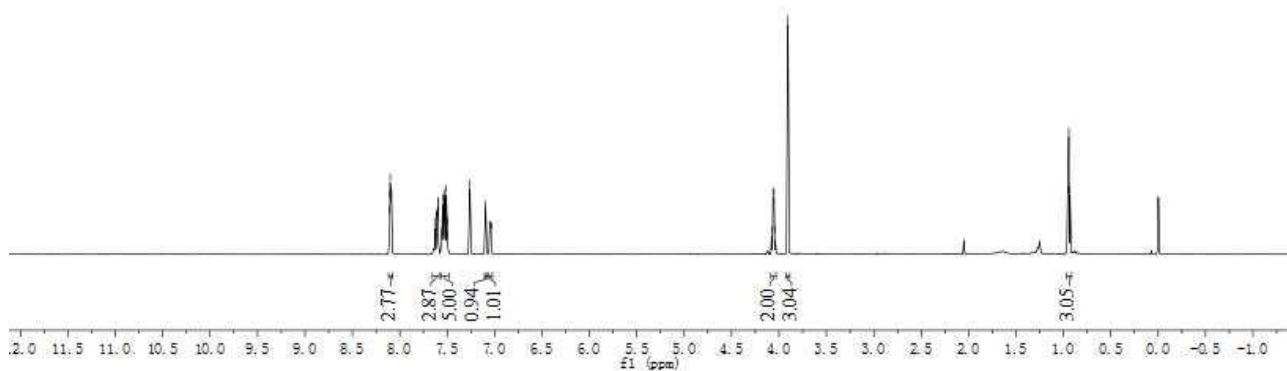

CARBON\_01

193.659  
166.902  
162.411  
160.725  
151.402  
147.367  
144.249  
136.030  
133.313  
132.270  
131.895  
131.064  
129.251  
129.232  
128.557  
128.254  
126.303  
122.710  
115.533  
113.189  
96.630

61.831  
55.869

13.387

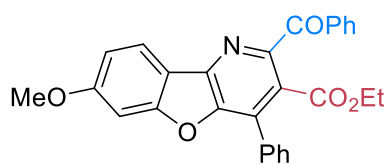

<sup>13</sup>C NMR (150 MHz, CDCl<sub>3</sub>)

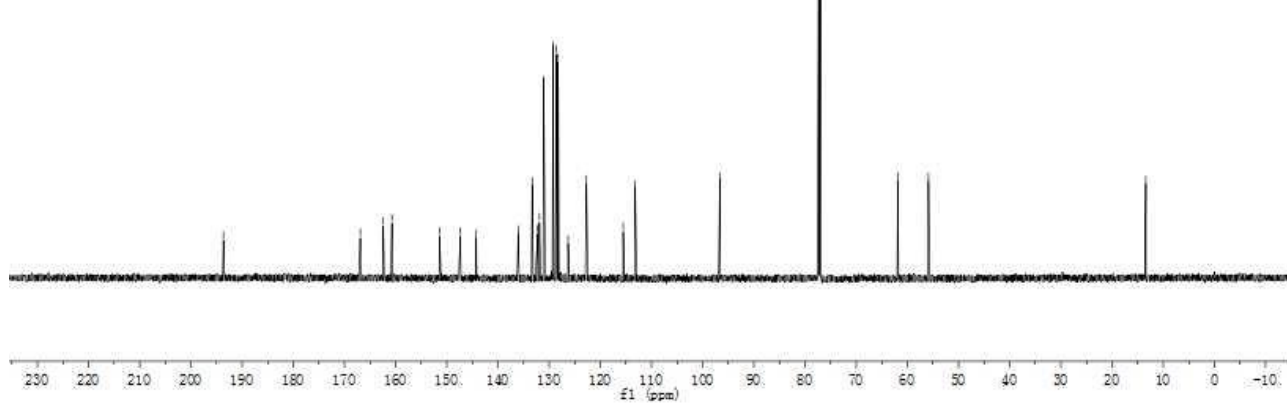

PROTON\_01

8.378  
8.375  
8.102  
8.090  
8.087  
7.720  
7.717  
7.706  
7.702  
7.653  
7.640  
7.618  
7.615  
7.609  
7.605  
7.602  
7.568  
7.565  
7.559  
7.553  
7.550  
7.547  
7.542  
7.530  
7.516  
7.500  
7.260  
4.115  
4.103  
4.091  
4.079

1.570  
0.980  
0.968  
0.956

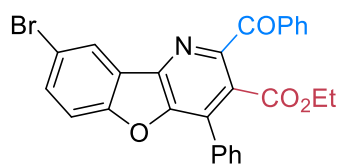

**4s**

<sup>1</sup>H NMR (600 MHz, CDCl<sub>3</sub>)

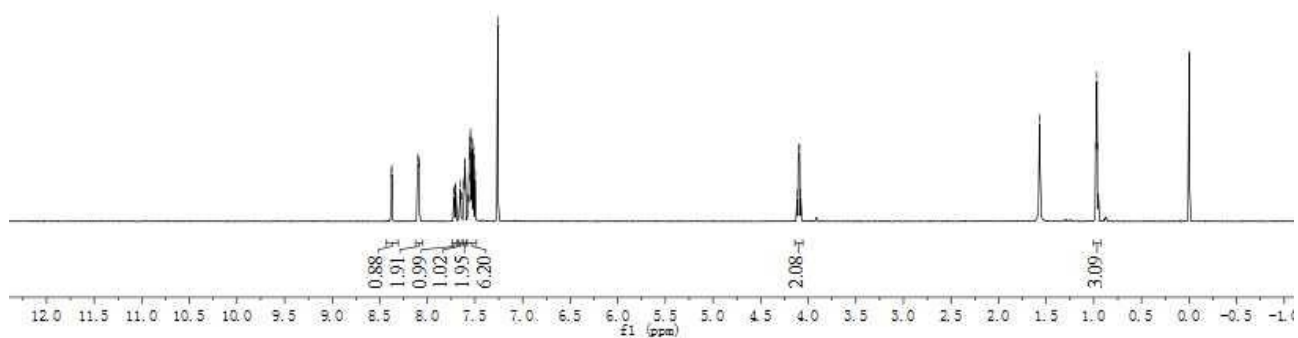

CARBON\_01

193.234  
166.592  
157.508  
151.636  
148.027  
142.443  
135.822  
133.465  
133.370  
133.160  
131.354  
131.087  
129.557  
129.212  
128.672  
128.542  
128.312  
124.917  
124.618  
117.303  
114.151  
62.030  
13.409

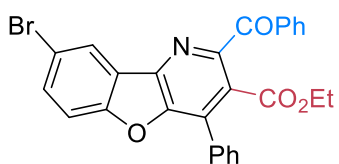

**4s**

<sup>13</sup>C NMR (150 MHz, CDCl<sub>3</sub>)

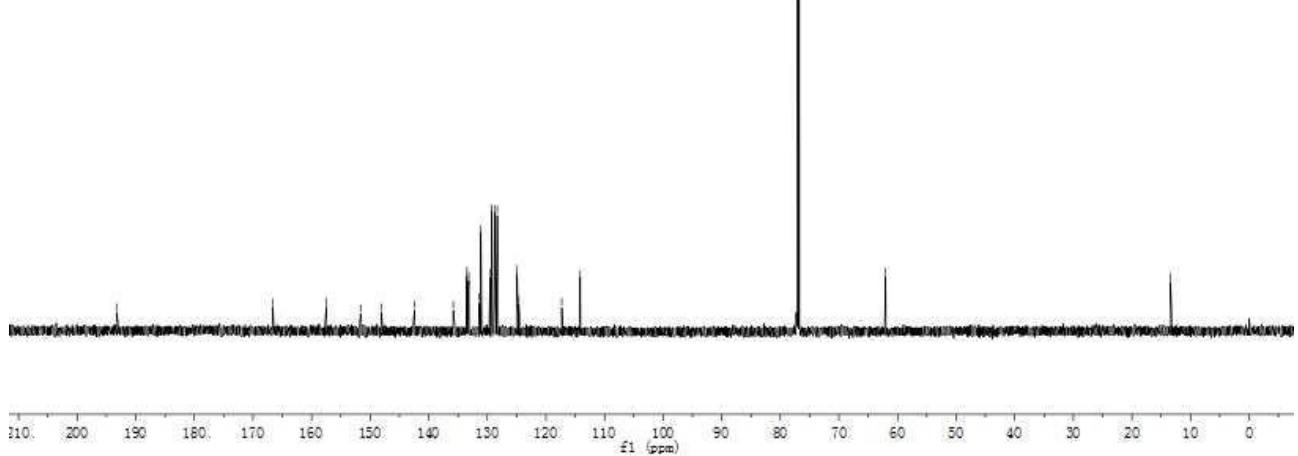

PROTON\_01

8.102  
8.088  
8.067  
8.064  
8.053  
8.051  
7.624  
7.611  
7.607  
7.603  
7.599  
7.593  
7.590  
7.561  
7.557  
7.557  
7.547  
7.544  
7.535  
7.533  
7.530  
7.527  
7.522  
7.510  
7.497  
7.487  
7.484  
7.260  
7.085  
7.082  
7.041  
7.037  
7.027  
7.023  
3.899

-1.184

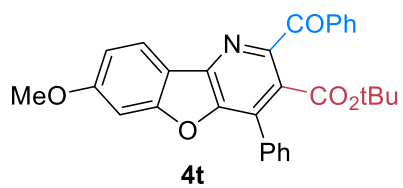

<sup>1</sup>H NMR (600 MHz, CDCl<sub>3</sub>)

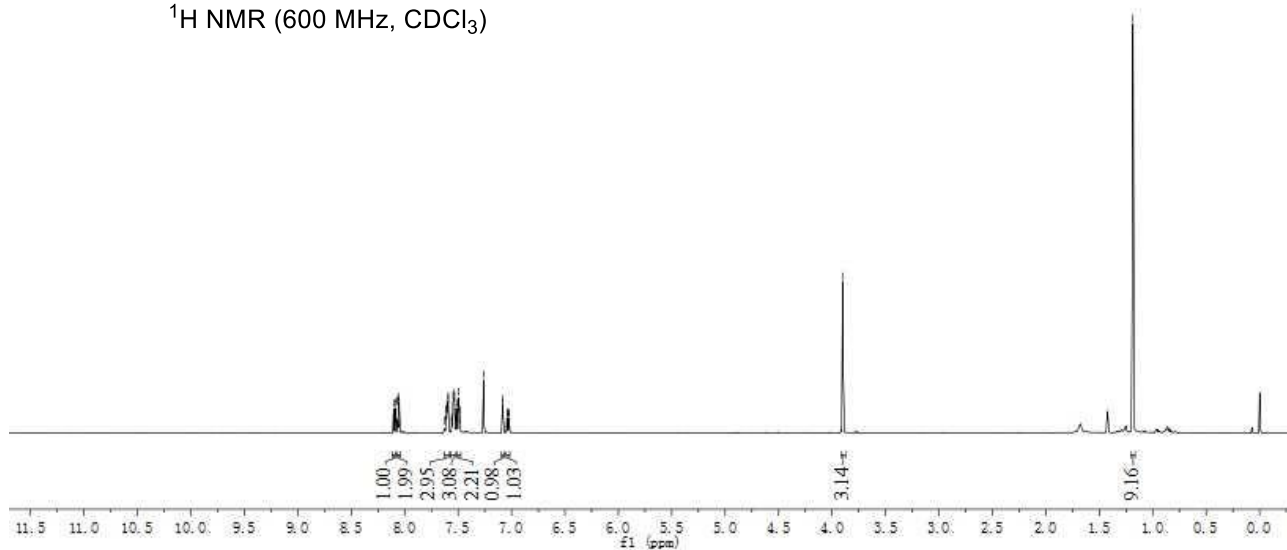

CARBON\_01

-193.914

-165.529

-162.292

-160.649

-151.751

-147.348

-143.972

-136.190

-133.297

-132.148

-132.120

-130.914

-129.382

-129.109

-128.483

-128.296

-127.106

-122.694

-115.579

-113.065

-96.619

-83.085

-55.849

-27.307

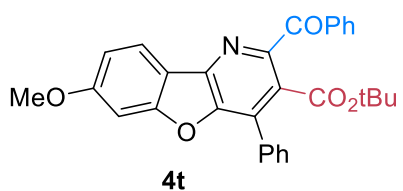

<sup>13</sup>C NMR (150 MHz, CDCl<sub>3</sub>)

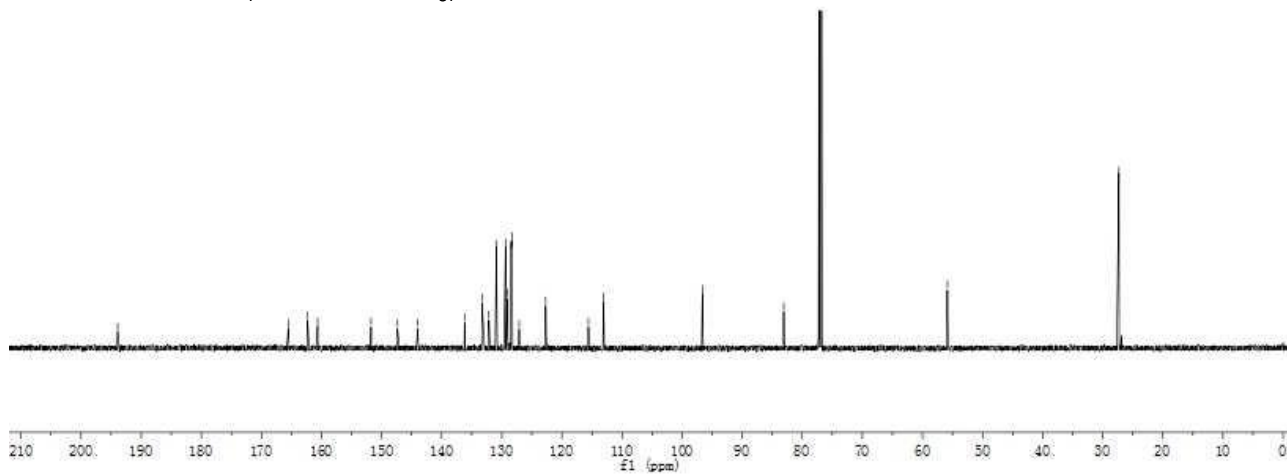

PROTON\_01

8.223  
8.222  
8.210  
8.208  
7.557  
7.552  
7.548  
7.543  
7.539  
7.530  
7.525  
7.520  
7.512  
7.510  
7.260  
7.058  
7.055  
7.041  
4.545  
4.534  
4.522  
4.510  
3.883

1.730  
1.490  
1.479  
1.467  
1.293

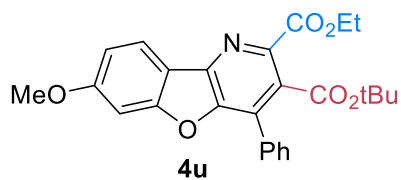

<sup>1</sup>H NMR (600 MHz, CDCl<sub>3</sub>)

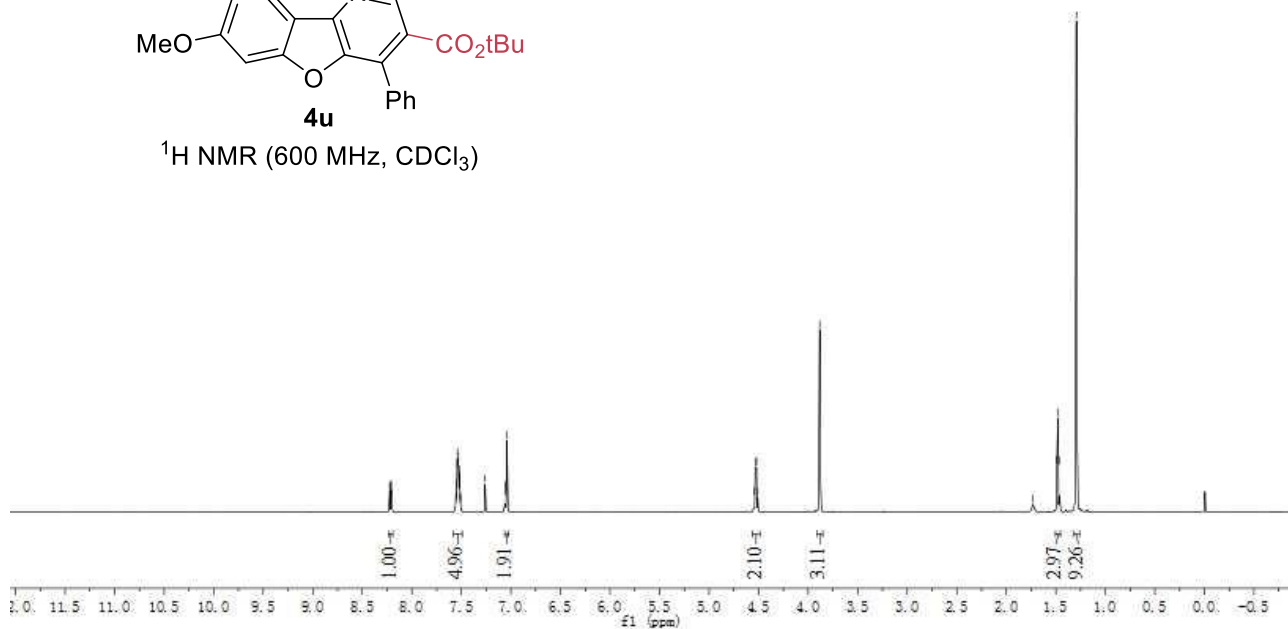

CARBON\_01

165.558  
165.449  
162.292  
160.614  
148.114  
144.447  
142.715  
131.604  
131.328  
129.496  
129.166  
128.906  
128.442  
122.993  
115.387  
112.974

-96.603

-82.967

-62.363

-55.824

-27.563

-14.286

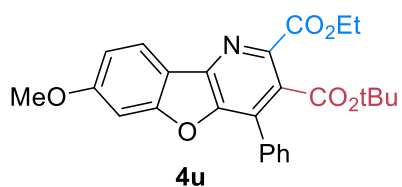

<sup>13</sup>C NMR (150 MHz, CDCl<sub>3</sub>)

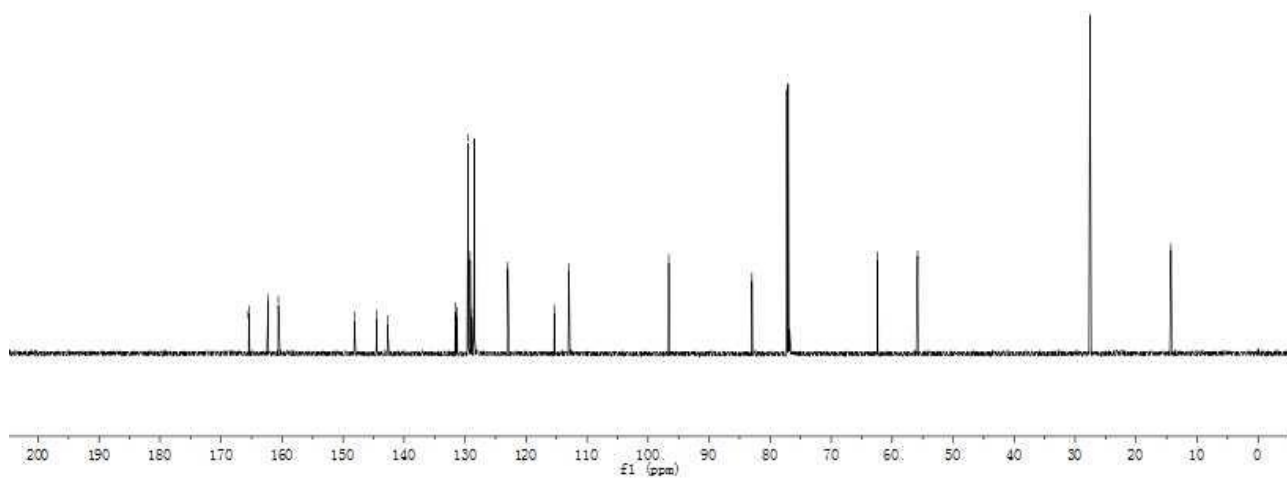

PROTON\_01

8.471  
8.458  
8.176  
8.163  
7.846  
7.833  
7.654  
7.642  
7.630  
7.611  
7.599  
7.586  
7.569  
7.564  
7.556  
7.553  
7.548  
7.536  
7.524  
7.510  
7.253

4.088  
4.076  
4.064  
4.052

0.948  
0.936  
0.924

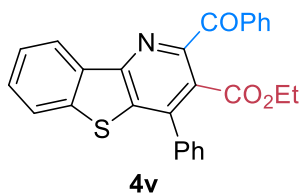

<sup>1</sup>H NMR (600 MHz, CDCl<sub>3</sub>)

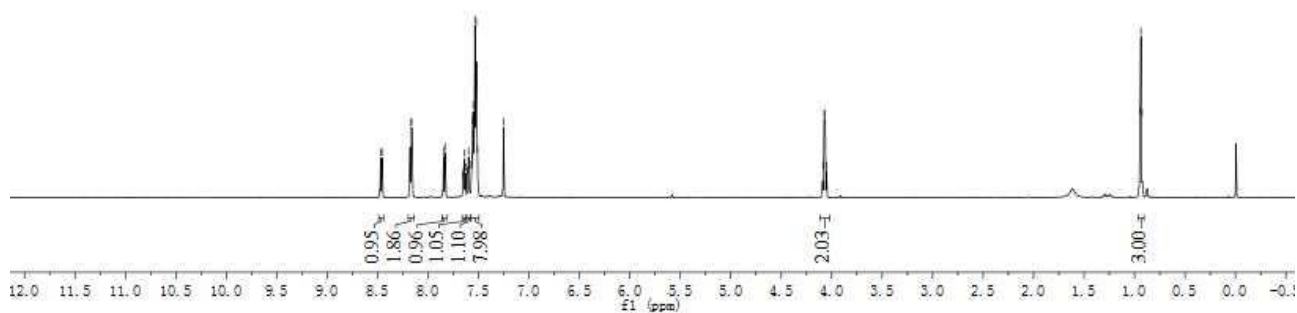

CARBON\_01

193.494  
167.013  
152.348  
151.280  
144.290  
141.340  
136.381  
136.278  
136.002  
134.355  
133.300  
131.194  
129.466  
129.400  
128.852  
128.204  
128.120  
126.492  
125.430  
124.154  
122.894  
61.786  
13.429

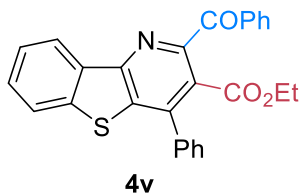

<sup>13</sup>C NMR (150 MHz, CDCl<sub>3</sub>)

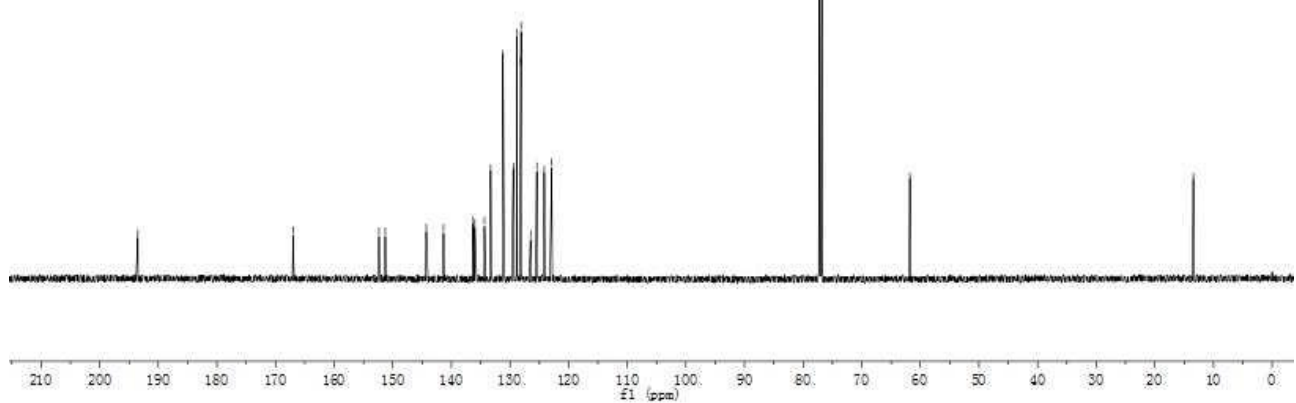



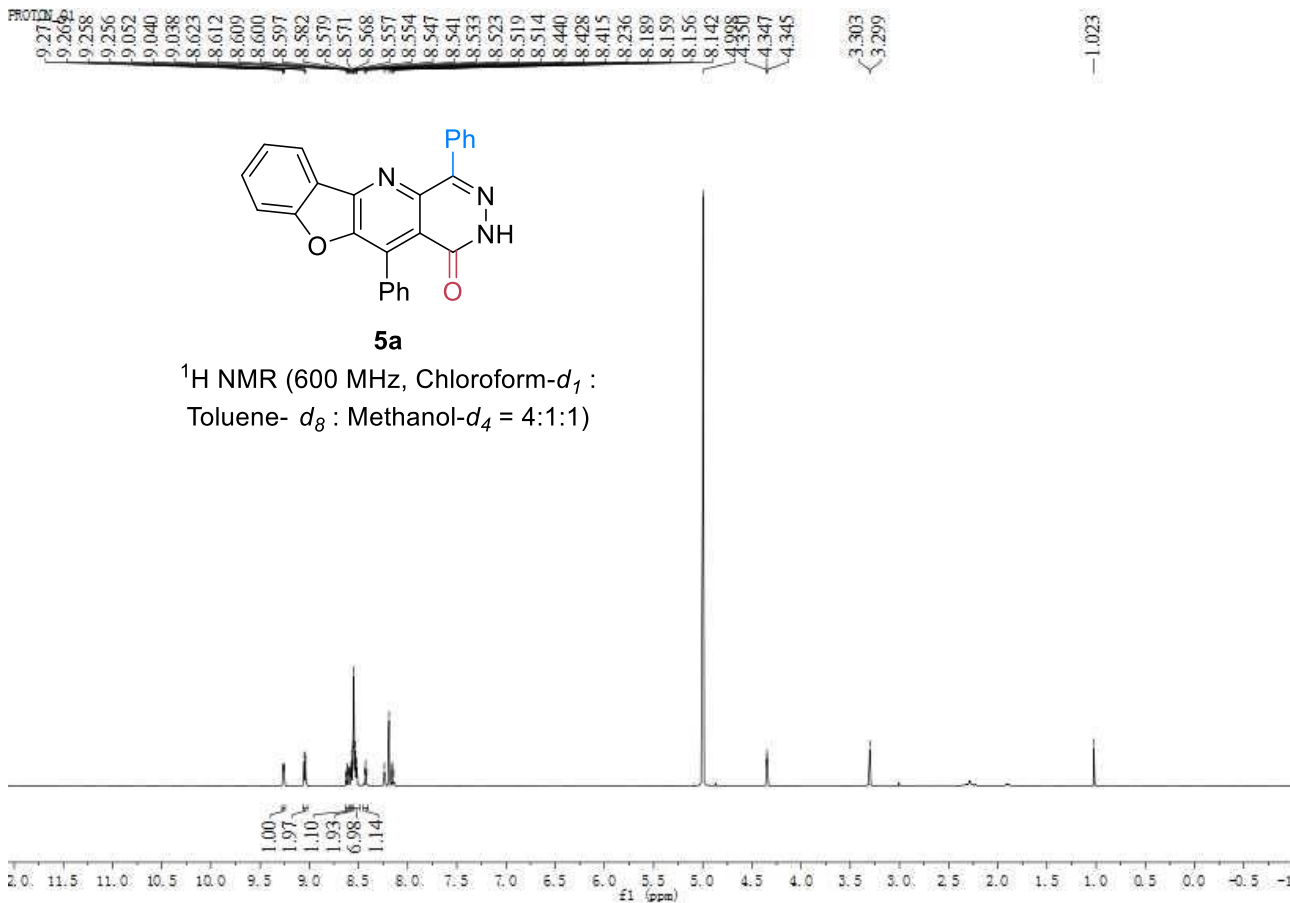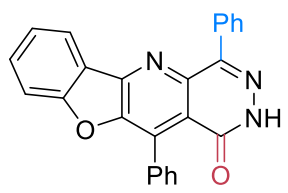

**5a**

<sup>1</sup>H NMR (600 MHz, Chloroform-*d*<sub>1</sub> : Toluene- *d*<sub>8</sub> : Methanol-*d*<sub>4</sub> = 4:1:1)

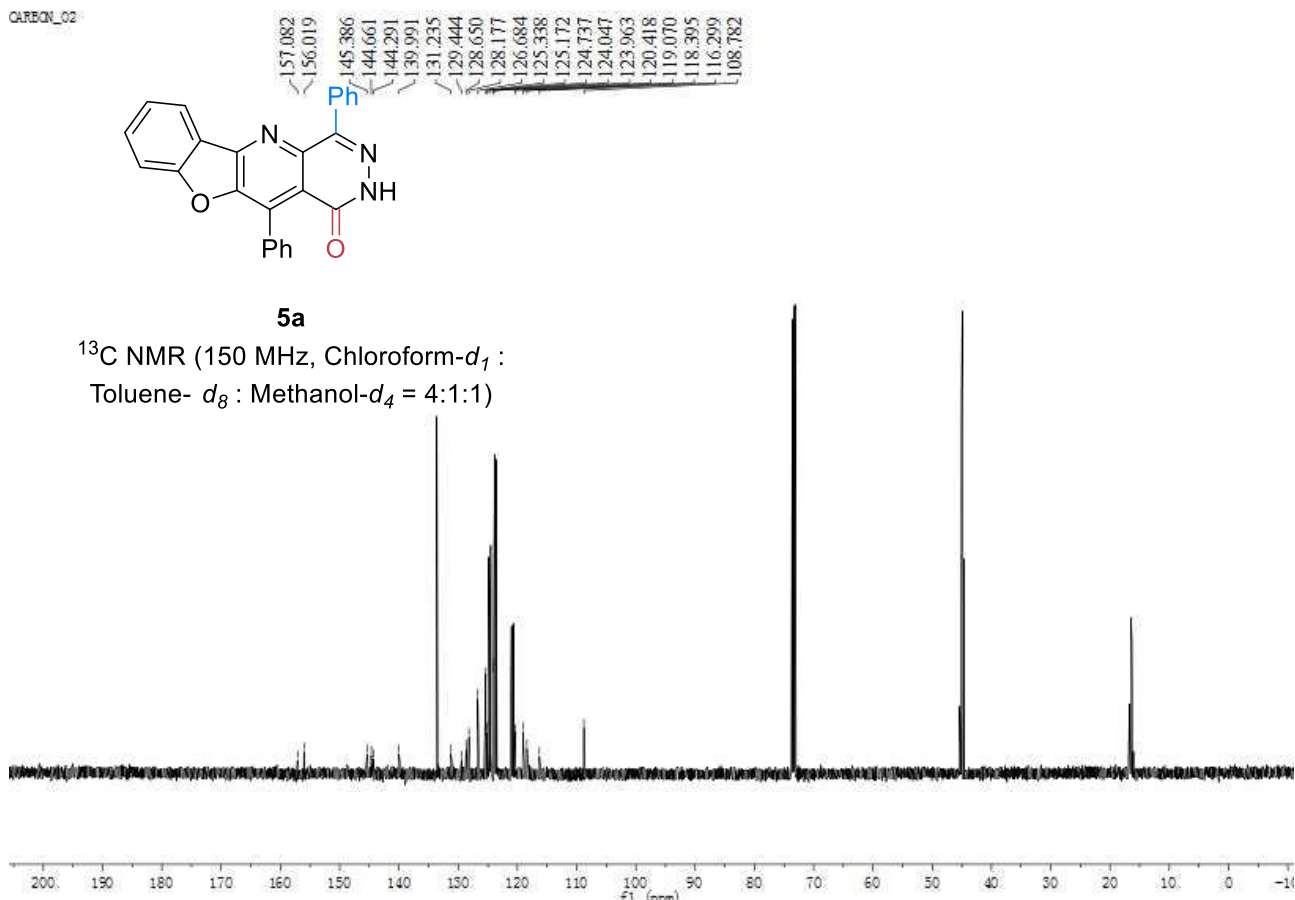

**5a**

<sup>13</sup>C NMR (150 MHz, Chloroform-*d*<sub>1</sub> : Toluene- *d*<sub>8</sub> : Methanol-*d*<sub>4</sub> = 4:1:1)

PROTON\_01

-13.396

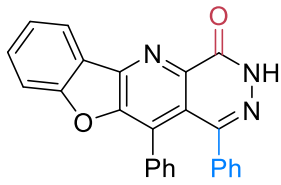

**5b**

<sup>1</sup>H NMR (600 MHz, DMF-d<sub>7</sub>)

8.670  
8.657  
8.014  
8.001  
7.999  
7.988  
7.975  
7.962  
7.888  
7.826  
7.814  
7.548  
7.544  
7.539  
7.536  
7.532  
7.384  
7.373  
7.370  
7.335  
7.330  
7.327  
7.322  
7.319  
7.311  
7.203  
7.191  
7.176  
7.166  
7.163  
7.151

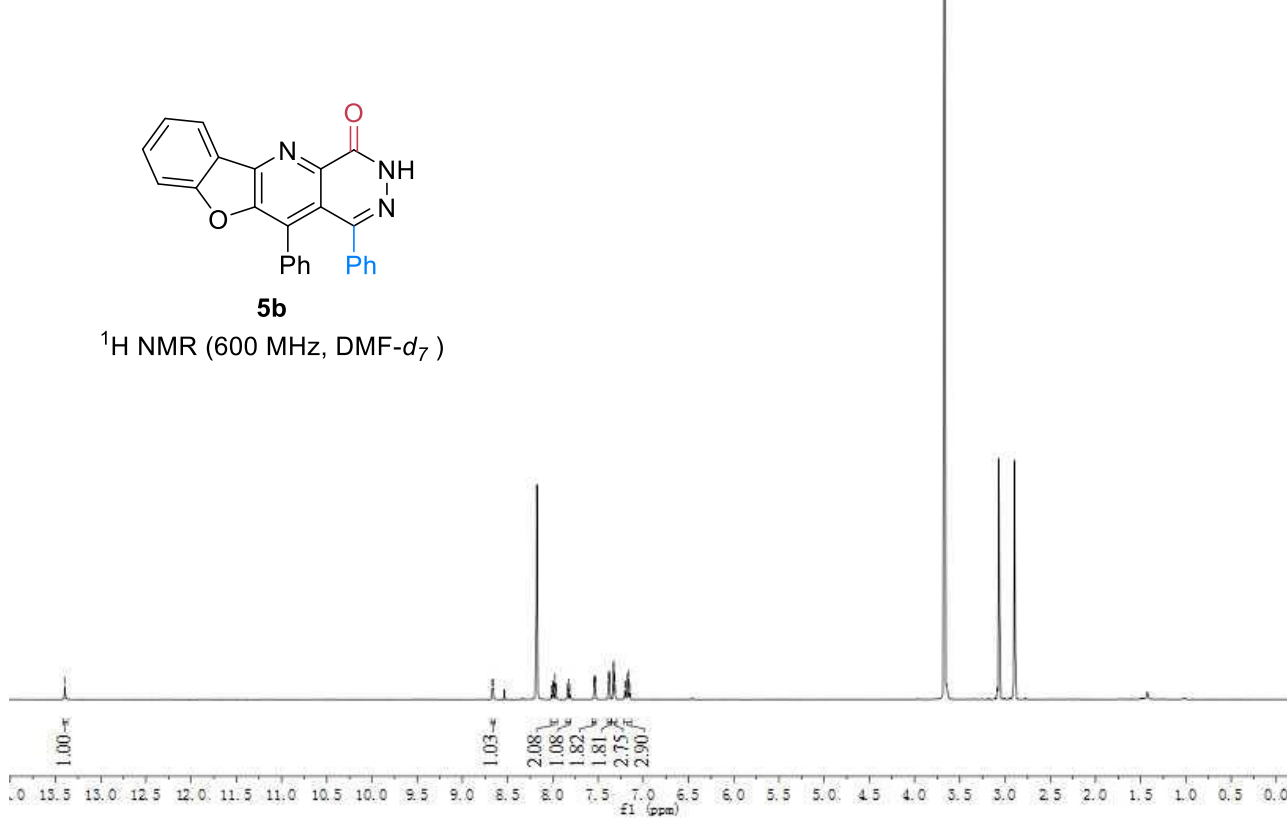

CARBON\_01

163.905  
163.134  
153.908  
151.674  
146.854  
142.221  
136.325  
135.409  
135.085  
133.811  
132.683  
132.030  
131.744  
131.667  
129.197  
127.397  
126.896  
126.799  
126.788  
117.062

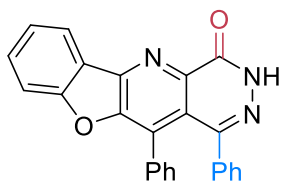

**5b**

<sup>13</sup>C NMR (150MHz, DMF-d<sub>7</sub>)

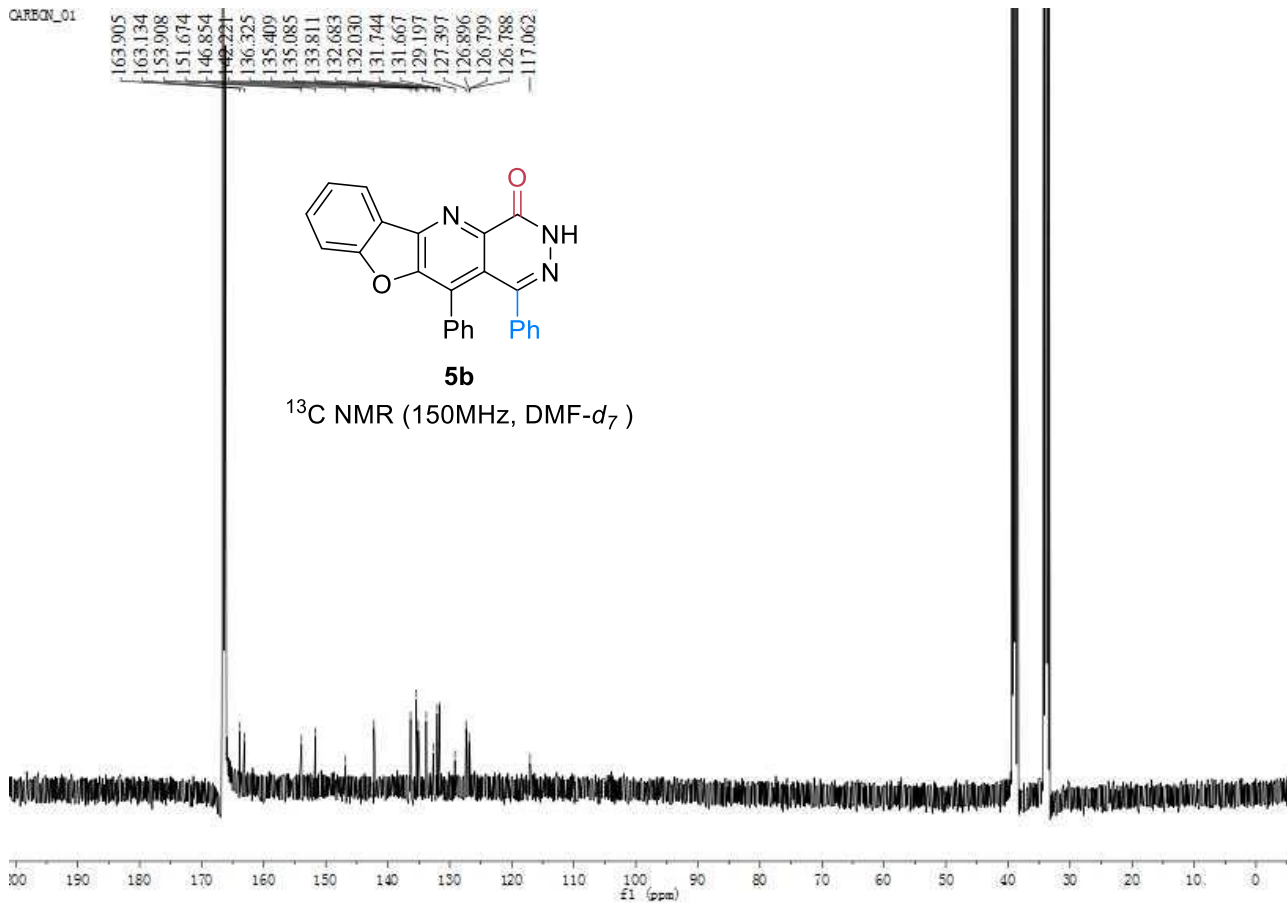

8.2813  
8.2666  
7.914  
7.901  
7.660  
7.648  
7.639  
7.630  
7.626  
7.614  
7.607  
7.596  
7.562  
7.550  
7.484  
7.472  
7.460  
7.448  
7.436  
7.424  
7.410  
7.398  
7.260  
6.539

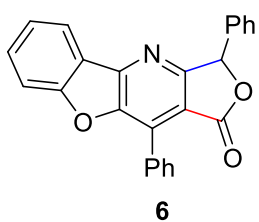

<sup>1</sup>H NMR (600 MHz, CDCl<sub>3</sub>)

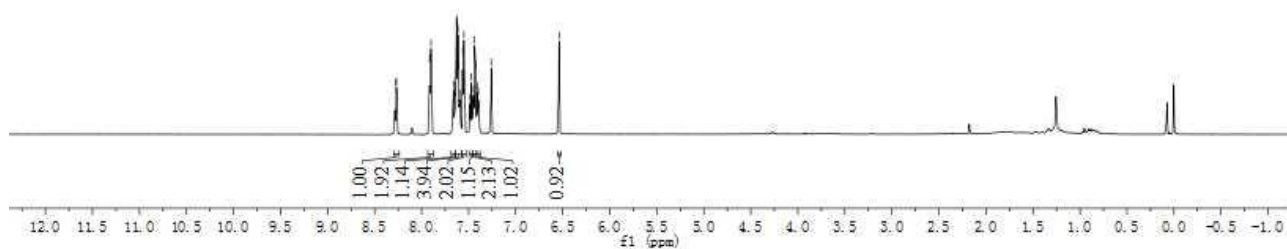

CARBON\_01

167.796  
165.387  
159.595  
150.452  
147.309  
135.699  
133.399  
131.454  
130.887  
130.324  
129.124  
128.818  
128.323  
128.173  
127.064  
124.178  
122.640  
122.223  
113.065  
112.682  
81.304

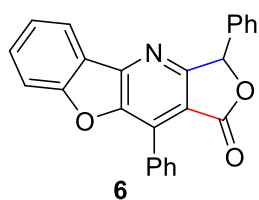

<sup>13</sup>C NMR (150 MHz, CDCl<sub>3</sub>)

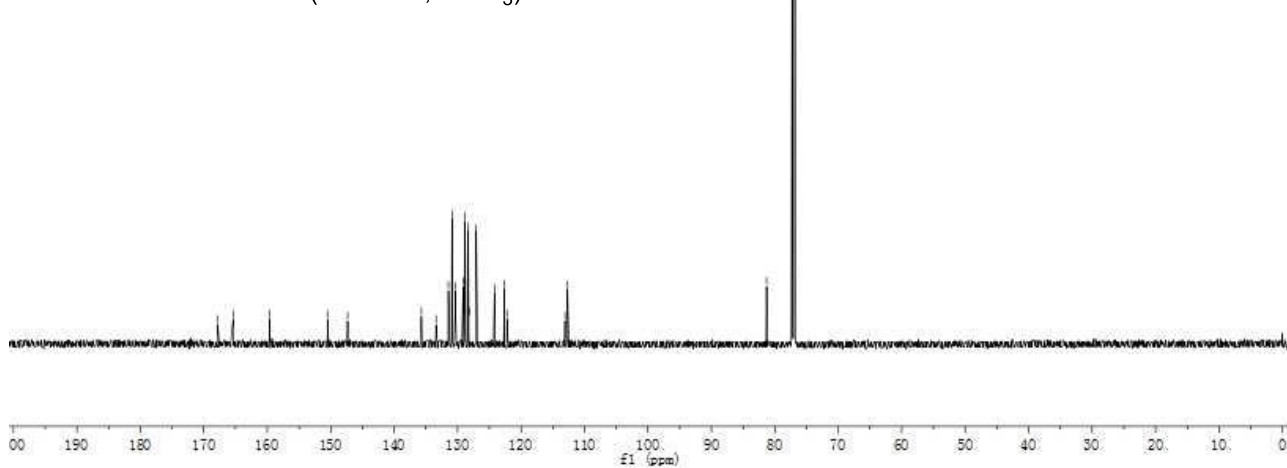

## 9. References

- [1] Rong, Z. Q.; Wang, M.; Chow, C. H. E.; Zhao, Y. *Chem. - Eur. J.* **2016**, *22*, 9483.
- [2]M. J. Frisch, G. W. Trucks, H. B. Schlegel, G. E. Scuseria, M. A. Robb, J. R. Cheeseman, G. Scalmani, V. Barone, B. Mennucci, G. A. Petersson, H. Nakatsuji, M. Caricato, X. Li, H. P. Hratchian, A. F. Izmaylov, J. Bloino, G. Zheng, J. L. Sonnenberg, M. Hada, M. Ehara, K. Toyota, Fukuda, R. J. Hasegawa, M. Ishida, T. Nakajima, Y. Honda, O. Kitao, H. Nakai, T. Vreven, J. A. Montgomery, J. E. Peralta, F. Ogliaro, M. J. Bearpark, J. Heyd, E. N. Brothers, K. N. Kudin, V. N. Staroverov, R. Kobayashi, J. Normand, K. Raghavachari, A. P. Rendell, J. C. Burant, S. S. Iyengar, J. Tomasi, M. Cossi, N. Rega, N. J. Millam, M. Klene, J. E. Knox, J. B. Cross, V. Bakken, C. Adamo, J. Jaramillo, R. Gomperts, R. E. Stratmann, O. Yazyev, A. J. Austin, R. Cammi, C. Pomelli, J. W. Ochterski, R. L. Martin, K. Morokuma, V. G. Zakrzewski, G. A. Voth, P. Salvador, J. J. Dannenberg, S. Dapprich, A. D. Daniels, Ö. Farkas, J. B. Foresman, J. V. Ortiz, J. Cioslowski, D. J. Fox, Gaussian 09, Gaussian, Inc.: Wallingford, CT, USA, 2009.
- [3]Tripos International. Sybyl-X 2.0, Tripos International, St. Louis, MO, US, 2012.
- [4]Zhao, Y.; Truhlar, D. G. *Theor. Chem. Acc.* 2008, *120*, 215.
- [5]Koseki, S.; Schmidt, M. W.; Gordon, M. S. *The Journal of physical chemistry* 1992, *96*, 10768.
- [7]Marenich, A. V.; Cramer, C. J.; Truhlar, D. G. *The Journal of Physical Chemistry B* 2009, *113*, 4538
- [8]Andersson, M. P.; Uvdal, P. *The Journal of Physical Chemistry A* 2005, *109*, 2937.
- [9]GaussView, Version 6, Dennington, Roy; Keith, Todd A.; Millam, John M. Semichem Inc., Shawnee Mission, KS., 2016.
- [10]Version 1.0b; Legault, C. Y. Université de Sherbrooke: Quebec, Canada. <http://www.cylview.org>, 2009.
- [11]Novacek, J.; Roiser, L.; Zielke, K.; Robiette, R.; Waser, M. *Chemistry – A European Journal* 2016, *22*, 11422.

## 10. Computational data

### 2a

Zero-point correction= 0.111168 (Hartree/Particle)  
Thermal correction to Energy= 0.119362  
Thermal correction to Enthalpy= 0.120307  
Thermal correction to Gibbs Free Energy= 0.076420

E(solv) = -2881.25344310 A.U.

|    |             |             |             |
|----|-------------|-------------|-------------|
| Br | 2.26028200  | -0.03387400 | -0.04585100 |
| C  | 0.51455300  | -0.82001700 | 0.14556300  |
| C  | -0.59431000 | 0.21544400  | 0.07199000  |
| O  | -0.46513900 | 1.40805800  | 0.06545000  |
| O  | -1.77239100 | -0.42420400 | 0.03223400  |
| C  | -4.14470200 | -0.46904400 | -0.09431100 |
| C  | -2.93037600 | 0.42872800  | -0.00929100 |
| H  | 0.38225400  | -1.56057200 | -0.64206500 |
| H  | 0.47506200  | -1.32338400 | 1.11214100  |
| H  | -5.05400400 | 0.13713000  | -0.11902900 |
| H  | -4.10969600 | -1.07991700 | -0.99976200 |
| H  | -4.19365400 | -1.13386700 | 0.77161800  |
| H  | -2.93706100 | 1.05127600  | 0.89022900  |
| H  | -2.84353000 | 1.09342300  | -0.87351500 |

### Br-

Zero-point correction= 0.000000 (Hartree/Particle)  
Thermal correction to Energy= 0.001416  
Thermal correction to Enthalpy= 0.002360  
Thermal correction to Gibbs Free Energy= -0.016176

E(solv) = -2574.36309940 A.U.

|    |            |            |            |
|----|------------|------------|------------|
| Br | 0.00000000 | 0.00000000 | 0.00000000 |
|----|------------|------------|------------|

### CO<sub>3</sub><sup>2-</sup>

Zero-point correction= 0.014441 (Hartree/Particle)  
Thermal correction to Energy= 0.017608  
Thermal correction to Enthalpy= 0.018553  
Thermal correction to Gibbs Free Energy= -0.011113

E(solv) = -264.089319664 A.U.

|   |             |             |             |
|---|-------------|-------------|-------------|
| C | -0.00005700 | 0.00004200  | -0.00002600 |
| O | -0.74186700 | 1.07328600  | 0.00000600  |
| O | -0.55863200 | -1.17908800 | 0.00000600  |
| O | 1.30054200  | 0.10577100  | 0.00000600  |

### HCO<sub>3</sub><sup>-</sup>

Zero-point correction= 0.027102 (Hartree/Particle)  
Thermal correction to Energy= 0.030566

|                                          |                |             |             |
|------------------------------------------|----------------|-------------|-------------|
| Thermal correction to Enthalpy=          |                |             | 0.031511    |
| Thermal correction to Gibbs Free Energy= |                |             | 0.001368    |
| E(solv) =                                | -264.575748370 | A.U.        |             |
| C                                        | 0.15217100     | -0.07379100 | 0.00002000  |
| O                                        | 1.24729600     | 0.49634300  | -0.00001900 |
| O                                        | -0.17437500    | -1.27996200 | 0.00000600  |
| O                                        | -0.97360700    | 0.81574700  | 0.00002900  |
| H                                        | -1.70754000    | 0.18572100  | -0.00023800 |

### N-INT1

|                                          |                |      |                             |
|------------------------------------------|----------------|------|-----------------------------|
| Zero-point correction=                   |                |      | 0.303235 (Hartree/Particle) |
| Thermal correction to Energy=            |                |      | 0.318218                    |
| Thermal correction to Enthalpy=          |                |      | 0.319162                    |
| Thermal correction to Gibbs Free Energy= |                |      | 0.259780                    |
| E(solv) =                                | -3226.61543723 | A.U. |                             |

|    |             |             |             |
|----|-------------|-------------|-------------|
| N  | 1.51496900  | -0.26291700 | -0.16085500 |
| C  | 2.05554300  | -0.66765800 | 1.18976300  |
| C  | 3.31703600  | 1.39473800  | -0.50586800 |
| C  | 3.76821200  | -0.89437300 | -0.95748000 |
| C  | 2.24832300  | -1.03898500 | -1.21713700 |
| C  | 1.78689800  | 1.20496400  | -0.36886000 |
| C  | 3.51104100  | -0.15517000 | 1.29062700  |
| N  | 4.02643800  | 0.20669600  | -0.03138600 |
| H  | 1.37653100  | -0.25358500 | 1.93728600  |
| H  | 1.98801900  | -1.75861500 | 1.22309600  |
| H  | 3.63820500  | 2.26245900  | 0.07590100  |
| H  | 3.59932900  | 1.56910600  | -1.54822800 |
| H  | 4.29295600  | -0.70601000 | -1.89776600 |
| H  | 4.17775100  | -1.81113700 | -0.52435500 |
| H  | 1.93946700  | -0.61989700 | -2.17850200 |
| H  | 1.89602400  | -2.07172700 | -1.16119500 |
| H  | 1.22004900  | 1.51772400  | -1.24915100 |
| H  | 1.37471500  | 1.71614800  | 0.50399900  |
| H  | 3.56800800  | 0.72834100  | 1.93264200  |
| H  | 4.15221000  | -0.92519300 | 1.72781900  |
| Br | -2.85172400 | -1.36799300 | -0.06292000 |
| C  | 0.02487000  | -0.57210000 | -0.25373300 |
| C  | -0.76587400 | 0.45088500  | 0.54947700  |
| O  | -0.65821400 | 0.55858200  | 1.75287300  |
| O  | -1.33002500 | 1.35670000  | -0.25074200 |
| C  | -3.44651100 | 2.25503300  | -0.82317900 |
| C  | -2.46668700 | 2.04696900  | 0.30973400  |
| H  | -0.14003400 | -1.56598900 | 0.15916600  |
| H  | -0.26836500 | -0.55065400 | -1.30286900 |
| H  | -4.33880600 | 2.77110700  | -0.45727200 |

|   |             |            |             |
|---|-------------|------------|-------------|
| H | -3.00320700 | 2.85003700 | -1.62731200 |
| H | -3.72883000 | 1.26980000 | -1.20471200 |
| H | -2.89582300 | 1.40164600 | 1.08010900  |
| H | -2.11888400 | 2.98166000 | 0.76213200  |

### N-INT2

|                                          |                             |
|------------------------------------------|-----------------------------|
| Zero-point correction=                   | 0.287938 (Hartree/Particle) |
| Thermal correction to Energy=            | 0.301215                    |
| Thermal correction to Enthalpy=          | 0.302159                    |
| Thermal correction to Gibbs Free Energy= | 0.247402                    |
| E(solv) =                                | -651.759166809 A.U.         |

|   |             |             |             |
|---|-------------|-------------|-------------|
| N | -3.26270200 | 0.38677500  | -0.04537300 |
| C | -3.20099000 | -1.05880100 | 0.15502600  |
| C | -2.59298000 | 0.72021400  | -1.30309100 |
| C | -2.55047200 | 1.04694000  | 1.05078900  |
| C | -1.74495400 | -1.58023600 | 0.05168400  |
| C | -1.13245800 | 0.45628000  | 1.22384200  |
| C | -1.08586500 | 0.37410400  | -1.23449000 |
| N | -0.80883800 | -0.41467900 | 0.02937600  |
| C | 0.57958300  | -0.89561800 | 0.09450700  |
| C | 1.58367500  | 0.06388800  | 0.03757700  |
| O | 1.44384000  | 1.30306900  | 0.03839600  |
| O | 2.84000000  | -0.49229100 | 0.00035400  |
| C | 5.19669600  | -0.35047300 | -0.03845900 |
| C | 3.90681100  | 0.44564600  | -0.01609600 |
| H | -3.62123500 | -1.28297800 | 1.14006700  |
| H | -3.83177000 | -1.54668200 | -0.59376400 |
| H | -2.73577800 | 1.78635100  | -1.50115200 |
| H | -3.08706600 | 0.16574600  | -2.10733100 |
| H | -2.50452600 | 2.11642600  | 0.82544300  |
| H | -3.12987900 | 0.92679500  | 1.97133600  |
| H | -1.44742300 | -2.19828900 | 0.90186900  |
| H | -1.55539400 | -2.14147900 | -0.86724500 |
| H | -0.34215300 | 1.20639900  | 1.25956500  |
| H | -1.04368700 | -0.20414700 | 2.08889300  |
| H | -0.42529900 | 1.24047600  | -1.17592700 |
| H | -0.75245300 | -0.26678300 | -2.05245400 |
| H | 0.71970100  | -1.95330400 | -0.05501600 |
| H | 6.06059500  | 0.32045400  | -0.05270900 |
| H | 5.26584600  | -0.98980200 | 0.84589700  |
| H | 5.23630200  | -0.98909400 | -0.92516000 |
| H | 3.82049300  | 1.09508400  | -0.89437800 |
| H | 3.84950900  | 1.09226400  | 0.86630200  |

### N-TS1

Zero-point correction= 0.300124 (Hartree/Particle)  
 Thermal correction to Energy= 0.315413  
 Thermal correction to Enthalpy= 0.316358  
 Thermal correction to Gibbs Free Energy= 0.254898  
 E(solv) = -3226.56945575 A.U.

Imaginary Frequency 449.05i

|    |             |             |             |
|----|-------------|-------------|-------------|
| N  | 1.45926900  | -0.29052200 | -0.09683700 |
| C  | 2.03814000  | -0.66018200 | 1.21696800  |
| C  | 3.20833300  | 1.40219400  | -0.48765800 |
| C  | 3.66660800  | -0.86797500 | -1.02933500 |
| C  | 2.13019800  | -1.06652500 | -1.16097000 |
| C  | 1.68088300  | 1.15574300  | -0.33532100 |
| C  | 3.52066400  | -0.19509600 | 1.25020500  |
| N  | 3.96056800  | 0.21188700  | -0.08650300 |
| H  | 1.41873700  | -0.19945200 | 1.99046400  |
| H  | 1.94966100  | -1.74749200 | 1.31169700  |
| H  | 3.52600200  | 2.24618700  | 0.13132100  |
| H  | 3.46772300  | 1.63411000  | -1.52526200 |
| H  | 4.10964500  | -0.62205900 | -1.99885100 |
| H  | 4.14933400  | -1.77962900 | -0.66396000 |
| H  | 1.74788200  | -0.70361600 | -2.12035400 |
| H  | 1.83241700  | -2.11456400 | -1.05313000 |
| H  | 1.11143700  | 1.44403600  | -1.22377900 |
| H  | 1.26091000  | 1.68905600  | 0.52248400  |
| H  | 3.64742400  | 0.65838500  | 1.92315700  |
| H  | 4.17251000  | -0.99826500 | 1.60638300  |
| Br | -2.75107900 | -1.54576900 | -0.13426900 |
| C  | -0.40330000 | -0.80007100 | -0.12759700 |
| C  | -0.93561400 | 0.38937400  | 0.59727600  |
| O  | -0.82623100 | 0.56246500  | 1.79001500  |
| O  | -1.41778300 | 1.29975900  | -0.25756600 |
| C  | -2.90231300 | 3.06682600  | -0.78930000 |
| C  | -2.26129600 | 2.29366800  | 0.34142100  |
| H  | -0.21565300 | -1.69917600 | 0.43942000  |
| H  | -0.46678300 | -0.83892900 | -1.20578100 |
| H  | -3.58059400 | 3.82491900  | -0.38883900 |
| H  | -2.14434400 | 3.56639100  | -1.39918200 |
| H  | -3.47208700 | 2.38617300  | -1.42640300 |
| H  | -3.00557500 | 1.77037800  | 0.95014200  |
| H  | -1.66143600 | 2.93038300  | 0.99956900  |

### S-INT1

Zero-point correction= 0.190789 (Hartree/Particle)  
 Thermal correction to Energy= 0.204459  
 Thermal correction to Enthalpy= 0.205403



Thermal correction to Gibbs Free Energy= 0.149140

E(solv) = -3359.23571858 A.U.

|    |             |             |             |
|----|-------------|-------------|-------------|
| Br | -1.97594300 | -1.30014800 | -0.08719900 |
| C  | 0.78359800  | -0.69367400 | -0.63010300 |
| C  | 0.15493400  | 0.23243900  | 0.39327200  |
| O  | 0.44575500  | 0.18992800  | 1.57457600  |
| O  | -0.37065700 | 1.30768200  | -0.21624200 |
| C  | -2.44359100 | 2.44528900  | -0.39304900 |
| C  | -1.34832100 | 2.02570100  | 0.56203900  |
| H  | 0.73751500  | -1.73421200 | -0.31527200 |
| H  | 0.38513500  | -0.56041100 | -1.63283500 |
| H  | -3.22295700 | 2.99423900  | 0.14303100  |
| H  | -2.05093800 | 3.08373000  | -1.18987200 |
| H  | -2.87386800 | 1.53985000  | -0.82925600 |
| H  | -1.73433100 | 1.34419900  | 1.32390400  |
| H  | -0.85299600 | 2.87207600  | 1.05019600  |
| S  | 2.63106000  | -0.30571800 | -0.71834600 |
| C  | 2.68954900  | 1.46825100  | -0.35967100 |
| H  | 2.10829900  | 1.97628700  | -1.13045700 |
| H  | 2.24269300  | 1.64242900  | 0.62128000  |
| H  | 3.73386700  | 1.78166100  | -0.39345400 |
| C  | 3.18440400  | -0.99715500 | 0.86033800  |
| H  | 2.47223300  | -0.69416400 | 1.63216100  |
| H  | 3.19792100  | -2.08243700 | 0.74727000  |
| H  | 4.19425700  | -0.63255500 | 1.05518600  |

## S-INT2

Zero-point correction= 0.176994 (Hartree/Particle)

Thermal correction to Energy= 0.188633

Thermal correction to Enthalpy= 0.189577

Thermal correction to Gibbs Free Energy= 0.138964

E(solv) = -784.419307007 A.U.

|   |             |             |             |
|---|-------------|-------------|-------------|
| C | -0.45922000 | 1.04440700  | -0.00208500 |
| C | 0.51141900  | 0.00768400  | 0.00003000  |
| O | 0.28454400  | -1.20412100 | 0.00242900  |
| O | 1.78258600  | 0.48877300  | -0.00093500 |
| C | 4.13297500  | 0.22962800  | -0.00028100 |
| C | 2.80699700  | -0.50271400 | 0.00084300  |
| H | -0.21947000 | 2.09529300  | -0.00395600 |
| H | 4.96139100  | -0.48433400 | 0.00097100  |
| H | 4.21944900  | 0.86276900  | -0.88731900 |
| H | 4.21931500  | 0.86572400  | 0.88465000  |
| H | 2.69623400  | -1.14146200 | 0.88342400  |
| H | 2.69639200  | -1.14443100 | -0.87960200 |
| S | -2.09324200 | 0.64963500  | -0.00139300 |

|   |             |             |             |
|---|-------------|-------------|-------------|
| C | -2.40282600 | -0.51236700 | -1.36943900 |
| H | -2.28148500 | 0.05266500  | -2.29404700 |
| H | -1.66269100 | -1.31040000 | -1.30107600 |
| H | -3.42254600 | -0.89538400 | -1.28999300 |
| C | -2.40326000 | -0.50654700 | 1.37150400  |
| H | -1.66335300 | -1.30508500 | 1.30650200  |
| H | -2.28181200 | 0.06230400  | 2.29376100  |
| H | -3.42309300 | -0.88960000 | 1.29359900  |

### CSC

|                                          |                             |
|------------------------------------------|-----------------------------|
| Zero-point correction=                   | 0.077217 (Hartree/Particle) |
| Thermal correction to Energy=            | 0.082029                    |
| Thermal correction to Enthalpy=          | 0.082973                    |
| Thermal correction to Gibbs Free Energy= | 0.050268                    |

E(solv) = -477.988618443 A.U.

|   |             |             |             |
|---|-------------|-------------|-------------|
| S | -0.00000100 | -0.66691100 | -0.00000100 |
| C | 1.37266800  | 0.51677300  | -0.00000400 |
| H | 1.34803300  | 1.14633400  | 0.89324100  |
| H | 2.30076400  | -0.05780900 | 0.00017500  |
| H | 1.34821800  | 1.14612100  | -0.89338500 |
| C | -1.37266700 | 0.51677800  | -0.00000300 |
| H | -2.30075200 | -0.05780700 | -0.00001100 |
| H | -1.34812900 | 1.14618500  | 0.89333000  |
| H | -1.34812200 | 1.14625100  | -0.89328700 |

### S-TS1

|                                          |                             |
|------------------------------------------|-----------------------------|
| Zero-point correction=                   | 0.189994 (Hartree/Particle) |
| Thermal correction to Energy=            | 0.203387                    |
| Thermal correction to Enthalpy=          | 0.204332                    |
| Thermal correction to Gibbs Free Energy= | 0.148666                    |

E(solv) = -3359.22376084 A.U.

Imaginary Frequency 333.20i

|    |             |             |             |
|----|-------------|-------------|-------------|
| Br | 1.96608800  | -1.34046500 | 0.08134400  |
| C  | -0.59432300 | -0.77832500 | 0.50901900  |
| C  | -0.15015000 | 0.30107800  | -0.43041200 |
| O  | -0.44211400 | 0.32259300  | -1.60793500 |
| O  | 0.37779600  | 1.33032800  | 0.24217000  |
| C  | 2.44902000  | 2.47502200  | 0.40800500  |
| C  | 1.28985400  | 2.15482000  | -0.51016500 |
| H  | -0.69005600 | -1.76727700 | 0.07845800  |
| H  | -0.25046200 | -0.72279000 | 1.53331600  |
| H  | 3.18862100  | 3.08596800  | -0.11727700 |
| H  | 2.11026900  | 3.02026900  | 1.29338200  |
| H  | 2.91022300  | 1.53373400  | 0.71863700  |
| H  | 1.61810900  | 1.58523800  | -1.38273700 |

|   |             |             |             |
|---|-------------|-------------|-------------|
| H | 0.75301000  | 3.04702300  | -0.84928900 |
| S | -2.63593700 | -0.35929400 | 0.73397600  |
| C | -2.72226000 | 1.42774900  | 0.45200600  |
| H | -2.14862700 | 1.91465700  | 1.24179400  |
| H | -2.28431400 | 1.65919700  | -0.52146600 |
| H | -3.76804900 | 1.73584900  | 0.49737400  |
| C | -3.20774100 | -0.97164600 | -0.87017600 |
| H | -2.51885500 | -0.62199400 | -1.64340300 |
| H | -3.20398400 | -2.06195300 | -0.82054300 |
| H | -4.22583800 | -0.61848000 | -1.04243300 |

**1a**

|                                          |                             |
|------------------------------------------|-----------------------------|
| Zero-point correction=                   | 0.342730 (Hartree/Particle) |
| Thermal correction to Energy=            | 0.365198                    |
| Thermal correction to Enthalpy=          | 0.366142                    |
| Thermal correction to Gibbs Free Energy= | 0.287966                    |

E(solv) = -1527.03699334 A.U.

|   |             |             |             |
|---|-------------|-------------|-------------|
| C | 1.06087200  | 2.25988900  | 0.00117800  |
| C | 2.45607300  | 2.16060800  | 0.00261800  |
| C | 3.29731000  | 3.26201900  | 0.00371200  |
| C | 2.68400000  | 4.51139700  | 0.00324500  |
| C | 1.28771200  | 4.64428700  | 0.00175700  |
| C | 0.46236000  | 3.52688100  | 0.00072300  |
| C | 0.56798100  | 0.87805800  | 0.00067800  |
| C | 1.79711500  | 0.04916300  | 0.00129000  |
| H | 4.37496400  | 3.14180500  | 0.00485200  |
| H | 3.30359800  | 5.40342900  | 0.00403200  |
| H | 0.84469800  | 5.63466300  | 0.00141800  |
| H | -0.61504800 | 3.63856300  | -0.00031400 |
| O | 2.90528000  | 0.86941800  | 0.00283600  |
| C | 1.84073300  | -1.29154000 | -0.00027000 |
| H | 0.85523200  | -1.75345800 | -0.00158500 |
| N | -0.59002500 | 0.30916300  | -0.00012400 |
| C | 2.99060800  | -2.18977500 | -0.00086800 |
| C | 4.32757100  | -1.75389500 | 0.00033700  |
| C | 2.73454900  | -3.57148300 | -0.00301300 |
| C | 5.36516000  | -2.67993300 | -0.00065500 |
| H | 4.54968900  | -0.69353000 | 0.00198200  |
| C | 3.77447100  | -4.49344500 | -0.00398100 |
| H | 1.70379500  | -3.91756000 | -0.00399400 |
| C | 5.09595300  | -4.04916200 | -0.00281900 |
| H | 6.39344100  | -2.33019500 | 0.00022800  |
| H | 3.55472300  | -5.55693700 | -0.00568000 |
| H | 5.91269600  | -4.76510300 | -0.00363200 |
| S | -1.96822400 | 1.26156300  | -0.00261000 |

|   |             |             |             |
|---|-------------|-------------|-------------|
| O | -2.04749400 | 1.99411000  | -1.26402300 |
| O | -2.05040000 | 1.99640700  | 1.25735000  |
| C | -3.21910400 | 0.00281100  | -0.00255900 |
| C | -3.69971000 | -0.47465600 | -1.21591800 |
| C | -3.68791600 | -0.48671900 | 1.21350600  |
| C | -4.67071900 | -1.47301000 | -1.20511700 |
| H | -3.32346900 | -0.06186700 | -2.14715300 |
| C | -4.65693600 | -1.48317800 | 1.20322300  |
| H | -3.30221600 | -0.08158200 | 2.14422200  |
| C | -5.16009700 | -1.98969800 | -0.00189700 |
| H | -5.05699900 | -1.85355100 | -2.14723000 |
| H | -5.03477700 | -1.87316800 | 2.14549800  |
| C | -6.22693400 | -3.05423900 | 0.00962900  |
| H | -7.18583300 | -2.63757400 | 0.33737500  |
| H | -6.37029000 | -3.48505800 | -0.98466900 |
| H | -5.96784300 | -3.86379300 | 0.69918700  |

**cis-7**

|                                          |                             |
|------------------------------------------|-----------------------------|
| Zero-point correction=                   | 0.447012 (Hartree/Particle) |
| Thermal correction to Energy=            | 0.475473                    |
| Thermal correction to Enthalpy=          | 0.476417                    |
| Thermal correction to Gibbs Free Energy= | 0.385184                    |

E(solv) = -1833.52483597 A.U.

|   |             |             |             |
|---|-------------|-------------|-------------|
| C | 0.94894600  | 2.28973500  | 0.52609200  |
| C | 0.67552300  | 3.13745900  | -0.57039200 |
| C | 1.10275900  | 4.45552900  | -0.63525400 |
| C | 1.81541100  | 4.93351200  | 0.45681300  |
| C | 2.08932600  | 4.11575600  | 1.56590200  |
| C | 1.66746100  | 2.79507500  | 1.61777700  |
| C | 0.35026800  | 1.04122200  | 0.12757300  |
| C | -0.20051700 | 1.23106600  | -1.08497500 |
| H | 0.87711800  | 5.07140100  | -1.49840200 |
| H | 2.16370100  | 5.96122900  | 0.45354700  |
| H | 2.64250300  | 4.52907400  | 2.40298500  |
| H | 1.87279400  | 2.16092500  | 2.47294500  |
| O | -0.05126600 | 2.50004400  | -1.54315100 |
| C | -1.09928200 | 0.12106600  | -1.51596900 |
| H | -0.92067200 | -0.23517800 | -2.53453500 |
| N | 0.00496600  | -0.23124400 | 0.64278200  |
| C | -2.58003200 | 0.42627300  | -1.34662400 |
| C | -3.03092300 | 1.38455600  | -0.43798900 |
| C | -3.51209800 | -0.33384500 | -2.05643400 |
| C | -4.39517100 | 1.58000700  | -0.24444100 |
| H | -2.31427300 | 1.97383000  | 0.12782300  |
| C | -4.87700800 | -0.14460900 | -1.85648200 |

|   |             |             |             |
|---|-------------|-------------|-------------|
| H | -3.16485300 | -1.09265000 | -2.75330300 |
| C | -5.32138900 | 0.81361100  | -0.94880700 |
| H | -4.73506300 | 2.33028500  | 0.46291900  |
| H | -5.59155100 | -0.74363000 | -2.41259600 |
| H | -6.38508000 | 0.96605400  | -0.79406000 |
| S | 1.12912100  | -1.07940600 | 1.56173400  |
| O | 0.50081700  | -2.35952600 | 1.83239300  |
| O | 1.54403900  | -0.16540300 | 2.61022000  |
| C | 2.51598900  | -1.36126600 | 0.48924500  |
| C | 2.62141100  | -2.57749100 | -0.18002200 |
| C | 3.44279600  | -0.33873700 | 0.29126300  |
| C | 3.68069600  | -2.76815000 | -1.06173400 |
| H | 1.89010900  | -3.35845700 | 0.00512900  |
| C | 4.49088400  | -0.54959400 | -0.59454200 |
| H | 3.34658000  | 0.59786500  | 0.83311800  |
| C | 4.62549800  | -1.76264300 | -1.28001500 |
| H | 3.77638400  | -3.71473600 | -1.58622900 |
| H | 5.22121200  | 0.23852100  | -0.75654900 |
| C | 5.78721700  | -1.98462900 | -2.21309800 |
| H | 6.01843100  | -1.07813300 | -2.77903200 |
| H | 6.68587800  | -2.25951900 | -1.65014900 |
| H | 5.57945400  | -2.78976800 | -2.92192000 |
| C | -0.57109000 | -0.97854100 | -0.50521500 |
| H | 0.21377000  | -1.55033200 | -1.01568400 |
| C | -1.67279800 | -1.95208700 | -0.13556300 |
| O | -2.38314100 | -1.55284900 | 0.90808600  |
| O | -1.90980900 | -2.92018100 | -0.81769800 |
| C | -3.56067100 | -2.32768700 | 1.18345000  |
| H | -4.14151300 | -2.40954500 | 0.25932600  |
| H | -3.25265700 | -3.33306200 | 1.48507900  |
| C | -4.31926400 | -1.60105800 | 2.27125000  |
| H | -5.22815500 | -2.15289500 | 2.52590100  |
| H | -3.70435800 | -1.50422600 | 3.16923600  |
| H | -4.59921500 | -0.60171500 | 1.92758300  |

### N-INT3-RR-1

|                                          |                |            |                             |
|------------------------------------------|----------------|------------|-----------------------------|
| Zero-point correction=                   |                |            | 0.637563 (Hartree/Particle) |
| Thermal correction to Energy=            |                |            | 0.672007                    |
| Thermal correction to Enthalpy=          |                |            | 0.672951                    |
| Thermal correction to Gibbs Free Energy= |                |            | 0.571986                    |
| E(solv) =                                | -2178.80140443 | A.U.       |                             |
| C                                        | -3.47110600    | 0.05464400 | -0.11843400                 |
| C                                        | -3.66716100    | 1.43179800 | -0.28609600                 |
| C                                        | -4.90246000    | 2.00660400 | -0.54989400                 |
| C                                        | -5.98376700    | 1.13886200 | -0.62413600                 |

|   |             |             |             |
|---|-------------|-------------|-------------|
| C | -5.82086200 | -0.24454500 | -0.44182800 |
| C | -4.57493500 | -0.80271300 | -0.19501300 |
| C | -2.04915900 | -0.08277300 | 0.13900200  |
| C | -1.54310700 | 1.17303100  | 0.12258300  |
| H | -5.00415500 | 3.07818700  | -0.68061800 |
| H | -6.97297700 | 1.53864400  | -0.82438700 |
| H | -6.69010500 | -0.89166200 | -0.50222100 |
| H | -4.44387100 | -1.87232700 | -0.08346000 |
| O | -2.49599800 | 2.11690700  | -0.13547200 |
| C | -0.15212600 | 1.64326200  | 0.40421800  |
| H | -0.16328300 | 2.17248900  | 1.36844400  |
| N | -1.28110500 | -1.16477400 | 0.59889100  |
| C | 0.24274700  | 2.61660600  | -0.70203900 |
| C | 0.37140100  | 3.97704800  | -0.42873600 |
| C | 0.43402400  | 2.17036800  | -2.01219700 |
| C | 0.72106500  | 4.87559000  | -1.43418300 |
| H | 0.19519600  | 4.33658700  | 0.58301600  |
| C | 0.78900800  | 3.06388400  | -3.01766000 |
| H | 0.29929700  | 1.11611400  | -2.24668800 |
| C | 0.94002800  | 4.41967200  | -2.73030900 |
| H | 0.81827900  | 5.93231000  | -1.20424100 |
| H | 0.93830900  | 2.70224600  | -4.03066700 |
| H | 1.21432700  | 5.11651400  | -3.51610000 |
| S | -1.27105000 | -2.60173800 | -0.26083100 |
| O | -2.38260400 | -2.50025300 | -1.20054600 |
| O | -1.18563700 | -3.72207300 | 0.65201400  |
| C | 0.21833300  | -2.56597800 | -1.24122000 |
| C | 0.23064800  | -1.79890500 | -2.40268500 |
| C | 1.34241000  | -3.27272300 | -0.82788500 |
| C | 1.40671400  | -1.71479600 | -3.14435500 |
| H | -0.67586700 | -1.28862100 | -2.71832000 |
| C | 2.50032700  | -3.19743900 | -1.59472000 |
| H | 1.29188400  | -3.84644000 | 0.09157300  |
| C | 2.55268800  | -2.41418300 | -2.75364200 |
| H | 1.42887000  | -1.11557700 | -4.05145500 |
| H | 3.38393500  | -3.75306600 | -1.28855100 |
| C | 3.80980500  | -2.36233100 | -3.58432900 |
| H | 3.87231400  | -3.23402400 | -4.24496800 |
| H | 3.83556200  | -1.46871600 | -4.21347800 |
| H | 4.70397200  | -2.36646100 | -2.95402300 |
| C | 0.70323600  | 0.36395600  | 0.54619400  |
| C | -0.01711200 | -0.77606200 | 1.41425400  |
| O | 0.70865900  | -1.78953700 | 1.68631400  |
| O | -0.54603100 | -0.03864600 | 2.52371000  |
| C | -2.69249800 | -0.46625300 | 3.54017700  |

|   |             |             |             |
|---|-------------|-------------|-------------|
| C | -1.22676900 | -0.85953300 | 3.47051400  |
| H | 0.87993900  | -0.06266000 | -0.44630400 |
| H | -3.20219500 | -1.02541900 | 4.33146900  |
| H | -2.79403000 | 0.60291100  | 3.75188500  |
| H | -3.19233700 | -0.67625000 | 2.59034200  |
| H | -1.10132400 | -1.90927600 | 3.18854600  |
| H | -0.74064300 | -0.71218100 | 4.44371800  |
| N | 2.12293100  | 0.59498800  | 1.09621500  |
| C | 2.76854300  | 1.85502000  | 0.58003600  |
| C | 4.33675300  | -0.49212400 | 1.39749300  |
| C | 3.58856800  | 1.03425200  | 3.05580000  |
| C | 2.16102500  | 0.64538900  | 2.61244200  |
| C | 3.00159600  | -0.55638100 | 0.63011600  |
| C | 4.27466100  | 1.83016800  | 0.94082700  |
| N | 4.55242400  | 0.83778900  | 1.97255900  |
| H | 2.60536400  | 1.89893600  | -0.49691300 |
| H | 2.24723500  | 2.69604100  | 1.04101400  |
| H | 5.16549000  | -0.73283100 | 0.72476800  |
| H | 4.34665300  | -1.22101600 | 2.21327100  |
| H | 3.88211500  | 0.42227100  | 3.91306900  |
| H | 3.63800400  | 2.08306800  | 3.36568600  |
| H | 1.85797500  | -0.34950200 | 2.93827500  |
| H | 1.39920200  | 1.35639900  | 2.93334500  |
| H | 2.42644000  | -1.46224900 | 0.82395900  |
| H | 3.12427400  | -0.41179900 | -0.44876800 |
| H | 4.87728800  | 1.58963000  | 0.05990000  |
| H | 4.58367600  | 2.81786300  | 1.29460200  |

### N-INT3-RR

|                                          |                             |
|------------------------------------------|-----------------------------|
| Zero-point correction=                   | 0.636697 (Hartree/Particle) |
| Thermal correction to Energy=            | 0.672127                    |
| Thermal correction to Enthalpy=          | 0.673072                    |
| Thermal correction to Gibbs Free Energy= | 0.569611                    |
| E(solv) = -2178.81562285                 | A.U.                        |

|   |            |             |             |
|---|------------|-------------|-------------|
| C | 2.51489100 | -2.01645900 | -0.68239200 |
| C | 3.62003000 | -1.18211400 | -0.44554300 |
| C | 4.91662400 | -1.65572400 | -0.27815100 |
| C | 5.08748500 | -3.03215600 | -0.33415900 |
| C | 3.99936800 | -3.89176300 | -0.56497300 |
| C | 2.71372000 | -3.40323500 | -0.74594000 |
| C | 1.37258200 | -1.11559800 | -0.79240900 |
| C | 1.89685700 | 0.12754000  | -0.61824100 |
| H | 5.74024400 | -0.97190500 | -0.10324900 |
| H | 6.08003600 | -3.45137000 | -0.19964300 |
| H | 4.17149900 | -4.96263000 | -0.60715200 |

|   |             |             |             |
|---|-------------|-------------|-------------|
| H | 1.88134500  | -4.07295900 | -0.93217300 |
| O | 3.25705100  | 0.12476700  | -0.39639200 |
| C | 1.10607900  | 1.38175800  | -0.49867300 |
| H | 0.42548600  | 1.36676100  | -1.35895200 |
| N | 0.00926400  | -1.26774200 | -0.93775400 |
| C | 1.99107500  | 2.61198700  | -0.58871900 |
| C | 2.83349200  | 2.94882100  | 0.47424500  |
| C | 2.01213400  | 3.39715400  | -1.74119200 |
| C | 3.65933100  | 4.06495100  | 0.39528000  |
| H | 2.86288200  | 2.30927200  | 1.35434900  |
| C | 2.83821900  | 4.51574200  | -1.82331600 |
| H | 1.38556600  | 3.12378900  | -2.58805900 |
| C | 3.65858400  | 4.85613500  | -0.75191400 |
| H | 4.31309900  | 4.31122400  | 1.22626000  |
| H | 2.84285400  | 5.11787300  | -2.72669000 |
| H | 4.30264600  | 5.72775000  | -0.81317200 |
| S | -0.60070000 | -2.73297600 | -0.74344300 |
| O | -0.19458500 | -3.36507600 | 0.52801700  |
| O | -0.50554900 | -3.58903000 | -1.93309700 |
| C | -2.32124200 | -2.28428400 | -0.56186700 |
| C | -2.90014500 | -2.28940600 | 0.69948300  |
| C | -3.05003900 | -1.89180500 | -1.68246700 |
| C | -4.22117700 | -1.86469900 | 0.84327700  |
| H | -2.30487500 | -2.60624900 | 1.54920700  |
| C | -4.36668400 | -1.47360100 | -1.52560300 |
| H | -2.58165000 | -1.93350500 | -2.66181500 |
| C | -4.96816500 | -1.44647800 | -0.26010000 |
| H | -4.68324100 | -1.87018200 | 1.82785800  |
| H | -4.94661600 | -1.17506800 | -2.39663700 |
| C | -6.39040800 | -0.96794200 | -0.10153800 |
| H | -7.03609100 | -1.38304200 | -0.88113300 |
| H | -6.80047300 | -1.25972400 | 0.86885800  |
| H | -6.45685600 | 0.12490500  | -0.17584100 |
| N | -3.50846700 | 3.05181100  | -0.04999100 |
| N | -1.20475900 | 2.00507800  | 0.47293800  |
| C | -3.29088700 | 1.84004500  | -0.85078200 |
| H | -4.17754000 | 1.20362800  | -0.80164200 |
| H | -3.15579200 | 2.14227700  | -1.89428100 |
| C | -2.44067400 | 3.99850000  | -0.35310100 |
| H | -2.59935600 | 4.42234900  | -1.34832100 |
| H | -2.48752600 | 4.81986400  | 0.36862200  |
| C | -3.40986600 | 2.69648100  | 1.36466100  |
| H | -3.77247700 | 3.52629600  | 1.97837200  |
| H | -4.05477900 | 1.83171000  | 1.54789900  |
| C | -1.94759200 | 2.36873700  | 1.74523100  |



|   |             |             |             |
|---|-------------|-------------|-------------|
| H | -1.42223900 | 3.23290500  | 2.16350100  |
| H | -1.87820800 | 1.52633400  | 2.42742400  |
| C | -2.07966400 | 1.04336500  | -0.32583400 |
| H | -2.37233700 | 0.25965700  | 0.37163600  |
| H | -1.46266600 | 0.56959000  | -1.09284600 |
| C | -1.06507500 | 3.29543900  | -0.30822300 |
| H | -0.71998700 | 3.03071900  | -1.30663200 |
| H | -0.28690600 | 3.89194300  | 0.17459600  |
| C | 0.17764800  | 1.44322700  | 0.78875000  |
| H | 0.61247600  | 2.18749900  | 1.46696900  |
| C | 0.06914500  | 0.16090400  | 1.63120000  |
| O | 1.27510100  | -0.20171200 | 2.01863100  |
| O | -0.96388700 | -0.34941200 | 2.00336900  |
| C | 1.34857200  | -1.46902200 | 2.73148300  |
| H | 0.74548300  | -1.37170400 | 3.63946900  |
| H | 0.90456600  | -2.23349300 | 2.08625900  |
| C | 2.80554600  | -1.72864000 | 3.03337100  |
| H | 2.89040200  | -2.65434100 | 3.60911200  |
| H | 3.37829100  | -1.84651900 | 2.11016500  |
| H | 3.23803900  | -0.91350900 | 3.62114700  |

### N-INT3-SR-1

|                                          |                             |
|------------------------------------------|-----------------------------|
| Zero-point correction=                   | 0.637389 (Hartree/Particle) |
| Thermal correction to Energy=            | 0.672574                    |
| Thermal correction to Enthalpy=          | 0.673518                    |
| Thermal correction to Gibbs Free Energy= | 0.570299                    |

E(solv) = -2178.81092197 A.U.

|   |            |             |             |
|---|------------|-------------|-------------|
| C | 2.96445500 | -1.53391000 | -0.65147700 |
| C | 3.39277700 | -0.61636100 | -1.61493900 |
| C | 4.54613500 | -0.77198500 | -2.37369200 |
| C | 5.30079500 | -1.90941600 | -2.12096500 |
| C | 4.90721100 | -2.84090400 | -1.14504000 |
| C | 3.74596300 | -2.66992200 | -0.40479900 |
| C | 1.73627500 | -0.97376400 | -0.07929400 |
| C | 1.56174900 | 0.21334100  | -0.74456800 |
| H | 4.83361000 | -0.03287400 | -3.11333700 |
| H | 6.21242100 | -2.07949100 | -2.68562800 |
| H | 5.52411900 | -3.71703400 | -0.97164300 |
| H | 3.42389000 | -3.40041200 | 0.32704700  |
| O | 2.54566900 | 0.44488700  | -1.68404000 |
| C | 0.53842800 | 1.31731600  | -0.70715100 |
| H | 0.06825400 | 1.29863900  | -1.69667600 |
| N | 0.99003600 | -1.40596100 | 1.01138800  |
| C | 1.15289600 | 2.71402300  | -0.58035500 |
| C | 2.34527000 | 2.93012800  | 0.11534000  |

|   |             |             |             |
|---|-------------|-------------|-------------|
| C | 0.56137900  | 3.79872900  | -1.23305400 |
| C | 2.89233900  | 4.20559800  | 0.20200500  |
| H | 2.84510000  | 2.08418600  | 0.57438700  |
| C | 1.10138000  | 5.07999600  | -1.14388900 |
| H | -0.32271800 | 3.64456400  | -1.85072100 |
| C | 2.26724200  | 5.28752200  | -0.41474100 |
| H | 3.82002200  | 4.35330200  | 0.74622500  |
| H | 0.62289200  | 5.90653200  | -1.66022500 |
| H | 2.69898900  | 6.28102200  | -0.34611300 |
| S | 0.39886300  | -2.87734500 | 1.06208900  |
| O | 0.02769700  | -3.17777400 | 2.44548400  |
| O | 1.15968700  | -3.87772600 | 0.30433900  |
| C | -1.18663100 | -2.79167400 | 0.18781700  |
| C | -2.37190800 | -3.06636100 | 0.86629800  |
| C | -1.22197400 | -2.44945900 | -1.16499300 |
| C | -3.58999500 | -3.00037500 | 0.19192300  |
| H | -2.31382000 | -3.33713900 | 1.91603700  |
| C | -2.44780700 | -2.37418500 | -1.82743400 |
| H | -0.29061400 | -2.26788800 | -1.69711600 |
| C | -3.64824900 | -2.65258900 | -1.16231900 |
| H | -4.51209100 | -3.23165600 | 0.72139300  |
| H | -2.47300100 | -2.12533100 | -2.88710700 |
| C | -4.96792600 | -2.62610800 | -1.89395100 |
| H | -4.88814000 | -2.09144100 | -2.84504900 |
| H | -5.30825400 | -3.64290400 | -2.11737700 |
| H | -5.75080400 | -2.14809500 | -1.29591700 |
| N | -4.46365400 | 1.89746100  | -0.44776600 |
| N | -1.98250200 | 1.35812900  | 0.03130600  |
| C | -4.35065400 | 0.93148800  | 0.64752500  |
| H | -4.63122500 | 1.43066200  | 1.57942800  |
| H | -5.05112300 | 0.10692900  | 0.48277900  |
| C | -3.82858500 | 1.31073800  | -1.62555400 |
| H | -4.23591000 | 0.30560200  | -1.77588100 |
| H | -4.06755600 | 1.90951400  | -2.50873800 |
| C | -3.72827100 | 3.10864000  | -0.07923900 |
| H | -3.65471200 | 3.74622100  | -0.96569800 |
| H | -4.29446200 | 3.65771400  | 0.67753800  |
| C | -2.32547500 | 2.76068300  | 0.47800200  |
| H | -1.53865200 | 3.42376800  | 0.11341000  |
| H | -2.30062200 | 2.74638600  | 1.56618500  |
| C | -2.91971500 | 0.37048200  | 0.72097800  |
| H | -2.56607300 | 0.22803800  | 1.73854300  |
| H | -2.81257500 | -0.56050200 | 0.16241900  |
| C | -2.29539100 | 1.24720200  | -1.44288500 |
| H | -1.87261000 | 0.30270300  | -1.79446300 |

|   |             |             |             |
|---|-------------|-------------|-------------|
| H | -1.79854300 | 2.07924300  | -1.94182700 |
| C | -0.54719100 | 0.93068100  | 0.33227500  |
| H | -0.59457200 | -0.16551100 | 0.30978000  |
| C | -0.19170400 | 1.19357800  | 1.80299700  |
| O | 1.10511500  | 1.15070900  | 1.98296400  |
| O | -1.00940800 | 1.31853000  | 2.68956300  |
| C | 1.56001700  | 0.70667900  | 3.28383100  |
| H | 1.36127500  | 1.49889700  | 4.01071300  |
| H | 0.98132600  | -0.18566100 | 3.53589300  |
| C | 3.02907400  | 0.38702400  | 3.13442600  |
| H | 3.42221600  | 0.01759800  | 4.08533900  |
| H | 3.15394700  | -0.39080200 | 2.37632900  |
| H | 3.59951000  | 1.27535100  | 2.84721800  |

### N-INT3-SR

|                                          |                             |
|------------------------------------------|-----------------------------|
| Zero-point correction=                   | 0.637223 (Hartree/Particle) |
| Thermal correction to Energy=            | 0.672875                    |
| Thermal correction to Enthalpy=          | 0.673820                    |
| Thermal correction to Gibbs Free Energy= | 0.567924                    |

E(solv) = -2178.81566501 A.U.

|   |             |             |             |
|---|-------------|-------------|-------------|
| C | 1.24042800  | 3.04743900  | 0.46720700  |
| C | 2.59229700  | 2.70663800  | 0.61657600  |
| C | 3.62691200  | 3.63118900  | 0.54791600  |
| C | 3.26369300  | 4.94974000  | 0.30434700  |
| C | 1.91702400  | 5.31754000  | 0.14183400  |
| C | 0.89546800  | 4.38152900  | 0.22058800  |
| C | 0.51024300  | 1.79781600  | 0.62655900  |
| C | 1.46965200  | 0.85659000  | 0.83418900  |
| H | 4.66044000  | 3.32865400  | 0.68140400  |
| H | 4.03659500  | 5.70917800  | 0.23441400  |
| H | 1.67444100  | 6.35741900  | -0.05425600 |
| H | -0.14497000 | 4.64914900  | 0.07092300  |
| O | 2.74378600  | 1.36893100  | 0.84327500  |
| C | 1.20771800  | -0.61858500 | 0.89209200  |
| H | 0.36475200  | -0.71940800 | 1.58213300  |
| N | -0.84645400 | 1.47712600  | 0.66826400  |
| C | 2.34148800  | -1.46988900 | 1.43169100  |
| C | 3.62222000  | -1.46294400 | 0.87023700  |
| C | 2.11394800  | -2.27440100 | 2.55179500  |
| C | 4.63058100  | -2.26520400 | 1.39551900  |
| H | 3.84238200  | -0.79905600 | 0.04120500  |
| C | 3.12003900  | -3.07639400 | 3.08162900  |
| H | 1.13387600  | -2.26021900 | 3.02592000  |
| C | 4.38269200  | -3.07963700 | 2.49704000  |
| H | 5.61897100  | -2.24396000 | 0.94673500  |

|   |             |             |             |
|---|-------------|-------------|-------------|
| H | 2.91789200  | -3.68963600 | 3.95445800  |
| H | 5.17268300  | -3.70205300 | 2.90554000  |
| S | -1.73440500 | 1.82997300  | -0.59153200 |
| O | -1.52054500 | 0.89269200  | -1.74144300 |
| O | -1.76617600 | 3.24362900  | -0.99058500 |
| C | -3.34688800 | 1.37066300  | 0.04283700  |
| C | -4.25209600 | 0.76376600  | -0.82069800 |
| C | -3.70180100 | 1.64293700  | 1.36241500  |
| C | -5.52119200 | 0.42172600  | -0.35707500 |
| H | -3.94993300 | 0.56007900  | -1.84394100 |
| C | -4.96971200 | 1.29554500  | 1.81108600  |
| H | -2.97096300 | 2.10009500  | 2.02142500  |
| C | -5.89799200 | 0.68322900  | 0.96073600  |
| H | -6.23141700 | -0.05027000 | -1.03178600 |
| H | -5.24868900 | 1.50140600  | 2.84207800  |
| C | -7.27427600 | 0.32931200  | 1.46409600  |
| H | -7.84777500 | 1.23222000  | 1.69900500  |
| H | -7.83638000 | -0.23943800 | 0.71891000  |
| H | -7.22077500 | -0.26858200 | 2.37959200  |
| N | -2.19914700 | -3.92663500 | -0.74620500 |
| N | -0.36747600 | -2.12112400 | -0.57921000 |
| C | -2.06501800 | -3.22302600 | -2.02254100 |
| H | -1.98969100 | -3.95447600 | -2.83190900 |
| H | -2.97204100 | -2.63311300 | -2.18438200 |
| C | -2.54338000 | -2.93894300 | 0.27853500  |
| H | -3.58195200 | -2.61945500 | 0.15028300  |
| H | -2.45850600 | -3.41904700 | 1.25836200  |
| C | -0.90719400 | -4.52110700 | -0.40126600 |
| H | -1.03834000 | -5.20966100 | 0.43818600  |
| H | -0.55991300 | -5.10479600 | -1.25904500 |
| C | 0.12550000  | -3.43154400 | -0.02524500 |
| H | 0.20714700  | -3.29738800 | 1.05494600  |
| H | 1.11826500  | -3.61297000 | -0.43688900 |
| C | -0.81305600 | -2.31618000 | -2.02130900 |
| H | 0.02680400  | -2.76805700 | -2.54617800 |
| H | -1.01437900 | -1.31311800 | -2.40996400 |
| C | -1.62385700 | -1.70724000 | 0.17188900  |
| H | -2.05748300 | -0.90198900 | -0.42196800 |
| H | -1.34998900 | -1.29425500 | 1.14032200  |
| C | 0.65226500  | -0.99645900 | -0.53082000 |
| H | 0.08384000  | -0.13405000 | -0.88847400 |
| C | 1.79596400  | -1.22820700 | -1.50852000 |
| O | 2.37407300  | -0.06232000 | -1.75365300 |
| O | 2.15565800  | -2.28861900 | -1.96966600 |
| C | 3.56977500  | -0.06286400 | -2.55711800 |

|   |            |             |             |
|---|------------|-------------|-------------|
| H | 4.17594700 | -0.93092100 | -2.28163100 |
| H | 3.27248000 | -0.17281800 | -3.60426900 |
| C | 4.26938100 | 1.25056500  | -2.28450600 |
| H | 5.17043200 | 1.32818800  | -2.89885700 |
| H | 3.60972900 | 2.09156300  | -2.51196900 |
| H | 4.54920800 | 1.31957300  | -1.22944900 |

**N-TS2-RR**

|                                          |                             |
|------------------------------------------|-----------------------------|
| Zero-point correction=                   | 0.633467 (Hartree/Particle) |
| Thermal correction to Energy=            | 0.669249                    |
| Thermal correction to Enthalpy=          | 0.670193                    |
| Thermal correction to Gibbs Free Energy= | 0.564565                    |

E(solv) = -2178.77309220 A.U.

Imaginary Frequency 186.25i

|   |             |             |             |
|---|-------------|-------------|-------------|
| C | 1.93883600  | 2.57741700  | 0.34424000  |
| C | 3.20642900  | 1.97741900  | 0.34949900  |
| C | 4.38102900  | 2.68245300  | 0.11084400  |
| C | 4.25096600  | 4.04036700  | -0.14387500 |
| C | 2.99479300  | 4.66834500  | -0.15191100 |
| C | 1.83273100  | 3.95318800  | 0.09156500  |
| C | 0.99800600  | 1.49876600  | 0.64483600  |
| C | 1.81637800  | 0.34462100  | 0.81976700  |
| H | 5.34348300  | 2.18330000  | 0.13303200  |
| H | 5.14228400  | 4.62947300  | -0.33818700 |
| H | 2.93365200  | 5.73290200  | -0.35098000 |
| H | 0.86802500  | 4.44618700  | 0.08250400  |
| O | 3.15678400  | 0.64836900  | 0.60985300  |
| C | 1.35642500  | -0.92674400 | 1.08750200  |
| H | 0.34570900  | -0.92382600 | 1.48756700  |
| N | -0.31680800 | 1.41192400  | 0.76540400  |
| C | 2.21186400  | -2.05949200 | 1.48496800  |
| C | 3.46862600  | -2.28248500 | 0.90580600  |
| C | 1.74488800  | -2.95656700 | 2.45304500  |
| C | 4.23364400  | -3.37525300 | 1.29725800  |
| H | 3.82164800  | -1.60566400 | 0.13587100  |
| C | 2.51590100  | -4.04512800 | 2.84775700  |
| H | 0.77471400  | -2.78452900 | 2.91469300  |
| C | 3.76405800  | -4.25818000 | 2.26852600  |
| H | 5.20441400  | -3.53996500 | 0.83947400  |
| H | 2.14334400  | -4.72469500 | 3.60832200  |
| H | 4.36758500  | -5.10839700 | 2.57101400  |
| S | -1.23515200 | 2.74031400  | 0.51375100  |
| O | -1.07808700 | 3.27968800  | -0.83846000 |
| O | -1.12998500 | 3.67665100  | 1.63370400  |
| C | -2.84938600 | 1.98318800  | 0.58334300  |

|   |             |             |             |
|---|-------------|-------------|-------------|
| C | -3.67856600 | 2.06084000  | -0.52760700 |
| C | -3.28410400 | 1.38753200  | 1.76555700  |
| C | -4.96354000 | 1.52444600  | -0.45297300 |
| H | -3.31084500 | 2.54711100  | -1.42591000 |
| C | -4.56352700 | 0.84937900  | 1.82051900  |
| H | -2.62492600 | 1.36279000  | 2.62834500  |
| C | -5.41933700 | 0.90707400  | 0.71266100  |
| H | -5.62302300 | 1.58790200  | -1.31517500 |
| H | -4.91482000 | 0.38738400  | 2.74029900  |
| C | -6.78994700 | 0.28370400  | 0.77309600  |
| H | -7.24081300 | 0.41023200  | 1.76132300  |
| H | -7.46076400 | 0.72534700  | 0.03171800  |
| H | -6.73522100 | -0.79277600 | 0.57133600  |
| N | -3.32416600 | -2.96950000 | -0.98100200 |
| N | -0.84601800 | -2.24230100 | -0.95359500 |
| C | -3.20248000 | -1.58945300 | -0.50093600 |
| H | -3.89732800 | -0.95283600 | -1.05480100 |
| H | -3.50821400 | -1.56276700 | 0.54980500  |
| C | -2.54848000 | -3.83635100 | -0.09921200 |
| H | -3.05480100 | -3.91063100 | 0.86727200  |
| H | -2.52125500 | -4.83863300 | -0.53831700 |
| C | -2.76218900 | -3.04722900 | -2.32837800 |
| H | -2.98736100 | -4.02884000 | -2.75604200 |
| H | -3.25654300 | -2.29128700 | -2.94495300 |
| C | -1.23195400 | -2.81340400 | -2.30112200 |
| H | -0.65945800 | -3.73891500 | -2.40880300 |
| H | -0.89519000 | -2.08859600 | -3.04239900 |
| C | -1.76086300 | -1.05995600 | -0.67018500 |
| H | -1.63891000 | -0.37609400 | -1.51025300 |
| H | -1.37012100 | -0.55241200 | 0.21325800  |
| C | -1.11670400 | -3.28383200 | 0.09573000  |
| H | -0.98261900 | -2.78459000 | 1.05780400  |
| H | -0.34691500 | -4.05337700 | 0.00036700  |
| C | 0.59464400  | -1.88623000 | -0.88638900 |
| H | 1.20658400  | -2.77854900 | -0.80685000 |
| C | 1.02981100  | -0.90256100 | -1.84429500 |
| O | 2.38009400  | -0.83077500 | -1.86041700 |
| O | 0.33087600  | -0.14936300 | -2.50959500 |
| C | 2.92944700  | 0.27962100  | -2.58016600 |
| H | 2.59429800  | 0.23523300  | -3.62078300 |
| H | 2.54489700  | 1.20997200  | -2.14796000 |
| C | 4.43489200  | 0.18111100  | -2.46219000 |
| H | 4.90776700  | 1.02679500  | -2.96922000 |
| H | 4.73231200  | 0.19717500  | -1.40995200 |

|                                          |                |             |                             |
|------------------------------------------|----------------|-------------|-----------------------------|
| H                                        | 4.79857900     | -0.74650800 | -2.91346700                 |
| <b>N-TS2-SR</b>                          |                |             |                             |
| Zero-point correction=                   |                |             | 0.633411 (Hartree/Particle) |
| Thermal correction to Energy=            |                |             | 0.669285                    |
| Thermal correction to Enthalpy=          |                |             | 0.670230                    |
| Thermal correction to Gibbs Free Energy= |                |             | 0.563354                    |
| E(solv) =                                | -2178.77166417 | A.U.        |                             |
| Imaginary Frequency                      | 181.74i        |             |                             |
| C                                        | 1.47988700     | 2.99485600  | 0.22891000                  |
| C                                        | 2.81403800     | 2.57817200  | 0.35512100                  |
| C                                        | 3.89497900     | 3.38788400  | 0.02620600                  |
| C                                        | 3.59904000     | 4.65282900  | -0.46131300                 |
| C                                        | 2.27233400     | 5.09472400  | -0.60247700                 |
| C                                        | 1.20437400     | 4.28168100  | -0.25860400                 |
| C                                        | 0.68024900     | 1.86460800  | 0.68546900                  |
| C                                        | 1.62879100     | 0.86693900  | 1.03951000                  |
| H                                        | 4.91280000     | 3.03436400  | 0.14725800                  |
| H                                        | 4.41267600     | 5.31680800  | -0.73708900                 |
| H                                        | 2.08265700     | 6.09314600  | -0.98179100                 |
| H                                        | 0.18237000     | 4.63147100  | -0.34798900                 |
| O                                        | 2.92386200     | 1.31683700  | 0.83676500                  |
| C                                        | 1.29200200     | -0.44903700 | 1.28984200                  |
| H                                        | 0.26422300     | -0.55766000 | 1.62328000                  |
| N                                        | -0.61905000    | 1.58420000  | 0.74097100                  |
| C                                        | 2.20908600     | -1.52828000 | 1.68101700                  |
| C                                        | 3.56379300     | -1.54223700 | 1.32004400                  |
| C                                        | 1.71154500     | -2.59068100 | 2.44928900                  |
| C                                        | 4.38228100     | -2.59950200 | 1.70200900                  |
| H                                        | 3.96684400     | -0.71742600 | 0.74640200                  |
| C                                        | 2.53189800     | -3.64263100 | 2.83636200                  |
| H                                        | 0.67043800     | -2.57499400 | 2.76384000                  |
| C                                        | 3.87210000     | -3.65345800 | 2.45594800                  |
| H                                        | 5.42855500     | -2.59702900 | 1.41129000                  |
| H                                        | 2.12832900     | -4.45089400 | 3.43841200                  |
| H                                        | 4.51625200     | -4.47553800 | 2.75183600                  |
| S                                        | -1.69407400    | 2.56966900  | 0.01806200                  |
| O                                        | -1.54769300    | 2.52795600  | -1.44334400                 |
| O                                        | -1.77690600    | 3.88929200  | 0.64741700                  |
| C                                        | -3.19370400    | 1.67523300  | 0.39583000                  |
| C                                        | -4.13485700    | 1.51488700  | -0.61448400                 |
| C                                        | -3.42494000    | 1.17415000  | 1.67441200                  |
| C                                        | -5.31969900    | 0.83540100  | -0.33978900                 |
| H                                        | -3.92508900    | 1.91522500  | -1.60172500                 |
| C                                        | -4.60566100    | 0.48570800  | 1.92895200                  |
| H                                        | -2.67529700    | 1.31125200  | 2.44765500                  |

|   |             |             |             |
|---|-------------|-------------|-------------|
| C | -5.56710400 | 0.30333500  | 0.92781800  |
| H | -6.06259000 | 0.71233900  | -1.12414600 |
| H | -4.79083900 | 0.08691600  | 2.92324100  |
| C | -6.82585500 | -0.47840700 | 1.20373700  |
| H | -7.13924600 | -0.37162700 | 2.24556200  |
| H | -7.64702800 | -0.14658000 | 0.56317300  |
| H | -6.66974900 | -1.54673400 | 1.01361900  |
| N | -2.79611000 | -3.32628900 | -1.24393400 |
| N | -0.66043900 | -1.90316500 | -1.01779000 |
| C | -2.24807900 | -3.03377900 | -2.56829500 |
| H | -2.15838900 | -3.96805000 | -3.12976900 |
| H | -2.96028100 | -2.39329500 | -3.09661000 |
| C | -3.09540600 | -2.05873400 | -0.57275500 |
| H | -3.95060600 | -1.58233400 | -1.06036000 |
| H | -3.38760000 | -2.27445000 | 0.46004000  |
| C | -1.78064000 | -4.04410200 | -0.47177500 |
| H | -2.23268000 | -4.41972900 | 0.45066100  |
| H | -1.45642900 | -4.90851600 | -1.05872600 |
| C | -0.58234600 | -3.12463800 | -0.13920700 |
| H | -0.62023400 | -2.74732300 | 0.88417100  |
| H | 0.39243300  | -3.58042100 | -0.31648900 |
| C | -0.86588600 | -2.34494800 | -2.45248500 |
| H | -0.02687400 | -3.00167700 | -2.68354700 |
| H | -0.78749200 | -1.43956200 | -3.05781200 |
| C | -1.87610100 | -1.11174300 | -0.60884200 |
| H | -1.97535300 | -0.30270100 | -1.33961200 |
| H | -1.64861300 | -0.64733500 | 0.35202400  |
| C | 0.53653900  | -1.04238200 | -0.84581200 |
| H | 0.29226400  | -0.01089600 | -1.07184900 |
| C | 1.75866500  | -1.57368200 | -1.37945900 |
| O | 2.69241300  | -0.59699400 | -1.47778300 |
| O | 2.00537500  | -2.74432700 | -1.65903000 |
| C | 3.97373000  | -1.00569800 | -1.95880000 |
| H | 4.33720800  | -1.84522100 | -1.35763200 |
| H | 3.87269200  | -1.35909800 | -2.99058700 |
| C | 4.88047500  | 0.20413500  | -1.86413400 |
| H | 5.87311100  | -0.03334600 | -2.25667800 |
| H | 4.46477000  | 1.03851300  | -2.43535400 |
| H | 4.98157100  | 0.52873500  | -0.82407900 |

### N-TS3-RR

|                                          |                             |
|------------------------------------------|-----------------------------|
| Zero-point correction=                   | 0.634369 (Hartree/Particle) |
| Thermal correction to Energy=            | 0.669820                    |
| Thermal correction to Enthalpy=          | 0.670764                    |
| Thermal correction to Gibbs Free Energy= | 0.566223                    |



E(solv) = -2178.76856296 A.U.

Imaginary Frequency 462.32i

|   |             |             |             |
|---|-------------|-------------|-------------|
| C | 2.97622500  | 1.39125700  | 0.54328500  |
| C | 2.87067100  | 1.36167200  | 1.94699300  |
| C | 3.93028400  | 1.64202000  | 2.79673300  |
| C | 5.14123500  | 1.96354800  | 2.19494100  |
| C | 5.27484600  | 1.99928000  | 0.79758900  |
| C | 4.20598900  | 1.71518400  | -0.04234400 |
| C | 1.64718100  | 1.03589900  | 0.07552500  |
| C | 0.91296300  | 0.84037400  | 1.18837300  |
| H | 3.80673100  | 1.60784300  | 3.87353400  |
| H | 5.99994800  | 2.19075500  | 2.81895600  |
| H | 6.23731500  | 2.25463100  | 0.36525100  |
| H | 4.30128200  | 1.73059000  | -1.12249900 |
| O | 1.60289200  | 1.03445900  | 2.34864200  |
| C | -0.52297500 | 0.42415900  | 1.16020000  |
| H | -1.10478300 | 1.13355000  | 1.76735000  |
| N | 0.95253600  | 0.99149100  | -1.12500300 |
| C | -0.63521700 | -0.96446800 | 1.77583200  |
| C | -0.95730300 | -1.08438100 | 3.12813300  |
| C | -0.35931800 | -2.11572800 | 1.03853000  |
| C | -1.04477800 | -2.33721900 | 3.72785400  |
| H | -1.14638900 | -0.18667200 | 3.71324400  |
| C | -0.46260900 | -3.37065300 | 1.63328000  |
| H | -0.06440200 | -2.04244300 | -0.00469200 |
| C | -0.81084600 | -3.48645700 | 2.97686300  |
| H | -1.30022200 | -2.41510300 | 4.78031400  |
| H | -0.26416200 | -4.25771400 | 1.03849400  |
| H | -0.89034900 | -4.46567300 | 3.43880400  |
| S | 1.54880700  | 0.18480300  | -2.39949400 |
| O | 2.92361900  | 0.60797800  | -2.66352400 |
| O | 0.53834000  | 0.25398200  | -3.44736900 |
| C | 1.64271800  | -1.53355200 | -1.90892100 |
| C | 2.59745900  | -1.93776800 | -0.97596100 |
| C | 0.71657100  | -2.43728400 | -2.41950900 |
| C | 2.60187500  | -3.25681900 | -0.54100100 |
| H | 3.32906700  | -1.22542400 | -0.60425600 |
| C | 0.74280200  | -3.76076100 | -1.98215300 |
| H | -0.00177700 | -2.09326200 | -3.15774200 |
| C | 1.68005700  | -4.18606600 | -1.03849300 |
| H | 3.33553200  | -3.57752700 | 0.19445500  |
| H | 0.02860100  | -4.47515600 | -2.38469400 |
| C | 1.72503100  | -5.62077200 | -0.57715000 |
| H | 2.53142900  | -6.16571500 | -1.07995300 |
| H | 1.91057200  | -5.68336400 | 0.49970600  |

|   |             |             |             |
|---|-------------|-------------|-------------|
| H | 0.78786700  | -6.14037900 | -0.79606500 |
| C | -1.02635100 | 0.56238100  | -0.28387200 |
| C | -1.13053900 | 1.91577200  | -0.93549400 |
| O | -1.58684400 | 2.11665900  | -2.03519600 |
| O | -0.77013800 | 2.87826300  | -0.07849900 |
| C | 0.34728900  | 4.93017400  | 0.31135000  |
| C | -0.50132600 | 4.15820300  | -0.67478000 |
| H | -1.06949500 | -0.28590000 | -0.95599300 |
| H | 0.58194600  | 5.91957400  | -0.09035500 |
| H | -0.17738600 | 5.05637900  | 1.26233400  |
| H | 1.28268100  | 4.39513400  | 0.49684400  |
| H | 0.01842000  | 3.98711900  | -1.62115100 |
| H | -1.45336100 | 4.65573200  | -0.88918500 |
| N | -3.05231900 | 0.38600100  | -0.03091100 |
| C | -3.50737000 | -0.58748000 | 0.99529500  |
| C | -5.08956900 | 0.02439600  | -1.38611400 |
| C | -5.20555200 | 1.51007800  | 0.46921600  |
| C | -3.67683200 | 1.70163300  | 0.27506800  |
| C | -3.54258000 | -0.09131600 | -1.35354000 |
| C | -5.03652400 | -0.82061200 | 0.83063200  |
| N | -5.62379400 | 0.20152800  | -0.03271900 |
| H | -2.94456900 | -1.51465600 | 0.87424500  |
| H | -3.26333300 | -0.17336700 | 1.97751100  |
| H | -5.53378900 | -0.87214000 | -1.82879200 |
| H | -5.40174000 | 0.88258600  | -1.98907400 |
| H | -5.75486300 | 2.29099600  | -0.06478800 |
| H | -5.48324200 | 1.57130900  | 1.52641100  |
| H | -3.46955500 | 2.36532600  | -0.56620000 |
| H | -3.19009100 | 2.11187500  | 1.16594400  |
| H | -3.05866900 | 0.49913400  | -2.13366900 |
| H | -3.21295700 | -1.13173600 | -1.45038000 |
| H | -5.23254800 | -1.79990800 | 0.38263000  |
| H | -5.53358800 | -0.79527700 | 1.80518100  |

### N-TS3-SR

|                                          |                |                             |             |
|------------------------------------------|----------------|-----------------------------|-------------|
| Zero-point correction=                   |                | 0.634229 (Hartree/Particle) |             |
| Thermal correction to Energy=            |                | 0.669798                    |             |
| Thermal correction to Enthalpy=          |                | 0.670743                    |             |
| Thermal correction to Gibbs Free Energy= |                | 0.564393                    |             |
| E(solv) =                                | -2178.76091300 | A.U.                        |             |
| Imaginary Frequency                      | 473.33i        |                             |             |
| C                                        | 3.41716100     | -0.59437500                 | -0.65002200 |
| C                                        | 3.50152000     | -0.01838100                 | -1.93378400 |
| C                                        | 4.60701200     | -0.14285100                 | -2.76321500 |
| C                                        | 5.68019400     | -0.86895100                 | -2.26515700 |

|   |             |             |             |
|---|-------------|-------------|-------------|
| C | 5.63321700  | -1.44419800 | -0.98511000 |
| C | 4.51709900  | -1.31986500 | -0.16981100 |
| C | 2.09312300  | -0.20916600 | -0.17008200 |
| C | 1.54972900  | 0.51083700  | -1.17575200 |
| H | 4.61896900  | 0.31738300  | -3.74495900 |
| H | 6.57000000  | -0.99004100 | -2.87497900 |
| H | 6.49188200  | -2.00156600 | -0.62430900 |
| H | 4.47746900  | -1.77084300 | 0.81316200  |
| O | 2.36788300  | 0.67431000  | -2.25475900 |
| C | 0.25414900  | 1.23085800  | -1.00652500 |
| H | -0.26953700 | 1.19359300  | -1.96406000 |
| N | 1.34379900  | -0.22972600 | 1.00680300  |
| C | 0.44856900  | 2.70463300  | -0.65649800 |
| C | 1.44981200  | 3.10085500  | 0.23444200  |
| C | -0.34145800 | 3.67945000  | -1.26103400 |
| C | 1.63384100  | 4.44580900  | 0.52689600  |
| H | 2.06414100  | 2.34265800  | 0.71268900  |
| C | -0.16300700 | 5.03094400  | -0.96483800 |
| H | -1.09599500 | 3.39097200  | -1.99028300 |
| C | 0.82496800  | 5.41598700  | -0.06674600 |
| H | 2.41215300  | 4.74139200  | 1.22413700  |
| H | -0.78569200 | 5.77769000  | -1.44803400 |
| H | 0.97458900  | 6.46648100  | 0.16275300  |
| S | 1.32990300  | -1.56520100 | 1.93601200  |
| O | 0.70571600  | -1.20051900 | 3.20241200  |
| O | 2.64218500  | -2.21089700 | 1.93620600  |
| C | 0.21646300  | -2.70799200 | 1.12154800  |
| C | -1.01269700 | -3.00962600 | 1.69977100  |
| C | 0.57043200  | -3.23242400 | -0.12159600 |
| C | -1.89275600 | -3.84994900 | 1.02365700  |
| H | -1.26106500 | -2.57228200 | 2.66084600  |
| C | -0.33023600 | -4.05398800 | -0.79349500 |
| H | 1.54463700  | -3.00702300 | -0.54826000 |
| C | -1.56931100 | -4.37767100 | -0.22994000 |
| H | -2.85066400 | -4.09894900 | 1.47506800  |
| H | -0.06119000 | -4.46515000 | -1.76323000 |
| C | -2.52478800 | -5.30117700 | -0.94287300 |
| H | -2.32908200 | -5.32475700 | -2.01823600 |
| H | -2.42835800 | -6.32582000 | -0.56749500 |
| H | -3.56389500 | -4.99468500 | -0.78873800 |
| N | -4.86420800 | 0.28563000  | -1.68513800 |
| N | -2.44742800 | 0.43217400  | -0.80757800 |
| C | -4.55746300 | -0.86016000 | -0.82489600 |
| H | -5.16204200 | -0.77310800 | 0.08311700  |
| H | -4.85681200 | -1.78017300 | -1.33638400 |

|   |             |             |             |
|---|-------------|-------------|-------------|
| C | -3.91646700 | 0.28241800  | -2.79631900 |
| H | -3.96462300 | -0.69585500 | -3.28419600 |
| H | -4.21802100 | 1.03619500  | -3.52958900 |
| C | -4.66903300 | 1.51574400  | -0.91402300 |
| H | -4.75856300 | 2.36336300  | -1.60098900 |
| H | -5.47028400 | 1.60189200  | -0.17454100 |
| C | -3.28128200 | 1.50637600  | -0.21146700 |
| H | -2.74377800 | 2.45406900  | -0.31968000 |
| H | -3.37718600 | 1.28548500  | 0.85405900  |
| C | -3.04513600 | -0.89277900 | -0.48042500 |
| H | -2.86141200 | -1.09970300 | 0.57316600  |
| H | -2.50450600 | -1.64292900 | -1.06959100 |
| C | -2.47762200 | 0.57663100  | -2.28087200 |
| H | -1.74215700 | -0.11101500 | -2.71168900 |
| H | -2.18192000 | 1.59904900  | -2.52825300 |
| C | -0.53140300 | 0.35702700  | -0.01816900 |
| H | -0.57320700 | -0.69944000 | -0.25685300 |
| C | -0.99757700 | 0.69455900  | 1.37570800  |
| O | -0.61511400 | 1.88500200  | 1.80150300  |
| O | -1.68626100 | -0.06583500 | 2.01913800  |
| C | -0.81156300 | 2.11758300  | 3.21100200  |
| H | -1.88685900 | 2.18024300  | 3.40770200  |
| H | -0.40959700 | 1.25455000  | 3.74869000  |
| C | -0.09070900 | 3.40436600  | 3.54439500  |
| H | -0.24636900 | 3.65380900  | 4.59743900  |
| H | 0.98153400  | 3.29391600  | 3.36574000  |
| H | -0.46013700 | 4.22762400  | 2.92638800  |

### S-INT3-RR-1

|                                          |                             |
|------------------------------------------|-----------------------------|
| Zero-point correction=                   | 0.524884 (Hartree/Particle) |
| Thermal correction to Energy=            | 0.558867                    |
| Thermal correction to Enthalpy=          | 0.559811                    |
| Thermal correction to Gibbs Free Energy= | 0.457551                    |
| E(solv) = -2311.48719920                 | A.U.                        |

|   |            |             |             |
|---|------------|-------------|-------------|
| C | 2.85298700 | -0.86882200 | 0.44685800  |
| C | 2.64414400 | -1.42295800 | 1.71595400  |
| C | 3.55107100 | -2.26622200 | 2.34458900  |
| C | 4.72308600 | -2.54014900 | 1.65123400  |
| C | 4.96702500 | -1.98513500 | 0.38383100  |
| C | 4.04483000 | -1.15068300 | -0.23209800 |
| C | 1.67427200 | -0.04607400 | 0.18300000  |
| C | 0.89585700 | -0.18906300 | 1.29183800  |
| H | 3.34575800 | -2.67829500 | 3.32653400  |
| H | 5.46437100 | -3.19486100 | 2.09942100  |
| H | 5.89672000 | -2.21888400 | -0.12553600 |

|   |             |             |             |
|---|-------------|-------------|-------------|
| H | 4.21335800  | -0.73556600 | -1.21871800 |
| O | 1.45770000  | -1.00886400 | 2.24206100  |
| C | -0.41981500 | 0.41300800  | 1.67032500  |
| H | -0.27409700 | 1.08054000  | 2.53451400  |
| N | 1.38983600  | 0.86059300  | -0.82930000 |
| C | -1.43120800 | -0.66509500 | 2.03988800  |
| C | -2.02123500 | -0.70861900 | 3.30033600  |
| C | -1.80172400 | -1.60608700 | 1.07618400  |
| C | -2.97823300 | -1.67871200 | 3.59571500  |
| H | -1.72493800 | 0.01387500  | 4.05787800  |
| C | -2.75990900 | -2.56997500 | 1.36716700  |
| H | -1.31226100 | -1.60052900 | 0.10381600  |
| C | -3.35311900 | -2.60662900 | 2.62888100  |
| H | -3.42765100 | -1.71023200 | 4.58366500  |
| H | -3.03124500 | -3.30027500 | 0.60936400  |
| H | -4.09783300 | -3.36227500 | 2.85946700  |
| S | 1.36356000  | 0.36546500  | -2.34943600 |
| O | 2.47243200  | -0.53045400 | -2.69482600 |
| O | 1.10728600  | 1.53483800  | -3.18418100 |
| C | -0.10383100 | -0.67091800 | -2.46927000 |
| C | -0.01058800 | -2.03380800 | -2.20702200 |
| C | -1.34253700 | -0.08667200 | -2.73860300 |
| C | -1.16687500 | -2.81509900 | -2.20546700 |
| H | 0.96651000  | -2.47206900 | -2.02500000 |
| C | -2.48825500 | -0.87744700 | -2.72714900 |
| H | -1.37658200 | 0.97549100  | -2.97395400 |
| C | -2.41861400 | -2.25030800 | -2.45477300 |
| H | -1.09352900 | -3.88149500 | -2.00548800 |
| H | -3.45500500 | -0.43552900 | -2.96651500 |
| C | -3.67222600 | -3.08874700 | -2.44744200 |
| H | -4.17500300 | -3.05558600 | -3.41956600 |
| H | -3.44800700 | -4.13451800 | -2.22125100 |
| H | -4.38527900 | -2.72614400 | -1.69854800 |
| C | -0.96002600 | 1.24051300  | 0.49278300  |
| C | -0.14048600 | 2.40961900  | -0.05297500 |
| O | -0.51996400 | 3.03322000  | -1.02374800 |
| O | 0.75481000  | 2.83765200  | 0.83730900  |
| C | 3.09993500  | 3.24592300  | 0.95230700  |
| C | 1.80854300  | 3.66128200  | 0.28384100  |
| H | -1.20465600 | 0.59415200  | -0.35505000 |
| H | 3.91970500  | 3.87725900  | 0.59760900  |
| H | 3.03024100  | 3.34459300  | 2.03939800  |
| H | 3.32275300  | 2.20569000  | 0.70073000  |
| H | 1.83649700  | 3.48610000  | -0.79380500 |
| H | 1.55255800  | 4.70834300  | 0.47778800  |

|   |             |            |             |
|---|-------------|------------|-------------|
| S | -2.63322900 | 1.90774300 | 0.97742000  |
| C | -2.27807000 | 3.61542500 | 1.46505600  |
| H | -1.54719100 | 3.57425400 | 2.27531200  |
| H | -1.86641800 | 4.15783300 | 0.61181500  |
| H | -3.21153800 | 4.05509700 | 1.81918900  |
| C | -3.39696700 | 2.14203500 | -0.64351700 |
| H | -3.57165200 | 1.14174900 | -1.04689700 |
| H | -4.34492900 | 2.66200500 | -0.49553800 |
| H | -2.70112100 | 2.69917500 | -1.27500500 |

### S-INT3-RR

|                                          |                             |
|------------------------------------------|-----------------------------|
| Zero-point correction=                   | 0.525575 (Hartree/Particle) |
| Thermal correction to Energy=            | 0.559363                    |
| Thermal correction to Enthalpy=          | 0.560307                    |
| Thermal correction to Gibbs Free Energy= | 0.459863                    |

E(solv) = -2311.48275905 A.U.

|   |             |             |             |
|---|-------------|-------------|-------------|
| C | -1.41568100 | 2.43278800  | -0.63928500 |
| C | -2.76656600 | 2.10422800  | -0.43955300 |
| C | -3.77103900 | 3.05020600  | -0.27064300 |
| C | -3.38109300 | 4.38172300  | -0.29546600 |
| C | -2.03734500 | 4.74202700  | -0.49569800 |
| C | -1.04748000 | 3.78641000  | -0.67329800 |
| C | -0.72436800 | 1.15191600  | -0.74971000 |
| C | -1.70728600 | 0.21651700  | -0.62677300 |
| H | -4.80165900 | 2.74704000  | -0.12170800 |
| H | -4.12858800 | 5.15746300  | -0.16027900 |
| H | -1.76891200 | 5.79357000  | -0.51546200 |
| H | -0.01541100 | 4.07649700  | -0.83377000 |
| O | -2.95699500 | 0.76050300  | -0.42384600 |
| C | -1.48651600 | -1.25046900 | -0.54861600 |
| H | -0.83837700 | -1.49763700 | -1.40312600 |
| N | 0.59559200  | 0.75683500  | -0.84202700 |
| C | -2.74600400 | -2.08681700 | -0.64414200 |
| C | -3.75426000 | -1.93721500 | 0.31466000  |
| C | -2.90664900 | -3.03037600 | -1.65674000 |
| C | -4.90101600 | -2.71897200 | 0.25671600  |
| H | -3.63987400 | -1.18493300 | 1.09173400  |
| C | -4.05722900 | -3.81620700 | -1.71539700 |
| H | -2.13060600 | -3.14780000 | -2.40943900 |
| C | -5.05449300 | -3.66285800 | -0.75850600 |
| H | -5.68073000 | -2.58769600 | 1.00056700  |
| H | -4.17173500 | -4.54670800 | -2.51025600 |
| H | -5.95137100 | -4.27283300 | -0.80313500 |
| S | 1.72337000  | 1.89294300  | -0.73100200 |
| O | 1.63454700  | 2.67222700  | 0.52029800  |

|   |             |             |             |
|---|-------------|-------------|-------------|
| O | 1.89927600  | 2.68256400  | -1.95604600 |
| C | 3.16203400  | 0.84665900  | -0.57054600 |
| C | 3.68658500  | 0.59290800  | 0.69017700  |
| C | 3.71674400  | 0.26625000  | -1.70758200 |
| C | 4.77128500  | -0.27337300 | 0.81261300  |
| H | 3.23202900  | 1.06389200  | 1.55531000  |
| C | 4.79311900  | -0.60424500 | -1.57013100 |
| H | 3.30132000  | 0.50577700  | -2.68252100 |
| C | 5.33511200  | -0.88494300 | -0.31037800 |
| H | 5.19127300  | -0.47390600 | 1.79559600  |
| H | 5.23317900  | -1.06274000 | -2.45291500 |
| C | 6.53133200  | -1.79334400 | -0.17737200 |
| H | 7.46058100  | -1.23890600 | -0.34936900 |
| H | 6.59101400  | -2.23114000 | 0.82295300  |
| H | 6.49790300  | -2.60693400 | -0.90807000 |
| C | -0.68366400 | -1.68956900 | 0.75373800  |
| H | -1.38881800 | -2.19937200 | 1.42100600  |
| C | 0.03888400  | -0.64408200 | 1.61174300  |
| O | -0.83226600 | 0.24665100  | 2.02946000  |
| O | 1.19582000  | -0.73170500 | 1.96154900  |
| C | -0.29172600 | 1.38163600  | 2.76192000  |
| H | 0.16372200  | 0.99625200  | 3.67941700  |
| H | 0.47506000  | 1.84333700  | 2.13305600  |
| C | -1.44616900 | 2.31757100  | 3.03527800  |
| H | -1.08460900 | 3.17326600  | 3.61185200  |
| H | -1.86742300 | 2.68997700  | 2.09765600  |
| H | -2.23304200 | 1.81866000  | 3.60845500  |
| S | 0.44897600  | -3.01876500 | 0.21086100  |
| C | 1.84293900  | -2.13044500 | -0.53536100 |
| H | 2.54765500  | -1.83659300 | 0.24417200  |
| H | 2.28693300  | -2.79704800 | -1.27474800 |
| H | 1.42503900  | -1.21738700 | -0.98847800 |
| C | 1.14128200  | -3.70539600 | 1.73124200  |
| H | 1.87638400  | -4.45547900 | 1.43337800  |
| H | 1.59662300  | -2.90202400 | 2.30931600  |
| H | 0.32833600  | -4.18838800 | 2.27658000  |

### S-INT3-SR-1

|                                          |                |            |                             |
|------------------------------------------|----------------|------------|-----------------------------|
| Zero-point correction=                   |                |            | 0.525360 (Hartree/Particle) |
| Thermal correction to Energy=            |                |            | 0.559175                    |
| Thermal correction to Enthalpy=          |                |            | 0.560119                    |
| Thermal correction to Gibbs Free Energy= |                |            | 0.459198                    |
| E(solv) =                                | -2311.48284231 | A.U.       |                             |
| C                                        | 2.90765800     | 0.80626800 | -0.57392700                 |
| C                                        | 2.51324900     | 1.83338900 | -1.43455700                 |

|   |             |             |             |
|---|-------------|-------------|-------------|
| C | 3.40595400  | 2.62941600  | -2.14119400 |
| C | 4.75485000  | 2.35880700  | -1.95013100 |
| C | 5.18034500  | 1.33471800  | -1.08595200 |
| C | 4.27069000  | 0.54975800  | -0.39188700 |
| C | 1.67707800  | 0.24550800  | -0.02011300 |
| C | 0.67953000  | 0.98102800  | -0.59923200 |
| H | 3.05748700  | 3.41695900  | -2.80022300 |
| H | 5.49488400  | 2.94985900  | -2.48102200 |
| H | 6.24374400  | 1.15260100  | -0.96670400 |
| H | 4.58657600  | -0.26245300 | 0.25274100  |
| O | 1.15581200  | 1.94467500  | -1.46264800 |
| C | -0.82276800 | 0.89953500  | -0.58838800 |
| H | -1.09804100 | 0.49500900  | -1.57617100 |
| N | 1.52769100  | -0.70088800 | 0.98582400  |
| C | -1.51664000 | 2.25558000  | -0.49424200 |
| C | -1.42571800 | 3.08443400  | 0.62920400  |
| C | -2.26604900 | 2.69983000  | -1.58789500 |
| C | -2.12330700 | 4.28821700  | 0.67415500  |
| H | -0.80036600 | 2.78775900  | 1.46167000  |
| C | -2.96262700 | 3.90616800  | -1.54635100 |
| H | -2.28301300 | 2.10463900  | -2.49912800 |
| C | -2.90553700 | 4.69793600  | -0.40420500 |
| H | -2.04542900 | 4.91670300  | 1.55607800  |
| H | -3.53565100 | 4.22941700  | -2.40989000 |
| H | -3.44612500 | 5.63820000  | -0.36241100 |
| S | 2.03931400  | -2.18348600 | 0.71753700  |
| O | 2.03907000  | -2.90846500 | 1.98693200  |
| O | 3.21184800  | -2.28089100 | -0.15952100 |
| C | 0.67863700  | -2.88152600 | -0.23651700 |
| C | -0.37069700 | -3.51214500 | 0.43134400  |
| C | 0.56783100  | -2.57569900 | -1.59312400 |
| C | -1.53338200 | -3.83623900 | -0.26383400 |
| H | -0.26392100 | -3.72124400 | 1.49167900  |
| C | -0.60397000 | -2.89781000 | -2.27686200 |
| H | 1.40014200  | -2.09101700 | -2.09589100 |
| C | -1.66780400 | -3.53369900 | -1.62487700 |
| H | -2.34900400 | -4.33662700 | 0.25404000  |
| H | -0.68851300 | -2.67036000 | -3.33780300 |
| C | -2.91521100 | -3.93021300 | -2.37686600 |
| H | -3.04915800 | -3.33043500 | -3.28276600 |
| H | -2.86420300 | -4.97931200 | -2.68762300 |
| H | -3.81018200 | -3.82303200 | -1.75419800 |
| C | -1.25432400 | -0.18311100 | 0.41207300  |
| H | -0.76046600 | -1.11365000 | 0.11277900  |
| C | -0.95437300 | -0.10541300 | 1.91781100  |



|   |             |             |             |
|---|-------------|-------------|-------------|
| O | -0.18857400 | 0.89727300  | 2.27868000  |
| O | -1.44178800 | -0.92953000 | 2.65846700  |
| C | 0.57884700  | 0.68867800  | 3.49393100  |
| H | -0.07809900 | 0.87894500  | 4.34793300  |
| H | 0.90116600  | -0.35491800 | 3.49195000  |
| C | 1.75579200  | 1.63278700  | 3.42299700  |
| H | 2.36276900  | 1.52800100  | 4.32635300  |
| H | 2.36865400  | 1.37860100  | 2.55467400  |
| H | 1.42762300  | 2.67369000  | 3.34527200  |
| S | -3.02294900 | -0.71948200 | 0.37616800  |
| C | -3.50570800 | -0.56463800 | -1.35513600 |
| H | -2.79409800 | -1.15820900 | -1.93442100 |
| H | -4.50380300 | -0.99769000 | -1.44538900 |
| H | -3.50204200 | 0.48024400  | -1.66444800 |
| C | -3.93964900 | 0.64746700  | 1.13173600  |
| H | -3.77298900 | 1.57970100  | 0.59073000  |
| H | -4.99353800 | 0.36294700  | 1.12666700  |
| H | -3.58721300 | 0.72067600  | 2.16240400  |

### S-INT3-SR

|                                          |                             |
|------------------------------------------|-----------------------------|
| Zero-point correction=                   | 0.525797 (Hartree/Particle) |
| Thermal correction to Energy=            | 0.559138                    |
| Thermal correction to Enthalpy=          | 0.560082                    |
| Thermal correction to Gibbs Free Energy= | 0.461941                    |
| E(solv) = -2311.48055671                 | A.U.                        |

|   |             |            |             |
|---|-------------|------------|-------------|
| C | 1.37219400  | 2.92294800 | -0.09688200 |
| C | 0.39523900  | 3.47837600 | 0.74501700  |
| C | 0.63113400  | 4.54799300 | 1.59790100  |
| C | 1.91609500  | 5.07361200 | 1.59333700  |
| C | 2.91474600  | 4.54193400 | 0.76096700  |
| C | 2.66253400  | 3.47274000 | -0.08727700 |
| C | 0.69336600  | 1.83982600 | -0.80305300 |
| C | -0.58581200 | 1.85579800 | -0.31818500 |
| H | -0.15802300 | 4.94298100 | 2.22825500  |
| H | 2.15100500  | 5.91119800 | 2.24297900  |
| H | 3.90766000  | 4.98047600 | 0.78067500  |
| H | 3.43047200  | 3.05845300 | -0.73000500 |
| O | -0.80147400 | 2.84109000 | 0.60876600  |
| C | -1.67110800 | 0.93332300 | -0.78021800 |
| H | -1.74061200 | 1.08402200 | -1.86768100 |
| N | 1.03224000  | 0.93463400 | -1.80495400 |
| C | -3.07112500 | 1.05227900 | -0.21697300 |
| C | -3.34120500 | 1.39403500 | 1.11139100  |
| C | -4.14239700 | 0.74796800 | -1.06585500 |
| C | -4.65452300 | 1.41535800 | 1.57337500  |

|   |             |             |             |
|---|-------------|-------------|-------------|
| H | -2.52153000 | 1.64200700  | 1.77357600  |
| C | -5.45460800 | 0.75562800  | -0.59865100 |
| H | -3.94614700 | 0.52791200  | -2.11486900 |
| C | -5.71216000 | 1.08975400  | 0.72768500  |
| H | -4.85169100 | 1.68885400  | 2.60547500  |
| H | -6.27212100 | 0.52386200  | -1.27480200 |
| H | -6.73295800 | 1.10908300  | 1.09689000  |
| S | 2.44749500  | 0.21029700  | -1.86485200 |
| O | 3.61050500  | 1.09366900  | -1.75897900 |
| O | 2.38588600  | -0.72546100 | -3.00029400 |
| C | 2.52834600  | -0.87205400 | -0.41822900 |
| C | 2.37467800  | -0.35996300 | 0.87247100  |
| C | 2.74835200  | -2.23346500 | -0.60475800 |
| C | 2.43022700  | -1.22075000 | 1.96333000  |
| H | 2.22549500  | 0.70450500  | 1.02897100  |
| C | 2.81716200  | -3.08284000 | 0.49821400  |
| H | 2.88331600  | -2.60676800 | -1.61547100 |
| C | 2.66323800  | -2.59079600 | 1.79564200  |
| H | 2.30662200  | -0.81746900 | 2.96616800  |
| H | 3.01467300  | -4.14283200 | 0.34971400  |
| C | 2.78029300  | -3.50062200 | 2.99274200  |
| H | 3.72182000  | -3.32302900 | 3.52353900  |
| H | 1.97046100  | -3.33122500 | 3.71157400  |
| H | 2.75972700  | -4.55364800 | 2.69760000  |
| C | -1.06806500 | -0.49193900 | -0.63649100 |
| H | -0.02782500 | -0.35066300 | -1.01564900 |
| C | -1.01168300 | -1.06080900 | 0.76122000  |
| O | -0.79872400 | -2.38880900 | 0.76410200  |
| O | -1.09290800 | -0.39556800 | 1.75780700  |
| C | -0.69816300 | -2.99058900 | 2.07098700  |
| H | 0.07662100  | -2.46074000 | 2.62879000  |
| H | -1.65156300 | -2.84862400 | 2.58930700  |
| C | -0.36268000 | -4.44972700 | 1.86224100  |
| H | -0.23751700 | -4.94527600 | 2.82882400  |
| H | -1.15804200 | -4.96470000 | 1.31455000  |
| H | 0.57097300  | -4.54084700 | 1.29999900  |
| S | -1.68780500 | -1.57475000 | -1.96760700 |
| C | -0.25464600 | -2.62534200 | -2.29978600 |
| H | 0.06293200  | -3.10140200 | -1.37029900 |
| H | -0.54961000 | -3.35555200 | -3.05612100 |
| H | 0.53249500  | -1.96229000 | -2.69161100 |
| C | -2.91516200 | -2.69411500 | -1.25721900 |
| H | -3.34133400 | -3.26693800 | -2.08282600 |
| H | -2.45155000 | -3.34087100 | -0.51449500 |
| H | -3.68635300 | -2.06243300 | -0.80790000 |

**S-TS2-RR**

Zero-point correction= 0.522357 (Hartree/Particle)  
Thermal correction to Energy= 0.556591  
Thermal correction to Enthalpy= 0.557535  
Thermal correction to Gibbs Free Energy= 0.454599

E(solv) = -2311.45224602 A.U.

|                     |             |             |             |
|---------------------|-------------|-------------|-------------|
| Imaginary Frequency | 368.46i     |             |             |
| C                   | 0.99523200  | 2.52442900  | 0.50177000  |
| C                   | 2.36663600  | 2.23298500  | 0.48558800  |
| C                   | 3.35206100  | 3.20973600  | 0.38491900  |
| C                   | 2.91769900  | 4.52427400  | 0.29606500  |
| C                   | 1.55037700  | 4.84635400  | 0.31438100  |
| C                   | 0.58007400  | 3.86171600  | 0.41918600  |
| C                   | 0.32320700  | 1.22967700  | 0.63239500  |
| C                   | 1.37226000  | 0.28699100  | 0.68787000  |
| H                   | 4.40349000  | 2.94386300  | 0.38914500  |
| H                   | 3.65187500  | 5.32030400  | 0.21546500  |
| H                   | 1.24842700  | 5.88626000  | 0.24840200  |
| H                   | -0.47196500 | 4.12030000  | 0.43240100  |
| O                   | 2.61562400  | 0.90523900  | 0.57953400  |
| C                   | 1.23350200  | -1.10273400 | 0.80085000  |
| H                   | 0.24249900  | -1.35877300 | 1.17262500  |
| N                   | -0.94947300 | 0.84523600  | 0.71623800  |
| C                   | 2.32395100  | -1.96354100 | 1.32704700  |
| C                   | 3.65522500  | -1.81221700 | 0.91818400  |
| C                   | 2.00579600  | -2.96850500 | 2.24505000  |
| C                   | 4.64250600  | -2.64150200 | 1.43772200  |
| H                   | 3.90197200  | -1.05107000 | 0.18593500  |
| C                   | 2.99741800  | -3.79326400 | 2.76764900  |
| H                   | 0.97319000  | -3.09457900 | 2.56175600  |
| C                   | 4.31972300  | -3.63037300 | 2.36570900  |
| H                   | 5.67177200  | -2.51535000 | 1.11560900  |
| H                   | 2.73603200  | -4.56232300 | 3.48818700  |
| H                   | 5.09539000  | -4.27319700 | 2.77038500  |
| S                   | -2.14039600 | 1.94739000  | 0.59555900  |
| O                   | -2.10791200 | 2.66772800  | -0.68180700 |
| O                   | -2.27757200 | 2.74719800  | 1.81435000  |
| C                   | -3.52360600 | 0.82234200  | 0.51823200  |
| C                   | -4.22876800 | 0.69563800  | -0.67045400 |
| C                   | -3.86232700 | 0.06781800  | 1.63942600  |
| C                   | -5.28219000 | -0.21509500 | -0.74076400 |
| H                   | -3.94262400 | 1.30748800  | -1.52055400 |
| C                   | -4.90951000 | -0.83998700 | 1.55200700  |
| H                   | -3.30341400 | 0.19660200  | 2.56172800  |

|   |             |             |             |
|---|-------------|-------------|-------------|
| C | -5.63402000 | -0.99412000 | 0.36300700  |
| H | -5.84272300 | -0.31771100 | -1.66687300 |
| H | -5.18017100 | -1.43581200 | 2.42042200  |
| C | -6.79362900 | -1.95535600 | 0.29659200  |
| H | -7.68579900 | -1.51855300 | 0.75861600  |
| H | -7.04552700 | -2.20469600 | -0.73754700 |
| H | -6.57189800 | -2.88423700 | 0.83032000  |
| C | 0.99596000  | -1.98734600 | -1.07479700 |
| H | 1.80098600  | -2.71226600 | -1.00874000 |
| C | 1.20408900  | -0.86521800 | -1.99685700 |
| O | 2.48909800  | -0.49463100 | -1.99516700 |
| O | 0.33405900  | -0.27300600 | -2.60699600 |
| C | 2.76519300  | 0.78752400  | -2.58809500 |
| H | 2.50152900  | 0.75081800  | -3.64916200 |
| H | 2.12689400  | 1.53593100  | -2.10668300 |
| C | 4.23436600  | 1.06584600  | -2.36697800 |
| H | 4.48839900  | 2.05558100  | -2.75597700 |
| H | 4.45936700  | 1.04348500  | -1.29739700 |
| H | 4.85322500  | 0.31970300  | -2.87298700 |
| S | -0.53802100 | -2.82929100 | -1.23051600 |
| C | -1.83095500 | -1.59098800 | -0.94949400 |
| H | -1.72396700 | -0.80227800 | -1.69494500 |
| H | -2.79250000 | -2.10601600 | -1.01390300 |
| H | -1.68070500 | -1.15731100 | 0.04083000  |
| C | -0.81229800 | -3.14300100 | -3.00229700 |
| H | -1.81293500 | -3.56447300 | -3.11992800 |
| H | -0.71184300 | -2.19647600 | -3.53515400 |
| H | -0.06221600 | -3.86416900 | -3.32911300 |

### S-TS2-SR

|                                          |                             |
|------------------------------------------|-----------------------------|
| Zero-point correction=                   | 0.522663 (Hartree/Particle) |
| Thermal correction to Energy=            | 0.556625                    |
| Thermal correction to Enthalpy=          | 0.557569                    |
| Thermal correction to Gibbs Free Energy= | 0.456108                    |

E(solv) = -2311.44746402 A.U.

Imaginary Frequency 404.09i

|   |             |            |             |
|---|-------------|------------|-------------|
| C | 1.75750900  | 2.67796000 | 0.16640800  |
| C | 0.60943600  | 3.27487700 | 0.71673000  |
| C | 0.64982900  | 4.30014000 | 1.65451200  |
| C | 1.90423200  | 4.73752000 | 2.04930500  |
| C | 3.07179900  | 4.17444700 | 1.50889400  |
| C | 3.01581900  | 3.15544900 | 0.57101700  |
| C | 1.24774400  | 1.67900800 | -0.78141000 |
| C | -0.15364600 | 1.82181600 | -0.71765600 |
| H | -0.26786100 | 4.72586800 | 2.04457400  |

|   |             |             |             |
|---|-------------|-------------|-------------|
| H | 1.98455500  | 5.53374600  | 2.78346600  |
| H | 4.03898000  | 4.54838000  | 1.82878000  |
| H | 3.91675700  | 2.72836000  | 0.15318400  |
| O | -0.54014400 | 2.76580200  | 0.21716200  |
| C | -1.06633100 | 0.95652300  | -1.33159700 |
| H | -0.69127500 | 0.56782600  | -2.27637500 |
| N | 1.73357900  | 0.72295900  | -1.57832700 |
| C | -2.52851800 | 1.19569300  | -1.27311600 |
| C | -3.17716000 | 1.42962700  | -0.05425500 |
| C | -3.28716800 | 1.12760600  | -2.44580200 |
| C | -4.56075200 | 1.55925300  | -0.01110000 |
| H | -2.58308900 | 1.51384900  | 0.85160100  |
| C | -4.67257300 | 1.27019300  | -2.40266100 |
| H | -2.78537400 | 0.95873900  | -3.39558100 |
| C | -5.31326400 | 1.47260500  | -1.18255500 |
| H | -5.05558200 | 1.73588100  | 0.93949900  |
| H | -5.24994000 | 1.22169800  | -3.32095300 |
| H | -6.39326400 | 1.57652800  | -1.14528000 |
| S | 3.20045300  | 0.05531100  | -1.47000000 |
| O | 4.17023000  | 0.83707200  | -0.70061300 |
| O | 3.58115300  | -0.43445200 | -2.78896400 |
| C | 2.83242800  | -1.39544300 | -0.48039000 |
| C | 2.46904400  | -1.22970200 | 0.85512400  |
| C | 2.83459500  | -2.65354500 | -1.06833500 |
| C | 2.10235600  | -2.34212700 | 1.60186400  |
| H | 2.44084300  | -0.23555500 | 1.29403100  |
| C | 2.48429500  | -3.76446000 | -0.30018000 |
| H | 3.11721500  | -2.74500600 | -2.11256000 |
| C | 2.11815700  | -3.62524600 | 1.04107300  |
| H | 1.80053700  | -2.21183900 | 2.63869500  |
| H | 2.50194600  | -4.75561700 | -0.74878400 |
| C | 1.75162300  | -4.82688200 | 1.87621900  |
| H | 2.58690000  | -5.12513400 | 2.51908700  |
| H | 0.90050200  | -4.61082800 | 2.53048900  |
| H | 1.49496400  | -5.68691400 | 1.25071800  |
| C | -0.75311700 | -0.83407900 | -0.40469600 |
| H | 0.28255900  | -0.84790900 | -0.74993900 |
| C | -0.90996000 | -0.57767100 | 1.02591900  |
| O | -2.03041600 | -1.13650900 | 1.56813400  |
| O | -0.17824200 | 0.14538900  | 1.66389400  |
| C | -2.31212700 | -0.75426900 | 2.92082100  |
| H | -1.54413200 | -1.17529600 | 3.57750100  |
| H | -2.25182700 | 0.33492900  | 3.00211500  |
| C | -3.69662700 | -1.27139200 | 3.24770800  |
| H | -3.96618100 | -1.00837400 | 4.27382900  |

|   |             |             |             |
|---|-------------|-------------|-------------|
| H | -4.43509800 | -0.82979900 | 2.57152800  |
| H | -3.74119900 | -2.36015400 | 3.14945600  |
| S | -1.57837400 | -2.18406300 | -1.16166800 |
| C | -1.28981500 | -3.65241000 | -0.12977100 |
| H | -1.65954900 | -3.45319500 | 0.87725200  |
| H | -1.80242900 | -4.50185300 | -0.58716500 |
| H | -0.20932100 | -3.81480000 | -0.12372600 |
| C | -3.36720700 | -2.00169400 | -0.92707700 |
| H | -3.81378200 | -2.92332900 | -1.30662300 |
| H | -3.58463000 | -1.85109100 | 0.12895900  |
| H | -3.70378900 | -1.15099800 | -1.51967500 |

### S-TS3-RR

|                                          |                             |
|------------------------------------------|-----------------------------|
| Zero-point correction=                   | 0.524121 (Hartree/Particle) |
| Thermal correction to Energy=            | 0.557923                    |
| Thermal correction to Enthalpy=          | 0.558867                    |
| Thermal correction to Gibbs Free Energy= | 0.457846                    |

E(solv) = -2311.46334239 A.U.

Imaginary Frequency 406.22i

|   |             |             |             |
|---|-------------|-------------|-------------|
| C | 2.88862500  | -0.35767700 | 0.59243500  |
| C | 2.73300100  | -0.53462900 | 1.97845400  |
| C | 3.72297500  | -1.06096000 | 2.79572200  |
| C | 4.91398800  | -1.41882200 | 2.17560500  |
| C | 5.09568000  | -1.25408200 | 0.79252700  |
| C | 4.09516200  | -0.72775400 | -0.01355200 |
| C | 1.62219400  | 0.20580100  | 0.15183100  |
| C | 0.86380700  | 0.29807400  | 1.26603200  |
| H | 3.56194500  | -1.18267200 | 3.86121500  |
| H | 5.71829800  | -1.83634100 | 2.77339800  |
| H | 6.04024400  | -1.54781700 | 0.34530300  |
| H | 4.22006200  | -0.60937500 | -1.08441200 |
| O | 1.49912200  | -0.12148700 | 2.39968300  |
| C | -0.52476800 | 0.84812100  | 1.31209600  |
| H | -0.52599800 | 1.75314300  | 1.93689600  |
| N | 1.11260900  | 0.73098300  | -1.02991700 |
| C | -1.51295100 | -0.15177500 | 1.89344900  |
| C | -2.16482600 | 0.11239000  | 3.09601700  |
| C | -1.78369200 | -1.33926800 | 1.21265400  |
| C | -3.09022000 | -0.79392300 | 3.60884100  |
| H | -1.94850900 | 1.03302800  | 3.63326600  |
| C | -2.71637500 | -2.23937100 | 1.71762800  |
| H | -1.24957400 | -1.56675200 | 0.29388700  |
| C | -3.37303900 | -1.96802900 | 2.91652700  |
| H | -3.59173900 | -0.58059200 | 4.54783800  |
| H | -2.92334700 | -3.15631200 | 1.17280400  |
| H | -4.09779100 | -2.67227100 | 3.31324300  |

|   |             |             |             |
|---|-------------|-------------|-------------|
| S | 1.10840800  | -0.19253200 | -2.36350000 |
| O | 2.45716900  | -0.67098900 | -2.66781500 |
| O | 0.33903000  | 0.52860000  | -3.37103600 |
| C | 0.15461100  | -1.65717700 | -1.96352000 |
| C | 0.72248900  | -2.66438300 | -1.18391000 |
| C | -1.16390700 | -1.75420800 | -2.39899100 |
| C | -0.05012700 | -3.76431800 | -0.82834800 |
| H | 1.76096700  | -2.58694500 | -0.87324000 |
| C | -1.92349100 | -2.86636200 | -2.03986100 |
| H | -1.56528800 | -0.96935000 | -3.03464100 |
| C | -1.37909700 | -3.88310000 | -1.25146300 |
| H | 0.38563300  | -4.54949600 | -0.21544600 |
| H | -2.95040800 | -2.95313600 | -2.38716500 |
| C | -2.18861500 | -5.10251400 | -0.88839300 |
| H | -1.94476700 | -5.94178700 | -1.54901700 |
| H | -1.98181600 | -5.42402200 | 0.13698200  |
| H | -3.26146300 | -4.91058200 | -0.98002400 |
| C | -0.90333200 | 1.27996200  | -0.11005000 |
| C | -0.35337700 | 2.52897600  | -0.73607100 |
| O | -0.70655400 | 2.95615300  | -1.81061100 |
| O | 0.44998700  | 3.17426300  | 0.11361600  |
| C | 2.32444200  | 4.56945000  | 0.52171800  |
| C | 1.26124100  | 4.19938500  | -0.48772400 |
| H | -1.27740700 | 0.54126800  | -0.81167100 |
| H | 2.98126400  | 5.33839100  | 0.10653600  |
| H | 1.87420500  | 4.95660500  | 1.43988600  |
| H | 2.92636400  | 3.69198600  | 0.77067700  |
| H | 1.68765000  | 3.78831100  | -1.40678400 |
| H | 0.62206100  | 5.04795900  | -0.75300300 |
| S | -2.99500500 | 2.00481200  | 0.23770700  |
| C | -2.86457400 | 3.81252200  | 0.21173800  |
| H | -2.25579300 | 4.10708900  | 1.06936800  |
| H | -2.38509100 | 4.13767200  | -0.71343200 |
| H | -3.86499900 | 4.23785000  | 0.30859700  |
| C | -3.55310100 | 1.68281300  | -1.45401000 |
| H | -3.67512300 | 0.60062100  | -1.54306500 |
| H | -4.51568300 | 2.17044400  | -1.61742400 |
| H | -2.79297000 | 2.04257000  | -2.15343200 |

### S-TS3-SR

|                                          |                             |
|------------------------------------------|-----------------------------|
| Zero-point correction=                   | 0.523964 (Hartree/Particle) |
| Thermal correction to Energy=            | 0.557892                    |
| Thermal correction to Enthalpy=          | 0.558837                    |
| Thermal correction to Gibbs Free Energy= | 0.457049                    |
| E(solv) = -2311.44949969                 | A.U.                        |

|                     |             |             |             |
|---------------------|-------------|-------------|-------------|
| Imaginary Frequency | 405.75i     |             |             |
| C                   | 1.41634400  | 2.62359000  | 0.00086500  |
| C                   | 1.01136000  | 3.16562800  | -1.23405600 |
| C                   | 1.53346600  | 4.33386900  | -1.77062900 |
| C                   | 2.49985200  | 4.98704900  | -1.01788600 |
| C                   | 2.91811300  | 4.47864700  | 0.22230300  |
| C                   | 2.38986500  | 3.30575300  | 0.74492400  |
| C                   | 0.61839000  | 1.40880100  | 0.14498900  |
| C                   | -0.13334500 | 1.35119600  | -0.97815300 |
| H                   | 1.18815200  | 4.70813000  | -2.72802600 |
| H                   | 2.93506300  | 5.90749600  | -1.39456900 |
| H                   | 3.67204900  | 5.01776000  | 0.78738800  |
| H                   | 2.71153700  | 2.91243800  | 1.70186600  |
| O                   | 0.04975000  | 2.40181500  | -1.83176400 |
| C                   | -1.20214400 | 0.32848100  | -1.19274200 |
| H                   | -1.22022000 | 0.10611000  | -2.26706800 |
| N                   | 0.34384200  | 0.44513000  | 1.10863200  |
| C                   | -2.58397400 | 0.84782600  | -0.80744000 |
| C                   | -2.77389100 | 1.51298000  | 0.40835600  |
| C                   | -3.65563300 | 0.73804200  | -1.69152600 |
| C                   | -4.02394800 | 2.01852700  | 0.73944900  |
| H                   | -1.93594700 | 1.60735800  | 1.09416000  |
| C                   | -4.91307400 | 1.24461700  | -1.36047600 |
| H                   | -3.51029700 | 0.28210400  | -2.66902800 |
| C                   | -5.09919500 | 1.88167500  | -0.13988700 |
| H                   | -4.16084400 | 2.52629300  | 1.68958700  |
| H                   | -5.73480900 | 1.15480100  | -2.06440700 |
| H                   | -6.07318500 | 2.28333800  | 0.12246900  |
| S                   | 1.53750300  | -0.16086100 | 2.01609400  |
| O                   | 0.91436500  | -1.13493600 | 2.91119100  |
| O                   | 2.37811200  | 0.89590400  | 2.58176900  |
| C                   | 2.58179400  | -1.07678300 | 0.88817100  |
| C                   | 2.36725800  | -2.44035600 | 0.70280600  |
| C                   | 3.52558300  | -0.38989600 | 0.12707600  |
| C                   | 3.11403100  | -3.11757900 | -0.25782300 |
| H                   | 1.62150500  | -2.94842200 | 1.30608000  |
| C                   | 4.26325300  | -1.08355200 | -0.82562800 |
| H                   | 3.68483100  | 0.67176900  | 0.29604100  |
| C                   | 4.07040300  | -2.45334600 | -1.03002700 |
| H                   | 2.95699100  | -4.18363300 | -0.40430000 |
| H                   | 5.00601400  | -0.55493400 | -1.41812100 |
| C                   | 4.90380600  | -3.20404200 | -2.03736500 |
| H                   | 5.15768100  | -2.57356700 | -2.89422600 |
| H                   | 5.84474600  | -3.54152200 | -1.58846500 |
| H                   | 4.37954800  | -4.09033400 | -2.40552900 |



|   |             |             |             |
|---|-------------|-------------|-------------|
| C | -0.69476500 | -0.93292800 | -0.47669000 |
| H | 0.34389700  | -1.17958100 | -0.68119900 |
| C | -1.18843400 | -1.63357300 | 0.77668600  |
| O | -2.11742500 | -0.99032400 | 1.45025600  |
| O | -0.77467600 | -2.73973000 | 1.04595400  |
| C | -2.36668800 | -1.48856000 | 2.78431300  |
| H | -2.89277300 | -2.44595300 | 2.70530600  |
| H | -1.39608900 | -1.64957300 | 3.25970200  |
| C | -3.18898700 | -0.43233600 | 3.48703500  |
| H | -3.42793200 | -0.76282600 | 4.50139300  |
| H | -2.61986300 | 0.49892200  | 3.54974300  |
| H | -4.12178000 | -0.23919900 | 2.94940500  |
| S | -1.36150100 | -2.66772800 | -1.73865200 |
| C | -1.64686500 | -2.08305600 | -3.42425000 |
| H | -0.70425600 | -1.68698100 | -3.80786000 |
| H | -1.95198000 | -2.93287200 | -4.03902000 |
| H | -2.41539300 | -1.30977600 | -3.45499500 |
| C | -3.07201100 | -2.89645100 | -1.18373800 |
| H | -3.59171000 | -1.93567700 | -1.14170300 |
| H | -3.57445300 | -3.58499700 | -1.86593000 |
| H | -3.01778300 | -3.34232900 | -0.18937300 |

#### trans-7

|                                          |                             |
|------------------------------------------|-----------------------------|
| Zero-point correction=                   | 0.447736 (Hartree/Particle) |
| Thermal correction to Energy=            | 0.476056                    |
| Thermal correction to Enthalpy=          | 0.477000                    |
| Thermal correction to Gibbs Free Energy= | 0.387018                    |

E(solv) = -1833.52061891 A.U.

|   |             |             |             |
|---|-------------|-------------|-------------|
| C | -0.66358000 | 2.35324600  | 0.18535500  |
| C | -1.46437700 | 2.71409500  | -0.92318200 |
| C | -1.63797600 | 4.02475800  | -1.34013700 |
| C | -0.98619000 | 5.00606500  | -0.60423000 |
| C | -0.19384900 | 4.67737600  | 0.50749400  |
| C | -0.02229100 | 3.36266400  | 0.91657900  |
| C | -0.76394300 | 0.91645400  | 0.20050000  |
| C | -1.56848800 | 0.56303300  | -0.81534600 |
| H | -2.25863000 | 4.25707200  | -2.19820500 |
| H | -1.09674100 | 6.04648600  | -0.89237400 |
| H | 0.29194300  | 5.47274300  | 1.06360400  |
| H | 0.57306800  | 3.10924000  | 1.78614100  |
| O | -2.03290100 | 1.62103100  | -1.52369800 |
| C | -1.91093200 | -0.89219000 | -0.85103800 |
| H | -1.73642200 | -1.34110100 | -1.83470600 |
| N | -0.41317900 | -0.22802900 | 0.95365300  |
| C | -3.33022900 | -1.19223500 | -0.40828100 |

|   |             |             |             |
|---|-------------|-------------|-------------|
| C | -3.80168900 | -0.71606700 | 0.81845500  |
| C | -4.17005300 | -1.96136500 | -1.21092000 |
| C | -5.09427700 | -1.01388700 | 1.23411100  |
| H | -3.14966700 | -0.11350000 | 1.44764400  |
| C | -5.46722800 | -2.25567400 | -0.79733800 |
| H | -3.80643600 | -2.33416300 | -2.16532700 |
| C | -5.93057800 | -1.78362300 | 0.42642100  |
| H | -5.45126700 | -0.64334300 | 2.18995600  |
| H | -6.11279900 | -2.85569300 | -1.43128000 |
| H | -6.94039800 | -2.01383000 | 0.75166800  |
| S | 0.83079600  | -0.28514800 | 2.05285500  |
| O | 0.66825400  | -1.54211800 | 2.75670900  |
| O | 0.79138000  | 1.00337000  | 2.72176500  |
| C | 2.36361800  | -0.36338800 | 1.15305200  |
| C | 3.14457100  | -1.50971400 | 1.23418800  |
| C | 2.77403200  | 0.74919000  | 0.41745100  |
| C | 4.37272700  | -1.53219900 | 0.57478500  |
| H | 2.79090200  | -2.36010200 | 1.80791400  |
| C | 3.99030100  | 0.69858400  | -0.24701200 |
| H | 2.15467200  | 1.64208600  | 0.37956700  |
| C | 4.80811900  | -0.43837100 | -0.17436800 |
| H | 4.99684000  | -2.41919100 | 0.63920500  |
| H | 4.32199700  | 1.55859800  | -0.82372600 |
| C | 6.12113100  | -0.47076000 | -0.91208400 |
| H | 6.72909400  | 0.40616800  | -0.66997300 |
| H | 6.69652400  | -1.36513500 | -0.66236400 |
| H | 5.95674200  | -0.46553700 | -1.99533700 |
| C | -0.82067000 | -1.42196200 | 0.16086900  |
| C | 0.36390600  | -2.01630900 | -0.59995100 |
| O | 0.81051400  | -3.11784200 | -0.40660700 |
| O | 0.83251800  | -1.15678000 | -1.51157600 |
| C | 2.32050700  | -0.51068000 | -3.24510200 |
| C | 1.98655400  | -1.59691100 | -2.24754900 |
| H | -1.20648100 | -2.18928800 | 0.83199000  |
| H | 3.21420800  | -0.78802400 | -3.81141800 |
| H | 1.49705100  | -0.36040000 | -3.94816500 |
| H | 2.51249900  | 0.43242100  | -2.72727100 |
| H | 2.79962000  | -1.76935700 | -1.53675700 |
| H | 1.75037700  | -2.54965800 | -2.73112300 |

## 2a-1

|                                          |                             |
|------------------------------------------|-----------------------------|
| Zero-point correction=                   | 0.096505 (Hartree/Particle) |
| Thermal correction to Energy=            | 0.104916                    |
| Thermal correction to Enthalpy=          | 0.105860                    |
| Thermal correction to Gibbs Free Energy= | 0.061226                    |

E(solv) = -2880.73036199 A.U.

|    |             |             |             |
|----|-------------|-------------|-------------|
| Br | 2.29348700  | -0.07002700 | -0.00029200 |
| C  | 0.48789600  | -0.69272000 | 0.00068700  |
| C  | -0.54187500 | 0.21924000  | 0.00042000  |
| O  | -0.56121300 | 1.45853600  | -0.00057300 |
| O  | -1.79416900 | -0.47366500 | 0.00162500  |
| C  | -4.14638900 | -0.49998900 | -0.00212200 |
| C  | -2.90607100 | 0.38005100  | 0.00154500  |
| H  | 0.37117600  | -1.76265500 | 0.00166500  |
| H  | -5.06103500 | 0.10410900  | -0.00205100 |
| H  | -4.15174100 | -1.14285800 | -0.88792000 |
| H  | -4.15426000 | -1.14675500 | 0.88083500  |
| H  | -2.89883400 | 1.03843800  | 0.88095800  |
| H  | -2.89566000 | 1.04222700  | -0.87485100 |

### 2a-CO<sub>3</sub>

|                                          |                             |
|------------------------------------------|-----------------------------|
| Zero-point correction=                   | 0.126483 (Hartree/Particle) |
| Thermal correction to Energy=            | 0.138141                    |
| Thermal correction to Enthalpy=          | 0.139085                    |
| Thermal correction to Gibbs Free Energy= | 0.086744                    |

E(solv) = -3145.27282467 A.U.

|    |             |             |             |
|----|-------------|-------------|-------------|
| Br | -2.67224900 | -0.04334100 | -0.17913200 |
| C  | -0.83242800 | -0.84354500 | -0.05692800 |
| C  | 0.15454200  | 0.16797200  | 0.59603100  |
| O  | -0.26963200 | 0.80190200  | 1.60722100  |
| O  | 0.50832900  | 1.02590300  | -0.59852200 |
| C  | 2.77658700  | 1.87309100  | -0.60359800 |
| C  | 1.31092300  | 2.10280500  | -0.22798300 |
| H  | -0.96643700 | -1.71518300 | 0.57901700  |
| H  | -0.58308600 | -1.12552000 | -1.07034400 |
| H  | 3.14130000  | 0.95648400  | -0.12724100 |
| H  | 2.87331700  | 1.74662500  | -1.68976000 |
| H  | 3.40458400  | 2.72746500  | -0.30241200 |
| H  | 0.94198100  | 3.01517500  | -0.73685600 |
| H  | 1.20590500  | 2.26691600  | 0.85368400  |
| C  | 2.06958800  | -1.40447500 | 0.01105800  |
| O  | 1.38813100  | -0.55688600 | 0.90876300  |
| O  | 1.39321800  | -2.09678700 | -0.78211200 |
| O  | 3.30943900  | -1.39039800 | 0.17115500  |

### 2a-TS1

|                                          |                             |
|------------------------------------------|-----------------------------|
| Zero-point correction=                   | 0.124730 (Hartree/Particle) |
| Thermal correction to Energy=            | 0.136323                    |
| Thermal correction to Enthalpy=          | 0.137267                    |
| Thermal correction to Gibbs Free Energy= | 0.085331                    |

E(solv) = -3145.26084838 A.U.

Imaginary Frequency 104.86i

|    |             |             |             |
|----|-------------|-------------|-------------|
| Br | -2.83888600 | -0.09851000 | -0.13765200 |
| C  | -0.86385200 | -0.31426800 | -0.25003900 |
| C  | -0.15699600 | 0.95073300  | 0.14216500  |
| O  | -0.50885100 | 1.73414700  | 0.99659500  |
| O  | 0.96903000  | 1.08585400  | -0.57799400 |
| C  | 3.29927100  | 1.46565200  | -0.76042300 |
| C  | 2.10390100  | 1.55707200  | 0.16446300  |
| H  | -0.44376800 | -1.04460500 | 0.49994700  |
| H  | -0.61982600 | -0.66333200 | -1.24691800 |
| H  | 3.44420500  | 0.39336500  | -0.95272800 |
| H  | 3.14261600  | 2.04750800  | -1.67960200 |
| H  | 4.18910000  | 1.85707700  | -0.24950300 |
| H  | 1.90408400  | 2.58059600  | 0.51389600  |
| H  | 2.22186600  | 0.85158000  | 0.99797700  |
| C  | 1.86252800  | -1.58698200 | 0.24328000  |
| O  | 1.14998800  | -1.12401300 | 1.26325600  |
| O  | 1.27438400  | -2.26587700 | -0.67122400 |
| O  | 3.12215500  | -1.30606000 | 0.20162500  |

#### INT1-A

Zero-point correction= 0.444646 (Hartree/Particle)

Thermal correction to Energy= 0.475879

Thermal correction to Enthalpy= 0.476823

Thermal correction to Gibbs Free Energy= 0.376916

E(solv) = -4407.83508942 A.U.

|    |             |             |             |
|----|-------------|-------------|-------------|
| C  | 1.76685000  | 5.32102500  | 0.13335500  |
| C  | 3.10442500  | 4.99167900  | 0.41029600  |
| C  | 3.50265800  | 3.66861300  | 0.56106500  |
| C  | 2.51620900  | 2.70017900  | 0.42633300  |
| C  | 1.17194200  | 3.00274000  | 0.15799900  |
| C  | 0.79118400  | 4.34083400  | 0.00477100  |
| O  | 2.70954200  | 1.36025500  | 0.53086500  |
| C  | 1.46237100  | 0.79353300  | 0.34281600  |
| C  | 0.48857500  | 1.71773200  | 0.10013100  |
| C  | 1.22053500  | -0.67679100 | 0.39376600  |
| C  | 0.80963200  | -1.18597300 | -1.01625300 |
| Br | 2.28131700  | -1.11566900 | -2.27633400 |
| N  | -0.80302000 | 1.32714100  | -0.18420800 |
| C  | -3.34183300 | 1.16377800  | 0.08928700  |
| C  | -4.04608400 | 0.98370800  | 1.27073100  |
| C  | -5.07721300 | 0.04677900  | 1.31999300  |
| C  | -5.41147100 | -0.71297200 | 0.19893000  |
| C  | -4.69466200 | -0.50618600 | -0.98630200 |

|   |             |             |             |
|---|-------------|-------------|-------------|
| C | -3.66595100 | 0.42563200  | -1.04686700 |
| C | -6.49688600 | -1.75886600 | 0.26458700  |
| S | -1.99676100 | 2.34883900  | 0.03669200  |
| O | -2.27232800 | 3.22633800  | -1.11715500 |
| O | -1.98755800 | 3.03325600  | 1.34358500  |
| C | 2.26286800  | -1.55627600 | 1.04528400  |
| C | 1.83536600  | -2.58489400 | 1.88985500  |
| C | 2.74593100  | -3.45947200 | 2.47616800  |
| C | 4.10656500  | -3.31415100 | 2.22446900  |
| C | 4.54361000  | -2.29322100 | 1.38418500  |
| C | 3.63265100  | -1.42122600 | 0.79514100  |
| C | 0.22050400  | -2.58397300 | -0.96006000 |
| O | 0.61235500  | -3.58206600 | -1.50488800 |
| O | -0.87075900 | -2.54537000 | -0.17244800 |
| C | -2.78636800 | -3.47594300 | 0.84430000  |
| C | -1.57734100 | -3.77697200 | -0.01684600 |
| H | 1.49210100  | 6.36562400  | 0.01781000  |
| H | 3.84203600  | 5.78344000  | 0.50875600  |
| H | 4.53025800  | 3.39178900  | 0.77318000  |
| H | -0.24230100 | 4.59222100  | -0.21382300 |
| H | 0.28173000  | -0.77842000 | 0.95619400  |
| H | 0.04610900  | -0.49465300 | -1.38490800 |
| H | -3.76990600 | 1.58033300  | 2.13450000  |
| H | -5.63053700 | -0.09831500 | 2.24564600  |
| H | -4.95239400 | -1.08545100 | -1.87104400 |
| H | -3.10950700 | 0.59254900  | -1.96420600 |
| H | -7.17711400 | -1.57278300 | 1.10082400  |
| H | -7.08764000 | -1.77904700 | -0.65668300 |
| H | -6.07155600 | -2.76082400 | 0.40159900  |
| H | 0.77117800  | -2.69334800 | 2.08953300  |
| H | 2.39158500  | -4.25010900 | 3.13165500  |
| H | 4.82306500  | -3.99222700 | 2.67982900  |
| H | 5.60460400  | -2.17265400 | 1.18391100  |
| H | 3.97741500  | -0.62872000 | 0.14189700  |
| H | -3.39009100 | -4.37885600 | 0.97890800  |
| H | -2.47537200 | -3.11181400 | 1.82725900  |
| H | -3.39857200 | -2.69900600 | 0.37696900  |
| H | -1.85758800 | -4.15284700 | -1.00628400 |
| H | -0.90869300 | -4.51504500 | 0.44004500  |

#### INT1-B

|                                          |                             |
|------------------------------------------|-----------------------------|
| Zero-point correction=                   | 0.445316 (Hartree/Particle) |
| Thermal correction to Energy=            | 0.476129                    |
| Thermal correction to Enthalpy=          | 0.477073                    |
| Thermal correction to Gibbs Free Energy= | 0.379892                    |

E(solv) = -4407.84042104 A.U.

|    |             |             |             |
|----|-------------|-------------|-------------|
| C  | 2.44931400  | 5.00883000  | 0.10196200  |
| C  | 1.71473300  | 5.27359900  | 1.26968900  |
| C  | 0.71275400  | 4.41191300  | 1.70717300  |
| C  | 0.47863800  | 3.28435100  | 0.93013000  |
| C  | 1.19886100  | 3.00127500  | -0.23131000 |
| C  | 2.19965600  | 3.87209600  | -0.65764600 |
| O  | -0.43543700 | 2.31393700  | 1.16130200  |
| C  | -0.28949800 | 1.38110900  | 0.12698800  |
| C  | 0.69009100  | 1.74282800  | -0.76464500 |
| C  | -1.26194400 | 0.25948900  | 0.15999200  |
| C  | -1.51951500 | -0.31598700 | 1.56238200  |
| Br | 0.14609500  | -0.76120300 | 2.48906300  |
| N  | 1.22485000  | 1.27949500  | -1.94424800 |
| C  | 2.21979700  | -1.15067800 | -1.33431300 |
| C  | 1.68707000  | -1.97026900 | -0.35086500 |
| C  | 2.54004400  | -2.61813100 | 0.54394000  |
| C  | 3.92059600  | -2.46217000 | 0.46068700  |
| C  | 4.44078900  | -1.63955200 | -0.54808600 |
| C  | 3.60184800  | -0.98224900 | -1.43485600 |
| C  | 4.84386000  | -3.14164700 | 1.44107700  |
| S  | 1.16214400  | -0.21242300 | -2.45139900 |
| O  | 1.82450900  | -0.27822900 | -3.75625600 |
| O  | -0.15489000 | -0.89064800 | -2.36206500 |
| C  | -2.62212000 | 0.59819600  | -0.44130600 |
| C  | -3.11644900 | -0.18463600 | -1.48719600 |
| C  | -4.37679600 | 0.07250500  | -2.02180900 |
| C  | -5.15263200 | 1.11245100  | -1.51850300 |
| C  | -4.65802400 | 1.90448900  | -0.48360800 |
| C  | -3.40039100 | 1.64832800  | 0.05330700  |
| C  | -2.33685300 | -1.58953300 | 1.43770100  |
| O  | -3.39643200 | -1.79530500 | 1.97275700  |
| O  | -1.74106200 | -2.43902700 | 0.59073000  |
| C  | -1.69165500 | -4.20084500 | -0.96538600 |
| C  | -2.51706200 | -3.54282800 | 0.12125000  |
| H  | 3.22446300  | 5.70511400  | -0.20596600 |
| H  | 1.93289600  | 6.16877400  | 1.84563900  |
| H  | 0.14030800  | 4.60267100  | 2.60899300  |
| H  | 2.75436500  | 3.64151700  | -1.56186000 |
| H  | -0.83885200 | -0.53201700 | -0.45502400 |
| H  | -2.04355700 | 0.37785900  | 2.21737200  |
| H  | 0.61242400  | -2.11396500 | -0.28636900 |
| H  | 2.11256200  | -3.24113500 | 1.32733300  |
| H  | 5.51912200  | -1.51500900 | -0.62945400 |
| H  | 3.99573700  | -0.34147800 | -2.21827600 |

|   |             |             |             |
|---|-------------|-------------|-------------|
| H | 4.31571500  | -3.90810100 | 2.01555700  |
| H | 5.68573400  | -3.62062600 | 0.92976000  |
| H | 5.26280900  | -2.42169200 | 2.15365200  |
| H | -2.47762600 | -0.95951000 | -1.90310600 |
| H | -4.74687000 | -0.53550300 | -2.84278100 |
| H | -6.13535500 | 1.31268800  | -1.93670500 |
| H | -5.25395900 | 2.72597800  | -0.09526900 |
| H | -3.00437300 | 2.27438600  | 0.84932100  |
| H | -2.25432500 | -5.01257200 | -1.43561000 |
| H | -1.41722100 | -3.46274500 | -1.72578400 |
| H | -0.76740100 | -4.61052500 | -0.54820000 |
| H | -2.73278600 | -4.21650500 | 0.95719600  |
| H | -3.46954300 | -3.15663100 | -0.25771200 |

### INT2-A-1

|                                          |                             |
|------------------------------------------|-----------------------------|
| Zero-point correction=                   | 0.444623 (Hartree/Particle) |
| Thermal correction to Energy=            | 0.473302                    |
| Thermal correction to Enthalpy=          | 0.474246                    |
| Thermal correction to Gibbs Free Energy= | 0.384551                    |
| E(solvent) = -1833.50761404              | A.U.                        |

|   |             |             |             |
|---|-------------|-------------|-------------|
| C | -3.07265600 | -0.66171700 | 0.04917200  |
| C | -3.99521300 | 0.32788100  | 0.41615900  |
| C | -5.36811900 | 0.12659100  | 0.34873200  |
| C | -5.79552500 | -1.11459200 | -0.10520400 |
| C | -4.89038700 | -2.12116800 | -0.47712100 |
| C | -3.52271200 | -1.90980900 | -0.40080700 |
| C | -1.75571100 | -0.08267300 | 0.28797600  |
| C | -2.03093100 | 1.32041800  | 0.70199500  |
| H | -6.05815300 | 0.90944100  | 0.64038800  |
| H | -6.86138000 | -1.31038800 | -0.17245200 |
| H | -5.26719800 | -3.07662000 | -0.82448500 |
| H | -2.82007800 | -2.68749800 | -0.67639000 |
| O | -3.42427300 | 1.48427900  | 0.84110400  |
| C | -1.23203200 | 2.47954400  | 0.14306900  |
| H | -1.87015500 | 3.35355700  | 0.01697600  |
| N | -0.53288400 | -0.46220800 | 0.20350200  |
| C | -0.21386800 | 2.31618200  | -0.94797500 |
| C | -0.54028700 | 1.60478000  | -2.10570800 |
| C | 1.02386200  | 2.95798300  | -0.87556700 |
| C | 0.35378200  | 1.52877100  | -3.16970500 |
| H | -1.49529700 | 1.08888800  | -2.17038300 |
| C | 1.92051500  | 2.88363600  | -1.93892700 |
| H | 1.28738500  | 3.50561100  | 0.02301400  |
| C | 1.58832800  | 2.17052500  | -3.08922300 |
| H | 0.08812600  | 0.95599100  | -4.05234600 |

|   |             |             |             |
|---|-------------|-------------|-------------|
| H | 2.87899900  | 3.38998100  | -1.86877100 |
| H | 2.28821000  | 2.11229500  | -3.91740300 |
| S | -0.14449300 | -1.94349900 | -0.46902900 |
| O | -0.51694300 | -1.90882100 | -1.87990600 |
| O | -0.61203600 | -3.04682800 | 0.36263200  |
| C | 1.61608000  | -1.82071800 | -0.31570900 |
| C | 2.27073800  | -0.80609700 | -1.01116800 |
| C | 2.29491100  | -2.69165400 | 0.52313400  |
| C | 3.64272900  | -0.67551600 | -0.85838000 |
| H | 1.70835300  | -0.12508600 | -1.64445900 |
| C | 3.67302900  | -2.53768700 | 0.66884300  |
| H | 1.74548600  | -3.45865000 | 1.05925600  |
| C | 4.36142100  | -1.53419800 | -0.01525600 |
| H | 4.16603700  | 0.11485300  | -1.39166500 |
| H | 4.21983000  | -3.20616400 | 1.32819500  |
| C | 5.85316900  | -1.37887200 | 0.13091100  |
| H | 6.13657800  | -0.32294800 | 0.17616600  |
| H | 6.21844700  | -1.87244000 | 1.03493200  |
| H | 6.37463800  | -1.82133600 | -0.72488300 |
| C | -1.10404900 | 2.08935900  | 1.59379000  |
| C | 0.03841800  | 1.33264000  | 2.23006100  |
| O | -0.12808600 | 0.54553400  | 3.12486700  |
| O | 1.22324300  | 1.67864000  | 1.72809600  |
| C | 3.58906100  | 1.60701200  | 1.66995700  |
| C | 2.34798900  | 0.91264900  | 2.18721000  |
| H | -1.62305700 | 2.73137500  | 2.30050700  |
| H | 4.47756900  | 1.02121400  | 1.92376800  |
| H | 3.53609300  | 1.70731900  | 0.58234500  |
| H | 3.68816100  | 2.60303100  | 2.11089900  |
| H | 2.32314600  | 0.86141500  | 3.27892100  |
| H | 2.24984500  | -0.10442500 | 1.79193800  |

## INT2-A

|                                          |                             |
|------------------------------------------|-----------------------------|
| Zero-point correction=                   | 0.444643 (Hartree/Particle) |
| Thermal correction to Energy=            | 0.473664                    |
| Thermal correction to Enthalpy=          | 0.474609                    |
| Thermal correction to Gibbs Free Energy= | 0.382192                    |

E(solv) = -1833.49973911 A.U.

|   |             |             |            |
|---|-------------|-------------|------------|
| C | -2.88728000 | -4.36289000 | 0.28521100 |
| C | -4.16031500 | -3.80762700 | 0.49249800 |
| C | -4.36741300 | -2.43538900 | 0.50155700 |
| C | -3.25082900 | -1.63492000 | 0.29610000 |
| C | -1.96854500 | -2.16282500 | 0.09258600 |
| C | -1.78206800 | -3.55285300 | 0.08161000 |
| O | -3.30231400 | -0.28109900 | 0.27105600 |



|   |             |             |             |
|---|-------------|-------------|-------------|
| C | -1.99335400 | 0.17008800  | 0.03870100  |
| C | -1.09486700 | -1.01085300 | -0.11566400 |
| C | -1.57445900 | 1.42711200  | 0.77962700  |
| C | -1.76584700 | 1.44340800  | -0.71222000 |
| N | 0.14802600  | -0.81003600 | -0.37674900 |
| C | 2.72882400  | -1.26264300 | -0.59165600 |
| C | 3.48488200  | -1.41175000 | -1.74600800 |
| C | 4.70308700  | -0.74432700 | -1.83538600 |
| C | 5.16072900  | 0.06194900  | -0.79069000 |
| C | 4.36874000  | 0.19567300  | 0.35549200  |
| C | 3.15449200  | -0.46742900 | 0.46740700  |
| C | 6.49612300  | 0.75403100  | -0.88436900 |
| S | 1.18997100  | -2.12412700 | -0.43687900 |
| O | 1.16611500  | -2.80512800 | 0.85355300  |
| O | 0.95897700  | -2.89381600 | -1.65438900 |
| C | -0.24631200 | 1.59207700  | 1.44662400  |
| C | 0.78954600  | 2.31341800  | 0.85388500  |
| C | 1.98695100  | 2.52195100  | 1.53284000  |
| C | 2.16552500  | 1.99878400  | 2.81051200  |
| C | 1.14545600  | 1.25253600  | 3.39941400  |
| C | -0.05295200 | 1.05318000  | 2.72182200  |
| C | -2.94273000 | 2.15216200  | -1.33860500 |
| O | -3.89696800 | 1.58210100  | -1.78520400 |
| O | -2.88413600 | 3.49977800  | -1.38408400 |
| C | -2.00594100 | 5.68070800  | -1.14477600 |
| C | -1.72407900 | 4.20690400  | -0.94104900 |
| H | -2.76838000 | -5.44064700 | 0.28267100  |
| H | -5.00771900 | -4.46904700 | 0.64654600  |
| H | -5.34446000 | -1.99116200 | 0.64983400  |
| H | -0.80087600 | -3.98373000 | -0.07598100 |
| H | -2.42249200 | 1.82264300  | 1.33994100  |
| H | -0.85015600 | 1.42652700  | -1.30420500 |
| H | 3.11603100  | -2.03823200 | -2.55179100 |
| H | 5.30757700  | -0.84890800 | -2.73256700 |
| H | 4.70849400  | 0.82851200  | 1.17208600  |
| H | 2.53702900  | -0.36407300 | 1.35633400  |
| H | 6.74750400  | 0.99397900  | -1.92085100 |
| H | 6.50455700  | 1.68098400  | -0.30467100 |
| H | 7.29206800  | 0.11170500  | -0.49132200 |
| H | 0.66155700  | 2.71604600  | -0.14674200 |
| H | 2.78293100  | 3.08686300  | 1.05707800  |
| H | 3.09779500  | 2.16345200  | 3.34276000  |
| H | 1.28176700  | 0.82707700  | 4.38872500  |
| H | -0.84948600 | 0.47429300  | 3.18264500  |
| H | -1.14537300 | 6.27576800  | -0.82821500 |

|   |             |            |             |
|---|-------------|------------|-------------|
| H | -2.20921400 | 5.88591400 | -2.19825000 |
| H | -2.87740200 | 5.98219400 | -0.55904300 |
| H | -1.52172200 | 3.98531200 | 0.11259800  |
| H | -0.85332800 | 3.89329100 | -1.53049000 |

### INT2-B-1

|                                          |                             |
|------------------------------------------|-----------------------------|
| Zero-point correction=                   | 0.444309 (Hartree/Particle) |
| Thermal correction to Energy=            | 0.472596                    |
| Thermal correction to Enthalpy=          | 0.473540                    |
| Thermal correction to Gibbs Free Energy= | 0.382166                    |
| E(solv) =                                | -1833.51037382 A.U.         |

|   |             |             |             |
|---|-------------|-------------|-------------|
| C | -1.54670300 | 2.30367400  | 0.01434900  |
| C | -2.87536600 | 1.97562700  | 0.31580300  |
| C | -3.87583200 | 2.93351900  | 0.42580200  |
| C | -3.49983900 | 4.25426400  | 0.22136500  |
| C | -2.17588100 | 4.60890700  | -0.08275300 |
| C | -1.18812700 | 3.64316000  | -0.19263000 |
| C | -0.82809800 | 1.03321400  | -0.03997400 |
| C | -1.84507900 | 0.01331200  | 0.35150600  |
| H | -4.89334000 | 2.64471600  | 0.66087300  |
| H | -4.25219400 | 5.03326500  | 0.29948000  |
| H | -1.92377200 | 5.65242400  | -0.23462900 |
| H | -0.16729900 | 3.91622400  | -0.42990900 |
| O | -3.09361300 | 0.64755800  | 0.48663500  |
| C | -1.53430800 | -1.12682400 | 1.27745000  |
| H | -2.40592600 | -1.37460200 | 1.88419400  |
| N | 0.36371200  | 0.64241000  | -0.31435100 |
| C | -0.19877700 | -1.31396100 | 1.92403100  |
| C | 0.30123800  | -0.34926900 | 2.80248800  |
| C | 0.53344900  | -2.48014900 | 1.70507400  |
| C | 1.50390700  | -0.55934900 | 3.46942900  |
| H | -0.25096600 | 0.57526300  | 2.95248200  |
| C | 1.73637600  | -2.69496300 | 2.37473300  |
| H | 0.15312900  | -3.22601300 | 1.01218200  |
| C | 2.22056300  | -1.73830100 | 3.26354500  |
| H | 1.88575400  | 0.20132500  | 4.14272000  |
| H | 2.29317100  | -3.61107300 | 2.20199300  |
| H | 3.15756100  | -1.90366000 | 3.78667000  |
| S | 1.55743300  | 1.78331700  | -0.60504600 |
| O | 1.75482000  | 2.55887300  | 0.61556500  |
| O | 1.30522100  | 2.49119800  | -1.85642700 |
| C | 2.92971300  | 0.69065400  | -0.84235000 |
| C | 3.21543400  | -0.25422300 | 0.14070500  |
| C | 3.71188600  | 0.82370700  | -1.97924900 |
| C | 4.31238300  | -1.08311800 | -0.03292300 |

|   |             |             |             |
|---|-------------|-------------|-------------|
| H | 2.57748700  | -0.34170700 | 1.01555600  |
| C | 4.81494900  | -0.01460300 | -2.13129800 |
| H | 3.45090600  | 1.56445900  | -2.72796000 |
| C | 5.12806600  | -0.97341200 | -1.16776500 |
| H | 4.54042200  | -1.83062400 | 0.72339000  |
| H | 5.43851900  | 0.07621900  | -3.01628400 |
| C | 6.31495000  | -1.88674900 | -1.33594500 |
| H | 7.00088100  | -1.79729600 | -0.48761600 |
| H | 5.99804600  | -2.93337900 | -1.39069800 |
| H | 6.87039900  | -1.65373500 | -2.24737800 |
| C | -1.77482100 | -1.39966800 | -0.18049600 |
| C | -3.06586500 | -2.05189400 | -0.55470500 |
| O | -4.02326000 | -2.14164200 | 0.17384200  |
| O | -3.01801100 | -2.51270500 | -1.81083300 |
| C | -4.30387900 | -4.58244900 | -1.78655100 |
| C | -4.21407800 | -3.15330800 | -2.28825100 |
| H | -0.91871300 | -1.57985200 | -0.82485500 |
| H | -5.17917700 | -5.07477600 | -2.21967400 |
| H | -3.41212300 | -5.14498200 | -2.07509200 |
| H | -4.40143000 | -4.59723400 | -0.69895300 |
| H | -5.07769800 | -2.56565400 | -1.96881100 |
| H | -4.12736800 | -3.11229100 | -3.37509100 |

## INT2-B

|                                          |                             |
|------------------------------------------|-----------------------------|
| Zero-point correction=                   | 0.444478 (Hartree/Particle) |
| Thermal correction to Energy=            | 0.473589                    |
| Thermal correction to Enthalpy=          | 0.474533                    |
| Thermal correction to Gibbs Free Energy= | 0.380444                    |

E(solv) = -1833.50690567 A.U.

|   |             |             |             |
|---|-------------|-------------|-------------|
| C | -1.11809700 | 2.18554200  | -0.61913300 |
| C | -2.50384000 | 2.04352500  | -0.45073500 |
| C | -3.39893500 | 3.07591800  | -0.70197300 |
| C | -2.85863000 | 4.28282400  | -1.12440500 |
| C | -1.47567900 | 4.45482900  | -1.29195900 |
| C | -0.59369200 | 3.41462500  | -1.04561700 |
| C | -0.54422100 | 0.89065700  | -0.26177500 |
| C | -1.71069200 | 0.07584300  | 0.18183300  |
| H | -4.46345700 | 2.92878800  | -0.56332200 |
| H | -3.52530100 | 5.11531600  | -1.32813000 |
| H | -1.09284900 | 5.41425600  | -1.62156700 |
| H | 0.47240200  | 3.53822900  | -1.18966400 |
| O | -2.88881600 | 0.81525300  | -0.02325500 |
| C | -1.74722600 | -1.42749600 | 0.11420600  |
| H | -0.81146500 | -1.84348400 | -0.26238200 |
| N | 0.61922800  | 0.34479800  | -0.20921200 |

|   |             |             |             |
|---|-------------|-------------|-------------|
| C | -3.00995200 | -2.12544800 | -0.27485200 |
| C | -3.60001000 | -1.87386100 | -1.51490400 |
| C | -3.59448500 | -3.05491000 | 0.58546400  |
| C | -4.75859500 | -2.54595200 | -1.88987700 |
| H | -3.15004900 | -1.14191500 | -2.18008700 |
| C | -4.75262900 | -3.73018700 | 0.20982400  |
| H | -3.13230600 | -3.25109700 | 1.54946500  |
| C | -5.33659700 | -3.47596000 | -1.02814800 |
| H | -5.21328800 | -2.34118800 | -2.85414000 |
| H | -5.19873000 | -4.45397500 | 0.88482100  |
| H | -6.24144600 | -3.99952200 | -1.32075800 |
| S | 2.01191500  | 1.21614000  | -0.49021600 |
| O | 2.32484300  | 1.94092800  | 0.74018300  |
| O | 1.95362500  | 1.96441800  | -1.74362400 |
| C | 3.15544000  | -0.12050700 | -0.70955600 |
| C | 3.14222800  | -1.21280400 | 0.15785200  |
| C | 4.09821300  | -0.00508500 | -1.72261500 |
| C | 4.10237700  | -2.20078600 | -0.00787800 |
| H | 2.37971200  | -1.30306700 | 0.92717400  |
| C | 5.05491300  | -1.00651200 | -1.86658200 |
| H | 4.06978500  | 0.85088600  | -2.38868000 |
| C | 5.07113700  | -2.11183800 | -1.01569400 |
| H | 4.09876800  | -3.06256900 | 0.65442900  |
| H | 5.79695800  | -0.92822700 | -2.65621600 |
| C | 6.09599000  | -3.20445200 | -1.17782400 |
| H | 6.62036700  | -3.39243700 | -0.23588800 |
| H | 5.61966000  | -4.14318700 | -1.47942200 |
| H | 6.83884400  | -2.94431600 | -1.93552600 |
| C | -1.62039200 | -0.75548100 | 1.44025000  |
| C | -0.30525200 | -0.78300600 | 2.17399200  |
| O | 0.44361200  | -1.72897400 | 2.20078900  |
| O | -0.08772800 | 0.38125200  | 2.78085100  |
| C | 1.30194800  | 1.96813200  | 3.86992000  |
| C | 1.19350600  | 0.52862500  | 3.42339200  |
| H | -2.51105600 | -0.69008700 | 2.06095500  |
| H | 2.25611200  | 2.12391400  | 4.38026800  |
| H | 1.26504100  | 2.62532600  | 2.99856000  |
| H | 0.49144400  | 2.22609600  | 4.55681200  |
| H | 1.24774200  | -0.18129800 | 4.25460400  |
| H | 1.97261100  | 0.28129600  | 2.69785000  |

### N-INT3-RR-2

|                                 |                             |
|---------------------------------|-----------------------------|
| Zero-point correction=          | 0.637125 (Hartree/Particle) |
| Thermal correction to Energy=   | 0.672778                    |
| Thermal correction to Enthalpy= | 0.673722                    |

Thermal correction to Gibbs Free Energy= 0.567489

E(solv) = -2178.80526130 A.U.

|   |             |             |             |
|---|-------------|-------------|-------------|
| C | -0.34189000 | 3.41226200  | 0.37873600  |
| C | -1.73566900 | 3.47791100  | 0.33264900  |
| C | -2.44501400 | 4.65627900  | 0.13535500  |
| C | -1.68958400 | 5.81061200  | -0.02185700 |
| C | -0.28595100 | 5.77507700  | 0.02425200  |
| C | 0.40418400  | 4.58775500  | 0.22562700  |
| C | -0.00732800 | 2.00483400  | 0.60809600  |
| C | -1.21682400 | 1.36090200  | 0.68917600  |
| H | -3.52932300 | 4.66182000  | 0.11154600  |
| H | -2.19440700 | 6.75899200  | -0.17950900 |
| H | 0.26974700  | 6.69952300  | -0.09759600 |
| H | 1.48825900  | 4.55554100  | 0.26135600  |
| O | -2.28059800 | 2.25073800  | 0.52265900  |
| C | -1.77655500 | -0.03083600 | 0.80975200  |
| H | -2.76937900 | 0.16319400  | 1.22973200  |
| N | 1.22829300  | 1.41422400  | 0.76037600  |
| C | -1.15063000 | -1.06908700 | 1.72969000  |
| C | 0.21010400  | -1.12215600 | 2.04043100  |
| C | -1.99757700 | -2.05938000 | 2.24634000  |
| C | 0.71127700  | -2.17072000 | 2.81160600  |
| H | 0.87151500  | -0.33787300 | 1.67527000  |
| C | -1.49502500 | -3.10455400 | 3.01329400  |
| H | -3.06854100 | -2.00547400 | 2.05826400  |
| C | -0.13080600 | -3.17018100 | 3.28914200  |
| H | 1.77462300  | -2.19844500 | 3.03287200  |
| H | -2.16982700 | -3.86119000 | 3.40182500  |
| H | 0.26656800  | -3.98597500 | 3.88539900  |
| S | 2.41999200  | 1.81767800  | -0.21246500 |
| O | 3.13750200  | 3.05452900  | 0.12711000  |
| O | 2.05883800  | 1.68328600  | -1.64602300 |
| C | 3.52636300  | 0.45491900  | 0.14709300  |
| C | 4.24175200  | -0.11655000 | -0.89717900 |
| C | 3.70377500  | 0.00357000  | 1.45503100  |
| C | 5.12192700  | -1.16644000 | -0.63536300 |
| H | 4.10492300  | 0.26849000  | -1.90372100 |
| C | 4.58378600  | -1.04202800 | 1.70133700  |
| H | 3.14610300  | 0.47375200  | 2.25967500  |
| C | 5.30234800  | -1.64567800 | 0.66129500  |
| H | 5.68042100  | -1.61556700 | -1.45296900 |
| H | 4.72646000  | -1.39573100 | 2.72049000  |
| C | 6.24505500  | -2.78645800 | 0.94952000  |
| H | 5.69859400  | -3.67715800 | 1.27885600  |
| H | 6.82344400  | -3.05719800 | 0.06259000  |

|   |             |             |             |
|---|-------------|-------------|-------------|
| H | 6.94858500  | -2.52358000 | 1.74574300  |
| C | -2.19311700 | -0.60931900 | -0.60690700 |
| C | -3.41925300 | -1.52284600 | -0.49491400 |
| O | -3.52209700 | -2.65770800 | -0.89791300 |
| O | -4.41012300 | -0.86504100 | 0.10092500  |
| C | -6.59535700 | -0.69135700 | 1.01723000  |
| C | -5.63416300 | -1.60500200 | 0.29223700  |
| H | -2.52649600 | 0.26978100  | -1.17150300 |
| H | -7.54119700 | -1.21189000 | 1.18743200  |
| H | -6.18551700 | -0.38898300 | 1.98402900  |
| H | -6.79357700 | 0.20704600  | 0.42804200  |
| H | -6.00631800 | -1.91458900 | -0.68830900 |
| H | -5.40193000 | -2.50827800 | 0.86423300  |
| N | -1.12141100 | -1.24131800 | -1.47847600 |
| C | -0.63142900 | -2.60827000 | -1.01946200 |
| C | 1.01505400  | -0.80013800 | -2.68950000 |
| C | -0.61617100 | -2.18230000 | -3.72251000 |
| C | -1.64766100 | -1.38115200 | -2.89325500 |
| C | 0.08757600  | -0.31384000 | -1.55527800 |
| C | 0.61780300  | -2.97328200 | -1.85394100 |
| N | 0.68873900  | -2.17468800 | -3.07443300 |
| H | -0.41253100 | -2.54450500 | 0.04374300  |
| H | -1.45484800 | -3.30026800 | -1.17731300 |
| H | 2.04749900  | -0.74798000 | -2.34468000 |
| H | 0.93170600  | -0.15076700 | -3.56494600 |
| H | -0.52965100 | -1.74054600 | -4.71910700 |
| H | -0.94273900 | -3.22000600 | -3.84176100 |
| H | -1.77028700 | -0.36016900 | -3.26493200 |
| H | -2.61611500 | -1.87626900 | -2.85053900 |
| H | -0.27440800 | 0.70105200  | -1.71923400 |
| H | 0.57119900  | -0.33897300 | -0.57661600 |
| H | 1.53306300  | -2.79356600 | -1.28145000 |
| H | 0.58097500  | -4.03628800 | -2.11015000 |

### N-INT3-SR-2

|                                          |                             |
|------------------------------------------|-----------------------------|
| Zero-point correction=                   | 0.637410 (Hartree/Particle) |
| Thermal correction to Energy=            | 0.672741                    |
| Thermal correction to Enthalpy=          | 0.673685                    |
| Thermal correction to Gibbs Free Energy= | 0.568907                    |

E(solvent) = -2178.80556335 A.U.

|   |            |            |            |
|---|------------|------------|------------|
| C | 0.46165300 | 2.81081000 | 0.98805100 |
| C | 1.85157800 | 2.70579300 | 1.00451800 |
| C | 2.70863500 | 3.79920300 | 1.02419500 |
| C | 2.10274100 | 5.04963000 | 1.02213500 |
| C | 0.70324400 | 5.18593300 | 0.99863400 |

|   |             |             |             |
|---|-------------|-------------|-------------|
| C | -0.13094700 | 4.07738600  | 0.97975400  |
| C | -0.04797400 | 1.44328700  | 0.97851900  |
| C | 1.05684200  | 0.64358300  | 0.96334400  |
| H | 3.78651900  | 3.67649400  | 1.04338500  |
| H | 2.72451800  | 5.93949000  | 1.03445700  |
| H | 0.27153700  | 6.18164300  | 0.98767500  |
| H | -1.21042100 | 4.16434100  | 0.92637500  |
| O | 2.23322700  | 1.39311500  | 0.99485500  |
| C | 1.08104400  | -0.84952300 | 0.91241500  |
| H | 0.03265000  | -1.07313600 | 1.14511100  |
| N | -1.36430000 | 1.00772300  | 0.98952200  |
| C | 1.92049100  | -1.56080300 | 1.97559200  |
| C | 2.93090200  | -0.94537800 | 2.71578400  |
| C | 1.63242400  | -2.90817600 | 2.23111200  |
| C | 3.64846900  | -1.66853300 | 3.66918500  |
| H | 3.15347800  | 0.10359800  | 2.55940900  |
| C | 2.34682200  | -3.62906600 | 3.18046000  |
| H | 0.81632800  | -3.38611900 | 1.69067100  |
| C | 3.36598200  | -3.00970800 | 3.90155600  |
| H | 4.42991100  | -1.17191200 | 4.23644100  |
| H | 2.09894100  | -4.66946300 | 3.36747600  |
| H | 3.92552200  | -3.56675000 | 4.64645000  |
| S | -2.03397800 | 1.22626800  | -0.43167000 |
| O | -1.42367800 | 0.36115700  | -1.48269800 |
| O | -2.17960700 | 2.63052400  | -0.85398200 |
| C | -3.67185800 | 0.57811100  | -0.14533400 |
| C | -4.38196800 | 0.08762000  | -1.23670300 |
| C | -4.24810400 | 0.60721300  | 1.12090700  |
| C | -5.67317800 | -0.39689600 | -1.05162500 |
| H | -3.91025000 | 0.07551600  | -2.21546900 |
| C | -5.53835200 | 0.11562600  | 1.29169800  |
| H | -3.66590300 | 0.98474600  | 1.95490000  |
| C | -6.26894100 | -0.39047600 | 0.21267800  |
| H | -6.22843200 | -0.78789100 | -1.90091800 |
| H | -5.98788700 | 0.12225900  | 2.28179400  |
| C | -7.67853400 | -0.89011600 | 0.40423100  |
| H | -8.39824700 | -0.06873300 | 0.31435400  |
| H | -7.94045400 | -1.64042400 | -0.34689500 |
| H | -7.81110100 | -1.33556100 | 1.39414200  |
| C | 1.27281100  | -1.56514800 | -0.48684500 |
| C | -0.04920900 | -1.92059300 | -1.20410000 |
| O | -0.19773500 | -1.98373800 | -2.40062300 |
| O | -0.93314100 | -2.32719300 | -0.31185600 |
| C | -3.15990300 | -2.80064100 | 0.36338100  |
| C | -2.24783300 | -2.63749300 | -0.82970900 |

|   |             |             |             |
|---|-------------|-------------|-------------|
| H | 1.71563100  | -2.54442100 | -0.26336500 |
| H | -4.19091700 | -2.93024600 | 0.02221800  |
| H | -2.87402500 | -3.66727700 | 0.96632000  |
| H | -3.11768300 | -1.90220800 | 0.98432300  |
| H | -2.53986500 | -1.80294800 | -1.46920600 |
| H | -2.16872400 | -3.54571900 | -1.43546100 |
| N | 2.26467200  | -0.94006700 | -1.44781100 |
| C | 3.56495800  | -0.65821900 | -0.72049400 |
| C | 2.90557100  | 1.04982500  | -2.76678800 |
| C | 3.45399800  | -1.10468100 | -3.61531400 |
| C | 2.64380300  | -1.90022700 | -2.56585500 |
| C | 1.72344300  | 0.33379900  | -2.08576600 |
| C | 4.63160600  | -0.23785200 | -1.76044700 |
| N | 4.00602200  | 0.11513300  | -3.03156400 |
| H | 3.37276300  | 0.13276500  | -0.00289000 |
| H | 3.82788900  | -1.57204400 | -0.18081400 |
| H | 3.28698500  | 1.85742800  | -2.13466000 |
| H | 2.57100100  | 1.49273200  | -3.70834700 |
| H | 2.81703800  | -0.82629400 | -4.45927900 |
| H | 4.26728100  | -1.72687300 | -4.00001100 |
| H | 1.73269900  | -2.32136000 | -2.97748100 |
| H | 3.23828500  | -2.68599200 | -2.09061900 |
| H | 0.94642800  | 0.01061500  | -2.77868900 |
| H | 1.23747000  | 0.92764400  | -1.31317200 |
| H | 5.18722000  | 0.62373500  | -1.38128600 |
| H | 5.34887200  | -1.04409900 | -1.94180400 |

#### N-TS4-A-1

|                                          |                             |
|------------------------------------------|-----------------------------|
| Zero-point correction=                   | 0.633263 (Hartree/Particle) |
| Thermal correction to Energy=            | 0.669275                    |
| Thermal correction to Enthalpy=          | 0.670220                    |
| Thermal correction to Gibbs Free Energy= | 0.562993                    |

E(solv) = -2178.76574656 A.U.

|                     |             |            |             |
|---------------------|-------------|------------|-------------|
| Imaginary Frequency | 474.38i     |            |             |
| C                   | -1.36506400 | 2.95212200 | -0.78696700 |
| C                   | -0.28915100 | 3.64296900 | -1.35504500 |
| C                   | -0.28413200 | 5.01629700 | -1.56399700 |
| C                   | -1.41810600 | 5.70806600 | -1.16203400 |
| C                   | -2.50883700 | 5.04519000 | -0.57712600 |
| C                   | -2.50029600 | 3.67120600 | -0.38509700 |
| C                   | -0.95863700 | 1.54190600 | -0.73661200 |
| C                   | 0.34037400  | 1.53791900 | -1.27493500 |
| H                   | 0.56948800  | 5.50791400 | -2.01685700 |
| H                   | -1.46106500 | 6.78383000 | -1.30344500 |
| H                   | -3.37921300 | 5.61860200 | -0.27592300 |



|   |             |             |             |
|---|-------------|-------------|-------------|
| H | -3.35444500 | 3.16640400  | 0.05033800  |
| O | 0.73800700  | 2.81436200  | -1.66784300 |
| C | 1.40994800  | 0.49933000  | -1.44821300 |
| H | 2.17109100  | 0.97970800  | -2.06880800 |
| N | -1.54070700 | 0.43710900  | -0.26960200 |
| C | 1.16000200  | -0.88731600 | -1.99715800 |
| C | 0.20831200  | -1.77761400 | -1.49118700 |
| C | 1.97440000  | -1.30079000 | -3.05737600 |
| C | 0.09400400  | -3.05511100 | -2.03199300 |
| H | -0.45294500 | -1.46303800 | -0.69404700 |
| C | 1.86117300  | -2.58035600 | -3.59419900 |
| H | 2.70585100  | -0.60964000 | -3.47283600 |
| C | 0.91925200  | -3.46460100 | -3.07652800 |
| H | -0.65695800 | -3.72910700 | -1.62976800 |
| H | 2.50068800  | -2.87945800 | -4.41913200 |
| H | 0.82130500  | -4.46253700 | -3.49319500 |
| S | -3.04518700 | 0.45996900  | 0.32589500  |
| O | -4.03395800 | 1.02125000  | -0.60016200 |
| O | -3.07115700 | 0.99160500  | 1.69931200  |
| C | -3.33825500 | -1.29641700 | 0.40600800  |
| C | -4.49605200 | -1.80164300 | -0.16915300 |
| C | -2.43359100 | -2.13254300 | 1.05740400  |
| C | -4.75169900 | -3.16837100 | -0.08987900 |
| H | -5.17109500 | -1.12344100 | -0.68094900 |
| C | -2.70122200 | -3.49451200 | 1.12033200  |
| H | -1.51919500 | -1.72562100 | 1.48183300  |
| C | -3.86385400 | -4.03054700 | 0.55450200  |
| H | -5.65434100 | -3.57224400 | -0.54146000 |
| H | -1.99641300 | -4.15679000 | 1.61769200  |
| C | -4.16035500 | -5.50459300 | 0.66349500  |
| H | -4.79180700 | -5.84470400 | -0.16170700 |
| H | -3.24070200 | -6.09649000 | 0.65800600  |
| H | -4.68857000 | -5.72707900 | 1.59753900  |
| C | 1.74237200  | 0.76105000  | -0.02065600 |
| C | 0.91151300  | 0.27323400  | 1.14228200  |
| O | 0.67840100  | -0.88943000 | 1.38368300  |
| O | 0.57117700  | 1.29379600  | 1.91463200  |
| C | -0.85723600 | 2.30814100  | 3.51790200  |
| C | -0.27772500 | 0.99567200  | 3.04710100  |
| H | 2.18964900  | 1.73815200  | 0.14940000  |
| H | -1.51352500 | 2.12804500  | 4.37332800  |
| H | -0.07042500 | 3.00737300  | 3.81509400  |
| H | -1.45798700 | 2.74445600  | 2.71676600  |
| H | -1.06812400 | 0.32000600  | 2.71862400  |
| H | 0.33813200  | 0.50097500  | 3.80723000  |

|   |            |             |             |
|---|------------|-------------|-------------|
| N | 5.70604900 | -1.12311200 | 1.18563000  |
| C | 5.84406400 | -0.28308400 | -0.00321200 |
| C | 3.71157100 | 0.14146100  | 1.93119400  |
| C | 3.43058400 | -1.64261600 | 0.32308700  |
| C | 4.76445000 | -2.20730500 | 0.89232600  |
| C | 5.15998400 | -0.30884800 | 2.27125300  |
| C | 4.49196900 | 0.41353400  | -0.33555400 |
| N | 3.43175300 | -0.16972900 | 0.51081500  |
| H | 6.62825200 | 0.45839100  | 0.17604500  |
| H | 6.16814100 | -0.91790000 | -0.83337900 |
| H | 3.56140900 | 1.21642200  | 2.08220500  |
| H | 2.96874600 | -0.39492100 | 2.52857300  |
| H | 2.54652000 | -2.04424200 | 0.82134200  |
| H | 3.33033700 | -1.83406500 | -0.74833300 |
| H | 4.59214500 | -2.76258800 | 1.81965100  |
| H | 5.22853800 | -2.89286900 | 0.17718800  |
| H | 5.17422500 | -0.89522500 | 3.19443500  |
| H | 5.81809800 | 0.55410100  | 2.41410200  |
| H | 4.52368400 | 1.49069300  | -0.13752500 |
| H | 4.20551100 | 0.26387100  | -1.38102400 |

#### N-TS4-A

|                                          |                             |
|------------------------------------------|-----------------------------|
| Zero-point correction=                   | 0.633631 (Hartree/Particle) |
| Thermal correction to Energy=            | 0.669469                    |
| Thermal correction to Enthalpy=          | 0.670414                    |
| Thermal correction to Gibbs Free Energy= | 0.563998                    |

E(solv) = -2178.76609348 A.U.

|                     |             |             |             |
|---------------------|-------------|-------------|-------------|
| Imaginary Frequency | 449.69i     |             |             |
| C                   | -1.90964600 | 2.91994500  | -0.10857900 |
| C                   | -3.08344300 | 2.20872300  | 0.18025700  |
| C                   | -4.23249900 | 2.80049900  | 0.68714600  |
| C                   | -4.18305000 | 4.17143300  | 0.89859600  |
| C                   | -3.02684500 | 4.91355400  | 0.60772500  |
| C                   | -1.88670400 | 4.30523500  | 0.10471700  |
| C                   | -0.97613100 | 1.92867100  | -0.64624500 |
| C                   | -1.69139700 | 0.71663700  | -0.59546700 |
| H                   | -5.11729900 | 2.20956500  | 0.89593900  |
| H                   | -5.05757500 | 4.67877500  | 1.29412300  |
| H                   | -3.02570900 | 5.98423900  | 0.78262700  |
| H                   | -0.98897600 | 4.87472800  | -0.10079300 |
| O                   | -2.97312200 | 0.88129000  | -0.10961700 |
| C                   | -1.13109100 | -0.59320700 | -1.03631800 |
| H                   | -0.39292500 | -0.35836700 | -1.80930800 |
| N                   | 0.27581300  | 1.91195800  | -1.10729700 |
| C                   | -2.01819700 | -1.71927800 | -1.52207700 |

|   |             |             |             |
|---|-------------|-------------|-------------|
| C | -3.32142100 | -1.94770600 | -1.06748900 |
| C | -1.52717100 | -2.53444300 | -2.54865400 |
| C | -4.07839700 | -2.99397700 | -1.58574500 |
| H | -3.74617800 | -1.29631000 | -0.31716000 |
| C | -2.27973900 | -3.58706700 | -3.06268000 |
| H | -0.55205000 | -2.32189800 | -2.97918300 |
| C | -3.55877100 | -3.82770500 | -2.57271400 |
| H | -5.08857200 | -3.15077700 | -1.21868600 |
| H | -1.87172900 | -4.20269500 | -3.85832100 |
| H | -4.15432300 | -4.64280300 | -2.97189900 |
| S | 1.34003900  | 3.11140900  | -0.87291900 |
| O | 1.04932200  | 3.92646200  | 0.31128900  |
| O | 1.63498000  | 3.79432900  | -2.12909200 |
| C | 2.77767600  | 2.12194600  | -0.46800000 |
| C | 3.31142400  | 2.17085600  | 0.81270000  |
| C | 3.34211700  | 1.30473200  | -1.44702200 |
| C | 4.42105600  | 1.38114100  | 1.11922400  |
| H | 2.85391400  | 2.82232700  | 1.55057200  |
| C | 4.44067300  | 0.51709000  | -1.12495400 |
| H | 2.92005100  | 1.30106900  | -2.44809300 |
| C | 4.99876800  | 0.54587600  | 0.16137700  |
| H | 4.84597000  | 1.41900300  | 2.11926800  |
| H | 4.89235900  | -0.11534400 | -1.88666200 |
| C | 6.22298000  | -0.27563800 | 0.48050800  |
| H | 6.33677100  | -0.41934000 | 1.55854900  |
| H | 6.17968200  | -1.26159200 | 0.00615400  |
| H | 7.12865500  | 0.22123800  | 0.11581300  |
| C | -0.42102300 | -0.55620900 | 0.29004800  |
| C | -1.08256500 | -0.80145200 | 1.60757900  |
| O | -0.57500700 | -0.50081700 | 2.66506100  |
| O | -2.25130200 | -1.43422200 | 1.50749800  |
| C | -4.32685400 | -2.17522000 | 2.38963200  |
| C | -2.95474400 | -1.64347900 | 2.74230300  |
| H | 0.36149700  | 0.19691500  | 0.32477800  |
| H | -4.88137500 | -2.40940000 | 3.30206800  |
| H | -4.89204600 | -1.42962000 | 1.82360300  |
| H | -4.24489900 | -3.08299800 | 1.78559300  |
| H | -2.38181100 | -2.34887600 | 3.35301500  |
| H | -3.00219200 | -0.69498900 | 3.28355500  |
| N | 2.99856500  | -3.52999800 | 0.60641000  |
| C | 2.92559100  | -2.92014200 | -0.72281100 |
| C | 2.05201100  | -1.37731000 | 1.38774000  |
| C | 0.55503200  | -3.23587700 | 0.96435500  |
| C | 1.74388000  | -4.23913400 | 0.87170800  |
| C | 3.14959900  | -2.45487900 | 1.59124900  |

|   |             |             |             |
|---|-------------|-------------|-------------|
| C | 1.62225700  | -2.08492200 | -0.86333800 |
| N | 1.01874200  | -1.92374800 | 0.47492100  |
| H | 3.80593100  | -2.28104200 | -0.84973800 |
| H | 2.96506900  | -3.70810700 | -1.48098400 |
| H | 2.45368500  | -0.47683000 | 0.91066500  |
| H | 1.56588500  | -1.08483100 | 2.31980200  |
| H | 0.21860900  | -3.09646400 | 1.99721100  |
| H | -0.30474200 | -3.53924100 | 0.35722000  |
| H | 1.84799300  | -4.80249900 | 1.80363300  |
| H | 1.58413100  | -4.95892500 | 0.06281100  |
| H | 3.08828500  | -2.89875900 | 2.58996700  |
| H | 4.14393800  | -2.00958400 | 1.48187400  |
| H | 1.81248400  | -1.08407100 | -1.26842900 |
| H | 0.88579000  | -2.59100700 | -1.49084300 |

#### N-TS4-B-1

|                                          |                             |
|------------------------------------------|-----------------------------|
| Zero-point correction=                   | 0.632990 (Hartree/Particle) |
| Thermal correction to Energy=            | 0.668871                    |
| Thermal correction to Enthalpy=          | 0.669815                    |
| Thermal correction to Gibbs Free Energy= | 0.564617                    |

E(solv) = -2178.76784910 A.U.

Imaginary Frequency 426.25i

|   |             |             |             |
|---|-------------|-------------|-------------|
| C | -3.37517500 | -0.06243000 | 0.64963100  |
| C | -3.66937800 | -1.31166100 | 0.09493500  |
| C | -4.90771600 | -1.64151900 | -0.44537700 |
| C | -5.88454500 | -0.65750600 | -0.39469000 |
| C | -5.63085200 | 0.59671900  | 0.18836900  |
| C | -4.38687700 | 0.90700600  | 0.71562600  |
| C | -1.97977100 | -0.13246200 | 1.08962100  |
| C | -1.57512000 | -1.45271900 | 0.75542500  |
| H | -5.08544800 | -2.62246700 | -0.87132700 |
| H | -6.86796200 | -0.86460600 | -0.80550300 |
| H | -6.42440100 | 1.33545500  | 0.22450400  |
| H | -4.19180400 | 1.88030000  | 1.14718300  |
| O | -2.61546600 | -2.16167800 | 0.16719500  |
| C | -0.23809700 | -2.13522100 | 0.65226400  |
| H | -0.41843400 | -3.10240100 | 0.17531800  |
| N | -1.15313600 | 0.75536400  | 1.64085300  |
| C | 0.71728500  | -2.28984800 | 1.80721100  |
| C | 0.88010800  | -1.31853900 | 2.79907900  |
| C | 1.49354200  | -3.45150300 | 1.85754100  |
| C | 1.82637100  | -1.50547200 | 3.80379400  |
| H | 0.27289500  | -0.41824300 | 2.76969200  |
| C | 2.44177500  | -3.63313600 | 2.86101100  |
| H | 1.35022300  | -4.22360300 | 1.10450900  |

|   |             |             |             |
|---|-------------|-------------|-------------|
| C | 2.61371900  | -2.65452300 | 3.83576200  |
| H | 1.94453800  | -0.74568000 | 4.57049700  |
| H | 3.03574500  | -4.54160800 | 2.88536300  |
| H | 3.34900900  | -2.79187500 | 4.62260200  |
| S | -1.28182700 | 2.35212200  | 1.38887600  |
| O | -1.42794800 | 3.05376100  | 2.65956700  |
| O | -2.18185600 | 2.69738500  | 0.28347300  |
| C | 0.37353100  | 2.70918000  | 0.79752900  |
| C | 0.57952300  | 2.93554900  | -0.55932800 |
| C | 1.43420100  | 2.76417200  | 1.69843500  |
| C | 1.86580100  | 3.22311400  | -1.01497000 |
| H | -0.27042400 | 2.89954100  | -1.23484000 |
| C | 2.71238300  | 3.04854000  | 1.22865400  |
| H | 1.24663300  | 2.60080100  | 2.75557800  |
| C | 2.94655600  | 3.28983300  | -0.13083800 |
| H | 2.02962800  | 3.41943000  | -2.07286300 |
| H | 3.54299900  | 3.09887800  | 1.92830600  |
| C | 4.32376000  | 3.66214500  | -0.62052600 |
| H | 4.45525700  | 4.74981300  | -0.61120900 |
| H | 5.10344500  | 3.23258200  | 0.01491900  |
| H | 4.49181400  | 3.32150900  | -1.64679200 |
| C | -0.06590400 | -1.09555900 | -0.39220700 |
| C | -0.76700200 | -1.33325700 | -1.69581900 |
| O | -0.75011000 | -2.37702700 | -2.30488000 |
| O | -1.43662900 | -0.24120300 | -2.06153100 |
| C | -3.30111400 | 0.79439800  | -3.09115500 |
| C | -2.34571100 | -0.37610300 | -3.16905800 |
| H | 0.09172400  | -0.07127600 | -0.07147900 |
| H | -4.01328500 | 0.74874800  | -3.91957100 |
| H | -3.85249300 | 0.77052000  | -2.14674700 |
| H | -2.75924100 | 1.74195300  | -3.14448800 |
| H | -1.76453200 | -0.38815500 | -4.09748900 |
| H | -2.85928300 | -1.33703200 | -3.07539400 |
| N | 4.20152500  | -0.67700100 | -2.10423300 |
| C | 3.81333600  | -2.08769300 | -2.20664700 |
| C | 1.79285900  | -0.19260700 | -2.41463900 |
| C | 2.67442100  | -0.34922200 | -0.17591600 |
| C | 4.13492400  | -0.26643300 | -0.69912800 |
| C | 3.24482400  | 0.13182600  | -2.86114200 |
| C | 2.43252700  | -2.33220500 | -1.52339900 |
| N | 1.84113400  | -1.02401500 | -1.19384500 |
| H | 3.77774700  | -2.35085200 | -3.26859700 |
| H | 4.59164500  | -2.69798500 | -1.73887700 |
| H | 1.25329500  | -0.76412300 | -3.17717500 |
| H | 1.21831300  | 0.71128500  | -2.18673600 |

|   |            |             |             |
|---|------------|-------------|-------------|
| H | 2.24463600 | 0.64216700  | 0.00034300  |
| H | 2.60603600 | -0.91921900 | 0.75347600  |
| H | 4.51686200 | 0.75654600  | -0.61414700 |
| H | 4.79619400 | -0.92090500 | -0.12253900 |
| H | 3.47767600 | 1.18684400  | -2.67876000 |
| H | 3.37910400 | -0.06424100 | -3.92938700 |
| H | 1.72826400 | -2.86892000 | -2.16587700 |
| H | 2.53716800 | -2.88464500 | -0.58482700 |

**N-TS4-B**

|                                          |                             |
|------------------------------------------|-----------------------------|
| Zero-point correction=                   | 0.633417 (Hartree/Particle) |
| Thermal correction to Energy=            | 0.669450                    |
| Thermal correction to Enthalpy=          | 0.670394                    |
| Thermal correction to Gibbs Free Energy= | 0.563280                    |

E(solv) = -2178.77177055 A.U.

Imaginary Frequency 472.73i

|   |             |             |             |
|---|-------------|-------------|-------------|
| C | -1.16873500 | 2.90499100  | 0.03767200  |
| C | 0.08025400  | 3.53280200  | 0.11051500  |
| C | 0.28409400  | 4.87429500  | -0.18560100 |
| C | -0.83095200 | 5.59815800  | -0.58439400 |
| C | -2.09569100 | 4.99619800  | -0.67531700 |
| C | -2.28247700 | 3.65688700  | -0.36457600 |
| C | -0.94182400 | 1.50895800  | 0.44250000  |
| C | 0.44325200  | 1.44335400  | 0.67082200  |
| H | 1.26989200  | 5.31869000  | -0.10530500 |
| H | -0.72071600 | 6.65037600  | -0.82892800 |
| H | -2.94683900 | 5.59235200  | -0.98720500 |
| H | -3.26584300 | 3.20606300  | -0.42197600 |
| O | 1.06043900  | 2.67960900  | 0.50718400  |
| C | 1.28796500  | 0.25731000  | 1.00251900  |
| H | 0.60827700  | -0.54908300 | 1.29715300  |
| N | -1.72314500 | 0.43881600  | 0.58795800  |
| C | 2.41122200  | 0.42823200  | 1.99582800  |
| C | 3.35624100  | 1.45448700  | 1.88524400  |
| C | 2.51578700  | -0.46997600 | 3.05999900  |
| C | 4.38855900  | 1.56372400  | 2.81191900  |
| H | 3.27845300  | 2.17367700  | 1.07604600  |
| C | 3.54904100  | -0.36091000 | 3.98826300  |
| H | 1.77426900  | -1.25850000 | 3.16488500  |
| C | 4.49080400  | 0.65539200  | 3.86389600  |
| H | 5.11345900  | 2.36625700  | 2.71507500  |
| H | 3.61229700  | -1.06740100 | 4.81014600  |
| H | 5.29562300  | 0.74584000  | 4.58667000  |
| S | -3.27489300 | 0.53737500  | 0.12555600  |
| O | -3.37805900 | 0.69759800  | -1.33648800 |

|   |             |             |             |
|---|-------------|-------------|-------------|
| O | -4.06526000 | 1.47737900  | 0.92918300  |
| C | -3.83578900 | -1.09974700 | 0.54123900  |
| C | -4.99333200 | -1.22738100 | 1.29624000  |
| C | -3.15913000 | -2.21788400 | 0.06039500  |
| C | -5.48331600 | -2.50111000 | 1.57374700  |
| H | -5.48636000 | -0.33304100 | 1.66300600  |
| C | -3.66161600 | -3.47978100 | 0.34921300  |
| H | -2.24080200 | -2.09400300 | -0.50668200 |
| C | -4.83065800 | -3.63994000 | 1.10190200  |
| H | -6.38700800 | -2.61055400 | 2.16822200  |
| H | -3.13842600 | -4.36181500 | -0.01286500 |
| C | -5.38344300 | -5.01574900 | 1.37435700  |
| H | -6.01681900 | -5.01996300 | 2.26540500  |
| H | -5.99342700 | -5.36331200 | 0.53279700  |
| H | -4.58151100 | -5.74504500 | 1.52087100  |
| C | 1.56819000  | 0.16500400  | -0.46187500 |
| C | 0.45201900  | -0.40814600 | -1.29031500 |
| O | -0.08273400 | -1.46177300 | -1.02549800 |
| O | 0.18379100  | 0.34942700  | -2.34421000 |
| C | -1.47143400 | 1.21684500  | -3.81846300 |
| C | -0.95914000 | -0.03564400 | -3.14785700 |
| H | 2.12202700  | 0.98799800  | -0.90905600 |
| H | -2.33705200 | 0.96619000  | -4.43726000 |
| H | -1.79757500 | 1.92646100  | -3.05465700 |
| H | -0.70468400 | 1.67644300  | -4.44862400 |
| H | -0.61947900 | -0.79437000 | -3.86224100 |
| H | -1.71998600 | -0.45834400 | -2.49129300 |
| N | 4.72206200  | -2.90149900 | -1.55405200 |
| C | 3.76615200  | -3.47318500 | -0.60173700 |
| C | 2.80024900  | -1.56846900 | -2.37060300 |
| C | 4.27976200  | -0.60341000 | -0.73253800 |
| C | 5.33931500  | -1.72084000 | -0.95153500 |
| C | 3.99812800  | -2.48240800 | -2.75382400 |
| C | 2.77620700  | -2.38418300 | -0.09606500 |
| N | 2.93138700  | -1.17888400 | -0.94389500 |
| H | 3.23315900  | -4.28571500 | -1.10489200 |
| H | 4.32095000  | -3.90788400 | 0.23494100  |
| H | 1.84657700  | -2.09135500 | -2.47702400 |
| H | 2.75906000  | -0.65265400 | -2.96948300 |
| H | 4.39688600  | 0.22031000  | -1.44516300 |
| H | 4.32341500  | -0.19266000 | 0.27773500  |
| H | 6.14440400  | -1.37005800 | -1.60416300 |
| H | 5.78811700  | -2.01966100 | 0.00076000  |
| H | 4.70069800  | -1.95845700 | -3.40954200 |
| H | 3.64588500  | -3.37131100 | -3.28522500 |

|                                          |                |             |                             |
|------------------------------------------|----------------|-------------|-----------------------------|
| H                                        | 1.73037300     | -2.69558400 | -0.15427000                 |
| H                                        | 2.99523700     | -2.08209200 | 0.93236300                  |
| <b>TS1-A</b>                             |                |             |                             |
| Zero-point correction=                   |                |             | 0.632970 (Hartree/Particle) |
| Thermal correction to Energy=            |                |             | 0.670992                    |
| Thermal correction to Enthalpy=          |                |             | 0.671936                    |
| Thermal correction to Gibbs Free Energy= |                |             | 0.559670                    |
| E(solv) =                                | -4753.08990167 | A.U.        |                             |
| Imaginary Frequency                      | 383.86i        |             |                             |
| C                                        | 0.33373300     | 3.27084700  | -0.03551600                 |
| C                                        | 1.71412700     | 3.06278300  | -0.11396600                 |
| C                                        | 2.61780100     | 4.03186100  | -0.53319500                 |
| C                                        | 2.08583100     | 5.26890900  | -0.87667300                 |
| C                                        | 0.70499400     | 5.51191200  | -0.79199900                 |
| C                                        | -0.18120000    | 4.52715900  | -0.37407600                 |
| C                                        | -0.23953000    | 2.01673500  | 0.45892700                  |
| C                                        | 0.83199400     | 1.17521400  | 0.60781500                  |
| H                                        | 3.68282400     | 3.82430400  | -0.57695700                 |
| H                                        | 2.75039200     | 6.06037800  | -1.21213000                 |
| H                                        | 0.32327800     | 6.49191500  | -1.06303900                 |
| H                                        | -1.24820600    | 4.71493700  | -0.31320900                 |
| O                                        | 2.04215600     | 1.80611100  | 0.28353200                  |
| C                                        | 0.80265200     | -0.22107800 | 1.14352400                  |
| H                                        | -0.23376000    | -0.26898100 | 1.51608900                  |
| N                                        | -1.51089300    | 1.67806800  | 0.80573200                  |
| C                                        | 1.72034400     | -0.49263300 | 2.33688500                  |
| C                                        | 2.41186400     | 0.54825300  | 2.96370600                  |
| C                                        | 1.86023500     | -1.78737900 | 2.85488800                  |
| C                                        | 3.24971000     | 0.29844600  | 4.04802500                  |
| H                                        | 2.29710500     | 1.56126100  | 2.59528800                  |
| C                                        | 2.70149400     | -2.03507100 | 3.93614500                  |
| H                                        | 1.26700200     | -2.59927900 | 2.44256500                  |
| C                                        | 3.41051800     | -0.99581500 | 4.53227800                  |
| H                                        | 3.77881100     | 1.12480000  | 4.51466000                  |
| H                                        | 2.79011700     | -3.04712600 | 4.32160100                  |
| H                                        | 4.06819800     | -1.19111900 | 5.37470800                  |
| S                                        | -2.73263500    | 2.35711800  | 0.04960600                  |
| O                                        | -2.45324000    | 2.67120300  | -1.36407800                 |
| O                                        | -3.37650500    | 3.45785000  | 0.79446600                  |
| C                                        | -3.92589800    | 1.01653700  | 0.07880000                  |
| C                                        | -5.27871200    | 1.32252200  | -0.01454700                 |
| C                                        | -3.50736600    | -0.30802400 | 0.14020800                  |
| C                                        | -6.21257800    | 0.28991100  | -0.06036800                 |
| H                                        | -5.58614400    | 2.36381200  | -0.03314800                 |



|    |             |             |             |
|----|-------------|-------------|-------------|
| C  | -4.44747700 | -1.33066300 | 0.10821200  |
| H  | -2.45218500 | -0.52851700 | 0.24330800  |
| C  | -5.81215400 | -1.04678000 | 0.00206800  |
| H  | -7.27280100 | 0.52472900  | -0.13429900 |
| H  | -4.09833300 | -2.35932500 | 0.18727400  |
| C  | -6.82753300 | -2.16285800 | -0.00709400 |
| H  | -6.95949300 | -2.58611000 | 0.99558600  |
| H  | -7.80473800 | -1.80941900 | -0.34984600 |
| H  | -6.51191000 | -2.98044200 | -0.66341600 |
| C  | 0.85462900  | -1.36519800 | 0.12286100  |
| C  | 0.00943900  | -1.29994400 | -1.11788900 |
| O  | -0.62875100 | -0.34441400 | -1.46537400 |
| O  | 0.07353800  | -2.45334600 | -1.82239200 |
| C  | -1.29500500 | -4.25258300 | -2.51767600 |
| C  | -1.10606200 | -2.75170100 | -2.58503100 |
| H  | 1.37424200  | -2.28681300 | 0.32923200  |
| H  | -2.20187000 | -4.54724100 | -3.05407100 |
| H  | -0.44169100 | -4.77744800 | -2.95832600 |
| H  | -1.38377800 | -4.53601600 | -1.46540900 |
| H  | -1.95059200 | -2.22214400 | -2.13453700 |
| H  | -0.97594800 | -2.38251100 | -3.60787500 |
| N  | 2.68131700  | -1.00265300 | -1.00849700 |
| C  | 3.79013700  | -0.58208800 | -0.11789800 |
| C  | 3.88001900  | 0.25291900  | -2.75452600 |
| C  | 4.27005900  | -2.08695800 | -2.55699500 |
| C  | 3.07231600  | -2.30813600 | -1.58940000 |
| C  | 2.49611600  | -0.04266800 | -2.12199100 |
| C  | 5.12288200  | -0.60599200 | -0.91998300 |
| N  | 4.86175500  | -0.76340300 | -2.35293000 |
| H  | 3.56412400  | 0.41190100  | 0.25909500  |
| H  | 3.81255100  | -1.27123700 | 0.73231300  |
| H  | 4.25444200  | 1.22844600  | -2.42644800 |
| H  | 3.81324100  | 0.27149100  | -3.84746100 |
| H  | 3.94381000  | -2.15360200 | -3.60065000 |
| H  | 5.04248900  | -2.84783500 | -2.40162000 |
| H  | 2.20948400  | -2.74144800 | -2.09555200 |
| H  | 3.34500700  | -2.96504900 | -0.75575200 |
| H  | 1.82117200  | -0.52037700 | -2.83950200 |
| H  | 2.00292300  | 0.85440000  | -1.74761400 |
| H  | 5.67920800  | 0.32419200  | -0.76523900 |
| H  | 5.76587900  | -1.43474000 | -0.60264000 |
| Br | -1.05342300 | -2.78307500 | 1.01002400  |

**TS1-B**

Zero-point correction=

0.633710 (Hartree/Particle)

|                                          |                |             |             |
|------------------------------------------|----------------|-------------|-------------|
| Thermal correction to Energy=            |                |             | 0.671651    |
| Thermal correction to Enthalpy=          |                |             | 0.672595    |
| Thermal correction to Gibbs Free Energy= |                |             | 0.560588    |
| E(solv) =                                | -4753.08133386 | A.U.        |             |
| Imaginary Frequency                      | 386.71i        |             |             |
| C                                        | -0.83867500    | 3.37330400  | -0.42532300 |
| C                                        | 0.50118500     | 3.72826200  | -0.25376600 |
| C                                        | 0.91995100     | 5.00157000  | 0.11348600  |
| C                                        | -0.07732900    | 5.94932600  | 0.30662800  |
| C                                        | -1.43273900    | 5.62293000  | 0.13272800  |
| C                                        | -1.83034700    | 4.34327900  | -0.23200900 |
| C                                        | -0.84402400    | 1.95869500  | -0.80101500 |
| C                                        | 0.47746300     | 1.59796400  | -0.82480800 |
| H                                        | 1.97397600     | 5.22825200  | 0.23407700  |
| H                                        | 0.19739400     | 6.96081900  | 0.59290500  |
| H                                        | -2.18596100    | 6.38999900  | 0.28724400  |
| H                                        | -2.87853100    | 4.09413600  | -0.36875700 |
| O                                        | 1.30796300     | 2.67272800  | -0.50340700 |
| C                                        | 1.33067200     | 0.40478100  | -1.17028400 |
| H                                        | 2.08540900     | 0.86203300  | -1.81773400 |
| N                                        | -1.92368100    | 1.13584800  | -1.05294400 |
| C                                        | 0.76482700     | -0.73116200 | -2.00952400 |
| C                                        | -0.44301400    | -1.38474400 | -1.76821000 |
| C                                        | 1.56385300     | -1.16989400 | -3.07088600 |
| C                                        | -0.83615500    | -2.45640800 | -2.56860300 |
| H                                        | -1.10811900    | -1.02890900 | -0.99093300 |
| C                                        | 1.16932000     | -2.23334900 | -3.87327300 |
| H                                        | 2.53063300     | -0.69629700 | -3.22817300 |
| C                                        | -0.03539600    | -2.88442600 | -3.62213400 |
| H                                        | -1.78293900    | -2.94859000 | -2.36260500 |
| H                                        | 1.80878200     | -2.55838400 | -4.68913800 |
| H                                        | -0.34789800    | -3.71883900 | -4.24434300 |
| S                                        | -3.24329300    | 1.35281400  | -0.20327800 |
| O                                        | -4.27386200    | 2.19245400  | -0.84141600 |
| O                                        | -3.00119800    | 1.66036200  | 1.22712000  |
| C                                        | -3.89340300    | -0.31956700 | -0.22947500 |
| C                                        | -4.42001200    | -0.84596500 | 0.94271900  |
| C                                        | -3.89679900    | -1.07252400 | -1.40410100 |
| C                                        | -4.94709500    | -2.13734100 | 0.94485900  |
| H                                        | -4.40834400    | -0.23473100 | 1.84017600  |
| C                                        | -4.42904100    | -2.35555900 | -1.38906500 |
| H                                        | -3.45510300    | -0.65302900 | -2.30362000 |
| C                                        | -4.96135500    | -2.90756400 | -0.21690800 |
| H                                        | -5.35386000    | -2.55108300 | 1.86504500  |
| H                                        | -4.43005300    | -2.94687900 | -2.30314300 |

|    |             |             |             |
|----|-------------|-------------|-------------|
| C  | -5.54039600 | -4.30021500 | -0.22571000 |
| H  | -4.82580800 | -5.02506700 | -0.62962300 |
| H  | -5.81390500 | -4.62134100 | 0.78322400  |
| H  | -6.44072700 | -4.34920200 | -0.84856500 |
| C  | 2.21407400  | -0.03182800 | 0.01223200  |
| C  | 2.83254500  | -1.39205800 | 0.14269700  |
| O  | 2.56619400  | -2.36453100 | -0.51561400 |
| O  | 3.69898600  | -1.42199000 | 1.18198200  |
| C  | 5.96063900  | -1.80433500 | 1.73969800  |
| C  | 4.73950300  | -2.39804900 | 1.06921800  |
| H  | 2.53927000  | 0.73330700  | 0.70395200  |
| H  | 6.80945100  | -2.49128700 | 1.66989500  |
| H  | 6.20637100  | -0.86834000 | 1.23085600  |
| H  | 5.76567000  | -1.59485900 | 2.79568200  |
| H  | 4.41168800  | -3.33574200 | 1.53274800  |
| H  | 4.92269500  | -2.58314400 | 0.00727300  |
| N  | 0.80922500  | -0.60631300 | 1.66936900  |
| C  | 0.50441500  | -2.05652000 | 1.65598200  |
| C  | -1.23134800 | -0.12850400 | 3.00175900  |
| C  | 0.72107300  | -0.87499700 | 4.12450300  |
| C  | 1.51782200  | -0.27973700 | 2.92734700  |
| C  | -0.46624700 | 0.15351200  | 1.68151800  |
| C  | -0.53112200 | -2.37355400 | 2.76709300  |
| N  | -0.62939100 | -1.26103900 | 3.71499000  |
| H  | 0.14949000  | -2.32559100 | 0.65758400  |
| H  | 1.44217100  | -2.59227100 | 1.83002500  |
| H  | -2.27814600 | -0.34876700 | 2.78338400  |
| H  | -1.21219000 | 0.74665600  | 3.65883600  |
| H  | 0.64740900  | -0.14497800 | 4.93761900  |
| H  | 1.22403800  | -1.76514500 | 4.52043000  |
| H  | 1.57268900  | 0.81251400  | 2.98625500  |
| H  | 2.53296700  | -0.67475600 | 2.87741200  |
| H  | -0.24331300 | 1.21489300  | 1.57727000  |
| H  | -1.05114000 | -0.13949500 | 0.81000600  |
| H  | -1.52645900 | -2.53288800 | 2.33830800  |
| H  | -0.24618600 | -3.28346000 | 3.30761900  |
| Br | 4.48875600  | 0.41605300  | -1.09606400 |

### TS2-A-1

|                                          |                             |
|------------------------------------------|-----------------------------|
| Zero-point correction=                   | 0.443183 (Hartree/Particle) |
| Thermal correction to Energy=            | 0.473994                    |
| Thermal correction to Enthalpy=          | 0.474938                    |
| Thermal correction to Gibbs Free Energy= | 0.378744                    |

E(solv) = -4407.81538612 A.U.

Imaginary Frequency 457.22i

|    |             |             |             |
|----|-------------|-------------|-------------|
| C  | 2.48585400  | -2.08460100 | 0.18809500  |
| C  | 3.66502100  | -1.43163600 | 0.56958700  |
| C  | 4.90472100  | -2.06073500 | 0.59879500  |
| C  | 4.93457700  | -3.39677800 | 0.22401700  |
| C  | 3.76799600  | -4.07401300 | -0.16674300 |
| C  | 2.53827700  | -3.43203300 | -0.19094400 |
| C  | 1.42047200  | -1.08364500 | 0.29599400  |
| C  | 2.09306500  | 0.10161300  | 0.69344200  |
| H  | 5.79429300  | -1.51778400 | 0.89768300  |
| H  | 5.88232400  | -3.92763300 | 0.23055200  |
| H  | 3.83077500  | -5.11750800 | -0.45809500 |
| H  | 1.64107800  | -3.95820300 | -0.49479900 |
| O  | 3.45332200  | -0.13990800 | 0.90526600  |
| C  | 1.57255300  | 1.44832100  | 1.07871000  |
| H  | 2.32298800  | 1.97352600  | 1.67539700  |
| N  | 0.11040100  | -1.11252300 | 0.10460300  |
| C  | 0.21320800  | 1.53049900  | 1.72980800  |
| C  | -0.07684400 | 0.65190700  | 2.77537500  |
| C  | -0.71307200 | 2.51534700  | 1.38398300  |
| C  | -1.27307400 | 0.75646300  | 3.47967300  |
| H  | 0.63786100  | -0.12832700 | 3.02678100  |
| C  | -1.91896700 | 2.60318000  | 2.07626200  |
| H  | -0.47517300 | 3.20486000  | 0.57952000  |
| C  | -2.20310400 | 1.73223200  | 3.12587300  |
| H  | -1.48420800 | 0.06499600  | 4.29091000  |
| H  | -2.63886800 | 3.36626800  | 1.79373200  |
| H  | -3.14243700 | 1.81367700  | 3.66696600  |
| S  | -0.65129400 | -2.47829700 | -0.31377300 |
| O  | -0.52047300 | -3.52107800 | 0.71282900  |
| O  | -0.39182600 | -2.89689000 | -1.69837800 |
| C  | -2.32572100 | -1.86397200 | -0.26496000 |
| C  | -2.76322600 | -1.13757100 | 0.84000500  |
| C  | -3.18249500 | -2.15456100 | -1.31686800 |
| C  | -4.08031800 | -0.70152200 | 0.88312400  |
| H  | -2.06437400 | -0.88714500 | 1.63221400  |
| C  | -4.50263900 | -1.71012800 | -1.25812400 |
| H  | -2.80304900 | -2.70797900 | -2.17017900 |
| C  | -4.96668600 | -0.97895600 | -0.16457800 |
| H  | -4.41882100 | -0.11507000 | 1.73451700  |
| H  | -5.17972200 | -1.92600000 | -2.08135800 |
| C  | -6.37976300 | -0.45419500 | -0.12662600 |
| H  | -6.40650100 | 0.60855900  | -0.39318800 |
| H  | -7.02220100 | -0.98994200 | -0.83100000 |
| H  | -6.81273600 | -0.55138400 | 0.87364800  |
| Br | 1.60897800  | 4.16061800  | -0.82158700 |

|   |             |             |             |
|---|-------------|-------------|-------------|
| C | 1.85579600  | 1.64788000  | -0.35239300 |
| C | 0.99568100  | 1.27369100  | -1.52230100 |
| O | 1.46448500  | 0.86570800  | -2.55705900 |
| O | -0.30550700 | 1.41538000  | -1.28405700 |
| C | -2.57716800 | 1.31523400  | -1.91549600 |
| C | -1.17033100 | 0.91829300  | -2.30718400 |
| H | 2.88742000  | 1.82477600  | -0.61734800 |
| H | -3.29837800 | 0.91613300  | -2.63539000 |
| H | -2.81606000 | 0.91917600  | -0.92499300 |
| H | -2.66802200 | 2.40521500  | -1.88649800 |
| H | -0.86965200 | 1.35049700  | -3.26623000 |
| H | -1.04577900 | -0.16947700 | -2.36711700 |

### TS2-A

|                                          |                             |
|------------------------------------------|-----------------------------|
| Zero-point correction=                   | 0.443612 (Hartree/Particle) |
| Thermal correction to Energy=            | 0.474833                    |
| Thermal correction to Enthalpy=          | 0.475777                    |
| Thermal correction to Gibbs Free Energy= | 0.376087                    |

E(solv) = -4407.80890505 A.U.

Imaginary Frequency 395.56i

|   |             |             |             |
|---|-------------|-------------|-------------|
| C | 0.23658200  | 2.97696400  | 0.05437300  |
| C | 1.62938600  | 2.89825600  | -0.09040700 |
| C | 2.41277800  | 3.98141200  | -0.46972000 |
| C | 1.75047600  | 5.18000100  | -0.69956700 |
| C | 0.35766900  | 5.28768300  | -0.55359400 |
| C | -0.41167500 | 4.19562800  | -0.17888300 |
| C | -0.18809300 | 1.64705600  | 0.48566400  |
| C | 1.00595900  | 0.88977400  | 0.51257500  |
| H | 3.48695500  | 3.87771500  | -0.57685700 |
| H | 2.32402900  | 6.05249700  | -0.99946600 |
| H | -0.12454700 | 6.24132700  | -0.74367100 |
| H | -1.48952800 | 4.26657100  | -0.08568000 |
| O | 2.11659000  | 1.66391700  | 0.19801800  |
| C | 1.08884900  | -0.54878200 | 0.88895100  |
| H | 0.23037800  | -0.79272700 | 1.52333200  |
| N | -1.33565700 | 1.06477800  | 0.80534700  |
| C | 2.37791900  | -1.08651300 | 1.45824300  |
| C | 3.17364700  | -0.27052100 | 2.26266100  |
| C | 2.75683400  | -2.41503000 | 1.24621400  |
| C | 4.34007800  | -0.76789400 | 2.84109600  |
| H | 2.88527700  | 0.76353800  | 2.42594400  |
| C | 3.92079700  | -2.90766200 | 1.82609400  |
| H | 2.13817200  | -3.04443800 | 0.61253400  |
| C | 4.71962400  | -2.08783600 | 2.62266600  |
| H | 4.95224000  | -0.11865900 | 3.46121500  |

|    |             |             |             |
|----|-------------|-------------|-------------|
| H  | 4.20713700  | -3.94110800 | 1.65019400  |
| H  | 5.63060900  | -2.47706000 | 3.06932400  |
| S  | -2.76783600 | 1.72935100  | 0.45407400  |
| O  | -2.77130200 | 2.37464600  | -0.86572500 |
| O  | -3.31135100 | 2.52935300  | 1.55811200  |
| C  | -3.76191700 | 0.24510700  | 0.35232700  |
| C  | -3.22493000 | -0.97767700 | -0.04335300 |
| C  | -5.12012000 | 0.36546100  | 0.62584200  |
| C  | -4.06074700 | -2.07946800 | -0.17343700 |
| H  | -2.16265100 | -1.10173900 | -0.22122200 |
| C  | -5.94613600 | -0.74611000 | 0.48662800  |
| H  | -5.51231700 | 1.31973700  | 0.96394000  |
| C  | -5.43095400 | -1.97932000 | 0.08210100  |
| H  | -3.61982200 | -3.02770400 | -0.47304300 |
| H  | -7.00791900 | -0.65687600 | 0.70542000  |
| C  | -6.32871500 | -3.17927600 | -0.08545400 |
| H  | -7.30024300 | -3.02003900 | 0.39130200  |
| H  | -6.50748400 | -3.38951400 | -1.14607600 |
| H  | -5.87564200 | -4.07482400 | 0.35077900  |
| Br | -0.00233000 | -3.06760700 | -0.93955100 |
| C  | 0.69382900  | -0.68056000 | -0.53362500 |
| C  | 1.65697000  | -0.58353100 | -1.67135800 |
| O  | 1.35525000  | -0.29798800 | -2.80264900 |
| O  | 2.91499400  | -0.80564000 | -1.26563400 |
| C  | 5.25052700  | -0.79291000 | -1.50925000 |
| C  | 3.93500100  | -0.62614400 | -2.24196800 |
| H  | -0.33321100 | -0.47431800 | -0.78690100 |
| H  | 6.09324000  | -0.65923200 | -2.19424600 |
| H  | 5.32262600  | -0.05710600 | -0.70344500 |
| H  | 5.30960700  | -1.78782300 | -1.05976800 |
| H  | 3.80339800  | -1.36600000 | -3.03850800 |
| H  | 3.83094900  | 0.36802300  | -2.68934600 |

### TS2-B-1

|                                          |                             |
|------------------------------------------|-----------------------------|
| Zero-point correction=                   | 0.443620 (Hartree/Particle) |
| Thermal correction to Energy=            | 0.474362                    |
| Thermal correction to Enthalpy=          | 0.475306                    |
| Thermal correction to Gibbs Free Energy= | 0.378764                    |

E(solv) = -4407.81475738 A.U.

Imaginary Frequency 339.79i

|   |             |            |             |
|---|-------------|------------|-------------|
| C | -1.05034300 | 2.81643700 | 0.21399300  |
| C | -2.29106800 | 2.67232300 | 0.84928700  |
| C | -3.19279600 | 3.72007700 | 0.99911800  |
| C | -2.80959500 | 4.95031200 | 0.48324600  |
| C | -1.57305800 | 5.12110700 | -0.16111200 |

|    |             |             |             |
|----|-------------|-------------|-------------|
| C  | -0.68524200 | 4.06486300  | -0.30572300 |
| C  | -0.42448900 | 1.49247000  | 0.26391800  |
| C  | -1.37345900 | 0.68364400  | 0.92757700  |
| H  | -4.14464300 | 3.56363100  | 1.49420100  |
| H  | -3.48294800 | 5.79771100  | 0.57828100  |
| H  | -1.30875400 | 6.09768500  | -0.55446400 |
| H  | 0.26700300  | 4.19865300  | -0.80585800 |
| O  | -2.49743100 | 1.41301600  | 1.29662200  |
| C  | -1.24218100 | -0.73112400 | 1.38409200  |
| H  | -2.07519300 | -0.97726600 | 2.04900800  |
| N  | 0.72981300  | 0.99616000  | -0.16903900 |
| C  | 0.10134600  | -1.11297200 | 1.96663200  |
| C  | 0.67911100  | -0.25351900 | 2.90575400  |
| C  | 0.76076100  | -2.29680100 | 1.63678700  |
| C  | 1.88153900  | -0.57572500 | 3.52357100  |
| H  | 0.18540900  | 0.68798700  | 3.13453400  |
| C  | 1.96991600  | -2.61701100 | 2.25491800  |
| H  | 0.32277700  | -2.96520000 | 0.90258300  |
| C  | 2.53256000  | -1.76634000 | 3.20189400  |
| H  | 2.31800700  | 0.11058500  | 4.24339900  |
| H  | 2.47392100  | -3.54180100 | 1.98667200  |
| H  | 3.47620600  | -2.01968600 | 3.67779900  |
| S  | 1.87321100  | 1.97411900  | -0.76341900 |
| O  | 2.29008300  | 2.98732500  | 0.21652700  |
| O  | 1.58546700  | 2.48066500  | -2.11355300 |
| C  | 3.18430900  | 0.77678200  | -0.92669700 |
| C  | 3.38776100  | -0.17527700 | 0.06986700  |
| C  | 4.01827400  | 0.84560600  | -2.03317700 |
| C  | 4.44148700  | -1.06895600 | -0.05740900 |
| H  | 2.70648300  | -0.22466800 | 0.91400200  |
| C  | 5.07651400  | -0.05481400 | -2.14214400 |
| H  | 3.81825500  | 1.58588400  | -2.80139600 |
| C  | 5.29972200  | -1.02177700 | -1.16227800 |
| H  | 4.59062200  | -1.82448400 | 0.71135600  |
| H  | 5.73049200  | -0.01380700 | -3.01007000 |
| C  | 6.42415200  | -2.01827600 | -1.29470500 |
| H  | 7.04649700  | -2.03577100 | -0.39390300 |
| H  | 6.03430200  | -3.03166600 | -1.44103900 |
| H  | 7.06683900  | -1.78001700 | -2.14686900 |
| Br | -1.82501100 | -3.46832800 | -0.43860900 |
| C  | -1.61011900 | -1.01395800 | -0.01468300 |
| C  | -3.05677700 | -0.92803300 | -0.37117600 |
| O  | -3.96303300 | -0.91575000 | 0.42720500  |
| O  | -3.21229300 | -0.81690200 | -1.70049300 |
| C  | -4.92718300 | -2.45897800 | -2.17102400 |

|   |             |             |             |
|---|-------------|-------------|-------------|
| C | -4.55020100 | -0.98743500 | -2.17062700 |
| H | -0.86185300 | -0.91020700 | -0.79154700 |
| H | -5.92793800 | -2.59129900 | -2.59596000 |
| H | -4.20349100 | -3.03270600 | -2.75504300 |
| H | -4.91261700 | -2.85045100 | -1.15115300 |
| H | -5.22862000 | -0.40168500 | -1.54417000 |
| H | -4.54345000 | -0.57156900 | -3.18091900 |

**TS2-B**

|                                          |                             |
|------------------------------------------|-----------------------------|
| Zero-point correction=                   | 0.444001 (Hartree/Particle) |
| Thermal correction to Energy=            | 0.474694                    |
| Thermal correction to Enthalpy=          | 0.475638                    |
| Thermal correction to Gibbs Free Energy= | 0.379639                    |

E(solv) = -4407.81154498 A.U.

Imaginary Frequency 382.40i

|   |             |             |             |
|---|-------------|-------------|-------------|
| C | -0.20928100 | 2.69786700  | -0.05361800 |
| C | -1.60119700 | 2.85516200  | -0.05570700 |
| C | -2.23300000 | 4.06702900  | 0.19945000  |
| C | -1.41285200 | 5.15192000  | 0.47472300  |
| C | -0.01496400 | 5.02377100  | 0.48808900  |
| C | 0.60033300  | 3.80850500  | 0.22283700  |
| C | 0.03270700  | 1.28772400  | -0.38981600 |
| C | -1.26417600 | 0.72574800  | -0.47586000 |
| H | -3.31475700 | 4.13903700  | 0.18522300  |
| H | -1.86331500 | 6.11818400  | 0.68403800  |
| H | 0.59671200  | 5.89293100  | 0.70859800  |
| H | 1.68019200  | 3.72165400  | 0.22083200  |
| O | -2.24887800 | 1.70522000  | -0.33979800 |
| C | -1.73515400 | -0.66618200 | -0.74485200 |
| H | -0.90215800 | -1.26979000 | -1.11811400 |
| N | 1.12844300  | 0.56696000  | -0.60111200 |
| C | -2.97820700 | -0.77184500 | -1.59259200 |
| C | -3.00708400 | -0.06126700 | -2.79606500 |
| C | -4.06835800 | -1.56656600 | -1.24150300 |
| C | -4.10384000 | -0.14715000 | -3.64454000 |
| H | -2.15981900 | 0.56858800  | -3.05737100 |
| C | -5.16991500 | -1.64634300 | -2.09370300 |
| H | -4.04683300 | -2.11777400 | -0.30560000 |
| C | -5.19314400 | -0.94311500 | -3.29348700 |
| H | -4.11203900 | 0.41277900  | -4.57553600 |
| H | -6.01625500 | -2.26604100 | -1.81056400 |
| H | -6.05569100 | -1.00873500 | -3.95120500 |
| S | 2.57846700  | 1.18759600  | -0.24258700 |
| O | 2.72588100  | 1.41807300  | 1.20496700  |
| O | 2.97545800  | 2.31102600  | -1.10614700 |



|    |             |             |             |
|----|-------------|-------------|-------------|
| C  | 3.61798800  | -0.18636600 | -0.69918400 |
| C  | 3.29249000  | -1.48372300 | -0.30682200 |
| C  | 4.78651500  | 0.08455100  | -1.39701800 |
| C  | 4.16523200  | -2.51500000 | -0.62932600 |
| H  | 2.35829200  | -1.67576400 | 0.21553800  |
| C  | 5.65053900  | -0.96350400 | -1.70770200 |
| H  | 4.99695600  | 1.10557100  | -1.69838600 |
| C  | 5.35254000  | -2.27187300 | -1.32968000 |
| H  | 3.91715600  | -3.53304900 | -0.33747600 |
| H  | 6.56691300  | -0.76072700 | -2.25715400 |
| C  | 6.27531600  | -3.41272500 | -1.67844300 |
| H  | 6.53508600  | -3.99667200 | -0.78934400 |
| H  | 5.80225000  | -4.09829100 | -2.39022600 |
| H  | 7.20346700  | -3.04923800 | -2.12833600 |
| Br | -2.77095900 | -2.71929400 | 1.84846500  |
| C  | -1.74132400 | -0.67474600 | 0.73143700  |
| C  | -0.45516100 | -1.02442300 | 1.40980400  |
| O  | 0.34663000  | -1.81420200 | 0.97384400  |
| O  | -0.27779200 | -0.28241000 | 2.50602900  |
| C  | 1.18682600  | 0.77156200  | 4.04070600  |
| C  | 0.97931900  | -0.45118500 | 3.17524300  |
| H  | -2.49302400 | -0.12438500 | 1.27777700  |
| H  | 2.12794000  | 0.68053700  | 4.59119300  |
| H  | 1.24723700  | 1.65626100  | 3.40247500  |
| H  | 0.36825400  | 0.89126600  | 4.75645300  |
| H  | 0.93706600  | -1.37948800 | 3.75601700  |
| H  | 1.77208600  | -0.53040500 | 2.42867900  |

### TS3-A-1-A

Zero-point correction= 0.734501 (Hartree/Particle)

Thermal correction to Energy= 0.777172

Thermal correction to Enthalpy= 0.778116

Thermal correction to Gibbs Free Energy= 0.656586

E(solv) = -2485.21124463 A.U.

Imaginary Frequency 482.66i

|   |             |            |             |
|---|-------------|------------|-------------|
| C | 1.08885200  | 3.38492100 | -0.29003600 |
| C | -0.00538500 | 3.93726100 | 0.38289000  |
| C | -0.42402500 | 5.25235300 | 0.22585500  |
| C | 0.29416000  | 6.02762900 | -0.67322600 |
| C | 1.38280100  | 5.49721800 | -1.38325200 |
| C | 1.79149500  | 4.18393900 | -1.20473100 |
| C | 1.17402100  | 1.98401200 | 0.15150600  |
| C | 0.08267200  | 1.83817000 | 1.04915900  |
| H | -1.27244200 | 5.63546200 | 0.78144600  |
| H | 0.00500500  | 7.06200200 | -0.83272900 |

|   |             |             |             |
|---|-------------|-------------|-------------|
| H | 1.91828900  | 6.12819900  | -2.08462500 |
| H | 2.63835600  | 3.79397600  | -1.75409700 |
| O | -0.60892800 | 3.03712900  | 1.19640000  |
| C | -0.57472900 | 0.70299500  | 1.77057900  |
| H | -1.30773600 | 1.12789800  | 2.46025400  |
| N | 1.99956500  | 0.98369200  | -0.15499700 |
| C | 0.23922500  | -0.36386500 | 2.46627200  |
| C | 1.62441000  | -0.26912700 | 2.59128900  |
| C | -0.42452500 | -1.44440800 | 3.05592700  |
| C | 2.34016300  | -1.26939500 | 3.24695000  |
| H | 2.14366900  | 0.57793100  | 2.16052400  |
| C | 0.29313700  | -2.44344000 | 3.70540700  |
| H | -1.50990600 | -1.47265100 | 3.03959100  |
| C | 1.68169200  | -2.36692500 | 3.79184300  |
| H | 3.42035400  | -1.18676900 | 3.32922100  |
| H | -0.23570600 | -3.27598700 | 4.16052300  |
| H | 2.24255100  | -3.14659800 | 4.29855700  |
| S | 3.29661600  | 1.25007900  | -1.09926900 |
| O | 4.11565400  | 2.36134400  | -0.60518800 |
| O | 2.95903800  | 1.24118600  | -2.52685000 |
| C | 4.20916800  | -0.24709800 | -0.77310700 |
| C | 4.69436600  | -0.48492800 | 0.51155000  |
| C | 4.47666400  | -1.12531400 | -1.81232400 |
| C | 5.42757800  | -1.63731500 | 0.75534500  |
| H | 4.49986600  | 0.23571800  | 1.30077400  |
| C | 5.22353200  | -2.27484400 | -1.55421100 |
| H | 4.10354500  | -0.89636800 | -2.80594000 |
| C | 5.69737500  | -2.55123000 | -0.27231500 |
| H | 5.80748200  | -1.83398200 | 1.75528300  |
| H | 5.44108600  | -2.96716900 | -2.36375500 |
| C | 6.47813700  | -3.80805800 | 0.01578200  |
| H | 7.37815700  | -3.58924100 | 0.59825500  |
| H | 5.87692800  | -4.51610600 | 0.59677900  |
| H | 6.78322300  | -4.30660000 | -0.90766600 |
| C | -1.21088200 | 0.47617200  | 0.43665000  |
| C | -0.52318800 | -0.27004800 | -0.65596000 |
| O | -0.65635000 | -0.01036400 | -1.83493400 |
| O | 0.15977600  | -1.30765300 | -0.19140000 |
| C | 1.93707900  | -2.85186500 | -0.26572800 |
| C | 1.04564700  | -1.96804800 | -1.10849800 |
| H | -1.91728300 | 1.22914100  | 0.10728000  |
| H | 2.62943400  | -3.40881000 | -0.90234900 |
| H | 2.51472100  | -2.23431900 | 0.42776700  |
| H | 1.33739600  | -3.55715200 | 0.31789800  |
| H | 0.44659500  | -2.54553300 | -1.82525000 |

|   |             |             |             |
|---|-------------|-------------|-------------|
| H | 1.60074600  | -1.20554900 | -1.66156200 |
| C | -3.65279300 | -0.26471800 | 1.49580800  |
| O | -3.38745400 | -0.14283600 | 2.67854900  |
| O | -4.66080600 | 0.45420000  | 0.92105100  |
| C | -2.86043200 | -1.04146600 | 0.56546000  |
| C | -5.33883500 | 1.36682200  | 1.79887900  |
| C | -6.40036600 | 2.06741500  | 0.97839700  |
| H | -4.60675300 | 2.06770600  | 2.20923900  |
| H | -5.76543500 | 0.80632200  | 2.63530300  |
| H | -6.94743900 | 2.77841400  | 1.60269200  |
| H | -5.94721900 | 2.61598000  | 0.14828800  |
| H | -7.11557100 | 1.34671800  | 0.57149900  |
| H | -2.31613200 | -1.85156000 | 1.03810900  |
| C | -2.59664000 | -2.54277600 | -1.35534600 |
| C | -4.82541100 | -2.24256000 | -0.40936900 |
| C | -3.78194600 | -0.43870200 | -1.70810300 |
| C | -3.37266200 | -3.26487600 | -2.47980600 |
| H | -2.24034900 | -3.22093400 | -0.57726300 |
| H | -1.75659900 | -1.97506600 | -1.75203000 |
| C | -5.51637100 | -2.57519500 | -1.75329400 |
| H | -5.42070600 | -1.57619300 | 0.21207300  |
| H | -4.56286600 | -3.13353200 | 0.16699400  |
| H | -4.57959200 | 0.17256600  | -1.29035700 |
| H | -2.86799500 | 0.14951600  | -1.79198900 |
| C | -4.17022100 | -1.10363400 | -3.04992000 |
| H | -3.69140300 | -4.26345100 | -2.16587200 |
| H | -2.72554500 | -3.38045500 | -3.35335800 |
| H | -6.32848600 | -1.87092700 | -1.95618800 |
| H | -5.94788100 | -3.57949600 | -1.71440500 |
| H | -5.00104900 | -0.56001100 | -3.50774600 |
| H | -3.32857600 | -1.07798000 | -3.74815300 |
| N | -3.51444600 | -1.53526200 | -0.69112500 |
| N | -4.56091900 | -2.50198300 | -2.85582800 |

### TS3-A-1

Zero-point correction= 0.734489 (Hartree/Particle)

Thermal correction to Energy= 0.777016

Thermal correction to Enthalpy= 0.777960

Thermal correction to Gibbs Free Energy= 0.658094

E(solv) = -2485.20843784 A.U.

Imaginary Frequency 499.51i

|   |             |            |             |
|---|-------------|------------|-------------|
| C | 1.09940800  | 3.44226200 | -0.26052300 |
| C | -0.12635700 | 3.93060200 | 0.20520100  |
| C | -0.57019200 | 5.22337400 | -0.03655700 |
| C | 0.27211900  | 6.04044900 | -0.78082100 |

|   |             |             |             |
|---|-------------|-------------|-------------|
| C | 1.50761400  | 5.57736500  | -1.25773500 |
| C | 1.93693500  | 4.28214900  | -1.00386600 |
| C | 1.19563000  | 2.05858100  | 0.22393500  |
| C | -0.04515200 | 1.83586000  | 0.88086400  |
| H | -1.52575800 | 5.56697800  | 0.34347900  |
| H | -0.03343600 | 7.06013400  | -0.99560800 |
| H | 2.13905900  | 6.24440300  | -1.83500100 |
| H | 2.89401500  | 3.93005000  | -1.37075500 |
| O | -0.81446700 | 2.99962200  | 0.92118600  |
| C | -0.57274600 | 0.66266200  | 1.62351300  |
| H | -1.29529500 | 1.01377400  | 2.37124400  |
| N | 2.13140700  | 1.13447400  | 0.18259600  |
| C | 0.42053100  | -0.26529400 | 2.28431900  |
| C | 1.30149500  | 0.29685400  | 3.21238100  |
| C | 0.44065400  | -1.64076000 | 2.06743000  |
| C | 2.18387500  | -0.50466000 | 3.92686100  |
| H | 1.30291200  | 1.37467800  | 3.35867700  |
| C | 1.33589700  | -2.44194300 | 2.77634400  |
| H | -0.21687500 | -2.09365100 | 1.33164300  |
| C | 2.20185000  | -1.88266400 | 3.71063200  |
| H | 2.86523400  | -0.05399400 | 4.64229200  |
| H | 1.35160700  | -3.51179100 | 2.58909400  |
| H | 2.89212400  | -2.51261000 | 4.26481100  |
| S | 3.48852600  | 1.33893000  | -0.68934300 |
| O | 4.38137700  | 2.33260100  | -0.08766100 |
| O | 3.21117800  | 1.48566700  | -2.12523200 |
| C | 4.18072700  | -0.28542300 | -0.45751000 |
| C | 4.11852800  | -0.90319700 | 0.78942200  |
| C | 4.79199000  | -0.90743400 | -1.53841800 |
| C | 4.68530200  | -2.16126300 | 0.94587700  |
| H | 3.59508000  | -0.41793000 | 1.60801400  |
| C | 5.35741000  | -2.16881900 | -1.36242000 |
| H | 4.80003000  | -0.41090300 | -2.50401800 |
| C | 5.31600600  | -2.80895500 | -0.12322100 |
| H | 4.62030700  | -2.65707500 | 1.91182600  |
| H | 5.83165100  | -2.66669700 | -2.20447900 |
| C | 5.94405300  | -4.16580600 | 0.06926300  |
| H | 5.31746300  | -4.80644800 | 0.69669300  |
| H | 6.09982900  | -4.67082700 | -0.88769200 |
| H | 6.91916500  | -4.07723900 | 0.56130500  |
| C | -1.27739700 | 0.38854800  | 0.33912200  |
| C | -0.72695600 | -0.19190200 | -0.91835800 |
| O | -1.35211500 | -0.11657800 | -1.96073600 |
| O | 0.41651400  | -0.81796600 | -0.74196500 |
| C | 1.69916100  | -2.69852600 | -1.40907900 |

|   |             |             |             |
|---|-------------|-------------|-------------|
| C | 1.06813500  | -1.40673700 | -1.88215800 |
| H | -2.06305500 | 1.10035300  | 0.13016100  |
| H | 2.27036600  | -3.15585100 | -2.22260200 |
| H | 2.37934400  | -2.50140900 | -0.57551400 |
| H | 0.92144000  | -3.39208700 | -1.07549200 |
| H | 0.32300000  | -1.56661200 | -2.66536100 |
| H | 1.80732100  | -0.68028300 | -2.23566800 |
| C | -2.48339800 | -2.29198800 | -0.34215300 |
| O | -1.52042200 | -3.02132700 | -0.18318000 |
| O | -3.24556600 | -2.34797600 | -1.46921200 |
| C | -2.83430900 | -1.23017000 | 0.58403200  |
| C | -2.68332400 | -3.05444000 | -2.58740200 |
| C | -3.10955300 | -2.32490300 | -3.84380800 |
| H | -3.04592900 | -4.08721700 | -2.56054800 |
| H | -1.59741400 | -3.07050800 | -2.47772200 |
| H | -2.73522600 | -2.84834000 | -4.72818400 |
| H | -4.20049600 | -2.27082700 | -3.91622500 |
| H | -2.69699200 | -1.31251100 | -3.83240200 |
| H | -2.61673900 | -1.48768400 | 1.61811200  |
| C | -4.42095700 | 0.25903200  | 1.68471300  |
| C | -4.43335000 | 0.19382500  | -0.74298000 |
| C | -5.28620600 | -1.72048900 | 0.56929900  |
| C | -5.75647000 | 1.02094000  | 1.49695400  |
| H | -3.55683300 | 0.92355500  | 1.74063600  |
| H | -4.42221000 | -0.38386300 | 2.56920100  |
| C | -5.93585800 | 0.53980300  | -0.82691900 |
| H | -4.04722100 | -0.36083800 | -1.59490200 |
| H | -3.82573700 | 1.08928700  | -0.61547600 |
| H | -5.21468800 | -2.27251400 | -0.36682000 |
| H | -5.00071900 | -2.38045900 | 1.39121000  |
| C | -6.66359300 | -1.05007100 | 0.77702100  |
| H | -5.57208400 | 2.05400900  | 1.18839700  |
| H | -6.30618100 | 1.04924300  | 2.44171500  |
| H | -6.45027900 | -0.10835200 | -1.54279000 |
| H | -6.05901300 | 1.57185100  | -1.16711900 |
| H | -7.40888100 | -1.51154000 | 0.12329200  |
| H | -7.00920300 | -1.16602400 | 1.80875700  |
| N | -4.21200100 | -0.64966900 | 0.50114500  |
| N | -6.58327800 | 0.37825100  | 0.47743000  |

### TS3-A-A

|                                          |                             |
|------------------------------------------|-----------------------------|
| Zero-point correction=                   | 0.734739 (Hartree/Particle) |
| Thermal correction to Energy=            | 0.777142                    |
| Thermal correction to Enthalpy=          | 0.778086                    |
| Thermal correction to Gibbs Free Energy= | 0.658829                    |

E(solv) = -2485.20238186 A.U.

Imaginary Frequency 484.38i

|   |             |             |             |
|---|-------------|-------------|-------------|
| C | -0.87816700 | -4.50650500 | -2.98710900 |
| C | -2.22514400 | -4.63930100 | -2.60974200 |
| C | -2.72521700 | -3.99293500 | -1.48780500 |
| C | -1.82821100 | -3.20834500 | -0.77340400 |
| C | -0.47891400 | -3.05313100 | -1.12309400 |
| C | 0.00503200  | -3.72507700 | -2.25668200 |
| O | -2.15619300 | -2.52213800 | 0.35106300  |
| C | -1.00462800 | -1.85357500 | 0.73869800  |
| C | 0.09210800  | -2.18163300 | -0.09405700 |
| C | -1.06488600 | -0.79068700 | 1.79249100  |
| C | -1.16220800 | -0.00626700 | 0.52884400  |
| N | 1.29403900  | -1.65902600 | 0.16403400  |
| C | 3.81889400  | -1.01854700 | -0.15836500 |
| C | 4.91282600  | -0.62292500 | -0.92794200 |
| C | 6.14640600  | -0.44796000 | -0.31710900 |
| C | 6.30872700  | -0.66738700 | 1.05623800  |
| C | 5.20080200  | -1.07133300 | 1.80184500  |
| C | 3.95472000  | -1.25256700 | 1.20349900  |
| C | 7.66056200  | -0.49583000 | 1.70055800  |
| S | 2.26351300  | -1.15994400 | -1.01746600 |
| O | 2.47631400  | -2.10131000 | -2.12295000 |
| O | 1.87008800  | 0.20470900  | -1.42942600 |
| C | -2.18436500 | -0.84624600 | 2.80264300  |
| C | -2.77076000 | -2.06170100 | 3.15617600  |
| C | -3.76023400 | -2.10924200 | 4.13526100  |
| C | -4.16995100 | -0.94427100 | 4.77381300  |
| C | -3.57178200 | 0.26820600  | 4.43831200  |
| C | -2.58237500 | 0.31858700  | 3.46339600  |
| C | -2.45811900 | 0.04878600  | -0.21461700 |
| O | -3.54717800 | 0.28065800  | 0.24612500  |
| O | -2.24474500 | -0.23546600 | -1.51488500 |
| C | -2.93674900 | -0.92162500 | -3.66736800 |
| C | -3.41506900 | -0.42140700 | -2.32202800 |
| H | -0.52078600 | -5.03048600 | -3.86761400 |
| H | -2.88720400 | -5.26112400 | -3.20481200 |
| H | -3.75741900 | -4.08450300 | -1.16795300 |
| H | 1.04217700  | -3.61718600 | -2.54712300 |
| H | -0.08530200 | -0.65550500 | 2.25372400  |
| H | -0.24294300 | 0.18215900  | -0.01228100 |
| H | 4.79008200  | -0.45538200 | -1.99422100 |
| H | 7.00163500  | -0.13755800 | -0.91228300 |
| H | 5.31145700  | -1.25020600 | 2.86824100  |
| H | 3.09185500  | -1.56940900 | 1.77890200  |

|   |             |             |             |
|---|-------------|-------------|-------------|
| H | 8.31342800  | -1.34348600 | 1.46506900  |
| H | 8.15789900  | 0.40988900  | 1.34100700  |
| H | 7.57692500  | -0.43145300 | 2.78836400  |
| H | -2.45909300 | -2.97577500 | 2.66289300  |
| H | -4.20921500 | -3.06269500 | 4.39731900  |
| H | -4.94336600 | -0.98168100 | 5.53537500  |
| H | -3.87053400 | 1.18064100  | 4.94600500  |
| H | -2.07539600 | 1.25056700  | 3.24133400  |
| H | -3.79036200 | -1.11843300 | -4.32165300 |
| H | -2.29072000 | -0.18168300 | -4.14859200 |
| H | -2.36718300 | -1.84711700 | -3.54169700 |
| H | -4.06912400 | -1.14049100 | -1.81892300 |
| H | -3.95900100 | 0.52832600  | -2.39521500 |
| C | 0.08871600  | 2.21252900  | 1.64079500  |
| O | 0.11182600  | 1.80878700  | 2.79365000  |
| O | 1.23749600  | 2.43168600  | 0.94136200  |
| C | -1.11212200 | 2.34578100  | 0.85775100  |
| C | 2.43355000  | 1.90119000  | 1.53394400  |
| C | 3.58581900  | 2.26385800  | 0.62423900  |
| H | 2.31498900  | 0.81605500  | 1.62020100  |
| H | 2.54712400  | 2.31293200  | 2.54039900  |
| H | 4.50978400  | 1.81101500  | 0.99899900  |
| H | 3.39849000  | 1.88025500  | -0.38227800 |
| H | 3.72018200  | 3.34953800  | 0.58092900  |
| H | -2.01732000 | 2.55324600  | 1.41783400  |
| C | -2.49020600 | 3.36738600  | -0.86803400 |
| C | -0.47097900 | 4.52913900  | -0.19730900 |
| C | -0.32129400 | 2.45355800  | -1.51834400 |
| C | -2.45467900 | 3.97097600  | -2.29008100 |
| H | -2.95035800 | 4.04087800  | -0.13926500 |
| H | -3.00766400 | 2.40845900  | -0.81318200 |
| C | -0.74206300 | 5.38688100  | -1.45764100 |
| H | 0.58996500  | 4.36748000  | -0.00976800 |
| H | -0.93238500 | 4.93423900  | 0.70603100  |
| H | 0.63081700  | 2.10371000  | -1.12355800 |
| H | -0.92170500 | 1.58419200  | -1.78888200 |
| C | -0.17272800 | 3.44152400  | -2.69283400 |
| H | -3.21631800 | 4.75041700  | -2.38411400 |
| H | -2.66785900 | 3.20456200  | -3.04186400 |
| H | 0.15733900  | 5.94507700  | -1.73193200 |
| H | -1.54096400 | 6.11281100  | -1.27621100 |
| H | 0.83109900  | 3.87583700  | -2.71841400 |
| H | -0.32880800 | 2.91704700  | -3.63968900 |
| N | -1.07387400 | 3.15241600  | -0.39859100 |
| N | -1.13947600 | 4.53934000  | -2.58126800 |

**TS3-A**

Zero-point correction= 0.734042 (Hartree/Particle)

Thermal correction to Energy= 0.777089

Thermal correction to Enthalpy= 0.778033

Thermal correction to Gibbs Free Energy= 0.656182

E(solv) = -2485.20491103 A.U.

Imaginary Frequency 497.30i

|   |             |             |             |
|---|-------------|-------------|-------------|
| C | 1.04691100  | 4.62378800  | -2.74083900 |
| C | 2.43258000  | 4.53980900  | -2.51921500 |
| C | 2.95610300  | 3.79006000  | -1.47450400 |
| C | 2.03975700  | 3.12464200  | -0.67026200 |
| C | 0.65140700  | 3.18899900  | -0.86733200 |
| C | 0.14406300  | 3.96061000  | -1.92379200 |
| O | 2.38028400  | 2.34483900  | 0.38828500  |
| C | 1.19269100  | 1.81312700  | 0.85697600  |
| C | 0.07108900  | 2.35312600  | 0.17752000  |
| C | 1.20437800  | 0.70484300  | 1.85807600  |
| C | 1.05610200  | 0.01127400  | 0.55584800  |
| N | -1.15717800 | 1.96705900  | 0.52759300  |
| C | -3.69175400 | 1.32688100  | 0.43795900  |
| C | -4.94598900 | 1.32610600  | -0.17231300 |
| C | -6.03221900 | 0.79267200  | 0.50665200  |
| C | -5.88991900 | 0.26220800  | 1.79488600  |
| C | -4.62880700 | 0.29022900  | 2.39028800  |
| C | -3.52602400 | 0.81855500  | 1.72078900  |
| C | -7.08392000 | -0.30623300 | 2.51749900  |
| S | -2.32850000 | 1.87047000  | -0.57432800 |
| O | -2.73253400 | 3.13303800  | -1.19796200 |
| O | -2.03874500 | 0.76029400  | -1.50910600 |
| C | 2.40798300  | 0.57939900  | 2.75132400  |
| C | 2.85783600  | 1.71428600  | 3.42869200  |
| C | 3.91633900  | 1.62222900  | 4.32574300  |
| C | 4.53254300  | 0.39297500  | 4.54953500  |
| C | 4.08591600  | -0.73699500 | 3.87076000  |
| C | 3.02584400  | -0.64990300 | 2.97175200  |
| C | 2.19737200  | -0.24407800 | -0.37442300 |
| O | 3.29999300  | -0.63185000 | -0.08718100 |
| O | 1.81257800  | 0.08662700  | -1.61895700 |
| C | 2.25441900  | 0.68701400  | -3.86048700 |
| C | 2.83130800  | 0.03256400  | -2.62398100 |
| H | 0.67822700  | 5.22462700  | -3.56562500 |
| H | 3.10990900  | 5.07480200  | -3.17814300 |
| H | 4.02044200  | 3.71285000  | -1.28312000 |
| H | -0.92577800 | 4.02687500  | -2.08660800 |



|   |             |             |             |
|---|-------------|-------------|-------------|
| H | 0.26107800  | 0.70028600  | 2.41124600  |
| H | 0.06831100  | 0.00668300  | 0.13031700  |
| H | -5.05975000 | 1.74845000  | -1.16649700 |
| H | -7.01163900 | 0.79061400  | 0.03454900  |
| H | -4.50548800 | -0.09982400 | 3.39739700  |
| H | -2.54812200 | 0.85863900  | 2.18803700  |
| H | -7.55025300 | -1.10866800 | 1.93680700  |
| H | -6.80314000 | -0.71128300 | 3.49279500  |
| H | -7.84542700 | 0.46368400  | 2.67852500  |
| H | 2.38026000  | 2.67353100  | 3.24430100  |
| H | 4.26177200  | 2.51069700  | 4.84579900  |
| H | 5.36185500  | 0.31915600  | 5.24682900  |
| H | 4.56672400  | -1.69734300 | 4.02956400  |
| H | 2.70382400  | -1.53576200 | 2.43261100  |
| H | 2.99076400  | 0.68230700  | -4.66883500 |
| H | 1.36064300  | 0.15484500  | -4.19722700 |
| H | 1.97676100  | 1.72265200  | -3.64168900 |
| H | 3.71640900  | 0.55758800  | -2.25169200 |
| H | 3.10716500  | -1.01546500 | -2.78896800 |
| C | 1.73855100  | -3.07253100 | 0.40861200  |
| O | 2.58369300  | -3.34034100 | 1.24484900  |
| O | 1.94399400  | -3.35727600 | -0.91735700 |
| C | 0.52600300  | -2.34385300 | 0.68324500  |
| C | 3.25382600  | -3.84816800 | -1.22951200 |
| C | 3.25120900  | -4.22813600 | -2.69567600 |
| H | 3.48076000  | -4.70450400 | -0.58907200 |
| H | 3.97773500  | -3.05875500 | -1.00411500 |
| H | 4.23603100  | -4.60060800 | -2.99033600 |
| H | 2.51384600  | -5.01256400 | -2.89027800 |
| H | 3.00797600  | -3.36646700 | -3.32469900 |
| H | 0.24875700  | -2.39133400 | 1.73268400  |
| C | -1.86684700 | -1.92200700 | 0.52172900  |
| C | -0.59588800 | -2.01333700 | -1.56060300 |
| C | -0.99748500 | -4.06217700 | -0.26994000 |
| C | -3.12831200 | -2.06920600 | -0.36357500 |
| H | -1.59923300 | -0.87591100 | 0.68311700  |
| H | -1.96918500 | -2.41394700 | 1.49344400  |
| C | -1.87164300 | -2.40281500 | -2.34682200 |
| H | 0.32108100  | -2.40555600 | -1.99511100 |
| H | -0.52293300 | -0.93185900 | -1.46501300 |
| H | -0.17469500 | -4.48978400 | -0.84551100 |
| H | -0.95684400 | -4.45883200 | 0.74692700  |
| C | -2.37991200 | -4.25429600 | -0.94245000 |
| H | -3.40015600 | -1.09906800 | -0.78464900 |
| H | -3.96743800 | -2.43532900 | 0.23590100  |

|   |             |             |             |
|---|-------------|-------------|-------------|
| H | -1.64242700 | -3.12724300 | -3.13472900 |
| H | -2.28883900 | -1.50398300 | -2.80791500 |
| H | -2.30396200 | -4.97647400 | -1.76071800 |
| H | -3.10883700 | -4.64072700 | -0.22370900 |
| N | -0.69067700 | -2.58491800 | -0.15784200 |
| N | -2.88319500 | -2.99173100 | -1.46987500 |

**TS3-B-1-A**

Zero-point correction= 0.734075 (Hartree/Particle)

Thermal correction to Energy= 0.777097

Thermal correction to Enthalpy= 0.778041

Thermal correction to Gibbs Free Energy= 0.655169

E(solv) = -2485.21515005 A.U.

Imaginary Frequency 492.72i

|   |             |             |             |
|---|-------------|-------------|-------------|
| C | -3.79898400 | -1.15383200 | -0.34325100 |
| C | -3.60507300 | -2.49815600 | -0.00483500 |
| C | -4.47747300 | -3.51017700 | -0.38547800 |
| C | -5.58707600 | -3.12422700 | -1.12487800 |
| C | -5.81554300 | -1.77939000 | -1.46353100 |
| C | -4.93264200 | -0.78249200 | -1.07912900 |
| C | -2.68295900 | -0.42712100 | 0.25438500  |
| C | -1.90471600 | -1.43621400 | 0.89328200  |
| H | -4.29043500 | -4.54051200 | -0.10586000 |
| H | -6.29871100 | -3.87995300 | -1.44327800 |
| H | -6.70035000 | -1.51835900 | -2.03415500 |
| H | -5.11433200 | 0.25457700  | -1.33747800 |
| O | -2.48939300 | -2.68453700 | 0.74562200  |
| C | -0.64698700 | -1.35985800 | 1.70332300  |
| H | -0.38725500 | -2.36658300 | 2.03767500  |
| N | -2.30322300 | 0.84274700  | 0.24433600  |
| C | -0.46565200 | -0.34860200 | 2.80363100  |
| C | -0.38080900 | -0.80850800 | 4.11801600  |
| C | -0.33102600 | 1.02162700  | 2.55870700  |
| C | -0.18722200 | 0.08030900  | 5.17256000  |
| H | -0.45326900 | -1.87472500 | 4.31322000  |
| C | -0.12650800 | 1.90894000  | 3.61074700  |
| H | -0.40794400 | 1.39212100  | 1.54187500  |
| C | -0.05926300 | 1.44308300  | 4.92245900  |
| H | -0.12527800 | -0.29613600 | 6.18892400  |
| H | -0.02651100 | 2.97143500  | 3.40256900  |
| H | 0.09532400  | 2.13727800  | 5.74282700  |
| S | -2.95614500 | 1.91408900  | -0.78993000 |
| O | -4.17268000 | 2.52552500  | -0.25611200 |
| O | -2.99756500 | 1.41890500  | -2.16956300 |
| C | -1.64161800 | 3.12315600  | -0.71758600 |

|   |             |             |             |
|---|-------------|-------------|-------------|
| C | -1.29347700 | 3.69622600  | 0.50445000  |
| C | -0.97061100 | 3.46323900  | -1.88430000 |
| C | -0.23941000 | 4.60061600  | 0.55297200  |
| H | -1.83658200 | 3.41584200  | 1.40332300  |
| C | 0.07132500  | 4.38821100  | -1.82279600 |
| H | -1.27115500 | 2.99946700  | -2.81856000 |
| C | 0.45527500  | 4.96240500  | -0.60887500 |
| H | 0.04277900  | 5.04921300  | 1.50285900  |
| H | 0.59437000  | 4.67048300  | -2.73421100 |
| C | 1.57098400  | 5.97523400  | -0.55105100 |
| H | 1.17198500  | 6.99472900  | -0.58950900 |
| H | 2.14384700  | 5.88484100  | 0.37688100  |
| H | 2.25971600  | 5.86010400  | -1.39316000 |
| C | -0.12464500 | -1.13768600 | 0.34193600  |
| C | 0.14868700  | -2.32192100 | -0.51113400 |
| O | 0.33677500  | -3.44474200 | -0.10905400 |
| O | 0.12228600  | -1.98645200 | -1.81816300 |
| C | 1.77535700  | -3.38520600 | -2.92497300 |
| C | 0.30151600  | -3.07435100 | -2.73750500 |
| H | -0.28057600 | -0.18306800 | -0.14433800 |
| H | 1.89970200  | -4.26091100 | -3.56844400 |
| H | 2.29731900  | -2.54296200 | -3.38987300 |
| H | 2.23181800  | -3.59425000 | -1.95365900 |
| H | -0.23680900 | -3.94394300 | -2.35543900 |
| H | -0.16625000 | -2.73552600 | -3.66315300 |
| C | 2.55552700  | -1.91802300 | 1.13647600  |
| O | 2.18473900  | -2.50969800 | 2.13268900  |
| O | 3.37767800  | -2.50840500 | 0.21022700  |
| C | 2.07389700  | -0.60550900 | 0.78261900  |
| C | 3.66387800  | -3.89277200 | 0.46084400  |
| C | 4.75085400  | -4.31208900 | -0.50708000 |
| H | 2.73842900  | -4.46201800 | 0.32610700  |
| H | 3.97904600  | -4.00878300 | 1.50051900  |
| H | 4.99792600  | -5.36665700 | -0.35832500 |
| H | 4.43122900  | -4.17938600 | -1.54497700 |
| H | 5.65766700  | -3.72130800 | -0.34769200 |
| H | 1.80176300  | -0.03347700 | 1.66211800  |
| C | 2.18493800  | 1.63569500  | -0.14680500 |
| C | 4.27800200  | 0.44341200  | 0.28485500  |
| C | 2.83026800  | -0.22735400 | -1.57589900 |
| C | 3.07651500  | 2.62075200  | -0.94097400 |
| H | 2.05444200  | 1.92867400  | 0.89757300  |
| H | 1.19296500  | 1.51379500  | -0.59289100 |
| C | 5.03431100  | 1.28220600  | -0.77437300 |
| H | 4.68315200  | -0.56156600 | 0.40259700  |

|   |            |             |             |
|---|------------|-------------|-------------|
| H | 4.23455700 | 0.92777200  | 1.26347100  |
| H | 3.39970700 | -1.15651700 | -1.57346100 |
| H | 1.79227600 | -0.45951900 | -1.81750900 |
| C | 3.44115700 | 0.86319800  | -2.49078200 |
| H | 3.57704300 | 3.32259500  | -0.26645000 |
| H | 2.45639600 | 3.20246800  | -1.62670100 |
| H | 5.71891900 | 0.65281400  | -1.35039800 |
| H | 5.62763400 | 2.06167800  | -0.28811100 |
| H | 4.17255100 | 0.41821000  | -3.17125500 |
| H | 2.66504100 | 1.33690800  | -3.09900500 |
| N | 2.83907000 | 0.27139300  | -0.15046900 |
| N | 4.09796500 | 1.90758200  | -1.70488100 |

### TS3-B-1

Zero-point correction= 0.734692 (Hartree/Particle)

Thermal correction to Energy= 0.777487

Thermal correction to Enthalpy= 0.778431

Thermal correction to Gibbs Free Energy= 0.657089

E(solv) = -2485.20689340 A.U.

Imaginary Frequency 440.49i

|   |             |             |             |
|---|-------------|-------------|-------------|
| C | 3.43535400  | -1.77467800 | 0.24788900  |
| C | 4.28616400  | -0.86776700 | 0.89829000  |
| C | 5.67094600  | -0.94126200 | 0.82752000  |
| C | 6.19745300  | -1.97386100 | 0.06336300  |
| C | 5.36900000  | -2.89749200 | -0.59745000 |
| C | 3.98788000  | -2.81443100 | -0.51449700 |
| C | 2.08446600  | -1.35768200 | 0.59979100  |
| C | 2.26599700  | -0.19601100 | 1.39160000  |
| H | 6.29309200  | -0.22080200 | 1.34585700  |
| H | 7.27537600  | -2.06947000 | -0.02420000 |
| H | 5.82180300  | -3.69144100 | -1.18197800 |
| H | 3.33896800  | -3.52151400 | -1.01903400 |
| O | 3.60146400  | 0.06819000  | 1.60951400  |
| C | 1.20423500  | 0.71189500  | 1.90336500  |
| H | 1.64728700  | 1.50750800  | 2.50865200  |
| N | 0.85010300  | -1.79261900 | 0.34878200  |
| C | 0.01746500  | 0.05832700  | 2.57191700  |
| C | 0.18374800  | -1.13137900 | 3.28460000  |
| C | -1.24376800 | 0.64870100  | 2.53582700  |
| C | -0.89163200 | -1.72244600 | 3.93889200  |
| H | 1.15949600  | -1.60823500 | 3.30352400  |
| C | -2.32551900 | 0.05521600  | 3.18523500  |
| H | -1.38842400 | 1.56965900  | 1.98687000  |
| C | -2.15388400 | -1.13296800 | 3.88964000  |
| H | -0.74573600 | -2.65307800 | 4.47811900  |

|   |             |             |             |
|---|-------------|-------------|-------------|
| H | -3.30299200 | 0.52820200  | 3.14298100  |
| H | -2.99453500 | -1.59745100 | 4.39627600  |
| S | 0.41486200  | -2.52242800 | -1.00936900 |
| O | 1.16346700  | -3.72618500 | -1.38242600 |
| O | 0.26611900  | -1.50868200 | -2.08003700 |
| C | -1.23699000 | -3.02952000 | -0.57065100 |
| C | -1.93066200 | -2.45382100 | 0.48949200  |
| C | -1.85586900 | -3.94602900 | -1.41865500 |
| C | -3.26588900 | -2.79699300 | 0.68788200  |
| H | -1.42654700 | -1.76064600 | 1.15536600  |
| C | -3.18908700 | -4.27341100 | -1.20668700 |
| H | -1.28929000 | -4.39593200 | -2.22856200 |
| C | -3.91399700 | -3.70267500 | -0.15443100 |
| H | -3.80560800 | -2.35216900 | 1.52072000  |
| H | -3.67774700 | -4.98665300 | -1.86564900 |
| C | -5.35193900 | -4.08948600 | 0.07913600  |
| H | -5.86317000 | -3.35684900 | 0.70886100  |
| H | -5.89861400 | -4.17194100 | -0.86470800 |
| H | -5.41628800 | -5.06133100 | 0.58070900  |
| C | 1.21904800  | 1.11515800  | 0.46466400  |
| C | 2.27036600  | 2.09981100  | 0.08558100  |
| O | 2.83583700  | 2.82462900  | 0.86485400  |
| O | 2.53479200  | 2.05270900  | -1.23465100 |
| C | 2.84229500  | 4.38795900  | -1.84051200 |
| C | 3.48957200  | 3.02148200  | -1.69664400 |
| H | 0.81921600  | 0.44372600  | -0.27640400 |
| H | 3.57804500  | 5.11921000  | -2.18729500 |
| H | 2.02725500  | 4.35385800  | -2.57103900 |
| H | 2.44570500  | 4.72412100  | -0.87827000 |
| H | 4.32509000  | 3.05346900  | -0.99421300 |
| H | 3.83549800  | 2.63145100  | -2.65528000 |
| C | -0.86604200 | 3.48397500  | 0.57431700  |
| O | -0.19736100 | 4.28688600  | 1.19428300  |
| O | -2.18614600 | 3.26195200  | 0.88902900  |
| C | -0.32720000 | 2.64636800  | -0.47490800 |
| C | -2.66310800 | 3.97994400  | 2.03440600  |
| C | -4.14397900 | 3.69060300  | 2.15732300  |
| H | -2.45962700 | 5.04518400  | 1.89930200  |
| H | -2.10622600 | 3.64629500  | 2.91671100  |
| H | -4.55682000 | 4.20286100  | 3.03023200  |
| H | -4.68117200 | 4.03503200  | 1.26905800  |
| H | -4.32165100 | 2.61733400  | 2.27196800  |
| H | 0.42571200  | 3.18323100  | -1.03979700 |
| C | -0.37066300 | 1.43436600  | -2.58480300 |
| C | -1.93027500 | 0.74751100  | -0.81687500 |

|   |             |             |             |
|---|-------------|-------------|-------------|
| C | -2.26805200 | 2.85414500  | -2.04634700 |
| C | -1.27393500 | 0.76407500  | -3.64817000 |
| H | 0.34785600  | 0.72513400  | -2.17803200 |
| H | 0.16520100  | 2.30646800  | -2.96698700 |
| C | -2.69138900 | -0.03107000 | -1.92016000 |
| H | -2.58507900 | 1.15495400  | -0.04563000 |
| H | -1.16226200 | 0.13547800  | -0.34119900 |
| H | -2.81670300 | 3.29970700  | -1.21918300 |
| H | -1.70357900 | 3.63533600  | -2.56183600 |
| C | -3.17590300 | 2.03542800  | -3.00033500 |
| H | -0.90741700 | -0.24783200 | -3.83260400 |
| H | -1.25128300 | 1.32591100  | -4.58708000 |
| H | -3.73283400 | -0.18480900 | -1.62308800 |
| H | -2.22853900 | -1.00877400 | -2.07121700 |
| H | -4.18779500 | 1.95981100  | -2.59146300 |
| H | -3.24513800 | 2.53205800  | -3.97271400 |
| N | -1.22675300 | 1.93786300  | -1.43967800 |
| N | -2.66034200 | 0.68673900  | -3.19339000 |

### TS3-B-A

|                                          |                             |
|------------------------------------------|-----------------------------|
| Zero-point correction=                   | 0.733936 (Hartree/Particle) |
| Thermal correction to Energy=            | 0.776903                    |
| Thermal correction to Enthalpy=          | 0.777848                    |
| Thermal correction to Gibbs Free Energy= | 0.654551                    |
| E(solv) = -2485.21276249                 | A.U.                        |

Imaginary Frequency 525.36i

|   |             |            |             |
|---|-------------|------------|-------------|
| C | -1.80933100 | 3.09323800 | -0.46642400 |
| C | -0.67357400 | 3.87496500 | -0.22249900 |
| C | -0.51112200 | 5.16391500 | -0.71229900 |
| C | -1.54501400 | 5.66802100 | -1.48990100 |
| C | -2.69398600 | 4.90762100 | -1.75690200 |
| C | -2.84433200 | 3.62481000 | -1.24943400 |
| C | -1.58275900 | 1.82686900 | 0.24354500  |
| C | -0.27328000 | 1.96022600 | 0.77565800  |
| H | 0.38330100  | 5.73475900 | -0.48973000 |
| H | -1.46204800 | 6.67123700 | -1.89686700 |
| H | -3.48429800 | 5.33422100 | -2.36548200 |
| H | -3.74358000 | 3.05301600 | -1.44315100 |
| O | 0.24253100  | 3.23099000 | 0.54641100  |
| C | 0.53899700  | 0.96452200 | 1.53798900  |
| H | -0.10752300 | 0.15639900 | 1.88550200  |
| N | -2.28671200 | 0.71989400 | 0.42596900  |
| C | 1.51131600  | 1.43030000 | 2.58818700  |
| C | 1.50513500  | 0.81190400 | 3.83938700  |
| C | 2.45814000  | 2.42768700 | 2.33117400  |

|   |             |             |             |
|---|-------------|-------------|-------------|
| C | 2.41503900  | 1.19235800  | 4.82201400  |
| H | 0.79772800  | 0.01130400  | 4.02857100  |
| C | 3.37056000  | 2.80451900  | 3.31262500  |
| H | 2.46906200  | 2.92933500  | 1.36819200  |
| C | 3.35060300  | 2.18957300  | 4.56227700  |
| H | 2.39528400  | 0.70205100  | 5.79044600  |
| H | 4.09310800  | 3.58781700  | 3.10285200  |
| H | 4.06029200  | 2.48678100  | 5.32841800  |
| S | -3.66266900 | 0.50876900  | -0.41910400 |
| O | -3.36549800 | 0.37440400  | -1.85608800 |
| O | -4.71677100 | 1.46451300  | -0.06262400 |
| C | -4.17011900 | -1.08067900 | 0.19810300  |
| C | -3.29825100 | -2.16649800 | 0.13362800  |
| C | -5.46163700 | -1.21958600 | 0.68370500  |
| C | -3.74177400 | -3.40546000 | 0.57273600  |
| H | -2.28641900 | -2.02626300 | -0.23542100 |
| C | -5.88990200 | -2.47364400 | 1.11658100  |
| H | -6.10944800 | -0.35031100 | 0.72430400  |
| C | -5.04103700 | -3.57802600 | 1.06808400  |
| H | -3.07001600 | -4.26048600 | 0.53569600  |
| H | -6.89942800 | -2.59248000 | 1.50110300  |
| C | -5.49774600 | -4.93453000 | 1.54130900  |
| H | -4.88192400 | -5.28725400 | 2.37528500  |
| H | -6.53725200 | -4.90859400 | 1.87731300  |
| H | -5.41931400 | -5.67743900 | 0.74075200  |
| C | 1.04950900  | 0.69058900  | 0.17549900  |
| C | 0.27854600  | -0.17380800 | -0.76295600 |
| O | -0.22792600 | -1.23068600 | -0.46756700 |
| O | 0.24035300  | 0.36439300  | -1.98849000 |
| C | -0.99113200 | 0.70000500  | -3.99355400 |
| C | -0.56133100 | -0.32593200 | -2.97030300 |
| H | 1.68938400  | 1.43776400  | -0.28145100 |
| H | -1.58808600 | 0.21464500  | -4.77022700 |
| H | -1.61420100 | 1.45234800  | -3.50440300 |
| H | -0.12907600 | 1.18437400  | -4.46144300 |
| H | 0.05338500  | -1.12606000 | -3.40398000 |
| H | -1.42850500 | -0.76101400 | -2.47322900 |
| C | 1.99496200  | -1.87537800 | 1.10531800  |
| O | 1.44469800  | -1.83207400 | 2.18896100  |
| O | 1.85682900  | -2.94193500 | 0.26496800  |
| C | 2.74858000  | -0.76579300 | 0.55603400  |
| C | 0.79213800  | -3.84957500 | 0.59065200  |
| C | 0.36716900  | -4.51622000 | -0.70072200 |
| H | -0.02324600 | -3.27785100 | 1.03689300  |
| H | 1.15823500  | -4.57025800 | 1.32926200  |

|   |             |             |             |
|---|-------------|-------------|-------------|
| H | -0.41943800 | -5.25100300 | -0.50673700 |
| H | -0.02357900 | -3.76208400 | -1.39010500 |
| H | 1.20763500  | -5.03366000 | -1.17390700 |
| H | 3.23121500  | -0.16768800 | 1.32419000  |
| C | 4.55585100  | 0.21733500  | -0.72982800 |
| C | 4.65915500  | -2.16850600 | -0.27550800 |
| C | 3.01442300  | -1.26570800 | -1.87645300 |
| C | 5.40197700  | 0.07038500  | -2.01780400 |
| H | 5.16657300  | 0.29937200  | 0.17320100  |
| H | 3.87201800  | 1.06736700  | -0.75912400 |
| C | 5.78002400  | -2.17510300 | -1.34318800 |
| H | 4.04482800  | -3.06821200 | -0.28791300 |
| H | 5.03130500  | -2.01086000 | 0.73891800  |
| H | 2.25037700  | -2.02222100 | -1.69730900 |
| H | 2.52443800  | -0.32459100 | -2.13498400 |
| C | 4.07377800  | -1.68338200 | -2.92091200 |
| H | 6.42747700  | 0.40103500  | -1.83227700 |
| H | 4.99352600  | 0.68807200  | -2.82268200 |
| H | 5.94869400  | -3.19224900 | -1.70701000 |
| H | 6.72353600  | -1.81090700 | -0.92582500 |
| H | 4.05470700  | -2.76385000 | -3.09069500 |
| H | 3.86763800  | -1.19356300 | -3.87662300 |
| N | 3.71218900  | -1.01770800 | -0.55709700 |
| N | 5.41954900  | -1.31878800 | -2.47231800 |

**TS3-B**

Zero-point correction= 0.734105 (Hartree/Particle)

Thermal correction to Energy= 0.776966

Thermal correction to Enthalpy= 0.777910

Thermal correction to Gibbs Free Energy= 0.656011

E(solv) = -2485.21424505 A.U.

Imaginary Frequency 497.00i

|   |             |            |             |
|---|-------------|------------|-------------|
| C | -1.94965600 | 2.82565300 | 0.35475600  |
| C | -0.72344700 | 3.42476600 | 0.66827400  |
| C | -0.48725200 | 4.78885000 | 0.56004200  |
| C | -1.54123000 | 5.56798100 | 0.10213900  |
| C | -2.78005700 | 4.99682300 | -0.22685800 |
| C | -3.00222500 | 3.63266200 | -0.10094400 |
| C | -1.77682200 | 1.39051000 | 0.62933900  |
| C | -0.41214200 | 1.27698600 | 1.00088600  |
| H | 0.47704000  | 5.20823500 | 0.82396700  |
| H | -1.40293700 | 6.64001300 | -0.00120600 |
| H | -3.58323600 | 5.63532500 | -0.57927100 |
| H | -3.96799500 | 3.20396400 | -0.33828200 |
| O | 0.20019200  | 2.52342800 | 1.08977100  |



|   |             |             |             |
|---|-------------|-------------|-------------|
| C | 0.41625400  | 0.07644800  | 1.32754700  |
| H | -0.22639400 | -0.79084200 | 1.49313500  |
| N | -2.56828000 | 0.33069600  | 0.57750300  |
| C | 1.44531800  | 0.26362500  | 2.40905600  |
| C | 1.21904900  | -0.30622600 | 3.66396900  |
| C | 2.58714400  | 1.04289600  | 2.21983700  |
| C | 2.10921900  | -0.09219500 | 4.71210600  |
| H | 0.33727100  | -0.92261100 | 3.81334600  |
| C | 3.48393400  | 1.25389700  | 3.26509000  |
| H | 2.76302500  | 1.51638400  | 1.25787900  |
| C | 3.24738400  | 0.68815100  | 4.51549200  |
| H | 1.91540300  | -0.53890500 | 5.68242900  |
| H | 4.36177700  | 1.87395900  | 3.10578700  |
| H | 3.94274600  | 0.85746400  | 5.33197300  |
| S | -4.04393100 | 0.48085300  | -0.09715700 |
| O | -3.92033000 | 0.77148700  | -1.53656300 |
| O | -4.94383500 | 1.35614800  | 0.66221500  |
| C | -4.64945100 | -1.18007200 | 0.09351600  |
| C | -3.87112800 | -2.26330400 | -0.31095600 |
| C | -5.93277700 | -1.35665400 | 0.59028800  |
| C | -4.40247400 | -3.54097600 | -0.20649500 |
| H | -2.86086500 | -2.10028300 | -0.67491900 |
| C | -6.44961100 | -2.64751500 | 0.68310500  |
| H | -6.50410200 | -0.49021400 | 0.90625500  |
| C | -5.69624700 | -3.75171600 | 0.28741100  |
| H | -3.80266500 | -4.39633600 | -0.50830500 |
| H | -7.45261300 | -2.79720800 | 1.07403500  |
| C | -6.24977300 | -5.15035900 | 0.38867200  |
| H | -5.61724600 | -5.77805200 | 1.02488100  |
| H | -7.25806900 | -5.14917200 | 0.81021100  |
| H | -6.29570300 | -5.62676000 | -0.59626500 |
| C | 0.76721400  | 0.20424700  | -0.10686700 |
| C | -0.19195600 | -0.33961000 | -1.11060000 |
| O | -0.76539600 | -1.39515800 | -1.00734900 |
| O | -0.31053000 | 0.49361400  | -2.15671300 |
| C | -1.76120000 | 1.44812400  | -3.78224300 |
| C | -1.31737000 | 0.15576600  | -3.13645700 |
| H | 1.35313300  | 1.06051600  | -0.41773800 |
| H | -2.51763900 | 1.23534900  | -4.54228700 |
| H | -2.21372100 | 2.09119700  | -3.02398400 |
| H | -0.92288600 | 1.96902300  | -4.25463600 |
| H | -0.86992700 | -0.54468000 | -3.85216800 |
| H | -2.15221300 | -0.32707500 | -2.62827800 |
| C | 2.71024700  | -1.91593800 | 0.60396900  |
| O | 1.94178800  | -2.54948000 | 1.29790900  |

|   |            |             |             |
|---|------------|-------------|-------------|
| O | 3.98137500 | -1.62566500 | 1.01646500  |
| C | 2.32667600 | -1.33707300 | -0.67270600 |
| C | 4.29011100 | -2.04016100 | 2.35627000  |
| C | 5.67809700 | -1.52862300 | 2.67401500  |
| H | 4.23039900 | -3.13137400 | 2.41061900  |
| H | 3.53791800 | -1.62695200 | 3.03197000  |
| H | 5.95400600 | -1.80824200 | 3.69443900  |
| H | 6.42091800 | -1.94882200 | 1.98898000  |
| H | 5.70570100 | -0.43775400 | 2.60017900  |
| H | 1.63885400 | -1.98984400 | -1.20204500 |
| C | 2.75353400 | -0.55707500 | -2.93906800 |
| C | 4.11034100 | 0.34875100  | -1.14202300 |
| C | 4.43007300 | -1.97703600 | -1.88860800 |
| C | 3.80921600 | 0.10141100  | -3.85976200 |
| H | 1.90317100 | 0.09488600  | -2.72862500 |
| H | 2.37248700 | -1.50040500 | -3.34029400 |
| C | 5.30222700 | 0.62826500  | -2.08725500 |
| H | 4.40429700 | 0.17887100  | -0.10757100 |
| H | 3.36389200 | 1.14487400  | -1.17700700 |
| H | 4.97424200 | -2.11172800 | -0.95453100 |
| H | 3.86276300 | -2.88588900 | -2.09981300 |
| C | 5.33431400 | -1.53589800 | -3.06524000 |
| H | 3.63753100 | 1.17892500  | -3.93531700 |
| H | 3.74172600 | -0.31613800 | -4.86785100 |
| H | 6.24635600 | 0.32976700  | -1.62225900 |
| H | 5.36299200 | 1.69807700  | -2.30531400 |
| H | 6.38403900 | -1.72708800 | -2.82628900 |
| H | 5.09414800 | -2.09213600 | -3.97605300 |
| N | 3.40070300 | -0.89660800 | -1.61841100 |
| N | 5.15985600 | -0.11112400 | -3.34185100 |

#### N-INT4

|                                          |                             |
|------------------------------------------|-----------------------------|
| Zero-point correction=                   | 0.652095 (Hartree/Particle) |
| Thermal correction to Energy=            | 0.690954                    |
| Thermal correction to Enthalpy=          | 0.691898                    |
| Thermal correction to Gibbs Free Energy= | 0.582449                    |
| E(solv) = -2442.84213313                 | A.U.                        |

|   |            |             |             |
|---|------------|-------------|-------------|
| C | 3.42860600 | -0.48352200 | -0.78195300 |
| C | 3.55239900 | 0.81909300  | -1.28390200 |
| C | 4.67821300 | 1.28375200  | -1.95300100 |
| C | 5.73171300 | 0.38895800  | -2.10153500 |
| C | 5.64363700 | -0.91859000 | -1.59326500 |
| C | 4.50417800 | -1.36849500 | -0.93698300 |
| C | 2.11881400 | -0.53495300 | -0.14058700 |
| C | 1.59143700 | 0.71875600  | -0.29936900 |

|   |             |             |             |
|---|-------------|-------------|-------------|
| H | 4.71691000  | 2.30059100  | -2.33018400 |
| H | 6.63344300  | 0.70533500  | -2.62021900 |
| H | 6.48336600  | -1.59611100 | -1.72786700 |
| H | 4.41002000  | -2.38697000 | -0.57802600 |
| O | 2.45435700  | 1.54825900  | -0.99975900 |
| C | 0.25519100  | 1.35110000  | 0.01331700  |
| H | -0.43996700 | 0.99675800  | -0.78893000 |
| N | 1.57304200  | -1.50291600 | 0.68413400  |
| C | 0.36356700  | 2.86779000  | -0.16265100 |
| C | 1.12816500  | 3.62596400  | 0.73030300  |
| C | -0.29210900 | 3.49979300  | -1.22230200 |
| C | 1.22950800  | 5.00578400  | 0.58623200  |
| H | 1.66132700  | 3.11539400  | 1.53261000  |
| C | -0.19327900 | 4.88618400  | -1.35365400 |
| H | -0.92657200 | 2.91634800  | -1.90125600 |
| C | 0.56242700  | 5.64150000  | -0.46092800 |
| H | 1.83160000  | 5.58298500  | 1.28455800  |
| H | -0.72825100 | 5.37334200  | -2.16471100 |
| H | 0.63215300  | 6.72131400  | -0.57547500 |
| S | 1.42214800  | -3.01473000 | 0.23597900  |
| O | 1.35155300  | -3.85259300 | 1.44503600  |
| O | 2.38866700  | -3.44029300 | -0.79836400 |
| C | -0.19639800 | -3.13010500 | -0.53097600 |
| C | -1.17118300 | -3.96617200 | 0.00542200  |
| C | -0.50395900 | -2.27369900 | -1.58706200 |
| C | -2.46001500 | -3.94137900 | -0.52902700 |
| H | -0.91248800 | -4.59349000 | 0.85258600  |
| C | -1.79185200 | -2.24876500 | -2.10789600 |
| H | 0.22616100  | -1.55764900 | -1.95592400 |
| C | -2.78551600 | -3.08336800 | -1.58393700 |
| H | -3.23478800 | -4.57515100 | -0.09755100 |
| H | -2.05842200 | -1.46837500 | -2.81499000 |
| C | -4.18359200 | -2.97516500 | -2.13890300 |
| H | -4.30879800 | -3.60794400 | -3.02789700 |
| H | -4.93253100 | -3.28910100 | -1.40167500 |
| H | -4.35710000 | -1.92916200 | -2.42403900 |
| N | -4.45568400 | 0.43871100  | 1.20146200  |
| N | -1.89163300 | 0.79611300  | 1.32519100  |
| C | -3.74491400 | -0.71605800 | 0.63159900  |
| H | -3.97587400 | -1.59969300 | 1.23897700  |
| H | -4.08978900 | -0.84731500 | -0.39707300 |
| C | -4.08110300 | 1.63203500  | 0.43897900  |
| H | -4.28280700 | 1.46776400  | -0.62522700 |
| H | -4.67723400 | 2.47815000  | 0.80157800  |
| C | -4.04201800 | 0.63006000  | 2.57783600  |

|   |             |             |             |
|---|-------------|-------------|-------------|
| H | -4.52214600 | 1.53942900  | 2.95866100  |
| H | -4.39388400 | -0.21471100 | 3.18118800  |
| C | -2.50321100 | 0.73364300  | 2.70479000  |
| H | -2.18300200 | 1.64238700  | 3.22583300  |
| H | -2.08200900 | -0.13263500 | 3.20159100  |
| C | -2.21632500 | -0.47701600 | 0.55775800  |
| H | -1.62218000 | -1.27936000 | 0.99958600  |
| H | -1.91543800 | -0.28889600 | -0.48125700 |
| C | -2.57237100 | 1.95150500  | 0.60764100  |
| H | -2.14265100 | 2.08504400  | -0.38418400 |
| H | -2.37460900 | 2.83849200  | 1.22136300  |
| C | -0.38834800 | 1.04982700  | 1.41735200  |
| H | -0.33145300 | 1.98365400  | 1.99185100  |
| C | 0.29748400  | 0.03895300  | 2.35271300  |
| O | 1.53106400  | 0.48128800  | 2.61086600  |
| O | -0.22104500 | -0.88157900 | 2.93683800  |
| C | 2.36639800  | -0.44210400 | 3.32840800  |
| H | 2.17162800  | -0.31446400 | 4.40142300  |
| H | 2.09372300  | -1.45293700 | 3.01732100  |
| C | 3.79921300  | -0.11916700 | 2.96341500  |
| H | 4.48056300  | -0.75782100 | 3.53505500  |
| H | 3.95503200  | -0.30618200 | 1.89776100  |
| H | 4.03666300  | 0.92777300  | 3.17895500  |
| C | -2.70930300 | 1.07512800  | -2.32427500 |
| O | -2.97471800 | 2.33190400  | -2.31848300 |
| O | -3.65432400 | 0.19239300  | -2.29627700 |
| O | -1.45902600 | 0.68411400  | -2.25697700 |

### N-INT6-A

|                                          |                             |
|------------------------------------------|-----------------------------|
| Zero-point correction=                   | 0.431294 (Hartree/Particle) |
| Thermal correction to Energy=            | 0.460245                    |
| Thermal correction to Enthalpy=          | 0.461189                    |
| Thermal correction to Gibbs Free Energy= | 0.367366                    |
| E(solv) = -1833.05214049                 | A.U.                        |

|   |             |             |            |
|---|-------------|-------------|------------|
| C | -0.40229700 | 0.63819900  | 1.99675300 |
| C | 0.75813000  | 0.19582800  | 2.65338600 |
| C | 0.83560100  | -0.04727600 | 4.02091400 |
| C | -0.31270600 | 0.17581600  | 4.76544600 |
| C | -1.48556900 | 0.63979200  | 4.14834000 |
| C | -1.54446700 | 0.87814900  | 2.78167800 |
| C | -0.02735800 | 0.76571700  | 0.57748000 |
| C | 1.31290500  | 0.40716500  | 0.54356000 |
| H | 1.76368600  | -0.39205900 | 4.46442300 |
| H | -0.30060100 | -0.00255800 | 5.83714900 |
| H | -2.36690400 | 0.82626100  | 4.75532500 |

|   |             |             |             |
|---|-------------|-------------|-------------|
| H | -2.44588300 | 1.25665100  | 2.31656400  |
| O | 1.78883200  | 0.05075500  | 1.80198700  |
| C | 2.23822900  | 0.20970700  | -0.54877600 |
| N | -0.68309400 | 1.15814000  | -0.54957700 |
| C | 3.17514700  | -0.94714400 | -0.42101200 |
| C | 4.49296100  | -0.85116800 | -0.87809500 |
| C | 2.74543100  | -2.16098000 | 0.12951300  |
| C | 5.35626800  | -1.94087800 | -0.80356200 |
| H | 4.83886300  | 0.09682800  | -1.28000900 |
| C | 3.60498100  | -3.25059800 | 0.20160000  |
| H | 1.72331600  | -2.24094900 | 0.48787800  |
| C | 4.91470500  | -3.14573600 | -0.26479200 |
| H | 6.37818900  | -1.84462800 | -1.15983800 |
| H | 3.25099200  | -4.18761800 | 0.62212100  |
| H | 5.58700700  | -3.99691800 | -0.20331500 |
| S | -2.25483600 | 1.09942500  | -0.74587700 |
| O | -2.55883600 | 1.65634800  | -2.06545700 |
| O | -3.05208900 | 1.61541300  | 0.38362800  |
| C | -2.66559400 | -0.64914000 | -0.84903400 |
| C | -2.57106200 | -1.29300400 | -2.08109900 |
| C | -3.00394600 | -1.36346600 | 0.29419800  |
| C | -2.81993400 | -2.65704200 | -2.16169500 |
| H | -2.31430500 | -0.70675400 | -2.95802100 |
| C | -3.24641500 | -2.73251900 | 0.20063200  |
| H | -3.08760300 | -0.84474000 | 1.24459100  |
| C | -3.15619300 | -3.39696400 | -1.02257200 |
| H | -2.75444400 | -3.16160600 | -3.12362700 |
| H | -3.51473100 | -3.29319800 | 1.09339600  |
| C | -3.39748400 | -4.88286100 | -1.12137800 |
| H | -4.04615800 | -5.12488700 | -1.96963800 |
| H | -2.45692600 | -5.42693000 | -1.26550300 |
| H | -3.86849400 | -5.26921100 | -0.21302500 |
| C | 2.26351900  | 0.91771700  | -1.70376100 |
| H | 2.84827700  | 0.53435200  | -2.53471900 |
| C | 1.53307400  | 2.15658600  | -2.04051700 |
| O | 1.29733700  | 2.95078800  | -0.98702700 |
| O | 1.25753400  | 2.46095500  | -3.18156300 |
| C | 0.31006600  | 3.96298200  | -1.20846800 |
| H | 0.76354600  | 4.78197600  | -1.78074800 |
| H | -0.50422500 | 3.53111600  | -1.79645200 |
| C | -0.17398100 | 4.42004600  | 0.15201900  |
| H | -0.88127400 | 5.24770000  | 0.03866900  |
| H | -0.68300200 | 3.59505200  | 0.65760700  |
| H | 0.66342600  | 4.75668500  | 0.77115000  |

**N-INT6-B**

Zero-point correction= 0.430332 (Hartree/Particle)  
Thermal correction to Energy= 0.459684  
Thermal correction to Enthalpy= 0.460628  
Thermal correction to Gibbs Free Energy= 0.366349

E(solv) = -1833.05405302 A.U.

|   |             |             |             |
|---|-------------|-------------|-------------|
| C | 3.29495300  | 0.31528000  | 0.03343700  |
| C | 3.83298300  | -0.96489700 | -0.14081300 |
| C | 5.19073800  | -1.19996100 | -0.33167100 |
| C | 6.02211800  | -0.08775900 | -0.33236300 |
| C | 5.50963200  | 1.20655100  | -0.14123200 |
| C | 4.15121000  | 1.42340900  | 0.04532100  |
| C | 1.85594000  | 0.12344900  | 0.22174900  |
| C | 1.66578900  | -1.25673300 | 0.11662900  |
| H | 5.56574200  | -2.20863200 | -0.46763700 |
| H | 7.09033400  | -0.22304100 | -0.47852000 |
| H | 6.19061000  | 2.05221900  | -0.13802300 |
| H | 3.75992800  | 2.42303400  | 0.20116700  |
| O | 2.88075000  | -1.91674900 | -0.08646900 |
| C | 0.50144700  | -2.08377300 | 0.17663300  |
| N | 0.87666500  | 1.00521400  | 0.50572500  |
| C | -0.82859100 | -1.40312100 | 0.20220300  |
| C | -1.69814300 | -1.61781300 | 1.27122600  |
| C | -1.22551300 | -0.55891300 | -0.83668900 |
| C | -2.95349700 | -1.01511900 | 1.29647700  |
| H | -1.38192200 | -2.26710400 | 2.08356400  |
| C | -2.47983600 | 0.03784700  | -0.81893100 |
| H | -0.53127300 | -0.35788900 | -1.64771000 |
| C | -3.35015700 | -0.19141700 | 0.24647800  |
| H | -3.61869500 | -1.18738700 | 2.13859800  |
| H | -2.76993200 | 0.71038100  | -1.62129300 |
| H | -4.32345200 | 0.29265400  | 0.26614700  |
| S | 1.02441700  | 2.55031800  | 0.13903900  |
| O | 1.58054100  | 2.80275400  | -1.20268600 |
| O | 1.59599400  | 3.36848100  | 1.22284100  |
| C | -0.71435400 | 2.96206600  | 0.05517200  |
| C | -1.23763800 | 3.47285800  | -1.12261000 |
| C | -1.53001600 | 2.75318300  | 1.16570100  |
| C | -2.59824600 | 3.77620800  | -1.19166000 |
| H | -0.57467400 | 3.61470100  | -1.97015400 |
| C | -2.88019300 | 3.05785700  | 1.08354200  |
| H | -1.10262900 | 2.32493500  | 2.06688500  |
| C | -3.43494400 | 3.57018400  | -0.09642400 |
| H | -3.01590600 | 4.17330700  | -2.11444300 |
| H | -3.52603200 | 2.87907200  | 1.94104400  |

|   |             |             |             |
|---|-------------|-------------|-------------|
| C | -4.91023400 | 3.87641100  | -0.17030400 |
| H | -5.20283100 | 4.61103800  | 0.58795400  |
| H | -5.18350100 | 4.27724700  | -1.15042500 |
| H | -5.50995600 | 2.97563100  | 0.00319900  |
| C | 0.62319600  | -3.44473400 | 0.23151600  |
| C | -0.45026600 | -4.43130900 | 0.14999700  |
| O | -0.37447000 | -5.57528100 | 0.56031200  |
| O | -1.56343100 | -3.97752000 | -0.47726100 |
| C | -3.84413500 | -4.05011200 | -1.04901100 |
| C | -2.70582300 | -4.81717100 | -0.40560600 |
| H | -4.77279700 | -4.62745500 | -1.00189700 |
| H | -3.98658700 | -3.09509100 | -0.53473600 |
| H | -3.61475800 | -3.83856800 | -2.09693400 |
| H | -2.50231000 | -5.76464800 | -0.91700000 |
| H | -2.91760600 | -5.05343000 | 0.64383900  |
| H | 1.60732000  | -3.88086600 | 0.35517500  |

### N-INT6-C

|                                          |                             |
|------------------------------------------|-----------------------------|
| Zero-point correction=                   | 0.430447 (Hartree/Particle) |
| Thermal correction to Energy=            | 0.459978                    |
| Thermal correction to Enthalpy=          | 0.460922                    |
| Thermal correction to Gibbs Free Energy= | 0.365225                    |

E(solv) = -1833.05329120 A.U.

|   |             |             |             |
|---|-------------|-------------|-------------|
| C | -1.45240500 | 2.72542300  | -0.08125000 |
| C | -2.81566300 | 2.39979500  | -0.06824900 |
| C | -3.82967700 | 3.35242300  | -0.10192600 |
| C | -3.43688100 | 4.68203100  | -0.15371600 |
| C | -2.07738000 | 5.03791100  | -0.16994800 |
| C | -1.07780800 | 4.07621600  | -0.13376400 |
| C | -0.74133900 | 1.44738300  | -0.03864900 |
| C | -1.74859700 | 0.47655900  | -0.00269200 |
| H | -4.87142100 | 3.05050000  | -0.09011900 |
| H | -4.19435600 | 5.46055100  | -0.18305200 |
| H | -1.80380500 | 6.08790000  | -0.21070000 |
| H | -0.03254100 | 4.36184900  | -0.14089600 |
| O | -3.01415000 | 1.07019900  | -0.02168100 |
| C | -1.69046600 | -0.95209200 | 0.01195500  |
| N | 0.57126700  | 1.13739400  | -0.03361800 |
| C | -2.99933400 | -1.66986500 | 0.09823200  |
| C | -3.86901100 | -1.43011400 | 1.16446200  |
| C | -3.38808700 | -2.56544000 | -0.89957000 |
| C | -5.09474700 | -2.08437900 | 1.24033200  |
| H | -3.57640400 | -0.72186900 | 1.93374400  |
| C | -4.61711000 | -3.21131100 | -0.83230100 |
| H | -2.70952800 | -2.75725700 | -1.72499700 |

|   |             |             |             |
|---|-------------|-------------|-------------|
| C | -5.47438800 | -2.97512900 | 0.24008300  |
| H | -5.75696000 | -1.89246200 | 2.08002900  |
| H | -4.90436000 | -3.90585000 | -1.61672500 |
| H | -6.43383000 | -3.48225400 | 0.29484600  |
| S | 1.70108200  | 2.26576500  | -0.12924200 |
| O | 1.75923600  | 3.18086600  | 1.02523400  |
| O | 1.75852900  | 2.92594700  | -1.44432600 |
| C | 3.13741200  | 1.20569500  | 0.00604200  |
| C | 4.18834200  | 1.61011400  | 0.81619800  |
| C | 3.21623200  | 0.01718700  | -0.71847900 |
| C | 5.33182600  | 0.81673700  | 0.90226500  |
| H | 4.08697400  | 2.52908600  | 1.38453600  |
| C | 4.35684100  | -0.76690800 | -0.61774100 |
| H | 2.37338600  | -0.29417500 | -1.32723400 |
| C | 5.43162800  | -0.37766200 | 0.19067600  |
| H | 6.15460000  | 1.12590700  | 1.54311500  |
| H | 4.41330400  | -1.70423000 | -1.16692000 |
| C | 6.66485600  | -1.24160600 | 0.28169600  |
| H | 7.21460200  | -1.24857900 | -0.66636600 |
| H | 7.34446000  | -0.88215900 | 1.05947100  |
| H | 6.40348800  | -2.27972400 | 0.51292200  |
| C | -0.49080800 | -1.60520600 | -0.07453400 |
| H | 0.40948300  | -1.01386900 | -0.16362000 |
| C | -0.28611800 | -3.04244400 | 0.02593800  |
| O | 1.04295900  | -3.32007500 | -0.16875400 |
| O | -1.07745500 | -3.93748500 | 0.25332400  |
| C | 1.39750100  | -4.68744000 | -0.04560500 |
| H | 1.12616400  | -5.05043400 | 0.95220700  |
| H | 0.82987200  | -5.28489100 | -0.76814400 |
| C | 2.89131500  | -4.78168000 | -0.28881800 |
| H | 3.23362400  | -5.81611500 | -0.18740400 |
| H | 3.13561600  | -4.42992200 | -1.29519300 |
| H | 3.43170100  | -4.15880300 | 0.42949600  |

#### N-INT6-D

|                                          |                |            |                             |
|------------------------------------------|----------------|------------|-----------------------------|
| Zero-point correction=                   |                |            | 0.431362 (Hartree/Particle) |
| Thermal correction to Energy=            |                |            | 0.460238                    |
| Thermal correction to Enthalpy=          |                |            | 0.461182                    |
| Thermal correction to Gibbs Free Energy= |                |            | 0.368927                    |
| E(solvent) =                             | -1833.04776827 | A.U.       |                             |
| C                                        | -1.12137800    | 2.52875900 | -0.01679100                 |
| C                                        | -2.46993000    | 2.32296100 | 0.30447300                  |
| C                                        | -3.38576500    | 3.36216500 | 0.43794000                  |
| C                                        | -2.90466000    | 4.64752200 | 0.23038900                  |
| C                                        | -1.55812800    | 4.87983700 | -0.10106100                 |



|   |             |             |             |
|---|-------------|-------------|-------------|
| C | -0.65629400 | 3.83291900  | -0.23181600 |
| C | -0.52120400 | 1.19826200  | -0.06474900 |
| C | -1.55956700 | 0.33140100  | 0.26041900  |
| H | -4.42167000 | 3.15875600  | 0.68645600  |
| H | -3.58465000 | 5.49021000  | 0.32280700  |
| H | -1.22004200 | 5.89957900  | -0.26030400 |
| H | 0.38514500  | 3.99972400  | -0.48876400 |
| O | -2.75038100 | 1.01674500  | 0.46450100  |
| C | -1.55585900 | -1.08635000 | 0.49421500  |
| N | 0.71911900  | 0.78721400  | -0.43755800 |
| C | -0.30464000 | -1.69466100 | 1.03926300  |
| C | 0.07201100  | -2.98800600 | 0.66265300  |
| C | 0.49614500  | -1.00383400 | 1.95778500  |
| C | 1.21041100  | -3.58581200 | 1.20106700  |
| H | -0.52285000 | -3.51383800 | -0.07888300 |
| C | 1.63578700  | -1.59478200 | 2.48740800  |
| H | 0.24845600  | 0.01824600  | 2.22442800  |
| C | 1.99379800  | -2.89160200 | 2.11845900  |
| H | 1.49114300  | -4.58833400 | 0.88925200  |
| H | 2.25925300  | -1.02116500 | 3.16578300  |
| H | 2.89287700  | -3.34690300 | 2.52444800  |
| S | 2.00162400  | 1.60445300  | 0.02157400  |
| O | 2.09960700  | 1.73225800  | 1.49100400  |
| O | 2.28461800  | 2.85497500  | -0.71470800 |
| C | 3.28116000  | 0.46448900  | -0.50273700 |
| C | 4.53152500  | 0.98811200  | -0.81207900 |
| C | 3.06847500  | -0.91105700 | -0.51565900 |
| C | 5.57819300  | 0.12643300  | -1.12846800 |
| H | 4.66381400  | 2.06553400  | -0.81359700 |
| C | 4.12290400  | -1.76018600 | -0.83241500 |
| H | 2.07864100  | -1.29676800 | -0.29558000 |
| C | 5.38965000  | -1.25681700 | -1.14193000 |
| H | 6.55720800  | 0.53364500  | -1.37231600 |
| H | 3.95595000  | -2.83568900 | -0.83733100 |
| C | 6.51601500  | -2.18909300 | -1.51406300 |
| H | 6.50418400  | -3.09209900 | -0.89562400 |
| H | 6.43593000  | -2.50922900 | -2.55961500 |
| H | 7.48931700  | -1.70505000 | -1.39076500 |
| C | -2.64649500 | -1.89792800 | 0.37640100  |
| C | -3.88344900 | -1.59229800 | -0.34060100 |
| O | -4.09847800 | -0.71204200 | -1.14335000 |
| O | -4.83643500 | -2.53241800 | -0.03454300 |
| C | -5.97251100 | -2.96907000 | -2.13983300 |
| C | -6.06717900 | -2.39579400 | -0.73465800 |
| H | -6.94428400 | -2.91665800 | -2.64157200 |

|   |             |             |             |
|---|-------------|-------------|-------------|
| H | -5.24639700 | -2.39777000 | -2.72172300 |
| H | -5.65529700 | -4.01526300 | -2.10251900 |
| H | -6.79833200 | -2.94388100 | -0.13390600 |
| H | -6.34925000 | -1.34006100 | -0.77050700 |
| H | -2.60450900 | -2.89427900 | 0.80265600  |

**N-INT7-A**

|                                          |                             |
|------------------------------------------|-----------------------------|
| Zero-point correction=                   | 0.733893 (Hartree/Particle) |
| Thermal correction to Energy=            | 0.778139                    |
| Thermal correction to Enthalpy=          | 0.779083                    |
| Thermal correction to Gibbs Free Energy= | 0.651407                    |

E(solv) = -2485.29989120 A.U.

|   |             |             |             |
|---|-------------|-------------|-------------|
| C | 0.45351200  | -2.77825300 | 0.23082100  |
| C | 1.72887000  | -2.33350500 | 0.59161400  |
| C | 2.79276900  | -3.19807600 | 0.80486700  |
| C | 2.54088500  | -4.55406100 | 0.62159300  |
| C | 1.27653100  | -5.02344600 | 0.24246000  |
| C | 0.21988300  | -4.14514300 | 0.04511100  |
| C | -0.37060400 | -1.57164900 | 0.12305700  |
| C | 0.55724100  | -0.45839100 | 0.45292200  |
| H | 3.76720500  | -2.82441000 | 1.09990700  |
| H | 3.34689100  | -5.26485200 | 0.77615800  |
| H | 1.11991300  | -6.08773700 | 0.10599200  |
| H | -0.76025500 | -4.51036200 | -0.23666300 |
| O | 1.81647000  | -0.97644800 | 0.71279000  |
| C | 0.30738200  | 0.85533200  | 0.52949800  |
| N | -1.59254200 | -1.32118600 | -0.18535600 |
| C | -1.08808500 | 1.36205600  | 0.40362100  |
| C | -1.55429700 | 1.91033100  | -0.79315600 |
| C | -1.94124300 | 1.27008400  | 1.50607000  |
| C | -2.87400400 | 2.34195700  | -0.89173300 |
| H | -0.88918100 | 1.97076900  | -1.65084100 |
| C | -3.26023500 | 1.69985700  | 1.40101800  |
| H | -1.56482600 | 0.83038300  | 2.42714900  |
| C | -3.73076800 | 2.23029800  | 0.20132500  |
| H | -3.23962000 | 2.74852800  | -1.83036900 |
| H | -3.92712900 | 1.60907300  | 2.25329500  |
| H | -4.76515900 | 2.55085700  | 0.11686100  |
| S | -2.67681900 | -2.54169100 | -0.53502600 |
| O | -2.79410800 | -3.45764600 | 0.59545100  |
| O | -2.38686100 | -3.07286900 | -1.86220300 |
| C | -4.15428900 | -1.56352000 | -0.61088400 |
| C | -4.95693500 | -1.46968200 | 0.51759100  |
| C | -4.46424900 | -0.88665300 | -1.78673100 |
| C | -6.09735600 | -0.67287400 | 0.46413700  |

|   |             |             |             |
|---|-------------|-------------|-------------|
| H | -4.68944500 | -2.01901000 | 1.41451600  |
| C | -5.60563900 | -0.09706000 | -1.82053500 |
| H | -3.81911500 | -0.98732200 | -2.65412400 |
| C | -6.43449100 | 0.02154900  | -0.69872900 |
| H | -6.73684600 | -0.59295600 | 1.33925200  |
| H | -5.86212200 | 0.43842600  | -2.73138900 |
| C | -7.67390800 | 0.87705000  | -0.76107400 |
| H | -7.44785700 | 1.86930000  | -1.16476300 |
| H | -8.42760300 | 0.42478400  | -1.41454400 |
| H | -8.12035500 | 1.00444400  | 0.22806500  |
| C | 1.41347600  | 1.83786500  | 0.88067700  |
| C | 1.14060800  | 3.10588200  | 0.08539300  |
| O | 1.46899300  | 3.26833000  | -1.06668400 |
| O | 0.40570000  | 3.98185500  | 0.77475500  |
| C | -1.36684900 | 5.54913500  | 0.82589100  |
| C | -0.18049300 | 5.05836300  | 0.02564300  |
| H | -1.85577600 | 6.37620000  | 0.30382400  |
| H | -2.08853200 | 4.73615400  | 0.95178300  |
| H | -1.05294100 | 5.89755500  | 1.81325700  |
| H | 0.57778800  | 5.83236000  | -0.12757800 |
| H | -0.48070200 | 4.67350800  | -0.95276100 |
| H | 2.37296900  | 1.43172400  | 0.53478600  |
| C | 1.42917100  | 2.10045200  | 2.40471700  |
| C | 1.68465300  | 0.80160700  | 3.12646900  |
| O | 0.82522300  | 0.09757800  | 3.60081900  |
| O | 2.98615000  | 0.48497100  | 3.11326500  |
| C | 4.74780600  | -1.09123000 | 3.20550700  |
| C | 3.31131700  | -0.82333600 | 3.59806800  |
| H | 2.21451900  | 2.82432600  | 2.63881000  |
| H | 0.46412000  | 2.49436100  | 2.72724000  |
| H | 4.85971400  | -0.99975800 | 2.12049600  |
| H | 5.42271600  | -0.37315200 | 3.67838200  |
| H | 5.04245800  | -2.09960600 | 3.51008900  |
| H | 3.16489200  | -0.84816100 | 4.68266200  |
| H | 2.61993900  | -1.54394200 | 3.15131800  |
| N | 4.70026400  | 0.13172400  | -3.55575300 |
| C | 5.07712800  | 1.48881800  | -3.14733900 |
| C | 4.59948800  | -0.42118300 | -1.13997800 |
| C | 2.60980100  | 0.30919600  | -2.23014200 |
| C | 3.23709500  | 0.05562900  | -3.63233800 |
| C | 5.16825600  | -0.81241000 | -2.53653300 |
| C | 4.37673500  | 1.86180600  | -1.80725100 |
| N | 3.65808400  | 0.69427900  | -1.27443300 |
| H | 6.16874300  | 1.51950000  | -3.05394900 |
| H | 4.79551300  | 2.17784500  | -3.95112200 |

|   |            |             |             |
|---|------------|-------------|-------------|
| H | 5.39652000 | -0.10809900 | -0.45481900 |
| H | 4.06569800 | -1.25813700 | -0.67679800 |
| H | 2.12636300 | -0.59643300 | -1.84446400 |
| H | 1.86441800 | 1.11090900  | -2.24976900 |
| H | 2.96430500 | -0.93131700 | -4.02183100 |
| H | 2.90152600 | 0.80230400  | -4.36037300 |
| H | 4.84160600 | -1.81536200 | -2.83335600 |
| H | 6.26397200 | -0.80659800 | -2.54091300 |
| H | 5.10248500 | 2.18722000  | -1.05288500 |
| H | 3.64412200 | 2.66307700  | -1.93672100 |

### N-INT7

|                                          |                             |
|------------------------------------------|-----------------------------|
| Zero-point correction=                   | 0.545456 (Hartree/Particle) |
| Thermal correction to Energy=            | 0.582091                    |
| Thermal correction to Enthalpy=          | 0.583035                    |
| Thermal correction to Gibbs Free Energy= | 0.471017                    |

E(solv) = -2140.00571021 A.U.

|   |             |             |             |
|---|-------------|-------------|-------------|
| C | 1.51414100  | -2.56508100 | -0.57846200 |
| C | 2.76911100  | -1.96427900 | -0.71154700 |
| C | 3.94103900  | -2.69051000 | -0.85371000 |
| C | 3.81540100  | -4.07618100 | -0.86454300 |
| C | 2.56880200  | -4.70423000 | -0.73987500 |
| C | 1.40564300  | -3.95965600 | -0.59699800 |
| C | 0.55643100  | -1.46267000 | -0.46508300 |
| C | 1.39401000  | -0.23575600 | -0.52849700 |
| H | 4.89793600  | -2.19205900 | -0.95935300 |
| H | 4.70782500  | -4.68426800 | -0.97597100 |
| H | 2.51227200  | -5.78688900 | -0.75525400 |
| H | 0.44273000  | -4.44595100 | -0.49653100 |
| O | 2.72176900  | -0.59935900 | -0.68534900 |
| C | 1.03026100  | 1.04812000  | -0.42486100 |
| N | -0.71847100 | -1.36426800 | -0.34835100 |
| C | -0.38655800 | 1.41983400  | -0.15591800 |
| C | -1.23229100 | 1.79734500  | -1.20121900 |
| C | -0.87288300 | 1.37131500  | 1.15240800  |
| C | -2.56594600 | 2.09924700  | -0.94056000 |
| H | -0.84647500 | 1.82892300  | -2.21707200 |
| C | -2.20740500 | 1.67237000  | 1.40679600  |
| H | -0.20419100 | 1.06278100  | 1.95282800  |
| C | -3.05719600 | 2.02950200  | 0.36177100  |
| H | -3.22652700 | 2.37290700  | -1.75812700 |
| H | -2.58944500 | 1.61320300  | 2.42150900  |
| H | -4.10266400 | 2.24619800  | 0.56149300  |
| S | -1.69701200 | -2.71257800 | -0.22805800 |
| O | -1.32990000 | -3.49859700 | 0.94536400  |

|   |             |             |             |
|---|-------------|-------------|-------------|
| O | -1.78381800 | -3.36344400 | -1.53031300 |
| C | -3.22725900 | -1.88121700 | 0.10735800  |
| C | -3.62612800 | -1.70269800 | 1.42505400  |
| C | -3.97257800 | -1.38245600 | -0.95649400 |
| C | -4.80324100 | -1.00428900 | 1.67863300  |
| H | -3.02170500 | -2.10920600 | 2.22957200  |
| C | -5.14348700 | -0.68852800 | -0.68346000 |
| H | -3.63348200 | -1.54368900 | -1.97490600 |
| C | -5.57323700 | -0.48970200 | 0.63382900  |
| H | -5.12965500 | -0.85795300 | 2.70480400  |
| H | -5.73711400 | -0.29224400 | -1.50350800 |
| C | -6.85478800 | 0.25445800  | 0.90913000  |
| H | -6.92333900 | 1.16105900  | 0.29992600  |
| H | -7.72480900 | -0.36609000 | 0.66885700  |
| H | -6.93015900 | 0.54189000  | 1.96073900  |
| C | 2.07433800  | 2.15165200  | -0.46705700 |
| C | 1.48351500  | 3.30078900  | -1.27274900 |
| O | 1.52139700  | 3.36429200  | -2.47589300 |
| O | 0.83904600  | 4.17141200  | -0.49027100 |
| C | -1.01035500 | 5.60341300  | -0.12439100 |
| C | -0.01543500 | 5.11576200  | -1.15473700 |
| H | -1.69355400 | 6.32778800  | -0.57606800 |
| H | -1.59262500 | 4.75864400  | 0.25586800  |
| H | -0.49862200 | 6.08328200  | 0.71379000  |
| H | 0.60255100  | 5.92211100  | -1.56149800 |
| H | -0.50697000 | 4.60881000  | -1.98960900 |
| H | 2.95771700  | 1.79535300  | -1.00228900 |
| C | 2.46353900  | 2.56642500  | 0.97013300  |
| C | 3.03548600  | 1.36341300  | 1.67934700  |
| O | 2.42303700  | 0.65754600  | 2.44421700  |
| O | 4.29492500  | 1.12386400  | 1.28992600  |
| C | 6.20312000  | -0.26352500 | 1.07497600  |
| C | 4.86100300  | -0.10889200 | 1.75579500  |
| H | 3.20228000  | 3.37145900  | 0.92972700  |
| H | 1.58114900  | 2.90862100  | 1.51247200  |
| H | 6.07908100  | -0.24236800 | -0.01153400 |
| H | 6.87891800  | 0.54782600  | 1.35679300  |
| H | 6.66203100  | -1.21441600 | 1.35910300  |
| H | 4.94944500  | -0.07062300 | 2.84563100  |
| H | 4.17491400  | -0.92354300 | 1.50412700  |

#### N-INT8-A

|                                 |                             |
|---------------------------------|-----------------------------|
| Zero-point correction=          | 0.736428 (Hartree/Particle) |
| Thermal correction to Energy=   | 0.779848                    |
| Thermal correction to Enthalpy= | 0.780792                    |

Thermal correction to Gibbs Free Energy= 0.657671

E(solv) = -2485.29980348 A.U.

|   |             |             |             |
|---|-------------|-------------|-------------|
| C | 0.72158700  | -2.92925500 | -0.61839000 |
| C | -0.67220800 | -2.88784000 | -0.69483900 |
| C | -1.47995300 | -4.01747500 | -0.67520800 |
| C | -0.82589500 | -5.23916000 | -0.57835200 |
| C | 0.57408700  | -5.31583500 | -0.51173200 |
| C | 1.36171400  | -4.17287600 | -0.53931600 |
| C | 1.17619800  | -1.53398000 | -0.72667500 |
| C | -0.03024500 | -0.75956000 | -0.81753300 |
| H | -2.55656200 | -3.92965500 | -0.77847700 |
| H | -1.41049600 | -6.15414800 | -0.57048900 |
| H | 1.05029700  | -6.28844700 | -0.44813400 |
| H | 2.44218700  | -4.24417400 | -0.49953200 |
| O | -1.14336100 | -1.62120500 | -0.79601200 |
| C | -0.32184300 | 0.60105100  | -0.91350200 |
| N | 2.36751000  | -0.99009100 | -0.77929500 |
| C | 0.74090200  | 1.61519400  | -0.64920800 |
| C | 1.66264000  | 1.49506500  | 0.39698300  |
| C | 0.84952600  | 2.70998200  | -1.51142800 |
| C | 2.66786700  | 2.43636700  | 0.57165200  |
| H | 1.61977700  | 0.63209900  | 1.05414100  |
| C | 1.85187000  | 3.65878600  | -1.33691600 |
| H | 0.14757400  | 2.80254900  | -2.33532500 |
| C | 2.76505200  | 3.52314400  | -0.29626800 |
| H | 3.39916400  | 2.30206300  | 1.36424300  |
| H | 1.92356800  | 4.49808900  | -2.02202700 |
| H | 3.55854700  | 4.25363100  | -0.16547200 |
| S | 3.71343200  | -1.81495200 | -0.36429300 |
| O | 4.26578300  | -2.55131100 | -1.50090300 |
| O | 3.54093800  | -2.54239000 | 0.89876300  |
| C | 4.75945400  | -0.41439900 | -0.02493600 |
| C | 5.03146100  | 0.50055000  | -1.03944600 |
| C | 5.26772200  | -0.24317200 | 1.25424700  |
| C | 5.82240000  | 1.60380400  | -0.75601300 |
| H | 4.60344300  | 0.35415900  | -2.02633500 |
| C | 6.06512800  | 0.86941200  | 1.52164300  |
| H | 5.03274200  | -0.97490600 | 2.02062900  |
| C | 6.35018700  | 1.80407800  | 0.52642900  |
| H | 6.02783300  | 2.33237400  | -1.53662600 |
| H | 6.47090000  | 1.01210200  | 2.52009700  |
| C | 7.21838600  | 3.00314300  | 0.81082500  |
| H | 7.37368700  | 3.13671600  | 1.88453400  |
| H | 8.20216600  | 2.89303000  | 0.34172800  |
| H | 6.76940500  | 3.91922700  | 0.41400300  |

|   |             |             |             |
|---|-------------|-------------|-------------|
| C | -1.62266500 | 1.00292400  | -1.31892000 |
| C | -2.15354300 | 2.27200700  | -0.87393200 |
| O | -1.79560700 | 2.90050300  | 0.12200100  |
| O | -3.20218500 | 2.71017500  | -1.62144000 |
| C | -4.91983500 | 4.24771900  | -2.15661800 |
| C | -3.83105800 | 3.90472300  | -1.16180500 |
| H | -5.44073100 | 5.15872600  | -1.84945300 |
| H | -4.49234700 | 4.40953000  | -3.14938000 |
| H | -5.64859200 | 3.43543100  | -2.22497200 |
| H | -4.23974200 | 3.73615600  | -0.15805100 |
| H | -3.08405300 | 4.69940800  | -1.07775800 |
| H | -2.16981400 | 0.27311600  | 0.54706800  |
| C | -2.37705900 | 0.20762400  | -2.36141900 |
| C | -3.40761900 | -0.81310500 | -1.93018700 |
| O | -3.65930600 | -1.82293300 | -2.53589200 |
| O | -4.12147100 | -0.45466600 | -0.82124100 |
| C | -6.16082800 | -0.65644100 | 0.44183400  |
| C | -5.25398800 | -1.30687100 | -0.58294400 |
| H | -2.91942200 | 0.91001100  | -3.00569000 |
| H | -1.68422800 | -0.34648800 | -2.99921100 |
| H | -5.71347600 | -0.63135200 | 1.44099700  |
| H | -6.40298900 | 0.36738100  | 0.14188400  |
| H | -7.09366200 | -1.22219000 | 0.51476900  |
| H | -5.77789500 | -1.45820700 | -1.52962300 |
| H | -4.90157700 | -2.29098000 | -0.25296900 |
| N | -2.64309800 | 0.06651300  | 4.07812000  |
| C | -3.73452800 | 0.82795200  | 3.46542700  |
| C | -2.62932200 | -1.21110500 | 1.95494000  |
| C | -1.04072800 | 0.62852100  | 2.26520600  |
| C | -1.36996600 | 0.72973700  | 3.77621200  |
| C | -2.62710600 | -1.27918500 | 3.50296700  |
| C | -3.41571200 | 1.12649000  | 1.98255000  |
| N | -2.30493000 | 0.20017100  | 1.58036800  |
| H | -4.65481300 | 0.24263100  | 3.56693500  |
| H | -3.87378100 | 1.76287600  | 4.01493400  |
| H | -3.60295400 | -1.43474200 | 1.51512900  |
| H | -1.88278000 | -1.85704000 | 1.48968000  |
| H | -0.29361300 | -0.13762100 | 2.04220600  |
| H | -0.73736300 | 1.57203300  | 1.80362600  |
| H | -0.57728100 | 0.26423800  | 4.36757900  |
| H | -1.44912900 | 1.77509200  | 4.08795200  |
| H | -1.73403900 | -1.79535100 | 3.86638700  |
| H | -3.50063100 | -1.83187400 | 3.85983200  |
| H | -4.24507100 | 0.94866200  | 1.29656300  |
| H | -3.03633400 | 2.13547600  | 1.81477200  |

**N-INT8-B**

Zero-point correction= 0.736625 (Hartree/Particle)  
Thermal correction to Energy= 0.780170  
Thermal correction to Enthalpy= 0.781114  
Thermal correction to Gibbs Free Energy= 0.655578

E(solv) = -2485.28945871 A.U.

|   |             |             |             |
|---|-------------|-------------|-------------|
| C | -0.96245400 | 3.13399500  | 0.45375100  |
| C | 0.37476600  | 3.38628800  | 0.77072700  |
| C | 0.91891600  | 4.66041800  | 0.87141000  |
| C | 0.05499600  | 5.72421900  | 0.65092500  |
| C | -1.29438100 | 5.50621500  | 0.33632300  |
| C | -1.81730100 | 4.22381800  | 0.23651800  |
| C | -1.11045000 | 1.66592000  | 0.46357300  |
| C | 0.18968000  | 1.18261100  | 0.70873600  |
| H | 1.96498300  | 4.80304000  | 1.12112800  |
| H | 0.43119100  | 6.74018800  | 0.72626800  |
| H | -1.94546200 | 6.35755300  | 0.16656000  |
| H | -2.85812500 | 4.07266700  | -0.01971300 |
| O | 1.07718600  | 2.24107700  | 0.94986300  |
| C | 0.70973600  | -0.13260800 | 0.93644200  |
| N | -2.17732400 | 0.86691200  | 0.39914400  |
| C | 1.53803300  | -0.31961700 | 2.18697100  |
| C | 2.56482700  | 0.52982600  | 2.62297700  |
| C | 1.16832400  | -1.37014700 | 3.04610300  |
| C | 3.23519900  | 0.29380400  | 3.82403500  |
| H | 2.81681400  | 1.41714700  | 2.05839200  |
| C | 1.82849700  | -1.60039700 | 4.24404000  |
| H | 0.32772100  | -2.00071700 | 2.77187300  |
| C | 2.88178800  | -0.77695200 | 4.63526100  |
| H | 4.02461300  | 0.97350500  | 4.13275300  |
| H | 1.50875200  | -2.41910100 | 4.88133400  |
| H | 3.39865600  | -0.95171300 | 5.57366300  |
| S | -3.64772400 | 1.50452900  | 0.13079600  |
| O | -3.73211800 | 2.20261200  | -1.15703800 |
| O | -4.16107000 | 2.22101300  | 1.30449100  |
| C | -4.58697200 | -0.00227000 | -0.02249500 |
| C | -4.47273300 | -0.75801000 | -1.18793800 |
| C | -5.43004800 | -0.38756500 | 1.00835400  |
| C | -5.21321700 | -1.92717700 | -1.30212000 |
| H | -3.80764600 | -0.42029200 | -1.97918300 |
| C | -6.16769800 | -1.56238000 | 0.87507400  |
| H | -5.49897100 | 0.23550000  | 1.89431000  |
| C | -6.06960600 | -2.34444100 | -0.27538600 |
| H | -5.13647700 | -2.52821900 | -2.20571700 |



|   |             |             |             |
|---|-------------|-------------|-------------|
| H | -6.83153800 | -1.87480200 | 1.67744900  |
| C | -6.88018600 | -3.60659000 | -0.42945000 |
| H | -7.38150100 | -3.87295200 | 0.50474900  |
| H | -7.64966400 | -3.48692200 | -1.19994100 |
| H | -6.24857300 | -4.44930000 | -0.72853600 |
| C | 0.35319100  | -1.22954800 | 0.17074100  |
| C | 1.02254100  | -2.52450800 | 0.38128400  |
| O | 2.21919300  | -2.67770700 | 0.63107800  |
| O | 0.22344300  | -3.58362100 | 0.20242900  |
| C | -0.24314100 | -5.90564300 | 0.09339900  |
| C | 0.84349600  | -4.87301800 | 0.29988300  |
| H | 0.17855300  | -6.91158500 | 0.16697500  |
| H | -1.02174000 | -5.79680100 | 0.85204500  |
| H | -0.70275000 | -5.79020300 | -0.89130300 |
| H | 1.63214000  | -4.94635300 | -0.45639800 |
| H | 1.31705600  | -4.96152300 | 1.28199000  |
| H | 2.83951100  | -0.99874000 | 0.12462900  |
| C | -0.70214200 | -1.21936100 | -0.90473700 |
| C | -0.58121800 | -0.21228900 | -2.02942400 |
| O | -1.52681600 | 0.28169000  | -2.58147800 |
| O | 0.69191300  | -0.01177300 | -2.48419100 |
| C | 2.12700900  | 0.74262000  | -4.24939200 |
| C | 0.74227400  | 0.83361300  | -3.64671500 |
| H | -0.72328500 | -2.19725500 | -1.39760000 |
| H | -1.69300200 | -1.02655200 | -0.48064800 |
| H | 2.88971600  | 1.12754800  | -3.56660300 |
| H | 2.37101900  | -0.29422600 | -4.50405400 |
| H | 2.17082200  | 1.33771200  | -5.16553700 |
| H | -0.01861100 | 0.49981700  | -4.35565500 |
| H | 0.48674300  | 1.85521400  | -3.34904700 |
| N | 5.67037400  | 0.09791800  | -1.71824800 |
| C | 4.92688800  | -0.89804800 | -2.48964600 |
| C | 3.49083800  | 0.81578700  | -0.75312600 |
| C | 4.86655000  | -0.86674600 | 0.41945000  |
| C | 6.09503200  | -0.49600200 | -0.45016100 |
| C | 4.80757100  | 1.25062100  | -1.45036600 |
| C | 3.71784300  | -1.43429000 | -1.67880600 |
| N | 3.64651800  | -0.63297600 | -0.41451000 |
| H | 4.59328300  | -0.43255000 | -3.42049700 |
| H | 5.60556100  | -1.71472800 | -2.75049500 |
| H | 2.59648900  | 0.89006700  | -1.37736700 |
| H | 3.29485900  | 1.35995200  | 0.16884000  |
| H | 4.75965200  | -0.24572600 | 1.31148800  |
| H | 4.83570100  | -1.91424900 | 0.72675900  |
| H | 6.73372500  | 0.21880200  | 0.07542200  |

|   |            |             |             |
|---|------------|-------------|-------------|
| H | 6.69821800 | -1.38060300 | -0.67259400 |
| H | 5.36415400 | 1.95015000  | -0.82032500 |
| H | 4.59755700 | 1.75814800  | -2.39561900 |
| H | 2.75453400 | -1.29838300 | -2.17964300 |
| H | 3.81940900 | -2.47815500 | -1.37610900 |

**N-INT8-C**

|                                          |                             |
|------------------------------------------|-----------------------------|
| Zero-point correction=                   | 0.735809 (Hartree/Particle) |
| Thermal correction to Energy=            | 0.779666                    |
| Thermal correction to Enthalpy=          | 0.780611                    |
| Thermal correction to Gibbs Free Energy= | 0.655518                    |

E(solv) = -2485.28395428 A.U.

|   |             |             |             |
|---|-------------|-------------|-------------|
| C | -0.54020800 | 2.99006800  | 1.17446600  |
| C | 0.84071200  | 3.13057400  | 1.38335000  |
| C | 1.47657300  | 4.34699100  | 1.58633900  |
| C | 0.67519200  | 5.48100300  | 1.56119200  |
| C | -0.70807500 | 5.37714700  | 1.35062900  |
| C | -1.33088500 | 4.15122000  | 1.16248300  |
| C | -0.73894900 | 1.56324900  | 1.01952800  |
| C | 0.48894100  | 0.97354800  | 1.10202800  |
| H | 2.54798500  | 4.39363400  | 1.74947300  |
| H | 1.12538000  | 6.45764200  | 1.70828300  |
| H | -1.31096600 | 6.27949100  | 1.34003400  |
| H | -2.40257400 | 4.09959100  | 1.01775500  |
| O | 1.46682900  | 1.92660900  | 1.33325800  |
| C | 0.89125100  | -0.42155700 | 1.00371300  |
| N | -1.92237800 | 0.81403600  | 0.83665000  |
| C | 1.78396000  | -0.95507500 | 2.08018500  |
| C | 2.98016000  | -0.30918600 | 2.43329300  |
| C | 1.44677400  | -2.11680200 | 2.79417800  |
| C | 3.81805100  | -0.82344600 | 3.42006200  |
| H | 3.24001300  | 0.62726600  | 1.95199700  |
| C | 2.28823500  | -2.63761400 | 3.77073200  |
| H | 0.49506100  | -2.60220200 | 2.59484800  |
| C | 3.48525900  | -1.99884900 | 4.08534600  |
| H | 4.73325200  | -0.29513900 | 3.67262500  |
| H | 1.99536500  | -3.53682400 | 4.30513400  |
| H | 4.13909700  | -2.40105400 | 4.85279100  |
| S | -3.30352100 | 1.58783700  | 0.27000500  |
| O | -3.01948800 | 2.30726800  | -0.96789400 |
| O | -3.89610900 | 2.31763800  | 1.38254800  |
| C | -4.29565900 | 0.16712500  | -0.09958500 |
| C | -4.10393800 | -0.48752700 | -1.31486600 |
| C | -5.24472500 | -0.25007400 | 0.82519200  |
| C | -4.88925300 | -1.59980300 | -1.58994200 |

|   |             |             |             |
|---|-------------|-------------|-------------|
| H | -3.35873900 | -0.13446900 | -2.02610700 |
| C | -6.02345100 | -1.36251600 | 0.52164800  |
| H | -5.36528600 | 0.29606200  | 1.75534200  |
| C | -5.85631300 | -2.04836400 | -0.68347700 |
| H | -4.75421100 | -2.12489700 | -2.53215000 |
| H | -6.77373600 | -1.70272800 | 1.23019000  |
| C | -6.71263900 | -3.24223600 | -1.01986500 |
| H | -7.31381300 | -3.55576800 | -0.16288000 |
| H | -7.39584100 | -3.00953100 | -1.84362400 |
| H | -6.09802100 | -4.09076100 | -1.33581200 |
| C | 0.33205100  | -1.26733300 | 0.04692900  |
| C | 0.75286700  | -2.71245600 | 0.09397900  |
| O | 1.87894400  | -3.08227300 | -0.18493300 |
| O | -0.23419800 | -3.55513000 | 0.39108300  |
| C | -1.13547400 | -5.71964900 | 0.75517800  |
| C | 0.11877000  | -4.94857700 | 0.40806700  |
| H | -0.91818100 | -6.79048600 | 0.78969100  |
| H | -1.51897500 | -5.40922100 | 1.73023600  |
| H | -1.91259900 | -5.54471000 | 0.00712800  |
| H | 0.51807400  | -5.22316200 | -0.57266800 |
| H | 0.91428100  | -5.09213100 | 1.14653300  |
| H | 2.41866900  | -0.78797800 | -0.40581500 |
| C | -0.47060800 | -1.06182000 | -1.10364700 |
| C | -0.61966500 | 0.07394600  | -1.97329500 |
| O | -1.40078200 | 0.12243100  | -2.91494100 |
| O | 0.24651100  | 1.11317800  | -1.73670000 |
| C | 1.05332300  | 3.31101100  | -2.22827500 |
| C | -0.08445400 | 2.33277100  | -2.42756100 |
| H | -0.94257900 | -1.94620400 | -1.51846500 |
| H | -1.75487500 | -0.03289700 | 0.27290000  |
| H | 1.23493100  | 3.49469000  | -1.16470000 |
| H | 1.97722400  | 2.94538800  | -2.69270500 |
| H | 0.80216800  | 4.26730300  | -2.69585600 |
| H | -0.24453800 | 2.10928500  | -3.48499400 |
| H | -1.02213700 | 2.71628100  | -2.01444300 |
| N | 5.04313300  | -0.14195100 | -2.71615700 |
| C | 3.96514600  | -0.88466100 | -3.37546800 |
| C | 3.52011100  | 0.85217400  | -1.03072900 |
| C | 4.39323400  | -1.41925400 | -0.69026500 |
| C | 5.55400400  | -0.93963500 | -1.59747800 |
| C | 4.50223900  | 1.11867700  | -2.19792000 |
| C | 2.73002500  | -0.98367000 | -2.44834200 |
| N | 3.19503200  | -0.60890600 | -1.07113600 |
| H | 3.69908100  | -0.37675800 | -4.30622800 |
| H | 4.34568100  | -1.87739000 | -3.63359000 |

|   |            |             |             |
|---|------------|-------------|-------------|
| H | 2.57201200 | 1.38973600  | -1.09996400 |
| H | 3.96475800 | 1.04888800  | -0.05300400 |
| H | 4.56829200 | -1.25723700 | 0.37626900  |
| H | 4.11756100 | -2.46394500 | -0.83849800 |
| H | 6.26098600 | -0.32175400 | -1.03583200 |
| H | 6.10389600 | -1.79724900 | -1.99466200 |
| H | 5.32854000 | 1.75154800  | -1.86348100 |
| H | 3.99879500 | 1.63520500  | -3.02053000 |
| H | 1.93932500 | -0.27437100 | -2.70240100 |
| H | 2.30332500 | -1.98496800 | -2.37457800 |

### N-INT8-D

|                                          |                             |
|------------------------------------------|-----------------------------|
| Zero-point correction=                   | 0.735041 (Hartree/Particle) |
| Thermal correction to Energy=            | 0.778614                    |
| Thermal correction to Enthalpy=          | 0.779558                    |
| Thermal correction to Gibbs Free Energy= | 0.656279                    |

E(solv) = -2485.30514960 A.U.

|   |             |             |             |
|---|-------------|-------------|-------------|
| C | -0.56485000 | 1.57064000  | -0.85919500 |
| C | -1.36631600 | 2.64273900  | -0.37208100 |
| O | -1.09166300 | 3.51780200  | 0.43764900  |
| O | -2.65279100 | 2.59364600  | -0.91379200 |
| C | -4.72157500 | 3.62616500  | -1.43194100 |
| C | -3.50210500 | 3.66923800  | -0.53272500 |
| H | -1.01420800 | 0.91866100  | -1.60367400 |
| H | -5.41455400 | 4.43321100  | -1.17850600 |
| H | -4.42507900 | 3.73363500  | -2.47841500 |
| H | -5.25531300 | 2.67459300  | -1.32910100 |
| H | -3.77565300 | 3.57429900  | 0.52801700  |
| H | -2.96291100 | 4.61499600  | -0.63342400 |
| C | -0.08567800 | -2.73502200 | -1.61684200 |
| C | 0.93938000  | -2.66948200 | -2.57152500 |
| C | 1.17140300  | -3.66360200 | -3.50961500 |
| C | 0.32245400  | -4.76454000 | -3.47272800 |
| C | -0.70464000 | -4.86106200 | -2.52000900 |
| C | -0.91712500 | -3.85988500 | -1.58136700 |
| C | 0.05815700  | -1.51960400 | -0.86487300 |
| C | 1.10039100  | -0.80648100 | -1.40356600 |
| H | 1.97503600  | -3.57220200 | -4.23155900 |
| H | 0.46200600  | -5.56681600 | -4.19003400 |
| H | -1.33603300 | -5.74409700 | -2.51142300 |
| H | -1.68087200 | -3.95500900 | -0.81580900 |
| O | 1.64506700  | -1.51265800 | -2.44716600 |
| C | 1.67657600  | 0.47282000  | -1.03690700 |
| N | -0.72940100 | -1.07674800 | 0.22684900  |
| C | 3.15328400  | 0.55371600  | -1.02836600 |

|   |             |             |             |
|---|-------------|-------------|-------------|
| C | 3.83997800  | 1.71593200  | -1.40525200 |
| C | 3.91043400  | -0.55986900 | -0.63160500 |
| C | 5.22929700  | 1.77429600  | -1.35050000 |
| H | 3.27760100  | 2.57512600  | -1.75948000 |
| C | 5.29788900  | -0.50803700 | -0.59634600 |
| H | 3.39404200  | -1.46776000 | -0.32627400 |
| C | 5.96689600  | 0.66414500  | -0.94840800 |
| H | 5.73862600  | 2.68797500  | -1.64325100 |
| H | 5.85975800  | -1.38437500 | -0.28283500 |
| H | 7.05166100  | 0.70676200  | -0.91997900 |
| S | -0.46599200 | -1.79555200 | 1.73609200  |
| O | -0.70045800 | -3.22244300 | 1.57801700  |
| O | -1.34394900 | -1.01711400 | 2.61116600  |
| C | 1.22876500  | -1.50743700 | 2.12509900  |
| C | 2.08797100  | -2.59088000 | 2.26485500  |
| C | 1.66967200  | -0.18913700 | 2.23760900  |
| C | 3.42720300  | -2.33782000 | 2.54937800  |
| H | 1.70736500  | -3.60049100 | 2.14992000  |
| C | 3.01171100  | 0.03817000  | 2.49838600  |
| H | 0.99680700  | 0.65408800  | 2.10519200  |
| C | 3.90291300  | -1.02942000 | 2.66610200  |
| H | 4.11610400  | -3.16996600 | 2.66556600  |
| H | 3.36706500  | 1.06373700  | 2.53559000  |
| C | 5.35702900  | -0.75106700 | 2.93832400  |
| H | 5.76085200  | -0.07373500 | 2.17871200  |
| H | 5.48533900  | -0.27118000 | 3.91427400  |
| H | 5.94853100  | -1.67017400 | 2.93109000  |
| C | 0.84277100  | 1.51753900  | -0.67670600 |
| C | 1.45598900  | 2.70695800  | 0.02782100  |
| O | 1.93328200  | 2.67211700  | 1.13740600  |
| O | 1.39357300  | 3.81106100  | -0.72139100 |
| C | 1.24314400  | 6.16212800  | -0.93440900 |
| C | 1.66930200  | 5.03180800  | -0.02365800 |
| H | 1.43242500  | 7.12673200  | -0.45520000 |
| H | 1.79074900  | 6.12861800  | -1.88018300 |
| H | 0.17401500  | 6.07803300  | -1.14620600 |
| H | 1.09809800  | 5.02205700  | 0.90830700  |
| H | 2.73608800  | 5.07024800  | 0.22159100  |
| H | -0.67713400 | -0.03476200 | 0.30186900  |
| N | -5.99354600 | -0.31262300 | 0.71912800  |
| C | -5.65591700 | -0.37074000 | -0.70438100 |
| C | -4.13143800 | -1.91680400 | 1.04044300  |
| C | -3.73178400 | 0.48164300  | 1.36453900  |
| C | -5.25031800 | 0.78625500  | 1.34486800  |
| C | -5.61064900 | -1.57470500 | 1.35468800  |

|   |             |             |             |
|---|-------------|-------------|-------------|
| C | -4.11794800 | -0.39499700 | -0.89635400 |
| N | -3.52198900 | -0.68702600 | 0.44673800  |
| H | -6.11981100 | -1.26636400 | -1.12823300 |
| H | -6.08799000 | 0.49757200  | -1.20915700 |
| H | -4.02425600 | -2.71288300 | 0.29906400  |
| H | -3.54011900 | -2.17435900 | 1.92155400  |
| H | -3.35303000 | 0.17822400  | 2.34135600  |
| H | -3.12143600 | 1.30353100  | 0.98480800  |
| H | -5.62265000 | 0.93224300  | 2.36224800  |
| H | -5.45638500 | 1.70015300  | 0.77949500  |
| H | -5.76364300 | -1.47305600 | 2.43274100  |
| H | -6.27131700 | -2.36892900 | 0.99690000  |
| H | -3.77710300 | -1.17628400 | -1.58107700 |
| H | -3.70633600 | 0.56842300  | -1.21332100 |
| H | -2.49399500 | -0.85775200 | 0.32073700  |

### N-INT9

|                                          |                             |
|------------------------------------------|-----------------------------|
| Zero-point correction=                   | 0.401417 (Hartree/Particle) |
| Thermal correction to Energy=            | 0.428013                    |
| Thermal correction to Enthalpy=          | 0.428957                    |
| Thermal correction to Gibbs Free Energy= | 0.341030                    |

E(solv) = -1319.84583262 A.U.

|   |             |             |             |
|---|-------------|-------------|-------------|
| C | -0.11170800 | -2.44489700 | 0.21649400  |
| C | -1.29694500 | -2.38914600 | -0.67841900 |
| O | -1.41193300 | -1.69010700 | -1.65614100 |
| O | -2.23057300 | -3.25699200 | -0.26612400 |
| C | -4.39371000 | -4.22411500 | -0.36975200 |
| C | -3.45584200 | -3.22193400 | -1.00663800 |
| H | 0.06662500  | -3.36895300 | 0.75773600  |
| H | -5.35032300 | -4.23185000 | -0.89892500 |
| H | -3.96636200 | -5.22918600 | -0.40906600 |
| H | -4.57497200 | -3.96720100 | 0.67686000  |
| H | -3.85217800 | -2.20202000 | -0.97112000 |
| H | -3.24577300 | -3.45878300 | -2.05410900 |
| C | -2.32452200 | 1.92870100  | 0.64704700  |
| C | -1.49697500 | 2.70335800  | -0.15796800 |
| C | -1.79794800 | 4.01369600  | -0.49735000 |
| C | -2.98469200 | 4.53300500  | 0.01433300  |
| C | -3.83328900 | 3.77186100  | 0.82866300  |
| C | -3.50923600 | 2.45745300  | 1.14836200  |
| C | -1.69241500 | 0.60125700  | 0.74511800  |
| C | -0.41003400 | 0.76151900  | -0.00635100 |
| H | -1.13650700 | 4.59319700  | -1.13072600 |
| H | -3.25802200 | 5.55564900  | -0.22628100 |
| H | -4.74852200 | 4.21245200  | 1.20871200  |

|   |             |             |             |
|---|-------------|-------------|-------------|
| H | -4.16412300 | 1.85979200  | 1.77724000  |
| O | -0.38073300 | 2.03494200  | -0.56139900 |
| C | 0.63176700  | -0.06220600 | -0.19840500 |
| N | -2.10404000 | -0.48126300 | 1.28056700  |
| C | 1.80514700  | 0.32924800  | -1.02410400 |
| C | 2.27575600  | -0.57335300 | -1.98162200 |
| C | 2.47239000  | 1.54540300  | -0.84387800 |
| C | 3.38767200  | -0.26040000 | -2.75868500 |
| H | 1.74988400  | -1.51346100 | -2.12440200 |
| C | 3.58749300  | 1.85147900  | -1.61479400 |
| H | 2.11886000  | 2.23795100  | -0.08718800 |
| C | 4.04748800  | 0.95089700  | -2.57524000 |
| H | 3.73739900  | -0.96480700 | -3.50702300 |
| H | 4.10273000  | 2.79552400  | -1.46429300 |
| H | 4.91822900  | 1.19405100  | -3.17642400 |
| C | 0.71201300  | -1.41242400 | 0.41362200  |
| C | 1.86772600  | -1.66593600 | 1.34729600  |
| O | 2.17877800  | -2.75205400 | 1.77307900  |
| O | 2.50640300  | -0.53342400 | 1.65944700  |
| C | 4.32959300  | 0.68099000  | 2.55386300  |
| C | 3.66947700  | -0.67900500 | 2.48485900  |
| H | 5.23377700  | 0.62978100  | 3.16617400  |
| H | 4.60124000  | 1.01892100  | 1.55025100  |
| H | 3.65086000  | 1.41549200  | 2.99508700  |
| H | 3.35936000  | -1.04460300 | 3.46866600  |
| H | 4.32273200  | -1.43446700 | 2.03915800  |
| H | -3.00738800 | -0.32026000 | 1.73609000  |

### N-TS5

|                                          |                             |
|------------------------------------------|-----------------------------|
| Zero-point correction=                   | 0.647288 (Hartree/Particle) |
| Thermal correction to Energy=            | 0.685726                    |
| Thermal correction to Enthalpy=          | 0.686670                    |
| Thermal correction to Gibbs Free Energy= | 0.578864                    |
| E(solv) = -2442.82874889                 | A.U.                        |

|                     |            |             |             |
|---------------------|------------|-------------|-------------|
| Imaginary Frequency | 1194.99i   |             |             |
| C                   | 3.23719600 | -0.77198800 | -0.80658900 |
| C                   | 3.38454500 | 0.45177500  | -1.47624100 |
| C                   | 4.47092300 | 0.77024800  | -2.27802000 |
| C                   | 5.47154200 | -0.19123700 | -2.39278700 |
| C                   | 5.36431900 | -1.41774400 | -1.71767900 |
| C                   | 4.26042200 | -1.72335400 | -0.92824200 |
| C                   | 1.98308400 | -0.67203500 | -0.07343900 |
| C                   | 1.50754300 | 0.59383000  | -0.32740400 |
| H                   | 4.52431000 | 1.73229800  | -2.77770700 |
| H                   | 6.34245700 | 0.01155300  | -3.01152100 |

|   |             |             |             |
|---|-------------|-------------|-------------|
| H | 6.16037100  | -2.15146300 | -1.82352200 |
| H | 4.15532000  | -2.68276000 | -0.43568200 |
| O | 2.35038500  | 1.27113900  | -1.19656900 |
| C | 0.29643500  | 1.39696800  | 0.01072900  |
| H | -0.45839100 | 1.11824900  | -1.03878600 |
| N | 1.44777000  | -1.53904200 | 0.87764600  |
| C | 0.63299300  | 2.88531700  | -0.10136000 |
| C | 1.48050000  | 3.49519000  | 0.83457000  |
| C | 0.10677700  | 3.66277000  | -1.13851400 |
| C | 1.78448000  | 4.85078000  | 0.75631900  |
| H | 1.91089000  | 2.88036000  | 1.62449500  |
| C | 0.41123600  | 5.02362900  | -1.21066200 |
| H | -0.58052400 | 3.20779100  | -1.85973900 |
| C | 1.24600300  | 5.62373900  | -0.27183700 |
| H | 2.44727400  | 5.30263100  | 1.49168700  |
| H | -0.01754900 | 5.61837700  | -2.01395500 |
| H | 1.47782500  | 6.68490300  | -0.33826800 |
| S | 1.16563600  | -3.06027500 | 0.56032700  |
| O | 0.90631200  | -3.75316300 | 1.83450100  |
| O | 2.14930900  | -3.70310400 | -0.33765900 |
| C | -0.38542700 | -3.11482700 | -0.34506100 |
| C | -1.48186500 | -3.79708500 | 0.17344300  |
| C | -0.51306800 | -2.35546900 | -1.50773500 |
| C | -2.71159800 | -3.71320700 | -0.48075600 |
| H | -1.35906800 | -4.35145500 | 1.09873500  |
| C | -1.74562900 | -2.26141200 | -2.14059400 |
| H | 0.32036400  | -1.76551800 | -1.87731700 |
| C | -2.85993700 | -2.93928400 | -1.63538000 |
| H | -3.57966100 | -4.22741300 | -0.06802000 |
| H | -1.87735100 | -1.55047700 | -2.94953400 |
| C | -4.19141600 | -2.75714000 | -2.31969300 |
| H | -4.29028400 | -3.42278600 | -3.18746700 |
| H | -5.02400600 | -2.97338000 | -1.63970200 |
| H | -4.26167200 | -1.71957200 | -2.66807500 |
| N | -4.48565100 | 0.68958300  | 0.93193000  |
| N | -1.92524100 | 0.93475200  | 1.23560400  |
| C | -3.78715700 | -0.51095100 | 0.44695900  |
| H | -4.10864800 | -1.36864400 | 1.05004200  |
| H | -4.06479300 | -0.66235600 | -0.59840400 |
| C | -3.99259700 | 1.83516400  | 0.16202400  |
| H | -4.08048100 | 1.61897400  | -0.90777000 |
| H | -4.60079600 | 2.71464300  | 0.40513200  |
| C | -4.15564500 | 0.90937200  | 2.33058800  |
| H | -4.58906200 | 1.86923400  | 2.63633700  |
| H | -4.61830400 | 0.12347800  | 2.93853100  |



|   |             |             |             |
|---|-------------|-------------|-------------|
| C | -2.62484100 | 0.89491400  | 2.57035700  |
| H | -2.27623600 | 1.76362000  | 3.13937900  |
| H | -2.30160900 | -0.01015400 | 3.07183400  |
| C | -2.24812600 | -0.34654500 | 0.49372700  |
| H | -1.73955800 | -1.14987000 | 1.03067600  |
| H | -1.83239300 | -0.24114300 | -0.51276800 |
| C | -2.51284200 | 2.12267600  | 0.49882400  |
| H | -1.96777600 | 2.30787900  | -0.42421600 |
| H | -2.38017500 | 2.97491900  | 1.17609600  |
| C | -0.40239900 | 1.15080800  | 1.37035700  |
| H | -0.36508700 | 2.10040300  | 1.92433800  |
| C | 0.20408900  | 0.16833800  | 2.38580900  |
| O | 1.45609200  | 0.55547500  | 2.64816600  |
| O | -0.38118400 | -0.67870000 | 3.01848600  |
| C | 2.22846800  | -0.36508500 | 3.43450500  |
| H | 2.07551700  | -0.11891600 | 4.49404900  |
| H | 1.86583200  | -1.37389000 | 3.22763800  |
| C | 3.67263200  | -0.20528300 | 3.01035500  |
| H | 4.31416900  | -0.84458000 | 3.62621100  |
| H | 3.77404500  | -0.50597400 | 1.96430400  |
| H | 4.00524200  | 0.83254100  | 3.11798800  |
| C | -2.27749400 | 1.17892300  | -2.42296700 |
| O | -2.43729700 | 2.44118100  | -2.46588400 |
| O | -3.23801300 | 0.34836800  | -2.55464300 |
| O | -1.05902900 | 0.69318900  | -2.14491600 |

### N-TS6-A

|                                          |                             |
|------------------------------------------|-----------------------------|
| Zero-point correction=                   | 0.543231 (Hartree/Particle) |
| Thermal correction to Energy=            | 0.581476                    |
| Thermal correction to Enthalpy=          | 0.582420                    |
| Thermal correction to Gibbs Free Energy= | 0.467585                    |

E(solv) = -4714.26694341 A.U.

Imaginary Frequency 533.53i

|   |             |            |             |
|---|-------------|------------|-------------|
| C | -1.32650200 | 3.30150000 | -0.56362600 |
| C | -0.11682100 | 4.00034600 | -0.49985300 |
| C | 0.01517800  | 5.33766700 | -0.85945100 |
| C | -1.13254400 | 5.98039400 | -1.29793300 |
| C | -2.36111800 | 5.30473000 | -1.37799200 |
| C | -2.47401400 | 3.97068000 | -1.01668100 |
| C | -1.02404600 | 1.93919200 | -0.10554100 |
| C | 0.39117200  | 1.95123200 | 0.16295600  |
| H | 0.97617300  | 5.83463400 | -0.79118500 |
| H | -1.07825300 | 7.02613600 | -1.58684300 |
| H | -3.23900000 | 5.83564400 | -1.73137400 |
| H | -3.42455700 | 3.45911300 | -1.09650400 |

|    |             |             |             |
|----|-------------|-------------|-------------|
| O  | 0.89851500  | 3.23524600  | -0.05913400 |
| C  | 1.23084300  | 1.04370200  | 0.79126300  |
| N  | -1.79133600 | 0.89607100  | 0.14383800  |
| C  | 2.44912900  | 1.58297700  | 1.47371800  |
| C  | 3.44457200  | 2.26513500  | 0.76597000  |
| C  | 2.62807300  | 1.35139700  | 2.84056600  |
| C  | 4.59276000  | 2.70505300  | 1.41588000  |
| H  | 3.32041400  | 2.43218600  | -0.29890400 |
| C  | 3.77074600  | 1.80592700  | 3.49177800  |
| H  | 1.85977100  | 0.82030800  | 3.39513600  |
| C  | 4.75754000  | 2.48226200  | 2.78071400  |
| H  | 5.36508800  | 3.21674100  | 0.84978400  |
| H  | 3.89147200  | 1.62343700  | 4.55541500  |
| H  | 5.65544500  | 2.82630000  | 3.28533500  |
| S  | -3.41472900 | 1.02074800  | 0.01716400  |
| O  | -3.85243400 | 1.18286400  | -1.37791800 |
| O  | -3.96480500 | 1.97272300  | 0.98724400  |
| C  | -3.88489400 | -0.62564100 | 0.50368000  |
| C  | -4.95681200 | -1.21344800 | -0.15703000 |
| C  | -3.23137100 | -1.28176800 | 1.54255600  |
| C  | -5.38514400 | -2.47764500 | 0.23842500  |
| H  | -5.42823100 | -0.68571200 | -0.97968800 |
| C  | -3.66454600 | -2.54633200 | 1.91600100  |
| H  | -2.36587800 | -0.82676300 | 2.01052600  |
| C  | -4.74602500 | -3.15889500 | 1.27503600  |
| H  | -6.22061400 | -2.94725900 | -0.27484200 |
| H  | -3.13800100 | -3.07716600 | 2.70487700  |
| C  | -5.18386900 | -4.54302400 | 1.68250100  |
| H  | -4.42043100 | -5.28483800 | 1.42429400  |
| H  | -5.34492700 | -4.60428200 | 2.76356900  |
| H  | -6.11352900 | -4.82917700 | 1.18318700  |
| C  | 1.07750100  | -0.36799900 | 0.86071100  |
| C  | 0.03944100  | -1.14538700 | 0.15138500  |
| O  | -0.54011100 | -2.10487200 | 0.62050100  |
| O  | -0.07163600 | -0.75858300 | -1.12879200 |
| C  | -1.38195800 | -0.50185500 | -3.08595100 |
| C  | -1.08968200 | -1.39651200 | -1.89938600 |
| H  | -2.12260500 | -0.97606100 | -3.73705700 |
| H  | -1.78937900 | 0.45379700  | -2.74595100 |
| H  | -0.47066700 | -0.32341500 | -3.66389700 |
| H  | -0.71877400 | -2.38008400 | -2.20907500 |
| H  | -1.97486700 | -1.54097100 | -1.27247800 |
| H  | 1.42110500  | -0.84420300 | 1.77587600  |
| Br | 4.75393200  | -1.71216100 | -1.58768400 |
| C  | 2.76089800  | -1.02088200 | -0.25290900 |

|   |             |             |             |
|---|-------------|-------------|-------------|
| C | 2.60319600  | -2.43343200 | 0.19461400  |
| O | 2.99140000  | -2.85839000 | 1.25737400  |
| O | 1.86727300  | -3.14473300 | -0.67471400 |
| C | 0.35100000  | -4.92102200 | -1.08419400 |
| C | 1.50428300  | -4.45025900 | -0.22421100 |
| H | 2.34101400  | -0.69394300 | -1.19049900 |
| H | 3.45250000  | -0.40872200 | 0.30161900  |
| H | -0.51509800 | -4.27792500 | -0.90816400 |
| H | 0.61856900  | -4.88343000 | -2.14419800 |
| H | 0.08549700  | -5.95144000 | -0.82750400 |
| H | 2.38046000  | -5.10277200 | -0.30708600 |
| H | 1.21712200  | -4.39155100 | 0.82862200  |

**N-TS6-B**

|                                          |                             |
|------------------------------------------|-----------------------------|
| Zero-point correction=                   | 0.542393 (Hartree/Particle) |
| Thermal correction to Energy=            | 0.581155                    |
| Thermal correction to Enthalpy=          | 0.582099                    |
| Thermal correction to Gibbs Free Energy= | 0.464708                    |

E(solv) = -4714.27967410 A.U.

Imaginary Frequency 506.13i

|   |             |             |             |
|---|-------------|-------------|-------------|
| C | 0.38396300  | 3.20708200  | -0.54106300 |
| C | -0.94768200 | 3.26061500  | -0.96775600 |
| C | -1.64567700 | 4.45398700  | -1.12089200 |
| C | -0.95477100 | 5.62260000  | -0.83006900 |
| C | 0.38228600  | 5.59691200  | -0.40319900 |
| C | 1.06383600  | 4.39733200  | -0.25402200 |
| C | 0.73515600  | 1.78358500  | -0.51127000 |
| C | -0.46243200 | 1.10728600  | -0.93573400 |
| H | -2.67750700 | 4.45386300  | -1.45428900 |
| H | -1.46239800 | 6.57714100  | -0.93571500 |
| H | 0.88974500  | 6.53041800  | -0.18320600 |
| H | 2.09297000  | 4.38276000  | 0.08450100  |
| O | -1.46785200 | 2.03784900  | -1.20655700 |
| C | -0.73777300 | -0.23236600 | -1.10361700 |
| N | 1.83949000  | 1.13919400  | -0.21327900 |
| C | 0.35262300  | -1.18875000 | -0.74427400 |
| C | 1.26197500  | -1.62259200 | -1.70733000 |
| C | 0.49199300  | -1.59892200 | 0.58146000  |
| C | 2.31716100  | -2.45313100 | -1.34622000 |
| H | 1.15155100  | -1.28513600 | -2.73442900 |
| C | 1.54397000  | -2.43812100 | 0.93662700  |
| H | -0.20392900 | -1.22085700 | 1.32653200  |
| C | 2.46027100  | -2.86332200 | -0.02192300 |
| H | 3.03849500  | -2.76984500 | -2.09492700 |
| H | 1.65988900  | -2.74523200 | 1.97231100  |

|    |             |             |             |
|----|-------------|-------------|-------------|
| H  | 3.29360100  | -3.49977400 | 0.26375100  |
| S  | 3.20439400  | 1.90295500  | 0.23295500  |
| O  | 3.06026700  | 2.62754900  | 1.50009100  |
| O  | 3.82070600  | 2.62393100  | -0.88664600 |
| C  | 4.20267400  | 0.46258700  | 0.55802000  |
| C  | 4.17866100  | -0.10861900 | 1.82472700  |
| C  | 4.96655700  | -0.08389800 | -0.46450800 |
| C  | 4.93199500  | -1.25233400 | 2.06317600  |
| H  | 3.57712500  | 0.34929100  | 2.60354400  |
| C  | 5.71485500  | -1.22904500 | -0.21059000 |
| H  | 4.97075400  | 0.39491600  | -1.43852500 |
| C  | 5.70301900  | -1.82971000 | 1.05029300  |
| H  | 4.92083600  | -1.70812700 | 3.05053500  |
| H  | 6.31818000  | -1.66523600 | -1.00334100 |
| C  | 6.48009300  | -3.09626900 | 1.30797300  |
| H  | 5.84243200  | -3.97870800 | 1.17713400  |
| H  | 7.32274200  | -3.19363800 | 0.61772400  |
| H  | 6.86936500  | -3.12341800 | 2.32992700  |
| C  | -2.02866600 | -0.66060000 | -1.51963600 |
| C  | -2.28712300 | -1.96026500 | -2.15752500 |
| O  | -3.15108500 | -2.15812300 | -2.98811200 |
| O  | -1.52136400 | -2.95788000 | -1.66615100 |
| C  | -0.70477000 | -5.16140800 | -1.57552400 |
| C  | -1.71246000 | -4.24638900 | -2.24153200 |
| H  | -0.77159400 | -6.17206200 | -1.98930700 |
| H  | 0.30783000  | -4.77639800 | -1.72657300 |
| H  | -0.89000500 | -5.20771600 | -0.49924600 |
| H  | -2.74453000 | -4.57005400 | -2.07158500 |
| H  | -1.56047600 | -4.18449900 | -3.32445400 |
| H  | -2.68325800 | 0.11295600  | -1.90915400 |
| Br | -4.56766500 | -1.87792300 | 2.11839100  |
| C  | -3.14818000 | -1.18753100 | 0.24820300  |
| C  | -2.94125300 | 0.14081700  | 0.87046300  |
| O  | -2.00576000 | 0.43469400  | 1.57838700  |
| O  | -3.89340300 | 1.00906400  | 0.49155600  |
| C  | -4.80860300 | 3.18213000  | 0.36963600  |
| C  | -3.77526500 | 2.31340700  | 1.05494500  |
| H  | -4.00462100 | -1.36773600 | -0.38234300 |
| H  | -2.46515800 | -1.98364200 | 0.49848900  |
| H  | -4.64174900 | 3.17569700  | -0.71165300 |
| H  | -5.81746900 | 2.80726200  | 0.56130900  |
| H  | -4.73850100 | 4.21259300  | 0.73072400  |
| H  | -3.94379500 | 2.24710600  | 2.13512700  |
| H  | -2.75964600 | 2.68664900  | 0.89554900  |

**N-TS6-C**

Zero-point correction= 0.542810 (Hartree/Particle)  
Thermal correction to Energy= 0.581499  
Thermal correction to Enthalpy= 0.582443  
Thermal correction to Gibbs Free Energy= 0.466143

E(solv) = -4714.27671926 A.U.

Imaginary Frequency 528.53i

|   |             |             |             |
|---|-------------|-------------|-------------|
| C | -0.70103800 | 3.32381800  | -0.30757200 |
| C | -2.06600100 | 3.22845600  | -0.60596400 |
| C | -2.93768700 | 4.31071300  | -0.53566800 |
| C | -2.39496800 | 5.52331200  | -0.13760500 |
| C | -1.03202300 | 5.64629700  | 0.17947100  |
| C | -0.17488900 | 4.55897400  | 0.09939200  |
| C | -0.16639900 | 1.96944000  | -0.48372100 |
| C | -1.30324000 | 1.17277800  | -0.86368200 |
| H | -3.98802600 | 4.18826300  | -0.77425200 |
| H | -3.03995300 | 6.39434600  | -0.06433600 |
| H | -0.64288000 | 6.60917800  | 0.49384500  |
| H | 0.87405000  | 4.66377900  | 0.34622800  |
| O | -2.44258700 | 1.97857800  | -0.93539000 |
| C | -1.43494200 | -0.17219000 | -1.14320300 |
| N | 1.03231700  | 1.44620600  | -0.34571000 |
| C | -2.82357500 | -0.63095300 | -1.46890500 |
| C | -3.75097400 | -0.73925700 | -0.42958100 |
| C | -3.22226100 | -0.90282900 | -2.77749400 |
| C | -5.05901600 | -1.13578700 | -0.69763500 |
| H | -3.43686900 | -0.50963100 | 0.58630000  |
| C | -4.53222100 | -1.28393100 | -3.04369500 |
| H | -2.49573000 | -0.83153300 | -3.58016200 |
| C | -5.45290000 | -1.40529200 | -2.00450000 |
| H | -5.76905800 | -1.22948500 | 0.11862200  |
| H | -4.83324400 | -1.49662400 | -4.06544000 |
| H | -6.47374600 | -1.71190000 | -2.21444900 |
| S | 2.30465900  | 2.38676300  | 0.07800700  |
| O | 2.19896100  | 2.79417600  | 1.48333500  |
| O | 2.57028600  | 3.45067000  | -0.89828500 |
| C | 3.60550500  | 1.18429900  | -0.08761400 |
| C | 4.70645300  | 1.49773100  | -0.87077600 |
| C | 3.50590000  | -0.03520200 | 0.58031700  |
| C | 5.73422900  | 0.56395300  | -0.99274300 |
| H | 4.73905300  | 2.45358800  | -1.38307200 |
| C | 4.53632200  | -0.95397900 | 0.43793600  |
| H | 2.62993100  | -0.26517900 | 1.18231000  |
| C | 5.66034200  | -0.66982600 | -0.34762900 |
| H | 6.60075600  | 0.79497800  | -1.60757800 |

|    |             |             |             |
|----|-------------|-------------|-------------|
| H  | 4.46307000  | -1.91511200 | 0.94118200  |
| C  | 6.75752700  | -1.69379900 | -0.49532200 |
| H  | 6.37849100  | -2.60781000 | -0.96526800 |
| H  | 7.57760600  | -1.31281100 | -1.11005900 |
| H  | 7.16698300  | -1.97644000 | 0.48015200  |
| C  | -0.35895300 | -1.09354000 | -0.98932200 |
| C  | -0.29333100 | -2.34655700 | -1.75180700 |
| O  | -1.16810600 | -2.91908400 | -2.36705900 |
| O  | 0.95783800  | -2.87418800 | -1.64017400 |
| C  | 2.57082500  | -4.56437800 | -1.97578000 |
| C  | 1.14582400  | -4.13854200 | -2.26665400 |
| H  | 2.78306000  | -5.53101600 | -2.44202900 |
| H  | 3.27563600  | -3.82353800 | -2.36326400 |
| H  | 2.72670900  | -4.65336700 | -0.89744800 |
| H  | 0.41639700  | -4.85297900 | -1.87114100 |
| H  | 0.95941000  | -4.04322300 | -3.34194500 |
| H  | 0.61489400  | -0.67104400 | -0.77110200 |
| Br | -1.34075100 | -3.38229800 | 2.89556800  |
| C  | -0.77007400 | -2.10948400 | 0.85923100  |
| C  | -0.29825000 | -0.98004600 | 1.70311900  |
| O  | 0.83534200  | -0.84613400 | 2.10037900  |
| O  | -1.27666500 | -0.09262900 | 1.92712500  |
| C  | -2.11670900 | 1.94782600  | 2.77221800  |
| C  | -0.89432300 | 1.05791900  | 2.69312400  |
| H  | -1.80812100 | -2.23086400 | 0.59701200  |
| H  | -0.04700700 | -2.87772600 | 0.63449700  |
| H  | -2.48857800 | 2.17082900  | 1.76781500  |
| H  | -2.91704000 | 1.45602100  | 3.33265400  |
| H  | -1.86577400 | 2.89186100  | 3.26412700  |
| H  | -0.56223800 | 0.72234600  | 3.68054500  |
| H  | -0.04769800 | 1.55322200  | 2.20614400  |

#### N-TS6-D

|                                          |                             |
|------------------------------------------|-----------------------------|
| Zero-point correction=                   | 0.543669 (Hartree/Particle) |
| Thermal correction to Energy=            | 0.581732                    |
| Thermal correction to Enthalpy=          | 0.582676                    |
| Thermal correction to Gibbs Free Energy= | 0.469030                    |

E(solv) = -4714.27072305 A.U.

Imaginary Frequency 527.71i

|   |             |            |             |
|---|-------------|------------|-------------|
| C | -0.59578800 | 2.87268600 | -0.22283800 |
| C | 0.79523600  | 2.93155700 | -0.08175900 |
| C | 1.53266000  | 4.08911600 | -0.31355600 |
| C | 0.82049800  | 5.21503700 | -0.69852100 |
| C | -0.57604000 | 5.18538500 | -0.84507200 |
| C | -1.29638900 | 4.02425800 | -0.61018700 |

|   |             |             |             |
|---|-------------|-------------|-------------|
| C | -0.96581300 | 1.49632900  | 0.11583300  |
| C | 0.28909400  | 0.85428000  | 0.44762600  |
| H | 2.60815200  | 4.09473000  | -0.17815500 |
| H | 1.35626700  | 6.14122500  | -0.88652500 |
| H | -1.10006800 | 6.08621700  | -1.14723600 |
| H | -2.37196200 | 4.00834200  | -0.73273400 |
| O | 1.32982100  | 1.76110100  | 0.30717100  |
| C | 0.55087400  | -0.42520800 | 0.88302400  |
| N | -2.11989400 | 0.87399600  | 0.18481900  |
| C | -0.51125200 | -1.46753300 | 0.75016100  |
| C | -0.94629800 | -2.18844700 | 1.86318500  |
| C | -0.97810300 | -1.81705700 | -0.52181500 |
| C | -1.85053900 | -3.23946800 | 1.71301000  |
| H | -0.57208500 | -1.92070500 | 2.84775100  |
| C | -1.87238900 | -2.87012800 | -0.67020900 |
| H | -0.61297200 | -1.26140200 | -1.38191900 |
| C | -2.31008000 | -3.58422800 | 0.44542200  |
| H | -2.18678200 | -3.79158800 | 2.58631200  |
| H | -2.22700000 | -3.13761500 | -1.66066300 |
| H | -3.00929800 | -4.40687600 | 0.32374700  |
| S | -3.52338400 | 1.64289500  | -0.11972800 |
| O | -3.61817200 | 2.16747900  | -1.48716400 |
| O | -3.86745400 | 2.57555700  | 0.95855700  |
| C | -4.63382900 | 0.25064400  | -0.03902700 |
| C | -5.81415200 | 0.33566700  | -0.77156800 |
| C | -4.36536600 | -0.85512700 | 0.75955800  |
| C | -6.74321400 | -0.69471900 | -0.68607600 |
| H | -5.97962400 | 1.19331000  | -1.41597100 |
| C | -5.30345500 | -1.88000600 | 0.82833100  |
| H | -3.41844400 | -0.92323500 | 1.28633200  |
| C | -6.50413900 | -1.81229900 | 0.11835600  |
| H | -7.66375400 | -0.63835800 | -1.26220600 |
| H | -5.08581300 | -2.75591500 | 1.43530000  |
| C | -7.52619700 | -2.91586900 | 0.22658600  |
| H | -7.04773000 | -3.88220200 | 0.40981600  |
| H | -8.21850900 | -2.72905200 | 1.05568800  |
| H | -8.12164200 | -2.99722400 | -0.68731300 |
| C | 1.81415100  | -0.95657400 | 1.28176600  |
| C | 2.90455700  | -0.19185300 | 1.91626100  |
| O | 2.93390700  | 0.97118000  | 2.25108600  |
| O | 3.96228100  | -1.02767200 | 2.13534400  |
| C | 5.04615900  | -0.23435300 | 4.16538500  |
| C | 5.13588800  | -0.41178800 | 2.65867600  |
| H | 5.98455900  | 0.17111600  | 4.55726300  |
| H | 4.23602100  | 0.45523800  | 4.41055000  |

|    |            |             |             |
|----|------------|-------------|-------------|
| H  | 4.85483000 | -1.19625500 | 4.64983100  |
| H  | 5.95048100 | -1.08691800 | 2.38618700  |
| H  | 5.28613000 | 0.54958300  | 2.15995500  |
| H  | 1.76062200 | -1.96828200 | 1.67385800  |
| Br | 3.91669800 | -2.89048100 | -2.31099600 |
| C  | 2.70601700 | -1.78895200 | -0.47221100 |
| C  | 2.72117600 | -0.49718000 | -1.19738000 |
| O  | 1.84813000 | -0.10846600 | -1.93606100 |
| O  | 3.80525600 | 0.22008800  | -0.84660200 |
| C  | 4.72107500 | 2.35535200  | -0.43890600 |
| C  | 3.92581500 | 1.51921100  | -1.42138600 |
| H  | 3.54146900 | -2.08485800 | 0.13906700  |
| H  | 1.87672600 | -2.45322700 | -0.65865200 |
| H  | 4.18894100 | 2.39135400  | 0.51764100  |
| H  | 5.70842200 | 1.91422700  | -0.27099200 |
| H  | 4.85840100 | 3.37246400  | -0.82104800 |
| H  | 4.43315300 | 1.42104200  | -2.38779800 |
| H  | 2.92936600 | 1.93085400  | -1.59597600 |

#### N-TS7-A

|                                          |                             |
|------------------------------------------|-----------------------------|
| Zero-point correction=                   | 0.729905 (Hartree/Particle) |
| Thermal correction to Energy=            | 0.773524                    |
| Thermal correction to Enthalpy=          | 0.774469                    |
| Thermal correction to Gibbs Free Energy= | 0.649337                    |

E(solv) = -2485.27893918 A.U.

Imaginary Frequency 630.23i

|   |             |             |             |
|---|-------------|-------------|-------------|
| C | -0.43148900 | -2.92967800 | 0.09205900  |
| C | 0.95538600  | -2.77361500 | 0.15416300  |
| C | 1.83985400  | -3.83209900 | -0.01374600 |
| C | 1.28105700  | -5.08897500 | -0.21748500 |
| C | -0.10699300 | -5.27621500 | -0.25132800 |
| C | -0.97622200 | -4.20488200 | -0.09640200 |
| C | -0.99462800 | -1.58908700 | 0.29558200  |
| C | 0.16865300  | -0.70828300 | 0.40908800  |
| H | 2.91429500  | -3.68189400 | 0.02276600  |
| H | 1.93840900  | -5.94347500 | -0.34745300 |
| H | -0.50868800 | -6.27221900 | -0.40199900 |
| H | -2.04866700 | -4.35179100 | -0.13549700 |
| O | 1.33427600  | -1.48585600 | 0.37105000  |
| C | 0.27125700  | 0.65031900  | 0.50153800  |
| N | -2.19939500 | -1.13139800 | 0.41713500  |
| C | -0.93813200 | 1.47180000  | 0.20609100  |
| C | -1.63020200 | 1.32881800  | -0.99885900 |
| C | -1.38450300 | 2.40948700  | 1.13810600  |
| C | -2.76223100 | 2.08702200  | -1.25857600 |



|   |             |             |             |
|---|-------------|-------------|-------------|
| H | -1.28246500 | 0.59588600  | -1.72298900 |
| C | -2.52674800 | 3.16536400  | 0.88482600  |
| H | -0.84105500 | 2.53437100  | 2.07193400  |
| C | -3.21828900 | 3.00423400  | -0.31141600 |
| H | -3.29864400 | 1.95789700  | -2.19367200 |
| H | -2.87621400 | 3.87923100  | 1.62496200  |
| H | -4.11195400 | 3.58927800  | -0.51043600 |
| S | -3.53863900 | -2.05044100 | 0.12925200  |
| O | -3.88546900 | -2.82304200 | 1.31771900  |
| O | -3.44495400 | -2.74733000 | -1.15528400 |
| C | -4.69928100 | -0.72042000 | -0.06771100 |
| C | -4.98193900 | 0.10403100  | 1.01897800  |
| C | -5.27653600 | -0.50548100 | -1.31001900 |
| C | -5.85673800 | 1.16472700  | 0.84319000  |
| H | -4.50468900 | -0.07861800 | 1.97684700  |
| C | -6.15662800 | 0.56378800  | -1.46726100 |
| H | -5.02813000 | -1.16621600 | -2.13422800 |
| C | -6.45481600 | 1.41023000  | -0.40001900 |
| H | -6.07660300 | 1.82422600  | 1.67933800  |
| H | -6.61560800 | 0.74272300  | -2.43623400 |
| C | -7.40898000 | 2.56523600  | -0.56467300 |
| H | -7.64318300 | 2.74174900  | -1.61747100 |
| H | -8.35049200 | 2.37246000  | -0.03903500 |
| H | -6.98780600 | 3.48652300  | -0.14934900 |
| C | 1.52747300  | 1.30619000  | 0.88559600  |
| C | 1.64062200  | 2.68964800  | 0.43358000  |
| O | 1.28130000  | 3.09834700  | -0.66457700 |
| O | 2.29909200  | 3.50637900  | 1.29710300  |
| C | 3.23272600  | 5.58533200  | 1.94208300  |
| C | 2.51725300  | 4.84012500  | 0.83481600  |
| H | 3.42146800  | 6.61958300  | 1.64144100  |
| H | 2.62696500  | 5.59239000  | 2.85171300  |
| H | 4.19021900  | 5.10943300  | 2.17083000  |
| H | 3.11001000  | 4.81332000  | -0.08682900 |
| H | 1.55357900  | 5.29480500  | 0.58692600  |
| H | 2.51195200  | 0.77965700  | -0.24943400 |
| C | 2.09466000  | 1.01661400  | 2.28060400  |
| C | 2.41820100  | -0.42347200 | 2.59463300  |
| O | 1.76097100  | -1.14029300 | 3.30556900  |
| O | 3.58577500  | -0.82560600 | 2.03506400  |
| C | 5.23626100  | -2.51296000 | 1.65468800  |
| C | 3.96076300  | -2.16160500 | 2.39118500  |
| H | 3.01599200  | 1.59162500  | 2.40116800  |
| H | 1.39633900  | 1.33563900  | 3.06323200  |
| H | 5.07571300  | -2.56890500 | 0.57349800  |

|   |            |             |             |
|---|------------|-------------|-------------|
| H | 6.01231000 | -1.76705700 | 1.84924800  |
| H | 5.60277400 | -3.48650900 | 1.99174400  |
| H | 4.10236300 | -2.20713100 | 3.47575200  |
| H | 3.13772300 | -2.83968200 | 2.14695700  |
| N | 4.31656200 | 0.19108300  | -3.44034200 |
| C | 4.82138000 | 1.40425900  | -2.79136900 |
| C | 3.98390900 | -0.62750100 | -1.12584600 |
| C | 2.10644800 | 0.36648000  | -2.32355400 |
| C | 2.87470500 | 0.33947200  | -3.67118200 |
| C | 4.53718700 | -0.94350500 | -2.53944800 |
| C | 3.94591400 | 1.76155500  | -1.56384500 |
| N | 3.11132200 | 0.56875500  | -1.24240500 |
| H | 5.86135000 | 1.22378100  | -2.50162400 |
| H | 4.81433100 | 2.22435400  | -3.51497300 |
| H | 4.76645200 | -0.38082900 | -0.40338600 |
| H | 3.37721200 | -1.43056700 | -0.70590700 |
| H | 1.59998200 | -0.57904400 | -2.10799900 |
| H | 1.38374200 | 1.18395200  | -2.23950900 |
| H | 2.53004300 | -0.49011800 | -4.29481400 |
| H | 2.71565100 | 1.26606700  | -4.23088400 |
| H | 4.03768400 | -1.81816000 | -2.96794000 |
| H | 5.60893400 | -1.15987700 | -2.49638000 |
| H | 4.52947300 | 2.00611200  | -0.67070900 |
| H | 3.25398200 | 2.58249400  | -1.75991900 |

### N-TS9

|                                          |                             |
|------------------------------------------|-----------------------------|
| Zero-point correction=                   | 0.400941 (Hartree/Particle) |
| Thermal correction to Energy=            | 0.426483                    |
| Thermal correction to Enthalpy=          | 0.427427                    |
| Thermal correction to Gibbs Free Energy= | 0.343257                    |
| E(solv) =                                | -1319.82268794 A.U.         |

|                     |             |             |             |
|---------------------|-------------|-------------|-------------|
| Imaginary Frequency | 458.64i     |             |             |
| C                   | -0.73489700 | -1.89794300 | 0.59623200  |
| C                   | -1.60194300 | -2.19508300 | -0.59436800 |
| O                   | -1.39610000 | -1.83711500 | -1.72685700 |
| O                   | -2.63265500 | -2.97381500 | -0.23385000 |
| C                   | -4.61699700 | -4.18819500 | -0.69668400 |
| C                   | -3.53836400 | -3.30937900 | -1.29186000 |
| H                   | -0.82564800 | -2.61780100 | 1.40574300  |
| H                   | -5.33668300 | -4.47325500 | -1.46864000 |
| H                   | -4.18162300 | -5.09711900 | -0.27404500 |
| H                   | -5.14956700 | -3.65856200 | 0.09722300  |
| H                   | -3.94455500 | -2.38439400 | -1.71284000 |
| H                   | -2.98318600 | -3.81771000 | -2.08590900 |
| C                   | -2.15333900 | 2.05107300  | 0.66726200  |

|   |             |             |             |
|---|-------------|-------------|-------------|
| C | -1.42104500 | 2.79359100  | -0.26337300 |
| C | -1.68042700 | 4.13461000  | -0.51827200 |
| C | -2.70748100 | 4.72086400  | 0.21109300  |
| C | -3.45642900 | 3.99427900  | 1.15151200  |
| C | -3.19543400 | 2.65061600  | 1.37679000  |
| C | -1.65645500 | 0.68254500  | 0.55666800  |
| C | -0.50171900 | 0.78795800  | -0.31401900 |
| H | -1.10088100 | 4.68435500  | -1.25077700 |
| H | -2.93932600 | 5.76833400  | 0.04611600  |
| H | -4.25165700 | 4.48964400  | 1.69787000  |
| H | -3.78494500 | 2.08039600  | 2.08907800  |
| O | -0.45416400 | 2.06040400  | -0.86921200 |
| C | 0.59421300  | -0.03458200 | -0.30563300 |
| N | -2.10845800 | -0.43091900 | 1.05497400  |
| C | 1.87563200  | 0.33838300  | -0.95113900 |
| C | 2.56073900  | -0.65092100 | -1.66380900 |
| C | 2.43793900  | 1.61308000  | -0.83721300 |
| C | 3.78664600  | -0.37114700 | -2.25684600 |
| H | 2.11291600  | -1.63694400 | -1.75176900 |
| C | 3.67098700  | 1.88646000  | -1.41863900 |
| H | 1.91813600  | 2.38051600  | -0.27466300 |
| C | 4.34775000  | 0.89797500  | -2.13088300 |
| H | 4.30521300  | -1.14409000 | -2.81574500 |
| H | 4.10753600  | 2.87500400  | -1.31334800 |
| H | 5.30786800  | 1.11732300  | -2.58808900 |
| C | 0.47736400  | -1.24699800 | 0.46999300  |
| C | 1.52187800  | -1.63819900 | 1.44758700  |
| O | 1.44589800  | -2.59787300 | 2.18558900  |
| O | 2.57763900  | -0.80933700 | 1.43764000  |
| C | 4.82756100  | -0.25397900 | 1.86200600  |
| C | 3.69929200  | -1.19283300 | 2.23567000  |
| H | 5.73299900  | -0.50435000 | 2.42152700  |
| H | 5.03778000  | -0.32818300 | 0.79103000  |
| H | 4.55325100  | 0.78095300  | 2.08270500  |
| H | 3.42838700  | -1.12052400 | 3.29391200  |
| H | 3.94392100  | -2.23870000 | 2.02731100  |
| H | -2.72849600 | -0.30960400 | 1.85956500  |

### N-TS8

|                                          |                             |
|------------------------------------------|-----------------------------|
| Zero-point correction=                   | 0.732103 (Hartree/Particle) |
| Thermal correction to Energy=            | 0.776116                    |
| Thermal correction to Enthalpy=          | 0.777060                    |
| Thermal correction to Gibbs Free Energy= | 0.651427                    |
| E(solv) =                                | -2485.26069613 A.U.         |
| Imaginary Frequency                      | 190.49i                     |

|   |             |             |             |
|---|-------------|-------------|-------------|
| C | 0.28838800  | 2.03480700  | -1.02684500 |
| C | -0.36991200 | 3.20380600  | -0.43624200 |
| O | 0.06093100  | 3.95415700  | 0.41045600  |
| O | -1.63279800 | 3.33001400  | -0.93708300 |
| C | -3.73107600 | 4.42011000  | -1.09017500 |
| C | -2.37403500 | 4.43849000  | -0.41966500 |
| H | -0.25948800 | 1.52123700  | -1.81109300 |
| H | -4.34153400 | 5.25619600  | -0.73885900 |
| H | -3.62634900 | 4.49569200  | -2.17575900 |
| H | -4.26145900 | 3.48938400  | -0.86018900 |
| H | -2.44928100 | 4.34408900  | 0.66840400  |
| H | -1.82880500 | 5.36339800  | -0.63088300 |
| C | -0.47260500 | -2.52683300 | -1.33435600 |
| C | 0.75503800  | -2.97409500 | -1.81671000 |
| C | 0.96843600  | -4.25783600 | -2.27913800 |
| C | -0.12522800 | -5.12697500 | -2.23252800 |
| C | -1.35993400 | -4.71334700 | -1.72363100 |
| C | -1.54496100 | -3.41094400 | -1.25995500 |
| C | -0.27149600 | -1.14782800 | -0.92524200 |
| C | 1.14035300  | -0.86361100 | -1.17919600 |
| H | 1.93942700  | -4.56761000 | -2.64869100 |
| H | -0.00597600 | -6.14679900 | -2.58407400 |
| H | -2.17939700 | -5.42321700 | -1.67194900 |
| H | -2.47938500 | -3.10093700 | -0.80094000 |
| O | 1.70166300  | -1.98984300 | -1.74300500 |
| C | 1.97582000  | 0.21101000  | -0.95023800 |
| N | -1.21178100 | -0.42860400 | -0.33606100 |
| C | 3.44852100  | 0.08749400  | -1.10378000 |
| C | 4.17072200  | 1.14709500  | -1.66899200 |
| C | 4.15857500  | -1.04299200 | -0.67255000 |
| C | 5.55706400  | 1.08866700  | -1.78587700 |
| H | 3.63836800  | 2.02363600  | -2.02747400 |
| C | 5.54030300  | -1.10345400 | -0.79841600 |
| H | 3.61524300  | -1.87144400 | -0.23187000 |
| C | 6.24840900  | -0.03669900 | -1.35128600 |
| H | 6.09323100  | 1.92281400  | -2.22892800 |
| H | 6.06963400  | -1.98905100 | -0.45681300 |
| H | 7.32908100  | -0.08677000 | -1.44467200 |
| S | -1.33819400 | -0.89979000 | 1.91227400  |
| O | -2.31061000 | -2.03434900 | 1.81701000  |
| O | -1.59856400 | 0.12488500  | 2.96032000  |
| C | 0.28075800  | -1.59160000 | 2.18104900  |
| C | 0.56697200  | -2.88197000 | 1.74936900  |
| C | 1.29062500  | -0.72108700 | 2.58663000  |
| C | 1.88886800  | -3.32052100 | 1.77251600  |

|   |             |             |             |
|---|-------------|-------------|-------------|
| H | -0.23736300 | -3.52553400 | 1.40319700  |
| C | 2.60254500  | -1.17153200 | 2.59787000  |
| H | 1.05273900  | 0.30131300  | 2.86229000  |
| C | 2.91703700  | -2.47735100 | 2.20220600  |
| H | 2.12563500  | -4.32718500 | 1.43598200  |
| H | 3.39640000  | -0.48960600 | 2.89030400  |
| C | 4.34696100  | -2.95291100 | 2.22856000  |
| H | 5.03309800  | -2.13621400 | 1.98429000  |
| H | 4.61543100  | -3.32754900 | 3.22286800  |
| H | 4.50960400  | -3.76514500 | 1.51329400  |
| C | 1.45787800  | 1.51256900  | -0.57212600 |
| C | 2.28219900  | 2.31311000  | 0.41582900  |
| O | 2.50325200  | 1.95363900  | 1.54485900  |
| O | 2.72936400  | 3.45019700  | -0.11810400 |
| C | 3.59917100  | 5.64510000  | 0.06109300  |
| C | 3.32738300  | 4.36152500  | 0.81379500  |
| H | 4.04953000  | 6.38445800  | 0.72895400  |
| H | 4.28279000  | 5.46740300  | -0.77348300 |
| H | 2.66405100  | 6.05115900  | -0.33279000 |
| H | 2.62404500  | 4.51011300  | 1.63810100  |
| H | 4.24020200  | 3.91051300  | 1.21524900  |
| H | -0.91808700 | 0.53805400  | -0.19194700 |
| N | -6.28826900 | 0.45274500  | -0.15836900 |
| C | -5.68785400 | 0.68786300  | -1.47155000 |
| C | -4.77461100 | -1.50834000 | 0.04220200  |
| C | -4.08597000 | 0.65149600  | 0.96916100  |
| C | -5.53434000 | 1.19420000  | 0.85450900  |
| C | -6.22857900 | -0.97707900 | 0.15569200  |
| C | -4.17556600 | 0.34211100  | -1.45270400 |
| N | -3.88682600 | -0.32364900 | -0.14974900 |
| H | -6.21865600 | 0.07402900  | -2.20515600 |
| H | -5.83832800 | 1.73653400  | -1.74473800 |
| H | -4.63414300 | -2.15320700 | -0.83000400 |
| H | -4.40736300 | -2.02722100 | 0.92989600  |
| H | -3.89288200 | 0.11688300  | 1.90075400  |
| H | -3.32002400 | 1.42612000  | 0.86170500  |
| H | -6.04970800 | 1.10085000  | 1.81393200  |
| H | -5.54068300 | 2.25252000  | 0.57757600  |
| H | -6.61405200 | -1.11706300 | 1.16928100  |
| H | -6.89001600 | -1.51509000 | -0.52917700 |
| H | -3.87939900 | -0.35110800 | -2.24453200 |
| H | -3.52740000 | 1.22291600  | -1.50660200 |
| H | -2.84055000 | -0.59966500 | -0.18386900 |

**N-TS7-B**

Zero-point correction= 0.732039 (Hartree/Particle)  
 Thermal correction to Energy= 0.775180  
 Thermal correction to Enthalpy= 0.776125  
 Thermal correction to Gibbs Free Energy= 0.653409

E(solv) = -2485.27364300 A.U.

Imaginary Frequency 1193.84i

|   |             |             |             |
|---|-------------|-------------|-------------|
| C | 0.57592000  | 3.00068800  | -1.22521000 |
| C | -0.78884600 | 3.14168300  | -1.51241000 |
| C | -1.42332600 | 4.36504100  | -1.68516800 |
| C | -0.63501400 | 5.49947500  | -1.55109100 |
| C | 0.73456500  | 5.39434500  | -1.26324600 |
| C | 1.35429000  | 4.16305300  | -1.10393300 |
| C | 0.79944600  | 1.56059000  | -1.13730800 |
| C | -0.43190100 | 0.97842800  | -1.32773500 |
| H | -2.48236200 | 4.41516000  | -1.91505300 |
| H | -1.08439800 | 6.48001000  | -1.67505100 |
| H | 1.32685900  | 6.29900000  | -1.16974800 |
| H | 2.41524300  | 4.10648300  | -0.89574200 |
| O | -1.40718200 | 1.93648000  | -1.58450800 |
| C | -0.86558600 | -0.39713200 | -1.19219800 |
| N | 1.93289900  | 0.80035100  | -0.90268900 |
| C | -1.90846700 | -0.91280000 | -2.14303700 |
| C | -3.09272500 | -0.22012500 | -2.43457700 |
| C | -1.68708400 | -2.12773900 | -2.81052000 |
| C | -4.03689300 | -0.74867300 | -3.31383600 |
| H | -3.25915000 | 0.76121000  | -2.00756600 |
| C | -2.62876000 | -2.65585700 | -3.68526500 |
| H | -0.74762500 | -2.65201200 | -2.65794500 |
| C | -3.81692900 | -1.97386000 | -3.93420900 |
| H | -4.94255500 | -0.18713700 | -3.52504900 |
| H | -2.42412000 | -3.59611900 | -4.18843300 |
| H | -4.55066500 | -2.38113100 | -4.62272500 |
| S | 3.26018500  | 1.57461900  | -0.30825300 |
| O | 2.94764700  | 2.23388000  | 0.96616300  |
| O | 3.91492400  | 2.37338000  | -1.34418500 |
| C | 4.29299200  | 0.16958500  | 0.03662300  |
| C | 4.18014800  | -0.46942600 | 1.26683800  |
| C | 5.19680300  | -0.25874100 | -0.92929600 |
| C | 4.99003000  | -1.57174700 | 1.52056100  |
| H | 3.46769400  | -0.11240600 | 2.00637500  |
| C | 5.99853800  | -1.36034600 | -0.65424100 |
| H | 5.26464000  | 0.27516600  | -1.87182800 |
| C | 5.90744600  | -2.02826700 | 0.57067900  |
| H | 4.91094600  | -2.08279300 | 2.47679100  |
| H | 6.71000900  | -1.70817400 | -1.39904300 |

|   |             |             |             |
|---|-------------|-------------|-------------|
| C | 6.80911800  | -3.19813200 | 0.87228300  |
| H | 7.04034300  | -3.76560500 | -0.03353600 |
| H | 7.75937500  | -2.85542900 | 1.29719300  |
| H | 6.35066300  | -3.87744200 | 1.59604800  |
| C | -0.28326500 | -1.24054200 | -0.27456200 |
| C | -0.77537100 | -2.65022700 | -0.16371600 |
| O | -1.89694900 | -2.94248600 | 0.22008700  |
| O | 0.14934700  | -3.56725900 | -0.43955300 |
| C | 0.94154300  | -5.79449700 | -0.63912200 |
| C | -0.24439800 | -4.93746500 | -0.25553500 |
| H | 0.69576400  | -6.85185300 | -0.50993100 |
| H | 1.21581200  | -5.62439700 | -1.68313000 |
| H | 1.80469100  | -5.55639600 | -0.01294200 |
| H | -0.53938200 | -5.07977800 | 0.78863800  |
| H | -1.12076900 | -5.13414800 | -0.88123300 |
| H | -2.37396200 | -0.79401100 | 0.45602400  |
| C | 0.78416300  | -0.95851600 | 0.70427200  |
| C | 0.66206900  | -0.01619700 | 1.81932400  |
| O | 1.31724100  | -0.06763800 | 2.84282500  |
| O | -0.19664300 | 1.01854000  | 1.58083600  |
| C | -0.72244700 | 2.10300500  | 3.70883300  |
| C | 0.01350300  | 2.19420000  | 2.38375700  |
| H | 1.29192700  | -1.85739600 | 1.04816400  |
| H | 1.59357200  | -0.16642600 | -0.07763900 |
| H | -1.79996100 | 1.96185500  | 3.55276500  |
| H | -0.33359900 | 1.26807300  | 4.29675000  |
| H | -0.58870100 | 3.02604400  | 4.28069400  |
| H | 1.08808800  | 2.32607400  | 2.52353300  |
| H | -0.36090400 | 3.01635600  | 1.76581500  |
| N | -4.94849600 | 0.11821200  | 2.72414600  |
| C | -3.87773300 | -0.57632200 | 3.44072500  |
| C | -3.35272200 | 0.95933700  | 1.01496300  |
| C | -4.37565900 | -1.26456900 | 0.74007500  |
| C | -5.49390600 | -0.76487000 | 1.69241300  |
| C | -4.40701300 | 1.32220900  | 2.09391600  |
| C | -2.69486900 | -0.89822400 | 2.49129400  |
| N | -3.12895500 | -0.51992300 | 1.10647300  |
| H | -3.53954900 | 0.05794900  | 4.26497700  |
| H | -4.29242500 | -1.49192800 | 3.87154000  |
| H | -2.37867200 | 1.43317900  | 1.15001000  |
| H | -3.69751000 | 1.16159800  | -0.00016400 |
| H | -4.57153600 | -1.05981300 | -0.31519000 |
| H | -4.14078600 | -2.32410000 | 0.84675800  |
| H | -6.25714800 | -0.21071500 | 1.13887700  |
| H | -5.98598500 | -1.61082300 | 2.17968300  |

|   |             |             |            |
|---|-------------|-------------|------------|
| H | -5.23155100 | 1.88399500  | 1.64681000 |
| H | -3.96541800 | 1.94758600  | 2.87486100 |
| H | -1.80087000 | -0.31118600 | 2.70788200 |
| H | -2.43015300 | -1.95627800 | 2.45290300 |

### N-INT10

|                                          |                             |
|------------------------------------------|-----------------------------|
| Zero-point correction=                   | 0.404542 (Hartree/Particle) |
| Thermal correction to Energy=            | 0.430131                    |
| Thermal correction to Enthalpy=          | 0.431075                    |
| Thermal correction to Gibbs Free Energy= | 0.346132                    |

E(solv) = -1319.87764548 A.U.

|   |             |             |             |
|---|-------------|-------------|-------------|
| C | -0.40428800 | -1.74692600 | 0.87569000  |
| C | -0.84021700 | -2.37346700 | -0.46441600 |
| O | -0.12370200 | -2.53865900 | -1.41636100 |
| O | -2.12805000 | -2.75383200 | -0.41599500 |
| C | -4.09426200 | -3.68037300 | -1.37390200 |
| C | -2.63034700 | -3.37859300 | -1.60793100 |
| H | -0.15671600 | -2.58036800 | 1.53889800  |
| H | -4.52415300 | -4.15653800 | -2.25895800 |
| H | -4.21792300 | -4.35516400 | -0.52301600 |
| H | -4.64792700 | -2.75965100 | -1.17227200 |
| H | -2.47786500 | -2.69649400 | -2.44907000 |
| H | -2.04544700 | -4.28251500 | -1.80178900 |
| C | -2.79018700 | 1.13581400  | 0.74915900  |
| C | -2.31782500 | 2.23099800  | 0.00236300  |
| C | -3.11598100 | 3.32053800  | -0.32312600 |
| C | -4.42609000 | 3.29233000  | 0.13447800  |
| C | -4.92111100 | 2.21146400  | 0.88717700  |
| C | -4.11676900 | 1.12780600  | 1.19954500  |
| C | -1.66390500 | 0.24739000  | 0.83353200  |
| C | -0.63581700 | 0.85733600  | 0.16721700  |
| H | -2.72083100 | 4.14609500  | -0.90391600 |
| H | -5.08437000 | 4.12439800  | -0.09352500 |
| H | -5.95147600 | 2.23031400  | 1.22649300  |
| H | -4.50396300 | 0.29648000  | 1.78079000  |
| O | -1.01673600 | 2.07478100  | -0.34796700 |
| C | 0.71009500  | 0.35234800  | 0.16003500  |
| N | -1.46177400 | -0.95099700 | 1.48832300  |
| C | 1.79186200  | 1.21111800  | -0.38398800 |
| C | 2.56212000  | 0.74644900  | -1.45397400 |
| C | 2.00783400  | 2.49594700  | 0.11519700  |
| C | 3.55327200  | 1.55141400  | -2.00177400 |
| H | 2.36817600  | -0.24779100 | -1.84778800 |
| C | 3.01238100  | 3.29455100  | -0.42423300 |
| H | 1.39432000  | 2.86287500  | 0.93281700  |



|   |             |             |             |
|---|-------------|-------------|-------------|
| C | 3.78636400  | 2.82416700  | -1.48138700 |
| H | 4.14452300  | 1.18710700  | -2.83649100 |
| H | 3.18591300  | 4.28770700  | -0.02174800 |
| H | 4.56405900  | 3.45123400  | -1.90663300 |
| C | 0.84280100  | -0.91437500 | 0.64645700  |
| C | 2.10415300  | -1.64150900 | 0.89368600  |
| O | 2.14283400  | -2.83062500 | 1.13483600  |
| O | 3.19358900  | -0.86386400 | 0.87217100  |
| C | 5.52293000  | -0.47874400 | 0.91448300  |
| C | 4.44588200  | -1.53428500 | 1.04789400  |
| H | 6.51198900  | -0.93205500 | 1.02240800  |
| H | 5.45927400  | 0.00625300  | -0.06325900 |
| H | 5.40305400  | 0.28860200  | 1.68346300  |
| H | 4.45621700  | -2.01892100 | 2.02908300  |
| H | 4.53745000  | -2.31889900 | 0.29041900  |
| H | -2.30274500 | -1.48648000 | 1.66927700  |
